# Supplementary material for: DisCoVering potential candidates of RNAi-based therapy for COVID-19 using computational methods
Source: PeerJ. 2021 Feb 26;9:e10505. doi: 10.7717/peerj.10505 (PMC7919535; doi:10.7717/peerj.10505)
Supplement: Supplemental Information 1 — Sheet 1: The UCRs of SARS-CoV-2 including their regions, sequences, corresponding proteins, and unpaired probabilities. Sheet 2: The computed free binding energy between human miRNAs and mRNAs. Sheet 3: Comparison of binding energy for binding human miRNAs to mRNAs or UCRs. Sheet 4: The computed free binding energy between bat miRNAs and human mRNAs. Sheet 5: The list of possible mRNA targets for candidate bat-specific miRNAs. Sheet 6: The computed free binding energy between miRNAs of all species and human mRNAs. Sheet 7: The list of possible mRNA targets for candidate miRNAs in other species. [file peerj-09-10505-s001.xlsx]

## Sheet: UCR Regions
UCR index	UCR location	Average unpaired probability	Minimum unpaired proability	Sequence	protein
1	9578-9598	0.825697	0.627812	UAUUCUGUUAUUUACUUGUAC	ORF1ab polyprotein,nsp4
2	8078-8094	0.82497	0.752542	CCAAUGGAAAAACUCAA	ORF1ab polyprotein,nsp3
3	7366-7384	0.723602	0.605523	AAUAAUUAAUCUUGUACAA	ORF1ab polyprotein,nsp3
4	7161-7174	0.774316	0.62504	ACACCUAUCCUUCU	ORF1ab polyprotein,nsp3
5	6757-6783	0.78979	0.633073	UUGUACUAAUUAUAUGCCUUAUUUCUU	ORF1ab polyprotein,nsp3
6	6515-6529	0.81084	0.624018	UUAAAAAUUACAGAA	ORF1ab polyprotein,nsp3
7	6225-6238	0.734349	0.628462	AUAAACCUAUUGUU	ORF1ab polyprotein,nsp3, NAR region
8	6105-6122	0.777239	0.618997	AUAAGAAACCUGCUUCAA	ORF1ab polyprotein,nsp3, NAR region
9	6072-6086	0.727041	0.614595	AAUUUGCUGAUGAUU	ORF1ab polyprotein,nsp3, NAR region
10	6010-6029	0.738649	0.624805	ACCAAACCAACCAUAUCCAA	ORF1ab polyprotein,nsp3, NAR region
11	5773-5789	0.808284	0.65353	UAAACAUAUAACUUCUA	ORF1ab polyprotein,nsp3, NAR region
12	3797-3816	0.741669	0.60258	UUUGAUAAAAAUCUCUAUGA	ORF1ab polyprotein,nsp3
13	29074-29087	0.891105	0.763759	AUACAAUGUAACAC	ORF9ab, NAR region
14	29008-29023	0.779731	0.607881	UGUCACUAAGAAAUCU	ORF9ab, NAR region
15	28853-28866	0.770189	0.611938	UCAAGAAAUUCAAC	ORF9ab, NAR region
16	28436-28452	0.80827	0.618884	GCUCUCACUCAACAUGG	ORF9ab, NAR region
17	28148-28162	0.734308	0.616622	UUUUACAAUUAAUUG	ORF8ab, NAR region
18	27385-27402	0.809693	0.653733	UAAACGAACAUGAAAAUU	ORF7a
19	27361-27375	0.740696	0.61226	GAAGAGCAACCAAUG	ORF6, sars6 open fram
20	26429-26447	0.741331	0.615047	UUAAAAAUCUGAAUUCUUC	E gene, ORF4
21	25569-25582	0.825796	0.648774	UUCCAAAAUCAUAA	ORF3a, APA3_viroporin Coronavirus accessory protein 3a
22	25417-25437	0.747166	0.639634	ACAAUUGGAACUGUAACUUUG	ORF3a, APA3_viroporin Coronavirus accessory protein 3a
23	24778-24797	0.771131	0.622469	AAAGAACUUCACAACUGCUC	surface glycoprotein structural protein; spike protein, Corona_S2 Coronavirus S2 glycoprotein
24	24165-24178	0.745439	0.616288	AAAUGAUUGCUCAA	surface glycoprotein structural protein; spike protein, Corona_S2 Coronavirus S2 glycoprotein
25	23985-23998	0.799754	0.625346	AUCCAUCAAAACCA	surface glycoprotein structural protein; spike protein, Corona_S2 Coronavirus S2 glycoprotein
26	23960-23981	0.787037	0.677563	UUUAAUUUUUCACAAAUAUUAC	surface glycoprotein structural protein; spike protein, Corona_S2 Coronavirus S2 glycoprotein
27	23910-23932	0.837777	0.652669	CACAAGUCAAACAAAUUUACAAA	surface glycoprotein structural protein; spike protein, Corona_S2 Coronavirus S2 glycoprotein
28	23700-23718	0.822733	0.654787	CCAUACCCACAAAUUUUAC	surface glycoprotein structural protein; spike protein, Corona_S2 Coronavirus S2 glycoprotein
29	22552-22565	0.773461	0.646815	UAAUAUUACAAACU	surface glycoprotein structural protein; spike protein, Spike_rec_bind Spike receptor binding domain
30	22281-22296	0.741833	0.600606	CUUUACUUGCUUUACA	surface glycoprotein structural protein;
31	21669-21683	0.788644	0.621176	UUUAUUACCCUGACA	surface glycoprotein structural protein;
32	21649-21662	0.820527	0.626762	UAAUUCUUUCACAC	surface glycoprotein structural protein;
33	21626-21643	0.857235	0.713387	ACUCAAUUACCCCCUGCA	surface glycoprotein structural protein;
34	19569-19588	0.75387	0.648103	UUACAAACAAUUUGAUACUU	ORF1ab polyprotein,nsp11, 3'-to-5' exonuclease nsp14A2_ExoN and nsp14B_NMT; produced by pp1ab only
35	19260-19273	0.760965	0.609632	UAACCUUAACUUGC	ORF1ab polyprotein,nsp11, 3'-to-5' exonuclease nsp14A2_ExoN and nsp14B_NMT; produced by pp1ab only
36	1918-1933	0.751566	0.614279	UCUUGAAACUGCUCAA	ORF1ab polyprotein,nsp2
37	18918-18934	0.832132	0.654059	UAUUGAAUAUCCUAUAA	ORF1ab polyprotein,nsp11, 3'-to-5' exonuclease nsp14A2_ExoN and nsp14B_NMT; produced by pp1ab only
38	18681-18694	0.747334	0.605637	CACAUGCUUUUCCA	ORF1ab polyprotein,nsp11, 3'-to-5' exonuclease nsp14A2_ExoN and nsp14B_NMT; produced by pp1ab only
39	18471-18484	0.779821	0.695284	UCAAUUUAAACACC	ORF1ab polyprotein,nsp11, 3'-to-5' exonuclease nsp14A2_ExoN and nsp14B_NMT; produced by pp1ab only
40	18219-18232	0.749532	0.623586	UAAAAUGAAUUAUC	ORF1ab polyprotein,nsp11, 3'-to-5' exonuclease nsp14A2_ExoN and nsp14B_NMT; produced by pp1ab only
41	17762-17785	0.767426	0.650277	CUGUCUUUAUUUCACCUUAUAAUU	ORF1ab polyprotein, nsp13_ZBD, nsp13_TB, and nsp_HEL1core; zinc-binding domain (ZD), NTPase/helicase domain (HEL), RNA 5'-triphosphatase; produced by pp1ab only , DNA2 Superfamily I DNA and/or RNA helicase [Replication, recombination and repair]
42	16361-16375	0.772562	0.618808	UCUUGUCUGUUAAUC	ORF1ab polyprotein, nsp13_ZBD, nsp13_TB, and nsp_HEL1core; zinc-binding domain (ZD), NTPase/helicase domain (HEL), RNA 5'-triphosphatase; produced by pp1ab only
43	16038-16053	0.780044	0.600438	UUACCCACUUACUAAA	ORF1ab polyprotein, RNA-dependent RNA polymerase nsp12; NiRAN and RdRp; produced by pp1ab only
44	15236-15257	0.747024	0.630481	ACAACAUGUUAAAAACUGUUUA	ORF1ab polyprotein, RNA-dependent RNA polymerase nsp12; NiRAN and RdRp; produced by pp1ab only
45	14899-14913	0.741656	0.610443	UGUAUUAAUGCUAAC	ORF1ab polyprotein, RNA-dependent RNA polymerase nsp12; NiRAN and RdRp; produced by pp1ab only
46	14367-14380	0.714434	0.604803	UUGUGCAAACUUUA	ORF1ab polyprotein, RNA-dependent RNA polymerase nsp12; NiRAN and RdRp; produced by pp1ab only, Coronavirus RPol N-terminus
47	1420-1436	0.796631	0.697304	CGAAUACCAUAAUGAAU	ORF1ab polyprotein, nsp2
48	13990-14003	0.796334	0.661868	CAAGCUUUGUUAAA	ORF1ab polyprotein, RNA-dependent RNA polymerase nsp12; NiRAN and RdRp; produced by pp1ab only, Coronavirus RPol N-terminus
49	1359-1374	0.836512	0.716868	UUGUUAAAAUUUAUUG	ORF1ab polyprotein, nsp2
50	1304-1319	0.821877	0.614536	GAGAAUUUGACUAAAG	ORF1ab polyprotein, nsp2
51	12195-12210	0.745911	0.634404	UUAAAAAGUUGAAGAA	ORF1ab polyprotein, nsp8
52	11910-11923	0.766973	0.683262	AAUCAUCAUCUAAA	ORF1ab polyprotein, nsp7
53	11724-11740	0.729639	0.607945	UUAGAUAUAUGAAUUCA	ORF1ab polyprotein, nsp6
54	11659-11681	0.819159	0.623162	UUUACUCAACCGCUACUUUAGAC	ORF1ab polyprotein, nsp6
55	11628-11645	0.85037	0.606842	AUUUUUGUACUUGUUACU	ORF1ab polyprotein, nsp6
56	11537-11554	0.771241	0.607484	AUUGUUUUUAUGUGUGUU	ORF1ab polyprotein, nsp6
57	1031-1047	0.727712	0.605352	GAAAUUAAAUUGGCAAA	ORF1ab polyprotein, nsp2
58	10009-10035	0.760204	0.656672	UCUUUACCAACCACCACAAACCUCUAU	ORF1ab, ORF1a, nsp4 , nsp4c

## Sheet: Analysis1- Covid19-IntaRNA-Ener
MiRNA name	UCR	MiRNA sequence	Interaction energy
MIMAT0000063_MirBase_let-7b_microRNA	UUUACUCAACCGCUACUUUAGAC	UGAGGUAGUAGGUUGUGUGGUU	-19.08		* energy=0 → no interaction found
MIMAT0000062_MirBase_let-7a_microRNA	UUUACUCAACCGCUACUUUAGAC	UGAGGUAGUAGGUUGUAUAGUU	-16.13
MIMAT0000064_MirBase_let-7c_microRNA	UUUACUCAACCGCUACUUUAGAC	UGAGGUAGUAGGUUGUAUGGUU	-15.79
MIMAT0000414_MirBase_let-7g_microRNA	UUGUACUAAUUAUAUGCCUUAUUUCUU	UGAGGUAGUAGUUUGUACAGUU	-15.63
MIMAT0004688_MirBase_miR-374a*_microRNA	UUACAAACAAUUUGAUACUU	CUUAUCAGAUUGUAUUGUAAUU	-15.27
MIMAT0000066_MirBase_let-7e_microRNA	UUUACUCAACCGCUACUUUAGAC	UGAGGUAGGAGGUUGUAUAGUU	-14.81
MIMAT0000065_MirBase_let-7d_microRNA	UUUACUCAACCGCUACUUUAGAC	AGAGGUAGUAGGUUGCAUAGUU	-14.18
MIMAT0000083_MirBase_miR-26b_microRNA	ACACCUAUCCUUCU	UUCAAGUAAUUCAGGAUAGGU	-13.46
MIMAT0004694_MirBase_miR-342-5p_microRNA	ACUCAAUUACCCCCUGCA	AGGGGUGCUAUCUGUGAUUGA	-13
MIMAT0005793_MirBase_miR-320c_microRNA	UUUACUCAACCGCUACUUUAGAC	AAAAGCUGGGUUGAGAGGGU	-12.92
MIMAT0015072_MirBase_miR-320e_microRNA	UUUACUCAACCGCUACUUUAGAC	AAAGCUGGGUUGAGAAGG	-12.82
MIMAT0004949_MirBase_miR-877_microRNA	UCUUUACCAACCACCACAAACCUCUAU	GUAGAGGAGAUGGCGCAGGG	-12.81
MIMAT0000083_MirBase_miR-26b_microRNA	UAUUCUGUUAUUUACUUGUAC	UUCAAGUAAUUCAGGAUAGGU	-12.8
MIMAT0000066_MirBase_let-7e_microRNA	AUAAGAAACCUGCUUCAA	UGAGGUAGGAGGUUGUAUAGUU	-12.67
MIMAT0000067_MirBase_let-7f_microRNA	UUGUACUAAUUAUAUGCCUUAUUUCUU	UGAGGUAGUAGAUUGUAUAGUU	-12.59
MIMAT0000415_MirBase_let-7i_microRNA	UUGUACUAAUUAUAUGCCUUAUUUCUU	UGAGGUAGUAGUUUGUGCUGUU	-12.49
MIMAT0000066_MirBase_let-7e_microRNA	UAAACAUAUAACUUCUA	UGAGGUAGGAGGUUGUAUAGUU	-12.46
MIMAT0000062_MirBase_let-7a_microRNA	UUGUACUAAUUAUAUGCCUUAUUUCUU	UGAGGUAGUAGGUUGUAUAGUU	-12.41
MIMAT0004602_MirBase_miR-125a-3p_microRNA	AAAGAACUUCACAACUGCUC	ACAGGUGAGGUUCUUGGGAGCC	-12.37
MIMAT0000753_MirBase_miR-342-3p_microRNA	AATGGGTGAATGATTT	UCUCACACAGAAAUCGCACCCGU	-12.27
MIMAT0000063_MirBase_let-7b_microRNA	AAAGAACUUCACAACUGCUC	UGAGGUAGUAGGUUGUGUGGUU	-12.26
MIMAT0000066_MirBase_let-7e_microRNA	UUGUACUAAUUAUAUGCCUUAUUUCUU	UGAGGUAGGAGGUUGUAUAGUU	-12.09
MIMAT0005930_MirBase_miR-1276_microRNA	AAAGAACUUCACAACUGCUC	UAAAGAGCCCUGUGGAGACA	-12.09
MIMAT0000082_MirBase_miR-26a_microRNA	ACACCUAUCCUUCU	UUCAAGUAAUCCAGGAUAGGCU	-11.91
MIMAT0004515_MirBase_miR-29b-2*_microRNA	UGUCACUAAGAAAUCU	CUGGUUUCACAUGGUGGCUUAG	-11.9
MIMAT0000063_MirBase_let-7b_microRNA	UAAACAUAUAACUUCUA	UGAGGUAGUAGGUUGUGUGGUU	-11.83
MIMAT0005825_MirBase_miR-1180_microRNA	CCAUACCCACAAAUUUUAC	UUUCCGGCUCGCGUGGGUGUGU	-11.82
MIMAT0000455_MirBase_miR-185_microRNA	ACAAUUGGAACUGUAACUUUG	UGGAGAGAAAGGCAGUUCCUGA	-11.77
MIMAT0000510_MirBase_miR-320a_microRNA	UUUACUCAACCGCUACUUUAGAC	AAAAGCUGGGUUGAGAGGGCGA	-11.77
MIMAT0000078_MirBase_miR-23a_microRNA	GAAAUUAAAUUGGCAAA	AUCACAUUGCCAGGGAUUUCC	-11.76
MIMAT0000064_MirBase_let-7c_microRNA	UAAACAUAUAACUUCUA	UGAGGUAGUAGGUUGUAUGGUU	-11.74
MIMAT0000096_MirBase_miR-98_microRNA	UUUACUCAACCGCUACUUUAGAC	UGAGGUAGUAAGUUGUAUUGUU	-11.7
MIMAT0004609_MirBase_miR-149*_microRNA	ACACCUAUCCUUCU	AGGGAGGGACGGGGGCUGUGC	-11.7
MIMAT0005792_MirBase_miR-320b_microRNA	UUUACUCAACCGCUACUUUAGAC	AAAAGCUGGGUUGAGAGGGCAA	-11.7
MIMAT0002888_MirBase_miR-532-5p_microRNA	GCUCUCACUCAACAUGG	CAUGCCUUGAGUGUAGGACCGU	-11.62
MIMAT0000082_MirBase_miR-26a_microRNA	UAUUCUGUUAUUUACUUGUAC	UUCAAGUAAUCCAGGAUAGGCU	-11.56
MIMAT0000414_MirBase_let-7g_microRNA	UUUACUCAACCGCUACUUUAGAC	UGAGGUAGUAGUUUGUACAGUU	-11.45
MIMAT0000414_MirBase_let-7g_microRNA	UUGUGCAAACUUUA	UGAGGUAGUAGUUUGUACAGUU	-11.31
MIMAT0000438_MirBase_miR-152_microRNA	UAUUCUGUUAUUUACUUGUAC	UCAGUGCAUGACAGAACUUGG	-11.28
MIMAT0000617_MirBase_miR-200c_microRNA	AUCCAUCAAAACCA	UAAUACUGCCGGGUAAUGAUGGA	-11.12
MIMAT0000226_MirBase_miR-196a_microRNA	UCUUGAAACUGCUCAA	UAGGUAGUUUCAUGUUGUUGGG	-11.1
MIMAT0004767_MirBase_miR-193b*_microRNA	AUCCAUCAAAACCA	CGGGGUUUUGAGGGCGAGAUGA	-11.1
MIMAT0000064_MirBase_let-7c_microRNA	UUGUACUAAUUAUAUGCCUUAUUUCUU	UGAGGUAGUAGGUUGUAUGGUU	-11.07
MIMAT0003297_MirBase_miR-628-3p_microRNA	UUUACUCAACCGCUACUUUAGAC	UCUAGUAAGAGUGGCAGUCGA	-10.94
MIMAT0002872_MirBase_miR-501-5p_microRNA	GCUCUCACUCAACAUGG	AAUCCUUUGUCCCUGGGUGAGA	-10.9
MIMAT0000096_MirBase_miR-98_microRNA	UUACAAACAAUUUGAUACUU	UGAGGUAGUAAGUUGUAUUGUU	-10.88
MIMAT0000096_MirBase_miR-98_microRNA	UUGUACUAAUUAUAUGCCUUAUUUCUU	UGAGGUAGUAAGUUGUAUUGUU	-10.88
MIMAT0000416_MirBase_miR-1_microRNA	CACAUGCUUUUCCA	UGGAAUGUAAAGAAGUAUGUAU	-10.86
MIMAT0004810_MirBase_miR-629_microRNA	CCAAUGGAAAAACUCAA	UGGGUUUACGUUGGGAGAACU	-10.78
MIMAT0000226_MirBase_miR-196a_microRNA	GCUCUCACUCAACAUGG	UAGGUAGUUUCAUGUUGUUGGG	-10.72
MIMAT0003312_MirBase_miR-642a_microRNA	AACACGTTTGAAAT	GUCCCUCUCCAAAUGUGUCUUG	-10.69
MIMAT0004780_MirBase_miR-532-3p_microRNA	CAAGCUUUGUUAAA	CCUCCCACACCCAAGGCUUGCA	-10.69
MIMAT0004767_MirBase_miR-193b*_microRNA	UCUUUACCAACCACCACAAACCUCUAU	CGGGGUUUUGAGGGCGAGAUGA	-10.66
MIMAT0000063_MirBase_let-7b_microRNA	AUAAGAAACCUGCUUCAA	UGAGGUAGUAGGUUGUGUGGUU	-10.63
MIMAT0004784_MirBase_miR-455-3p_microRNA	UUGUACUAAUUAUAUGCCUUAUUUCUU	GCAGUCCAUGGGCAUAUACAC	-10.56
MIMAT0000064_MirBase_let-7c_microRNA	AUAAGAAACCUGCUUCAA	UGAGGUAGUAGGUUGUAUGGUU	-10.54
MIMAT0004672_MirBase_miR-106b*_microRNA	CCAUACCCACAAAUUUUAC	CCGCACUGUGGGUACUUGCUGC	-10.53
MIMAT0000062_MirBase_let-7a_microRNA	AUAAGAAACCUGCUUCAA	UGAGGUAGUAGGUUGUAUAGUU	-10.48
MIMAT0000415_MirBase_let-7i_microRNA	UCUUUACCAACCACCACAAACCUCUAU	UGAGGUAGUAGUUUGUGCUGUU	-10.45
MIMAT0000419_MirBase_miR-27b_microRNA	AAAGAACUUCACAACUGCUC	UUCACAGUGGCUAAGUUCUGC	-10.39
MIMAT0000063_MirBase_let-7b_microRNA	UUGUACUAAUUAUAUGCCUUAUUUCUU	UGAGGUAGUAGGUUGUGUGGUU	-10.36
MIMAT0000416_MirBase_miR-1_microRNA	CUUUACUUGCUUUACA	UGGAAUGUAAAGAAGUAUGUAU	-10.36
MIMAT0004767_MirBase_miR-193b*_microRNA	GCUCUCACUCAACAUGG	CGGGGUUUUGAGGGCGAGAUGA	-10.27
MIMAT0000063_MirBase_let-7b_microRNA	UUACAAACAAUUUGAUACUU	UGAGGUAGUAGGUUGUGUGGUU	-10.26
MIMAT0000067_MirBase_let-7f_microRNA	UUUACUCAACCGCUACUUUAGAC	UGAGGUAGUAGAUUGUAUAGUU	-10.21
MIMAT0000064_MirBase_let-7c_microRNA	UUACAAACAAUUUGAUACUU	UGAGGUAGUAGGUUGUAUGGUU	-10.17
MIMAT0000455_MirBase_miR-185_microRNA	CUGUCUUUAUUUCACCUUAUAAUU	UGGAGAGAAAGGCAGUUCCUGA	-10.13
MIMAT0003339_MirBase_miR-421_microRNA	UCUUGUCUGUUAAUC	AUCAACAGACAUUAAUUGGGCGC	-10.12
MIMAT0000226_MirBase_miR-196a_microRNA	UAAACGAACAUGAAAAUU	UAGGUAGUUUCAUGUUGUUGGG	-10.1
MIMAT0003254_MirBase_miR-548b-3p_microRNA	GAAGAGCAACCAAUG	CAAGAACCUCAGUUGCUUUUGU	-10.05
MIMAT0000063_MirBase_let-7b_microRNA	UUACCCACUUACUAAA	UGAGGUAGUAGGUUGUGUGGUU	-10.03
MIMAT0000066_MirBase_let-7e_microRNA	UCUUUACCAACCACCACAAACCUCUAU	UGAGGUAGGAGGUUGUAUAGUU	-9.92
MIMAT0004679_MirBase_miR-296-3p_microRNA	GCUCUCACUCAACAUGG	GAGGGUUGGGUGGAGGCUCUCC	-9.86
MIMAT0004949_MirBase_miR-877_microRNA	CUGUCUUUAUUUCACCUUAUAAUU	GUAGAGGAGAUGGCGCAGGG	-9.83
MIMAT0000414_MirBase_let-7g_microRNA	AUAAGAAACCUGCUUCAA	UGAGGUAGUAGUUUGUACAGUU	-9.8
MIMAT0000226_MirBase_miR-196a_microRNA	ACAACAUGUUAAAAACUGUUUA	UAGGUAGUUUCAUGUUGUUGGG	-9.75
MIMAT0003294_MirBase_miR-625_microRNA	AAAGAACUUCACAACUGCUC	AGGGGGAAAGUUCUAUAGUCC	-9.74
MIMAT0000617_MirBase_miR-200c_microRNA	ACUCAAUUACCCCCUGCA	UAAUACUGCCGGGUAAUGAUGGA	-9.73
MIMAT0000065_MirBase_let-7d_microRNA	AUAAGAAACCUGCUUCAA	AGAGGUAGUAGGUUGCAUAGUU	-9.72
MIMAT0000617_MirBase_miR-200c_microRNA	UUUAUUACCCUGACA	UAAUACUGCCGGGUAAUGAUGGA	-9.71
MIMAT0004949_MirBase_miR-877_microRNA	UAUUCUGUUAUUUACUUGUAC	GUAGAGGAGAUGGCGCAGGG	-9.66
MIMAT0004949_MirBase_miR-877_microRNA	UUGUACUAAUUAUAUGCCUUAUUUCUU	GUAGAGGAGAUGGCGCAGGG	-9.65
MIMAT0000415_MirBase_let-7i_microRNA	UUUACUCAACCGCUACUUUAGAC	UGAGGUAGUAGUUUGUGCUGUU	-9.61
MIMAT0000066_MirBase_let-7e_microRNA	UAACCUUAACUUGC	UGAGGUAGGAGGUUGUAUAGUU	-9.55
MIMAT0000281_MirBase_miR-224_microRNA	UUUACUCAACCGCUACUUUAGAC	CAAGUCACUAGUGGUUCCGUU	-9.47
MIMAT0000066_MirBase_let-7e_microRNA	AAUAAUUAAUCUUGUACAA	UGAGGUAGGAGGUUGUAUAGUU	-9.46
MIMAT0000693_MirBase_miR-30e*_microRNA	UAUUGAAUAUCCUAUAA	CUUUCAGUCGGAUGUUUACAGC	-9.45
MIMAT0000063_MirBase_let-7b_microRNA	ACCAAACCAACCAUAUCCAA	UGAGGUAGUAGGUUGUGUGGUU	-9.44
MIMAT0000063_MirBase_let-7b_microRNA	UAACCUUAACUUGC	UGAGGUAGUAGGUUGUGUGGUU	-9.42
MIMAT0000072_MirBase_miR-18a_microRNA	UUGUACUAAUUAUAUGCCUUAUUUCUU	UAAGGUGCAUCUAGUGCAGAUAG	-9.41
MIMAT0004672_MirBase_miR-106b*_microRNA	UUACCCACUUACUAAA	CCGCACUGUGGGUACUUGCUGC	-9.37
MIMAT0000064_MirBase_let-7c_microRNA	ACCAAACCAACCAUAUCCAA	UGAGGUAGUAGGUUGUAUGGUU	-9.35
MIMAT0000096_MirBase_miR-98_microRNA	UAAACAUAUAACUUCUA	UGAGGUAGUAAGUUGUAUUGUU	-9.35
MIMAT0004550_MirBase_miR-30c-2*_microRNA	CACAUGCUUUUCCA	CUGGGAGAAGGCUGUUUACUCU	-9.34
MIMAT0000064_MirBase_let-7c_microRNA	UAACCUUAACUUGC	UGAGGUAGUAGGUUGUAUGGUU	-9.33
MIMAT0000067_MirBase_let-7f_microRNA	UUACAAACAAUUUGAUACUU	UGAGGUAGUAGAUUGUAUAGUU	-9.29
MIMAT0000067_MirBase_let-7f_microRNA	AUAAGAAACCUGCUUCAA	UGAGGUAGUAGAUUGUAUAGUU	-9.29
MIMAT0000415_MirBase_let-7i_microRNA	AAAGAACUUCACAACUGCUC	UGAGGUAGUAGUUUGUGCUGUU	-9.29
MIMAT0000063_MirBase_let-7b_microRNA	AUAAACCUAUUGUU	UGAGGUAGUAGGUUGUGUGGUU	-9.27
MIMAT0000098_MirBase_miR-100_microRNA	CACAAGUCAAACAAAUUUACAAA	AACCCGUAGAUCCGAACUUGUG	-9.24
MIMAT0000261_MirBase_miR-183_microRNA	UCUUUACCAACCACCACAAACCUCUAU	UAUGGCACUGGUAGAAUUCACU	-9.22
MIMAT0000062_MirBase_let-7a_microRNA	UAAACAUAUAACUUCUA	UGAGGUAGUAGGUUGUAUAGUU	-9.18
MIMAT0000064_MirBase_let-7c_microRNA	AUAAACCUAUUGUU	UGAGGUAGUAGGUUGUAUGGUU	-9.18
MIMAT0000088_MirBase_miR-30a*_microRNA	UUACAAACAAUUUGAUACUU	CUUUCAGUCGGAUGUUUGCAGC	-9.18
MIMAT0000281_MirBase_miR-224_microRNA	ACAAUUGGAACUGUAACUUUG	CAAGUCACUAGUGGUUCCGUU	-9.17
MIMAT0000416_MirBase_miR-1_microRNA	UCUUUACCAACCACCACAAACCUCUAU	UGGAAUGUAAAGAAGUAUGUAU	-9.17
MIMAT0000096_MirBase_miR-98_microRNA	AUAAGAAACCUGCUUCAA	UGAGGUAGUAAGUUGUAUUGUU	-9.15
MIMAT0000689_MirBase_miR-99b_microRNA	AATGGGTGAATGATTT	CACCCGUAGAACCGACCUUGCG	-9.14
MIMAT0000259_MirBase_miR-182_microRNA	UCUUUACCAACCACCACAAACCUCUAU	UUUGGCAAUGGUAGAACUCACACU	-9.13
MIMAT0000062_MirBase_let-7a_microRNA	AUAAACCUAUUGUU	UGAGGUAGUAGGUUGUAUAGUU	-9.12
MIMAT0004694_MirBase_miR-342-5p_microRNA	UUAAAAAUUACAGAA	AGGGGUGCUAUCUGUGAUUGA	-9.12
MIMAT0000455_MirBase_miR-185_microRNA	CACAUGCUUUUCCA	UGGAGAGAAAGGCAGUUCCUGA	-9.08
MIMAT0000226_MirBase_miR-196a_microRNA	ACAAUUGGAACUGUAACUUUG	UAGGUAGUUUCAUGUUGUUGGG	-9.07
MIMAT0000226_MirBase_miR-196a_microRNA	UUUACUCAACCGCUACUUUAGAC	UAGGUAGUUUCAUGUUGUUGGG	-9.07
MIMAT0000104_MirBase_miR-107_microRNA	AAUAAUUAAUCUUGUACAA	AGCAGCAUUGUACAGGGCUAUCA	-9.03
MIMAT0000089_MirBase_miR-31_microRNA	UCUUGUCUGUUAAUC	AGGCAAGAUGCUGGCAUAGCU	-9
MIMAT0005892_MirBase_miR-1304_microRNA	GCUCUCACUCAACAUGG	UUUGAGGCUACAGUGAGAUGUG	-8.98
MIMAT0000226_MirBase_miR-196a_microRNA	AAAGAACUUCACAACUGCUC	UAGGUAGUUUCAUGUUGUUGGG	-8.95
MIMAT0000072_MirBase_miR-18a_microRNA	CUGUCUUUAUUUCACCUUAUAAUU	UAAGGUGCAUCUAGUGCAGAUAG	-8.9
MIMAT0004767_MirBase_miR-193b*_microRNA	CUGUCUUUAUUUCACCUUAUAAUU	CGGGGUUUUGAGGGCGAGAUGA	-8.89
MIMAT0000101_MirBase_miR-103_microRNA	AAUAAUUAAUCUUGUACAA	AGCAGCAUUGUACAGGGCUAUGA	-8.88
MIMAT0004678_MirBase_miR-99b*_microRNA	CCAUACCCACAAAUUUUAC	CAAGCUCGUGUCUGUGGGUCCG	-8.86
MIMAT0003297_MirBase_miR-628-3p_microRNA	AAAUGAUUGCUCAA	UCUAGUAAGAGUGGCAGUCGA	-8.85
MIMAT0004609_MirBase_miR-149*_microRNA	UCUUGUCUGUUAAUC	AGGGAGGGACGGGGGCUGUGC	-8.85
MIMAT0003339_MirBase_miR-421_microRNA	ACUCAAUUACCCCCUGCA	AUCAACAGACAUUAAUUGGGCGC	-8.84
MIMAT0004957_MirBase_miR-760_microRNA	ACUCAAUUACCCCCUGCA	CGGCUCUGGGUCUGUGGGGA	-8.83
MIMAT0000062_MirBase_let-7a_microRNA	UUACAAACAAUUUGAUACUU	UGAGGUAGUAGGUUGUAUAGUU	-8.81
MIMAT0004602_MirBase_miR-125a-3p_microRNA	GCUCUCACUCAACAUGG	ACAGGUGAGGUUCUUGGGAGCC	-8.77
MIMAT0000067_MirBase_let-7f_microRNA	UUUAUUACCCUGACA	UGAGGUAGUAGAUUGUAUAGUU	-8.76
MIMAT0000096_MirBase_miR-98_microRNA	UUACCCACUUACUAAA	UGAGGUAGUAAGUUGUAUUGUU	-8.75
MIMAT0004491_MirBase_miR-19b-1*_microRNA	AUAAGAAACCUGCUUCAA	AGUUUUGCAGGUUUGCAUCCAGC	-8.75
MIMAT0000250_MirBase_miR-139-5p_microRNA	AAACTATTTTTAGAGATACT	UCUACAGUGCACGUGUCUCCAG	-8.71
MIMAT0000252_MirBase_miR-7_microRNA	UUCCAAAAUCAUAA	UGGAAGACUAGUGAUUUUGUUGU	-8.71
MIMAT0003297_MirBase_miR-628-3p_microRNA	UUACCCACUUACUAAA	UCUAGUAAGAGUGGCAGUCGA	-8.7
MIMAT0005792_MirBase_miR-320b_microRNA	CUGUCUUUAUUUCACCUUAUAAUU	AAAAGCUGGGUUGAGAGGGCAA	-8.67
MIMAT0000438_MirBase_miR-152_microRNA	CAAGCUUUGUUAAA	UCAGUGCAUGACAGAACUUGG	-8.65
MIMAT0000064_MirBase_let-7c_microRNA	UUACCCACUUACUAAA	UGAGGUAGUAGGUUGUAUGGUU	-8.64
MIMAT0004597_MirBase_miR-140-3p_microRNA	UUUAUUACCCUGACA	UACCACAGGGUAGAACCACGG	-8.61
MIMAT0004773_MirBase_miR-500a_microRNA	GCUCUCACUCAACAUGG	UAAUCCUUGCUACCUGGGUGAGA	-8.6
MIMAT0003297_MirBase_miR-628-3p_microRNA	UGUCACUAAGAAAUCU	UCUAGUAAGAGUGGCAGUCGA	-8.59
MIMAT0000062_MirBase_let-7a_microRNA	UUACCCACUUACUAAA	UGAGGUAGUAGGUUGUAUAGUU	-8.58
MIMAT0000066_MirBase_let-7e_microRNA	UUGUGCAAACUUUA	UGAGGUAGGAGGUUGUAUAGUU	-8.58
MIMAT0000257_MirBase_miR-181b_microRNA	UUACCCACUUACUAAA	AACAUUCAUUGCUGUCGGUGGGU	-8.58
MIMAT0000617_MirBase_miR-200c_microRNA	UAUUCUGUUAUUUACUUGUAC	UAAUACUGCCGGGUAAUGAUGGA	-8.58
MIMAT0004673_MirBase_miR-29c*_microRNA	UGUCACUAAGAAAUCU	UGACCGAUUUCUCCUGGUGUUC	-8.57
MIMAT0004945_MirBase_miR-744_microRNA	ACUCAAUUACCCCCUGCA	UGCGGGGCUAGGGCUAACAGCA	-8.57
MIMAT0000104_MirBase_miR-107_microRNA	UGUAUUAAUGCUAAC	AGCAGCAUUGUACAGGGCUAUCA	-8.55
MIMAT0004507_MirBase_miR-92a-1*_microRNA	UUUACUCAACCGCUACUUUAGAC	AGGUUGGGAUCGGUUGCAAUGCU	-8.55
MIMAT0015031_MirBase_miR-3157_microRNA	UUGUACUAAUUAUAUGCCUUAUUUCUU	UUCAGCCAGGCUAGUGCAGUCU	-8.53
MIMAT0004496_MirBase_miR-23a*_microRNA	ACACCUAUCCUUCU	GGGGUUCCUGGGGAUGGGAUUU	-8.49
MIMAT0004602_MirBase_miR-125a-3p_microRNA	CUGUCUUUAUUUCACCUUAUAAUU	ACAGGUGAGGUUCUUGGGAGCC	-8.49
MIMAT0000281_MirBase_miR-224_microRNA	CCAAUGGAAAAACUCAA	CAAGUCACUAGUGGUUCCGUU	-8.47
MIMAT0000065_MirBase_let-7d_microRNA	AUAAACCUAUUGUU	AGAGGUAGUAGGUUGCAUAGUU	-8.46
MIMAT0000068_MirBase_miR-15a_microRNA	UCUUUACCAACCACCACAAACCUCUAU	UAGCAGCACAUAAUGGUUUGUG	-8.45
MIMAT0000088_MirBase_miR-30a*_microRNA	UUGUGCAAACUUUA	CUUUCAGUCGGAUGUUUGCAGC	-8.45
MIMAT0000461_MirBase_miR-195_microRNA	UUGUACUAAUUAUAUGCCUUAUUUCUU	UAGCAGCACAGAAAUAUUGGC	-8.45
MIMAT0004679_MirBase_miR-296-3p_microRNA	UUUACUCAACCGCUACUUUAGAC	GAGGGUUGGGUGGAGGCUCUCC	-8.45
MIMAT0004767_MirBase_miR-193b*_microRNA	UCUUGUCUGUUAAUC	CGGGGUUUUGAGGGCGAGAUGA	-8.44
MIMAT0000693_MirBase_miR-30e*_microRNA	GAGAAUUUGACUAAAG	CUUUCAGUCGGAUGUUUACAGC	-8.43
MIMAT0000423_MirBase_miR-125b_microRNA	CACAAGUCAAACAAAUUUACAAA	UCCCUGAGACCCUAACUUGUGA	-8.4
MIMAT0000066_MirBase_let-7e_microRNA	UUACAAACAAUUUGAUACUU	UGAGGUAGGAGGUUGUAUAGUU	-8.39
MIMAT0004748_MirBase_miR-423-5p_microRNA	CUUUACUUGCUUUACA	UGAGGGGCAGAGAGCGAGACUUU	-8.39
MIMAT0000101_MirBase_miR-103_microRNA	UGUAUUAAUGCUAAC	AGCAGCAUUGUACAGGGCUAUGA	-8.38
MIMAT0000083_MirBase_miR-26b_microRNA	UUAAAAAUCUGAAUUCUUC	UUCAAGUAAUUCAGGAUAGGU	-8.37
MIMAT0000088_MirBase_miR-30a*_microRNA	UAUUGAAUAUCCUAUAA	CUUUCAGUCGGAUGUUUGCAGC	-8.36
MIMAT0000415_MirBase_let-7i_microRNA	AUAAGAAACCUGCUUCAA	UGAGGUAGUAGUUUGUGCUGUU	-8.36
MIMAT0015072_MirBase_miR-320e_microRNA	UAACCUUAACUUGC	AAAGCUGGGUUGAGAAGG	-8.36
MIMAT0000414_MirBase_let-7g_microRNA	AAAGAACUUCACAACUGCUC	UGAGGUAGUAGUUUGUACAGUU	-8.33
MIMAT0000069_MirBase_miR-16_microRNA	AUUGUUUUUAUGUGUGUU	UAGCAGCACGUAAAUAUUGGCG	-8.32
MIMAT0004679_MirBase_miR-296-3p_microRNA	UCUUUACCAACCACCACAAACCUCUAU	GAGGGUUGGGUGGAGGCUCUCC	-8.32
MIMAT0000088_MirBase_miR-30a*_microRNA	GAGAAUUUGACUAAAG	CUUUCAGUCGGAUGUUUGCAGC	-8.29
MIMAT0000252_MirBase_miR-7_microRNA	CACAUGCUUUUCCA	UGGAAGACUAGUGAUUUUGUUGU	-8.28
MIMAT0000096_MirBase_miR-98_microRNA	UUUAUUACCCUGACA	UGAGGUAGUAAGUUGUAUUGUU	-8.24
MIMAT0004679_MirBase_miR-296-3p_microRNA	CUGUCUUUAUUUCACCUUAUAAUU	GAGGGUUGGGUGGAGGCUCUCC	-8.24
MIMAT0004491_MirBase_miR-19b-1*_microRNA	UUGUGCAAACUUUA	AGUUUUGCAGGUUUGCAUCCAGC	-8.22
MIMAT0004748_MirBase_miR-423-5p_microRNA	AUAAGAAACCUGCUUCAA	UGAGGGGCAGAGAGCGAGACUUU	-8.21
MIMAT0003294_MirBase_miR-625_microRNA	CACAUGCUUUUCCA	AGGGGGAAAGUUCUAUAGUCC	-8.2
MIMAT0003218_MirBase_miR-92b_microRNA	AATGGGTGAATGATTT	UAUUGCACUCGUCCCGGCCUCC	-8.18
MIMAT0005930_MirBase_miR-1276_microRNA	CUGUCUUUAUUUCACCUUAUAAUU	UAAAGAGCCCUGUGGAGACA	-8.18
MIMAT0000253_MirBase_miR-10a_microRNA	CACAAGUCAAACAAAUUUACAAA	UACCCUGUAGAUCCGAAUUUGUG	-8.17
MIMAT0000065_MirBase_let-7d_microRNA	UUGUACUAAUUAUAUGCCUUAUUUCUU	AGAGGUAGUAGGUUGCAUAGUU	-8.16
MIMAT0000067_MirBase_let-7f_microRNA	CUUUACUUGCUUUACA	UGAGGUAGUAGAUUGUAUAGUU	-8.16
MIMAT0005793_MirBase_miR-320c_microRNA	UAACCUUAACUUGC	AAAAGCUGGGUUGAGAGGGU	-8.16
MIMAT0003297_MirBase_miR-628-3p_microRNA	UAUUCUGUUAUUUACUUGUAC	UCUAGUAAGAGUGGCAGUCGA	-8.15
MIMAT0000063_MirBase_let-7b_microRNA	UUUAUUACCCUGACA	UGAGGUAGUAGGUUGUGUGGUU	-8.13
MIMAT0000065_MirBase_let-7d_microRNA	UUUAUUACCCUGACA	AGAGGUAGUAGGUUGCAUAGUU	-8.13
MIMAT0000262_MirBase_miR-187_microRNA	ACAAUUGGAACUGUAACUUUG	UCGUGUCUUGUGUUGCAGCCGG	-8.11
MIMAT0000278_MirBase_miR-221_microRNA	AUAAGAAACCUGCUUCAA	AGCUACAUUGUCUGCUGGGUUUC	-8.06
MIMAT0004767_MirBase_miR-193b*_microRNA	UCUUGAAACUGCUCAA	CGGGGUUUUGAGGGCGAGAUGA	-8.06
MIMAT0000064_MirBase_let-7c_microRNA	UUUAUUACCCUGACA	UGAGGUAGUAGGUUGUAUGGUU	-8.04
MIMAT0000510_MirBase_miR-320a_microRNA	CUGUCUUUAUUUCACCUUAUAAUU	AAAAGCUGGGUUGAGAGGGCGA	-8.04
MIMAT0003884_MirBase_miR-454*_microRNA	AAACTATTTTTAGAGATACT	ACCCUAUCAAUAUUGUCUCUGC	-8.03
MIMAT0000431_MirBase_miR-140-5p_microRNA	UUUACUCAACCGCUACUUUAGAC	CAGUGGUUUUACCCUAUGGUAG	-8.01
MIMAT0000418_MirBase_miR-23b_microRNA	GAAAUUAAAUUGGCAAA	AUCACAUUGCCAGGGAUUACC	-7.99
MIMAT0000062_MirBase_let-7a_microRNA	UUUAUUACCCUGACA	UGAGGUAGUAGGUUGUAUAGUU	-7.98
MIMAT0000084_MirBase_miR-27a_microRNA	ACAAUUGGAACUGUAACUUUG	UUCACAGUGGCUAAGUUCCGC	-7.98
MIMAT0000680_MirBase_miR-106b_microRNA	AUUUUUGUACUUGUUACU	UAAAGUGCUGACAGUGCAGAU	-7.97
MIMAT0000066_MirBase_let-7e_microRNA	CUUUACUUGCUUUACA	UGAGGUAGGAGGUUGUAUAGUU	-7.96
MIMAT0000461_MirBase_miR-195_microRNA	AUUUUUGUACUUGUUACU	UAGCAGCACAGAAAUAUUGGC	-7.96
MIMAT0004609_MirBase_miR-149*_microRNA	CUGUCUUUAUUUCACCUUAUAAUU	AGGGAGGGACGGGGGCUGUGC	-7.95
MIMAT0004776_MirBase_miR-505*_microRNA	UGUAUUAAUGCUAAC	GGGAGCCAGGAAGUAUUGAUGU	-7.95
MIMAT0004589_MirBase_miR-30b*_microRNA	UAAACAUAUAACUUCUA	CUGGGAGGUGGAUGUUUACUUC	-7.9
MIMAT0000104_MirBase_miR-107_microRNA	CAAGCUUUGUUAAA	AGCAGCAUUGUACAGGGCUAUCA	-7.89
MIMAT0002821_MirBase_miR-181d_microRNA	UUACCCACUUACUAAA	AACAUUCAUUGUUGUCGGUGGGU	-7.83
MIMAT0000067_MirBase_let-7f_microRNA	CUGUCUUUAUUUCACCUUAUAAUU	UGAGGUAGUAGAUUGUAUAGUU	-7.78
MIMAT0001412_MirBase_miR-18b_microRNA	UUGUACUAAUUAUAUGCCUUAUUUCUU	UAAGGUGCAUCUAGUGCAGUUAG	-7.78
MIMAT0000065_MirBase_let-7d_microRNA	UUGUGCAAACUUUA	AGAGGUAGUAGGUUGCAUAGUU	-7.75
MIMAT0000101_MirBase_miR-103_microRNA	CAAGCUUUGUUAAA	AGCAGCAUUGUACAGGGCUAUGA	-7.72
MIMAT0000450_MirBase_miR-149_microRNA	AATGGGTGAATGATTT	UCUGGCUCCGUGUCUUCACUCCC	-7.72
MIMAT0003239_MirBase_miR-574-3p_microRNA	AUUGUUUUUAUGUGUGUU	CACGCUCAUGCACACACCCACA	-7.72
MIMAT0003885_MirBase_miR-454_microRNA	UAUUGAAUAUCCUAUAA	UAGUGCAAUAUUGCUUAUAGGGU	-7.72
MIMAT0000103_MirBase_miR-106a_microRNA	UAUUCUGUUAUUUACUUGUAC	AAAAGUGCUUACAGUGCAGGUAG	-7.69
MIMAT0000070_MirBase_miR-17_microRNA	UAUUCUGUUAUUUACUUGUAC	CAAAGUGCUUACAGUGCAGGUAG	-7.68
MIMAT0000254_MirBase_miR-10b_microRNA	CCAUACCCACAAAUUUUAC	UACCCUGUAGAACCGAAUUUGUG	-7.68
MIMAT0000075_MirBase_miR-20a_microRNA	UAUUCUGUUAUUUACUUGUAC	UAAAGUGCUUAUAGUGCAGGUAG	-7.64
MIMAT0000083_MirBase_miR-26b_microRNA	UCUUGAAACUGCUCAA	UUCAAGUAAUUCAGGAUAGGU	-7.64
MIMAT0000096_MirBase_miR-98_microRNA	CUUUACUUGCUUUACA	UGAGGUAGUAAGUUGUAUUGUU	-7.64
MIMAT0000267_MirBase_miR-210_microRNA	CACAUGCUUUUCCA	CUGUGCGUGUGACAGCGGCUGA	-7.64
MIMAT0000751_MirBase_miR-330-3p_microRNA	AUUGUUUUUAUGUGUGUU	GCAAAGCACACGGCCUGCAGAGA	-7.64
MIMAT0000761_MirBase_miR-324-5p_microRNA	UUGUACUAAUUAUAUGCCUUAUUUCUU	CGCAUCCCCUAGGGCAUUGGUGU	-7.64
MIMAT0000104_MirBase_miR-107_microRNA	AUACAAUGUAACAC	AGCAGCAUUGUACAGGGCUAUCA	-7.63
MIMAT0000253_MirBase_miR-10a_microRNA	CCAUACCCACAAAUUUUAC	UACCCUGUAGAUCCGAAUUUGUG	-7.62
MIMAT0003885_MirBase_miR-454_microRNA	CUGUCUUUAUUUCACCUUAUAAUU	UAGUGCAAUAUUGCUUAUAGGGU	-7.61
MIMAT0000083_MirBase_miR-26b_microRNA	AUAAACCUAUUGUU	UUCAAGUAAUUCAGGAUAGGU	-7.59
MIMAT0000065_MirBase_let-7d_microRNA	AUUUUUGUACUUGUUACU	AGAGGUAGUAGGUUGCAUAGUU	-7.56
MIMAT0003294_MirBase_miR-625_microRNA	ACAAUUGGAACUGUAACUUUG	AGGGGGAAAGUUCUAUAGUCC	-7.56
MIMAT0018004_MirBase_miR-3622a-3p_microRNA	AATGGGTGAATGATTT	UCACCUGACCUCCCAUGCCUGU	-7.55
MIMAT0000063_MirBase_let-7b_microRNA	CUUUACUUGCUUUACA	UGAGGUAGUAGGUUGUGUGGUU	-7.53
MIMAT0004673_MirBase_miR-29c*_microRNA	CGAAUACCAUAAUGAAU	UGACCGAUUUCUCCUGGUGUUC	-7.51
MIMAT0004688_MirBase_miR-374a*_microRNA	UUAAAAAUCUGAAUUCUUC	CUUAUCAGAUUGUAUUGUAAUU	-7.5
MIMAT0000261_MirBase_miR-183_microRNA	UUAAAAAUCUGAAUUCUUC	UAUGGCACUGGUAGAAUUCACU	-7.49
MIMAT0004957_MirBase_miR-760_microRNA	AAAGAACUUCACAACUGCUC	CGGCUCUGGGUCUGUGGGGA	-7.49
MIMAT0000064_MirBase_let-7c_microRNA	CUUUACUUGCUUUACA	UGAGGUAGUAGGUUGUAUGGUU	-7.44
MIMAT0000101_MirBase_miR-103_microRNA	AUACAAUGUAACAC	AGCAGCAUUGUACAGGGCUAUGA	-7.43
MIMAT0001080_MirBase_miR-196b_microRNA	GCUCUCACUCAACAUGG	UAGGUAGUUUCCUGUUGUUGGG	-7.42
MIMAT0002876_MirBase_miR-505_microRNA	GAAAUUAAAUUGGCAAA	CGUCAACACUUGCUGGUUUCCU	-7.39
MIMAT0004609_MirBase_miR-149*_microRNA	CACAUGCUUUUCCA	AGGGAGGGACGGGGGCUGUGC	-7.39
MIMAT0000081_MirBase_miR-25_microRNA	AATGGGTGAATGATTT	CAUUGCACUUGUCUCGGUCUGA	-7.38
MIMAT0000062_MirBase_let-7a_microRNA	CUUUACUUGCUUUACA	UGAGGUAGUAGGUUGUAUAGUU	-7.36
MIMAT0000262_MirBase_miR-187_microRNA	AUACAAUGUAACAC	UCGUGUCUUGUGUUGCAGCCGG	-7.31
MIMAT0000075_MirBase_miR-20a_microRNA	UUGUACUAAUUAUAUGCCUUAUUUCUU	UAAAGUGCUUAUAGUGCAGGUAG	-7.3
MIMAT0005825_MirBase_miR-1180_microRNA	UUACCCACUUACUAAA	UUUCCGGCUCGCGUGGGUGUGU	-7.3
MIMAT0000063_MirBase_let-7b_microRNA	AUACAAUGUAACAC	UGAGGUAGUAGGUUGUGUGGUU	-7.28
MIMAT0000422_MirBase_miR-124_microRNA	AUUGUUUUUAUGUGUGUU	UAAGGCACGCGGUGAAUGCC	-7.28
MIMAT0001341_MirBase_miR-424_microRNA	UAAACGAACAUGAAAAUU	CAGCAGCAAUUCAUGUUUUGAA	-7.27
MIMAT0003242_MirBase_miR-577_microRNA	UUGUACUAAUUAUAUGCCUUAUUUCUU	UAGAUAAAAUAUUGGUACCUG	-7.27
MIMAT0000455_MirBase_miR-185_microRNA	AAAGAACUUCACAACUGCUC	UGGAGAGAAAGGCAGUUCCUGA	-7.26
MIMAT0005793_MirBase_miR-320c_microRNA	UAAUUCUUUCACAC	AAAAGCUGGGUUGAGAGGGU	-7.26
MIMAT0000065_MirBase_let-7d_microRNA	UUACCCACUUACUAAA	AGAGGUAGUAGGUUGCAUAGUU	-7.25
MIMAT0000252_MirBase_miR-7_microRNA	UGUCACUAAGAAAUCU	UGGAAGACUAGUGAUUUUGUUGU	-7.25
MIMAT0001080_MirBase_miR-196b_microRNA	UCUUGAAACUGCUCAA	UAGGUAGUUUCCUGUUGUUGGG	-7.22
MIMAT0000104_MirBase_miR-107_microRNA	UUGUGCAAACUUUA	AGCAGCAUUGUACAGGGCUAUCA	-7.2
MIMAT0000064_MirBase_let-7c_microRNA	AUACAAUGUAACAC	UGAGGUAGUAGGUUGUAUGGUU	-7.19
MIMAT0000415_MirBase_let-7i_microRNA	UUGUGCAAACUUUA	UGAGGUAGUAGUUUGUGCUGUU	-7.19
MIMAT0000065_MirBase_let-7d_microRNA	AUACAAUGUAACAC	AGAGGUAGUAGGUUGCAUAGUU	-7.18
MIMAT0000080_MirBase_miR-24_microRNA	AAUUUGCUGAUGAUU	UGGCUCAGUUCAGCAGGAACAG	-7.17
MIMAT0004697_MirBase_miR-151-5p_microRNA	CACAUGCUUUUCCA	UCGAGGAGCUCACAGUCUAGU	-7.16
MIMAT0000422_MirBase_miR-124_microRNA	UUGUACUAAUUAUAUGCCUUAUUUCUU	UAAGGCACGCGGUGAAUGCC	-7.14
MIMAT0004603_MirBase_miR-125b-2*_microRNA	GAGAAUUUGACUAAAG	UCACAAGUCAGGCUCUUGGGAC	-7.14
MIMAT0004688_MirBase_miR-374a*_microRNA	AAUUUGCUGAUGAUU	CUUAUCAGAUUGUAUUGUAAUU	-7.14
MIMAT0005892_MirBase_miR-1304_microRNA	AUAAGAAACCUGCUUCAA	UUUGAGGCUACAGUGAGAUGUG	-7.14
MIMAT0004748_MirBase_miR-423-5p_microRNA	AUUGUUUUUAUGUGUGUU	UGAGGGGCAGAGAGCGAGACUUU	-7.13
MIMAT0000062_MirBase_let-7a_microRNA	AUACAAUGUAACAC	UGAGGUAGUAGGUUGUAUAGUU	-7.11
MIMAT0000441_MirBase_miR-9_microRNA	GAGAAUUUGACUAAAG	UCUUUGGUUAUCUAGCUGUAUGA	-7.11
MIMAT0003294_MirBase_miR-625_microRNA	ACACCUAUCCUUCU	AGGGGGAAAGUUCUAUAGUCC	-7.11
MIMAT0000424_MirBase_miR-128_microRNA	AAUUUGCUGAUGAUU	UCACAGUGAACCGGUCUCUUU	-7.1
MIMAT0000430_MirBase_miR-138_microRNA	AAAGAACUUCACAACUGCUC	AGCUGGUGUUGUGAAUCAGGCCG	-7.1
MIMAT0000069_MirBase_miR-16_microRNA	UAUUCUGUUAUUUACUUGUAC	UAGCAGCACGUAAAUAUUGGCG	-7.09
MIMAT0000096_MirBase_miR-98_microRNA	AUACAAUGUAACAC	UGAGGUAGUAAGUUGUAUUGUU	-7.09
MIMAT0000456_MirBase_miR-186_microRNA	UUAAAAAUCUGAAUUCUUC	CAAAGAAUUCUCCUUUUGGGCU	-7.09
MIMAT0003242_MirBase_miR-577_microRNA	GAAGAGCAACCAAUG	UAGAUAAAAUAUUGGUACCUG	-7.09
MIMAT0004792_MirBase_miR-92b*_microRNA	UCUUGUCUGUUAAUC	AGGGACGGGACGCGGUGCAGUG	-7.09
MIMAT0000278_MirBase_miR-221_microRNA	AUACAAUGUAACAC	AGCUACAUUGUCUGCUGGGUUUC	-7.08
MIMAT0000703_MirBase_miR-361-5p_microRNA	AAUUUGCUGAUGAUU	UUAUCAGAAUCUCCAGGGGUAC	-7.07
MIMAT0000104_MirBase_miR-107_microRNA	AUUUUUGUACUUGUUACU	AGCAGCAUUGUACAGGGCUAUCA	-7.06
MIMAT0000101_MirBase_miR-103_microRNA	UUGUGCAAACUUUA	AGCAGCAUUGUACAGGGCUAUGA	-7.05
MIMAT0005792_MirBase_miR-320b_microRNA	UAACCUUAACUUGC	AAAAGCUGGGUUGAGAGGGCAA	-7.05
MIMAT0000510_MirBase_miR-320a_microRNA	UAACCUUAACUUGC	AAAAGCUGGGUUGAGAGGGCGA	-7.03
MIMAT0004748_MirBase_miR-423-5p_microRNA	CUGUCUUUAUUUCACCUUAUAAUU	UGAGGGGCAGAGAGCGAGACUUU	-7.03
MIMAT0000318_MirBase_miR-200b_microRNA	UUUAUUACCCUGACA	UAAUACUGCCUGGUAAUGAUGA	-7.02
MIMAT0000416_MirBase_miR-1_microRNA	UUGUACUAAUUAUAUGCCUUAUUUCUU	UGGAAUGUAAAGAAGUAUGUAU	-7.02
MIMAT0000089_MirBase_miR-31_microRNA	CUUUACUUGCUUUACA	AGGCAAGAUGCUGGCAUAGCU	-7.01
MIMAT0004748_MirBase_miR-423-5p_microRNA	CACAUGCUUUUCCA	UGAGGGGCAGAGAGCGAGACUUU	-7.01
MIMAT0000086_MirBase_miR-29a_microRNA	AAACTATTTTTAGAGATACT	UAGCACCAUCUGAAAUCGGUUA	-6.98
MIMAT0000222_MirBase_miR-192_microRNA	UCUUGUCUGUUAAUC	CUGACCUAUGAAUUGACAGCC	-6.98
MIMAT0004681_MirBase_miR-26a-2*_microRNA	UCAAGAAAUUCAAC	CCUAUUCUUGAUUACUUGUUUC	-6.98
MIMAT0000441_MirBase_miR-9_microRNA	AAUUUGCUGAUGAUU	UCUUUGGUUAUCUAGCUGUAUGA	-6.96
MIMAT0004602_MirBase_miR-125a-3p_microRNA	UAUUCUGUUAUUUACUUGUAC	ACAGGUGAGGUUCUUGGGAGCC	-6.96
MIMAT0005891_MirBase_miR-1303_microRNA	CUGUCUUUAUUUCACCUUAUAAUU	UUUAGAGACGGGGUCUUGCUCU	-6.96
MIMAT0003266_MirBase_miR-598_microRNA	AAUUUGCUGAUGAUU	UACGUCAUCGUUGUCAUCGUCA	-6.94
MIMAT0003297_MirBase_miR-628-3p_microRNA	AUUUUUGUACUUGUUACU	UCUAGUAAGAGUGGCAGUCGA	-6.94
MIMAT0003297_MirBase_miR-628-3p_microRNA	AAACTATTTTTAGAGATACT	UCUAGUAAGAGUGGCAGUCGA	-6.94
MIMAT0005797_MirBase_miR-1301_microRNA	GCUCUCACUCAACAUGG	UUGCAGCUGCCUGGGAGUGACUUC	-6.94
MIMAT0000254_MirBase_miR-10b_microRNA	CACAAGUCAAACAAAUUUACAAA	UACCCUGUAGAACCGAAUUUGUG	-6.93
MIMAT0003294_MirBase_miR-625_microRNA	GAGAAUUUGACUAAAG	AGGGGGAAAGUUCUAUAGUCC	-6.93
MIMAT0000093_MirBase_miR-93_microRNA	UAUUCUGUUAUUUACUUGUAC	CAAAGUGCUGUUCGUGCAGGUAG	-6.9
MIMAT0002872_MirBase_miR-501-5p_microRNA	UUACCCACUUACUAAA	AAUCCUUUGUCCCUGGGUGAGA	-6.9
MIMAT0000101_MirBase_miR-103_microRNA	AUUUUUGUACUUGUUACU	AGCAGCAUUGUACAGGGCUAUGA	-6.89
MIMAT0003339_MirBase_miR-421_microRNA	ACAAUUGGAACUGUAACUUUG	AUCAACAGACAUUAAUUGGGCGC	-6.89
MIMAT0005792_MirBase_miR-320b_microRNA	ACUCAAUUACCCCCUGCA	AAAAGCUGGGUUGAGAGGGCAA	-6.89
MIMAT0004680_MirBase_miR-130b*_microRNA	AUACAAUGUAACAC	ACUCUUUCCCUGUUGCACUAC	-6.88
MIMAT0000510_MirBase_miR-320a_microRNA	ACUCAAUUACCCCCUGCA	AAAAGCUGGGUUGAGAGGGCGA	-6.87
MIMAT0004819_MirBase_miR-671-3p_microRNA	GAGAAUUUGACUAAAG	UCCGGUUCUCAGGGCUCCACC	-6.87
MIMAT0015378_MirBase_miR-3065-3p_microRNA	UAUUGAAUAUCCUAUAA	UCAGCACCAGGAUAUUGUUGGAG	-6.85
MIMAT0002872_MirBase_miR-501-5p_microRNA	CUGUCUUUAUUUCACCUUAUAAUU	AAUCCUUUGUCCCUGGGUGAGA	-6.83
MIMAT0004767_MirBase_miR-193b*_microRNA	CUUUACUUGCUUUACA	CGGGGUUUUGAGGGCGAGAUGA	-6.83
MIMAT0000066_MirBase_let-7e_microRNA	ACAAUUGGAACUGUAACUUUG	UGAGGUAGGAGGUUGUAUAGUU	-6.82
MIMAT0000067_MirBase_let-7f_microRNA	AUACAAUGUAACAC	UGAGGUAGUAGAUUGUAUAGUU	-6.81
MIMAT0000083_MirBase_miR-26b_microRNA	AAACTATTTTTAGAGATACT	UUCAAGUAAUUCAGGAUAGGU	-6.81
MIMAT0001080_MirBase_miR-196b_microRNA	UUUACUCAACCGCUACUUUAGAC	UAGGUAGUUUCCUGUUGUUGGG	-6.81
MIMAT0002820_MirBase_miR-497_microRNA	UCUUUACCAACCACCACAAACCUCUAU	CAGCAGCACACUGUGGUUUGU	-6.81
MIMAT0004792_MirBase_miR-92b*_microRNA	CUGUCUUUAUUUCACCUUAUAAUU	AGGGACGGGACGCGGUGCAGUG	-6.81
MIMAT0000070_MirBase_miR-17_microRNA	ACAAUUGGAACUGUAACUUUG	CAAAGUGCUUACAGUGCAGGUAG	-6.8
MIMAT0003312_MirBase_miR-642a_microRNA	AAACTATTTTTAGAGATACT	GUCCCUCUCCAAAUGUGUCUUG	-6.79
MIMAT0005591_MirBase_miR-1236_microRNA	AAACTATTTTTAGAGATACT	CCUCUUCCCCUUGUCUCUCCAG	-6.79
MIMAT0000261_MirBase_miR-183_microRNA	AATGGGTGAATGATTT	UAUGGCACUGGUAGAAUUCACU	-6.78
MIMAT0015072_MirBase_miR-320e_microRNA	ACUCAAUUACCCCCUGCA	AAAGCUGGGUUGAGAAGG	-6.74
MIMAT0003239_MirBase_miR-574-3p_microRNA	AATGGGTGAATGATTT	CACGCUCAUGCACACACCCACA	-6.72
MIMAT0000261_MirBase_miR-183_microRNA	UUAGAUAUAUGAAUUCA	UAUGGCACUGGUAGAAUUCACU	-6.7
MIMAT0001080_MirBase_miR-196b_microRNA	AAAGAACUUCACAACUGCUC	UAGGUAGUUUCCUGUUGUUGGG	-6.69
MIMAT0003339_MirBase_miR-421_microRNA	AAAUGAUUGCUCAA	AUCAACAGACAUUAAUUGGGCGC	-6.69
MIMAT0000064_MirBase_let-7c_microRNA	CUGUCUUUAUUUCACCUUAUAAUU	UGAGGUAGUAGGUUGUAUGGUU	-6.68
MIMAT0000082_MirBase_miR-26a_microRNA	UCUUGUCUGUUAAUC	UUCAAGUAAUCCAGGAUAGGCU	-6.68
MIMAT0000689_MirBase_miR-99b_microRNA	AUUGUUUUUAUGUGUGUU	CACCCGUAGAACCGACCUUGCG	-6.64
MIMAT0003312_MirBase_miR-642a_microRNA	UUAGAUAUAUGAAUUCA	GUCCCUCUCCAAAUGUGUCUUG	-6.64
MIMAT0011163_MirBase_miR-548q_microRNA	AUUUUUGUACUUGUUACU	GCUGGUGCAAAAGUAAUGGCGG	-6.64
MIMAT0005930_MirBase_miR-1276_microRNA	UUUAAUUUUUCACAAAUAUUAC	UAAAGAGCCCUGUGGAGACA	-6.63
MIMAT0000066_MirBase_let-7e_microRNA	UUUGAUAAAAAUCUCUAUGA	UGAGGUAGGAGGUUGUAUAGUU	-6.62
MIMAT0000419_MirBase_miR-27b_microRNA	GAGAAUUUGACUAAAG	UUCACAGUGGCUAAGUUCUGC	-6.61
MIMAT0004589_MirBase_miR-30b*_microRNA	AUCCAUCAAAACCA	CUGGGAGGUGGAUGUUUACUUC	-6.61
MIMAT0000414_MirBase_let-7g_microRNA	UUUAUUACCCUGACA	UGAGGUAGUAGUUUGUACAGUU	-6.6
MIMAT0000083_MirBase_miR-26b_microRNA	CUGUCUUUAUUUCACCUUAUAAUU	UUCAAGUAAUUCAGGAUAGGU	-6.59
MIMAT0004555_MirBase_miR-10a*_microRNA	UUAGAUAUAUGAAUUCA	CAAAUUCGUAUCUAGGGGAAUA	-6.59
MIMAT0004602_MirBase_miR-125a-3p_microRNA	UAACCUUAACUUGC	ACAGGUGAGGUUCUUGGGAGCC	-6.59
MIMAT0000067_MirBase_let-7f_microRNA	AAUUUGCUGAUGAUU	UGAGGUAGUAGAUUGUAUAGUU	-6.58
MIMAT0004776_MirBase_miR-505*_microRNA	CACAUGCUUUUCCA	GGGAGCCAGGAAGUAUUGAUGU	-6.58
MIMAT0007882_MirBase_miR-1909*_microRNA	GAAAUUAAAUUGGCAAA	UGAGUGCCGGUGCCUGCCCUG	-6.58
MIMAT0000707_MirBase_miR-363_microRNA	UUGUGCAAACUUUA	AAUUGCACGGUAUCCAUCUGUA	-6.57
MIMAT0000065_MirBase_let-7d_microRNA	UUACAAACAAUUUGAUACUU	AGAGGUAGUAGGUUGCAUAGUU	-6.56
MIMAT0015072_MirBase_miR-320e_microRNA	CTTTAATTTAACCGTTT	AAAGCUGGGUUGAGAAGG	-6.56
MIMAT0000440_MirBase_miR-191_microRNA	CUUUACUUGCUUUACA	CAACGGAAUCCCAAAAGCAGCUG	-6.54
MIMAT0000443_MirBase_miR-125a-5p_microRNA	UUAAAAAGUUGAAGAA	UCCCUGAGACCCUUUAACCUGUGA	-6.54
MIMAT0005793_MirBase_miR-320c_microRNA	ACUCAAUUACCCCCUGCA	AAAAGCUGGGUUGAGAGGGU	-6.54
MIMAT0002871_MirBase_miR-500a*_microRNA	UCUUGUCUGUUAAUC	AUGCACCUGGGCAAGGAUUCUG	-6.53
MIMAT0004694_MirBase_miR-342-5p_microRNA	UUGUACUAAUUAUAUGCCUUAUUUCUU	AGGGGUGCUAUCUGUGAUUGA	-6.53
MIMAT0004957_MirBase_miR-760_microRNA	UCUUUACCAACCACCACAAACCUCUAU	CGGCUCUGGGUCUGUGGGGA	-6.53
MIMAT0001080_MirBase_miR-196b_microRNA	UUUAUUACCCUGACA	UAGGUAGUUUCCUGUUGUUGGG	-6.52
MIMAT0000068_MirBase_miR-15a_microRNA	AUUGUUUUUAUGUGUGUU	UAGCAGCACAUAAUGGUUUGUG	-6.51
MIMAT0000250_MirBase_miR-139-5p_microRNA	AUUGUUUUUAUGUGUGUU	UCUACAGUGCACGUGUCUCCAG	-6.51
MIMAT0005792_MirBase_miR-320b_microRNA	CTTTAATTTAACCGTTT	AAAAGCUGGGUUGAGAGGGCAA	-6.51
MIMAT0000416_MirBase_miR-1_microRNA	CUGUCUUUAUUUCACCUUAUAAUU	UGGAAUGUAAAGAAGUAUGUAU	-6.5
MIMAT0004679_MirBase_miR-296-3p_microRNA	UUACCCACUUACUAAA	GAGGGUUGGGUGGAGGCUCUCC	-6.5
MIMAT0004792_MirBase_miR-92b*_microRNA	UUGUACUAAUUAUAUGCCUUAUUUCUU	AGGGACGGGACGCGGUGCAGUG	-6.5
MIMAT0000510_MirBase_miR-320a_microRNA	CTTTAATTTAACCGTTT	AAAAGCUGGGUUGAGAGGGCGA	-6.49
MIMAT0000318_MirBase_miR-200b_microRNA	AAUCAUCAUCUAAA	UAAUACUGCCUGGUAAUGAUGA	-6.48
MIMAT0000077_MirBase_miR-22_microRNA	GAAAUUAAAUUGGCAAA	AAGCUGCCAGUUGAAGAACUGU	-6.47
MIMAT0000438_MirBase_miR-152_microRNA	UCUUGUCUGUUAAUC	UCAGUGCAUGACAGAACUUGG	-6.47
MIMAT0003339_MirBase_miR-421_microRNA	UUGUACUAAUUAUAUGCCUUAUUUCUU	AUCAACAGACAUUAAUUGGGCGC	-6.47
MIMAT0000078_MirBase_miR-23a_microRNA	UUUGAUAAAAAUCUCUAUGA	AUCACAUUGCCAGGGAUUUCC	-6.46
MIMAT0000693_MirBase_miR-30e*_microRNA	AACACGTTTGAAAT	CUUUCAGUCGGAUGUUUACAGC	-6.46
MIMAT0003885_MirBase_miR-454_microRNA	UUGUACUAAUUAUAUGCCUUAUUUCUU	UAGUGCAAUAUUGCUUAUAGGGU	-6.46
MIMAT0005825_MirBase_miR-1180_microRNA	ACACCUAUCCUUCU	UUUCCGGCUCGCGUGGGUGUGU	-6.46
MIMAT0000085_MirBase_miR-28-5p_microRNA	CCAAUGGAAAAACUCAA	AAGGAGCUCACAGUCUAUUGAG	-6.43
MIMAT0000693_MirBase_miR-30e*_microRNA	UUACAAACAAUUUGAUACUU	CUUUCAGUCGGAUGUUUACAGC	-6.43
MIMAT0000063_MirBase_let-7b_microRNA	CACAAGUCAAACAAAUUUACAAA	UGAGGUAGUAGGUUGUGUGGUU	-6.42
MIMAT0000101_MirBase_miR-103_microRNA	UAUUCUGUUAUUUACUUGUAC	AGCAGCAUUGUACAGGGCUAUGA	-6.42
MIMAT0000096_MirBase_miR-98_microRNA	UAACCUUAACUUGC	UGAGGUAGUAAGUUGUAUUGUU	-6.41
MIMAT0000103_MirBase_miR-106a_microRNA	CUUUACUUGCUUUACA	AAAAGUGCUUACAGUGCAGGUAG	-6.41
MIMAT0002871_MirBase_miR-500a*_microRNA	AAAUGAUUGCUCAA	AUGCACCUGGGCAAGGAUUCUG	-6.41
MIMAT0000062_MirBase_let-7a_microRNA	UUGUGCAAACUUUA	UGAGGUAGUAGGUUGUAUAGUU	-6.4
MIMAT0000070_MirBase_miR-17_microRNA	CUUUACUUGCUUUACA	CAAAGUGCUUACAGUGCAGGUAG	-6.4
MIMAT0000065_MirBase_let-7d_microRNA	ACAAUUGGAACUGUAACUUUG	AGAGGUAGUAGGUUGCAUAGUU	-6.39
MIMAT0000075_MirBase_miR-20a_microRNA	CUUUACUUGCUUUACA	UAAAGUGCUUAUAGUGCAGGUAG	-6.39
MIMAT0000414_MirBase_let-7g_microRNA	UAAUAUUACAAACU	UGAGGUAGUAGUUUGUACAGUU	-6.39
MIMAT0000414_MirBase_let-7g_microRNA	UCUUGAAACUGCUCAA	UGAGGUAGUAGUUUGUACAGUU	-6.39
MIMAT0000422_MirBase_miR-124_microRNA	CUUUACUUGCUUUACA	UAAGGCACGCGGUGAAUGCC	-6.39
MIMAT0004767_MirBase_miR-193b*_microRNA	UGUCACUAAGAAAUCU	CGGGGUUUUGAGGGCGAGAUGA	-6.39
MIMAT0005891_MirBase_miR-1303_microRNA	GAAGAGCAACCAAUG	UUUAGAGACGGGGUCUUGCUCU	-6.39
MIMAT0000067_MirBase_let-7f_microRNA	UUGUGCAAACUUUA	UGAGGUAGUAGAUUGUAUAGUU	-6.38
MIMAT0004515_MirBase_miR-29b-2*_microRNA	AUUGUUUUUAUGUGUGUU	CUGGUUUCACAUGGUGGCUUAG	-6.38
MIMAT0000090_MirBase_miR-32_microRNA	UUGUGCAAACUUUA	UAUUGCACAUUACUAAGUUGCA	-6.37
MIMAT0000226_MirBase_miR-196a_microRNA	CCAAUGGAAAAACUCAA	UAGGUAGUUUCAUGUUGUUGGG	-6.37
MIMAT0004949_MirBase_miR-877_microRNA	UUUGAUAAAAAUCUCUAUGA	GUAGAGGAGAUGGCGCAGGG	-6.37
MIMAT0000064_MirBase_let-7c_microRNA	CACAAGUCAAACAAAUUUACAAA	UGAGGUAGUAGGUUGUAUGGUU	-6.36
MIMAT0000096_MirBase_miR-98_microRNA	AAUUUGCUGAUGAUU	UGAGGUAGUAAGUUGUAUUGUU	-6.36
MIMAT0005930_MirBase_miR-1276_microRNA	UUUGAUAAAAAUCUCUAUGA	UAAAGAGCCCUGUGGAGACA	-6.36
MIMAT0000414_MirBase_let-7g_microRNA	ACAAUUGGAACUGUAACUUUG	UGAGGUAGUAGUUUGUACAGUU	-6.35
MIMAT0000083_MirBase_miR-26b_microRNA	UAAAAUGAAUUAUC	UUCAAGUAAUUCAGGAUAGGU	-6.34
MIMAT0005793_MirBase_miR-320c_microRNA	CTTTAATTTAACCGTTT	AAAAGCUGGGUUGAGAGGGU	-6.33
MIMAT0001341_MirBase_miR-424_microRNA	UUAGAUAUAUGAAUUCA	CAGCAGCAAUUCAUGUUUUGAA	-6.32
MIMAT0000089_MirBase_miR-31_microRNA	AAUAAUUAAUCUUGUACAA	AGGCAAGAUGCUGGCAUAGCU	-6.31
MIMAT0000417_MirBase_miR-15b_microRNA	AUUGUUUUUAUGUGUGUU	UAGCAGCACAUCAUGGUUUACA	-6.31
MIMAT0004602_MirBase_miR-125a-3p_microRNA	GAGAAUUUGACUAAAG	ACAGGUGAGGUUCUUGGGAGCC	-6.31
MIMAT0000226_MirBase_miR-196a_microRNA	ACUCAAUUACCCCCUGCA	UAGGUAGUUUCAUGUUGUUGGG	-6.3
MIMAT0005892_MirBase_miR-1304_microRNA	CUGUCUUUAUUUCACCUUAUAAUU	UUUGAGGCUACAGUGAGAUGUG	-6.29
MIMAT0000096_MirBase_miR-98_microRNA	AUUUUUGUACUUGUUACU	UGAGGUAGUAAGUUGUAUUGUU	-6.28
MIMAT0000727_MirBase_miR-374a_microRNA	AUUUUUGUACUUGUUACU	UUAUAAUACAACCUGAUAAGUG	-6.28
MIMAT0000063_MirBase_let-7b_microRNA	AUUUUUGUACUUGUUACU	UGAGGUAGUAGGUUGUGUGGUU	-6.27
MIMAT0001412_MirBase_miR-18b_microRNA	CUGUCUUUAUUUCACCUUAUAAUU	UAAGGUGCAUCUAGUGCAGUUAG	-6.27
MIMAT0000062_MirBase_let-7a_microRNA	UAACCUUAACUUGC	UGAGGUAGUAGGUUGUAUAGUU	-6.26
MIMAT0011163_MirBase_miR-548q_microRNA	UAUUCUGUUAUUUACUUGUAC	GCUGGUGCAAAAGUAAUGGCGG	-6.26
MIMAT0000063_MirBase_let-7b_microRNA	AAUUUGCUGAUGAUU	UGAGGUAGUAGGUUGUGUGGUU	-6.25
MIMAT0000455_MirBase_miR-185_microRNA	UCUUGAAACUGCUCAA	UGGAGAGAAAGGCAGUUCCUGA	-6.22
MIMAT0004810_MirBase_miR-629_microRNA	AUAAACCUAUUGUU	UGGGUUUACGUUGGGAGAACU	-6.22
MIMAT0000072_MirBase_miR-18a_microRNA	AUUUUUGUACUUGUUACU	UAAGGUGCAUCUAGUGCAGAUAG	-6.21
MIMAT0000431_MirBase_miR-140-5p_microRNA	AATGGGTGAATGATTT	CAGUGGUUUUACCCUAUGGUAG	-6.21
MIMAT0003258_MirBase_miR-590-5p_microRNA	AUUUUUGUACUUGUUACU	GAGCUUAUUCAUAAAAGUGCAG	-6.21
MIMAT0000416_MirBase_miR-1_microRNA	AUUUUUGUACUUGUUACU	UGGAAUGUAAAGAAGUAUGUAU	-6.2
MIMAT0001618_MirBase_miR-191*_microRNA	UCAAGAAAUUCAAC	GCUGCGCUUGGAUUUCGUCCCC	-6.19
MIMAT0004688_MirBase_miR-374a*_microRNA	UUUUACAAUUAAUUG	CUUAUCAGAUUGUAUUGUAAUU	-6.19
MIMAT0000064_MirBase_let-7c_microRNA	AUUUUUGUACUUGUUACU	UGAGGUAGUAGGUUGUAUGGUU	-6.18
MIMAT0003339_MirBase_miR-421_microRNA	UCUUGAAACUGCUCAA	AUCAACAGACAUUAAUUGGGCGC	-6.18
MIMAT0000063_MirBase_let-7b_microRNA	CUGUCUUUAUUUCACCUUAUAAUU	UGAGGUAGUAGGUUGUGUGGUU	-6.17
MIMAT0000088_MirBase_miR-30a*_microRNA	AACACGTTTGAAAT	CUUUCAGUCGGAUGUUUGCAGC	-6.17
MIMAT0000761_MirBase_miR-324-5p_microRNA	GAAGAGCAACCAAUG	CGCAUCCCCUAGGGCAUUGGUGU	-6.17
MIMAT0002820_MirBase_miR-497_microRNA	ACCAAACCAACCAUAUCCAA	CAGCAGCACACUGUGGUUUGU	-6.17
MIMAT0002888_MirBase_miR-532-5p_microRNA	UUUACUCAACCGCUACUUUAGAC	CAUGCCUUGAGUGUAGGACCGU	-6.17
MIMAT0000064_MirBase_let-7c_microRNA	AAUUUGCUGAUGAUU	UGAGGUAGUAGGUUGUAUGGUU	-6.16
MIMAT0004985_MirBase_miR-942_microRNA	GAAATGAACGAAATGT	UCUUCUCUGUUUUGGCCAUGUG	-6.15
MIMAT0000440_MirBase_miR-191_microRNA	CACAUGCUUUUCCA	CAACGGAAUCCCAAAAGCAGCUG	-6.13
MIMAT0004568_MirBase_miR-221*_microRNA	AUUGUUUUUAUGUGUGUU	ACCUGGCAUACAAUGUAGAUUU	-6.12
MIMAT0004767_MirBase_miR-193b*_microRNA	UUUACUCAACCGCUACUUUAGAC	CGGGGUUUUGAGGGCGAGAUGA	-6.12
MIMAT0005927_MirBase_miR-1274a_microRNA	AACACGTTTGAAAT	GUCCCUGUUCAGGCGCCA	-6.12
MIMAT0000093_MirBase_miR-93_microRNA	CUUUACUUGCUUUACA	CAAAGUGCUGUUCGUGCAGGUAG	-6.11
MIMAT0000414_MirBase_let-7g_microRNA	AAUAAUUAAUCUUGUACAA	UGAGGUAGUAGUUUGUACAGUU	-6.11
MIMAT0000440_MirBase_miR-191_microRNA	UAUUCUGUUAUUUACUUGUAC	CAACGGAAUCCCAAAAGCAGCUG	-6.11
MIMAT0015378_MirBase_miR-3065-3p_microRNA	UAUUCUGUUAUUUACUUGUAC	UCAGCACCAGGAUAUUGUUGGAG	-6.11
MIMAT0000062_MirBase_let-7a_microRNA	AAUUUGCUGAUGAUU	UGAGGUAGUAGGUUGUAUAGUU	-6.1
MIMAT0000062_MirBase_let-7a_microRNA	AUUUUUGUACUUGUUACU	UGAGGUAGUAGGUUGUAUAGUU	-6.1
MIMAT0000066_MirBase_let-7e_microRNA	AUACAAUGUAACAC	UGAGGUAGGAGGUUGUAUAGUU	-6.1
MIMAT0004589_MirBase_miR-30b*_microRNA	UAUUGAAUAUCCUAUAA	CUGGGAGGUGGAUGUUUACUUC	-6.1
MIMAT0004819_MirBase_miR-671-3p_microRNA	ACAAUUGGAACUGUAACUUUG	UCCGGUUCUCAGGGCUCCACC	-6.09
MIMAT0000066_MirBase_let-7e_microRNA	CUGUCUUUAUUUCACCUUAUAAUU	UGAGGUAGGAGGUUGUAUAGUU	-6.08
MIMAT0000259_MirBase_miR-182_microRNA	AUAAACCUAUUGUU	UUUGGCAAUGGUAGAACUCACACU	-6.08
MIMAT0000691_MirBase_miR-130b_microRNA	AAUCAUCAUCUAAA	CAGUGCAAUGAUGAAAGGGCAU	-6.08
MIMAT0004589_MirBase_miR-30b*_microRNA	CUGUCUUUAUUUCACCUUAUAAUU	CUGGGAGGUGGAUGUUUACUUC	-6.08
MIMAT0000083_MirBase_miR-26b_microRNA	CUUUACUUGCUUUACA	UUCAAGUAAUUCAGGAUAGGU	-6.07
MIMAT0000455_MirBase_miR-185_microRNA	UAAUUCUUUCACAC	UGGAGAGAAAGGCAGUUCCUGA	-6.07
MIMAT0000068_MirBase_miR-15a_microRNA	ACCAAACCAACCAUAUCCAA	UAGCAGCACAUAAUGGUUUGUG	-6.05
MIMAT0000088_MirBase_miR-30a*_microRNA	UAAACGAACAUGAAAAUU	CUUUCAGUCGGAUGUUUGCAGC	-6.05
MIMAT0004486_MirBase_let-7f-1*_microRNA	CCAAUGGAAAAACUCAA	CUAUACAAUCUAUUGCCUUCCC	-6.04
MIMAT0005930_MirBase_miR-1276_microRNA	AUUGUUUUUAUGUGUGUU	UAAAGAGCCCUGUGGAGACA	-6.04
MIMAT0000414_MirBase_let-7g_microRNA	UUACAAACAAUUUGAUACUU	UGAGGUAGUAGUUUGUACAGUU	-6.03
MIMAT0004597_MirBase_miR-140-3p_microRNA	ACACCUAUCCUUCU	UACCACAGGGUAGAACCACGG	-6.03
MIMAT0004984_MirBase_miR-941_microRNA	AUUGUUUUUAUGUGUGUU	CACCCGGCUGUGUGCACAUGUGC	-6.03
MIMAT0016847_MirBase_miR-378c_microRNA	CACAUGCUUUUCCA	ACUGGACUUGGAGUCAGAAGAGUGG	-6.03
MIMAT0000078_MirBase_miR-23a_microRNA	UGUCACUAAGAAAUCU	AUCACAUUGCCAGGGAUUUCC	-6.02
MIMAT0000083_MirBase_miR-26b_microRNA	UCUUGUCUGUUAAUC	UUCAAGUAAUUCAGGAUAGGU	-6.02
MIMAT0000461_MirBase_miR-195_microRNA	AUUGUUUUUAUGUGUGUU	UAGCAGCACAGAAAUAUUGGC	-6.01
MIMAT0000104_MirBase_miR-107_microRNA	UAUUCUGUUAUUUACUUGUAC	AGCAGCAUUGUACAGGGCUAUCA	-5.99
MIMAT0000065_MirBase_let-7d_microRNA	UAUUCUGUUAUUUACUUGUAC	AGAGGUAGUAGGUUGCAUAGUU	-5.98
MIMAT0000226_MirBase_miR-196a_microRNA	UUUAUUACCCUGACA	UAGGUAGUUUCAUGUUGUUGGG	-5.98
MIMAT0000072_MirBase_miR-18a_microRNA	UGUAUUAAUGCUAAC	UAAGGUGCAUCUAGUGCAGAUAG	-5.96
MIMAT0000415_MirBase_let-7i_microRNA	UUUAAUUUUUCACAAAUAUUAC	UGAGGUAGUAGUUUGUGCUGUU	-5.96
MIMAT0009196_MirBase_miR-103-2*_microRNA	ACAAUUGGAACUGUAACUUUG	AGCUUCUUUACAGUGCUGCCUUG	-5.96
MIMAT0018205_MirBase_miR-3928_microRNA	AUAAGAAACCUGCUUCAA	GGAGGAACCUUGGAGCUUCGGC	-5.96
MIMAT0000460_MirBase_miR-194_microRNA	AUUUUUGUACUUGUUACU	UGUAACAGCAACUCCAUGUGGA	-5.94
MIMAT0000761_MirBase_miR-324-5p_microRNA	UGUAUUAAUGCUAAC	CGCAUCCCCUAGGGCAUUGGUGU	-5.94
MIMAT0005901_MirBase_miR-1249_microRNA	UUAAAAAGUUGAAGAA	ACGCCCUUCCCCCCCUUCUUCA	-5.94
MIMAT0000252_MirBase_miR-7_microRNA	UAAUUCUUUCACAC	UGGAAGACUAGUGAUUUUGUUGU	-5.93
MIMAT0000082_MirBase_miR-26a_microRNA	AAAUGAUUGCUCAA	UUCAAGUAAUCCAGGAUAGGCU	-5.92
MIMAT0002871_MirBase_miR-500a*_microRNA	CUUUACUUGCUUUACA	AUGCACCUGGGCAAGGAUUCUG	-5.92
MIMAT0004589_MirBase_miR-30b*_microRNA	CACAUGCUUUUCCA	CUGGGAGGUGGAUGUUUACUUC	-5.91
MIMAT0000082_MirBase_miR-26a_microRNA	CUGUCUUUAUUUCACCUUAUAAUU	UUCAAGUAAUCCAGGAUAGGCU	-5.9
MIMAT0003242_MirBase_miR-577_microRNA	UGUAUUAAUGCUAAC	UAGAUAAAAUAUUGGUACCUG	-5.9
MIMAT0005825_MirBase_miR-1180_microRNA	ACCAAACCAACCAUAUCCAA	UUUCCGGCUCGCGUGGGUGUGU	-5.9
MIMAT0003885_MirBase_miR-454_microRNA	UAUUCUGUUAUUUACUUGUAC	UAGUGCAAUAUUGCUUAUAGGGU	-5.88
MIMAT0015072_MirBase_miR-320e_microRNA	AAUAAUUAAUCUUGUACAA	AAAGCUGGGUUGAGAAGG	-5.87
MIMAT0000068_MirBase_miR-15a_microRNA	AUAAACCUAUUGUU	UAGCAGCACAUAAUGGUUUGUG	-5.86
MIMAT0000617_MirBase_miR-200c_microRNA	AAAUGAUUGCUCAA	UAAUACUGCCGGGUAAUGAUGGA	-5.86
MIMAT0000078_MirBase_miR-23a_microRNA	UCAAGAAAUUCAAC	AUCACAUUGCCAGGGAUUUCC	-5.85
MIMAT0000242_MirBase_miR-129-5p_microRNA	CAAGCUUUGUUAAA	CUUUUUGCGGUCUGGGCUUGC	-5.85
MIMAT0000082_MirBase_miR-26a_microRNA	CUUUACUUGCUUUACA	UUCAAGUAAUCCAGGAUAGGCU	-5.84
MIMAT0004496_MirBase_miR-23a*_microRNA	CUGUCUUUAUUUCACCUUAUAAUU	GGGGUUCCUGGGGAUGGGAUUU	-5.84
MIMAT0003885_MirBase_miR-454_microRNA	UUUGAUAAAAAUCUCUAUGA	UAGUGCAAUAUUGCUUAUAGGGU	-5.83
MIMAT0002888_MirBase_miR-532-5p_microRNA	UAUUGAAUAUCCUAUAA	CAUGCCUUGAGUGUAGGACCGU	-5.82
MIMAT0005892_MirBase_miR-1304_microRNA	UUUACUCAACCGCUACUUUAGAC	UUUGAGGCUACAGUGAGAUGUG	-5.82
MIMAT0004602_MirBase_miR-125a-3p_microRNA	AUUUUUGUACUUGUUACU	ACAGGUGAGGUUCUUGGGAGCC	-5.81
MIMAT0000252_MirBase_miR-7_microRNA	UUAAAAAUUACAGAA	UGGAAGACUAGUGAUUUUGUUGU	-5.8
MIMAT0000693_MirBase_miR-30e*_microRNA	UAAACAUAUAACUUCUA	CUUUCAGUCGGAUGUUUACAGC	-5.8
MIMAT0000414_MirBase_let-7g_microRNA	CUUUACUUGCUUUACA	UGAGGUAGUAGUUUGUACAGUU	-5.79
MIMAT0004602_MirBase_miR-125a-3p_microRNA	CUUUACUUGCUUUACA	ACAGGUGAGGUUCUUGGGAGCC	-5.79
MIMAT0005891_MirBase_miR-1303_microRNA	UUUACUCAACCGCUACUUUAGAC	UUUAGAGACGGGGUCUUGCUCU	-5.79
MIMAT0002891_MirBase_miR-18a*_microRNA	AUUUUUGUACUUGUUACU	ACUGCCCUAAGUGCUCCUUCUGG	-5.77
MIMAT0000415_MirBase_let-7i_microRNA	CCAUACCCACAAAUUUUAC	UGAGGUAGUAGUUUGUGCUGUU	-5.76
MIMAT0000460_MirBase_miR-194_microRNA	UAUUCUGUUAUUUACUUGUAC	UGUAACAGCAACUCCAUGUGGA	-5.76
MIMAT0005891_MirBase_miR-1303_microRNA	CAAGCUUUGUUAAA	UUUAGAGACGGGGUCUUGCUCU	-5.75
MIMAT0000414_MirBase_let-7g_microRNA	AUUUUUGUACUUGUUACU	UGAGGUAGUAGUUUGUACAGUU	-5.73
MIMAT0002820_MirBase_miR-497_microRNA	UUAAAAAUUACAGAA	CAGCAGCACACUGUGGUUUGU	-5.73
MIMAT0015031_MirBase_miR-3157_microRNA	AUUUUUGUACUUGUUACU	UUCAGCCAGGCUAGUGCAGUCU	-5.73
MIMAT0000065_MirBase_let-7d_microRNA	UAACCUUAACUUGC	AGAGGUAGUAGGUUGCAUAGUU	-5.72
MIMAT0000243_MirBase_miR-148a_microRNA	AUUUUUGUACUUGUUACU	UCAGUGCACUACAGAACUUUGU	-5.72
MIMAT0000459_MirBase_miR-193a-3p_microRNA	CAAGCUUUGUUAAA	AACUGGCCUACAAAGUCCCAGU	-5.72
MIMAT0002820_MirBase_miR-497_microRNA	AUUGUUUUUAUGUGUGUU	CAGCAGCACACUGUGGUUUGU	-5.72
MIMAT0004767_MirBase_miR-193b*_microRNA	AAUAAUUAAUCUUGUACAA	CGGGGUUUUGAGGGCGAGAUGA	-5.72
MIMAT0001080_MirBase_miR-196b_microRNA	ACAAUUGGAACUGUAACUUUG	UAGGUAGUUUCCUGUUGUUGGG	-5.71
MIMAT0016847_MirBase_miR-378c_microRNA	UUUACUCAACCGCUACUUUAGAC	ACUGGACUUGGAGUCAGAAGAGUGG	-5.71
MIMAT0000103_MirBase_miR-106a_microRNA	AAUAAUUAAUCUUGUACAA	AAAAGUGCUUACAGUGCAGGUAG	-5.7
MIMAT0004945_MirBase_miR-744_microRNA	CAAGCUUUGUUAAA	UGCGGGGCUAGGGCUAACAGCA	-5.7
MIMAT0004985_MirBase_miR-942_microRNA	UUCCAAAAUCAUAA	UCUUCUCUGUUUUGGCCAUGUG	-5.7
MIMAT0000070_MirBase_miR-17_microRNA	AAUAAUUAAUCUUGUACAA	CAAAGUGCUUACAGUGCAGGUAG	-5.69
MIMAT0000075_MirBase_miR-20a_microRNA	AAUAAUUAAUCUUGUACAA	UAAAGUGCUUAUAGUGCAGGUAG	-5.69
MIMAT0000456_MirBase_miR-186_microRNA	GAGAAUUUGACUAAAG	CAAAGAAUUCUCCUUUUGGGCU	-5.69
MIMAT0002874_MirBase_miR-503_microRNA	ACAAUUGGAACUGUAACUUUG	UAGCAGCGGGAACAGUUCUGCAG	-5.69
MIMAT0004502_MirBase_miR-28-3p_microRNA	AAAGAACUUCACAACUGCUC	CACUAGAUUGUGAGCUCCUGGA	-5.69
MIMAT0000256_MirBase_miR-181a_microRNA	AAUUUGCUGAUGAUU	AACAUUCAACGCUGUCGGUGAGU	-5.68
MIMAT0000265_MirBase_miR-204_microRNA	GAAAUUAAAUUGGCAAA	UUCCCUUUGUCAUCCUAUGCCU	-5.67
MIMAT0000691_MirBase_miR-130b_microRNA	UUGUACUAAUUAUAUGCCUUAUUUCUU	CAGUGCAAUGAUGAAAGGGCAU	-5.67
MIMAT0003301_MirBase_miR-33b_microRNA	AUACAAUGUAACAC	GUGCAUUGCUGUUGCAUUGC	-5.67
MIMAT0005793_MirBase_miR-320c_microRNA	AAUAAUUAAUCUUGUACAA	AAAAGCUGGGUUGAGAGGGU	-5.67
MIMAT0000751_MirBase_miR-330-3p_microRNA	CAAGCUUUGUUAAA	GCAAAGCACACGGCCUGCAGAGA	-5.65
MIMAT0000703_MirBase_miR-361-5p_microRNA	ACACCUAUCCUUCU	UUAUCAGAAUCUCCAGGGGUAC	-5.63
MIMAT0004809_MirBase_miR-628-5p_microRNA	AATGGGTGAATGATTT	AUGCUGACAUAUUUACUAGAGG	-5.63
MIMAT0005577_MirBase_miR-1226_microRNA	UAAACGAACAUGAAAAUU	UCACCAGCCCUGUGUUCCCUAG	-5.63
MIMAT0000222_MirBase_miR-192_microRNA	UCAAUUUAAACACC	CUGACCUAUGAAUUGACAGCC	-5.62
MIMAT0000414_MirBase_let-7g_microRNA	CUGUCUUUAUUUCACCUUAUAAUU	UGAGGUAGUAGUUUGUACAGUU	-5.62
MIMAT0004810_MirBase_miR-629_microRNA	AUACAAUGUAACAC	UGGGUUUACGUUGGGAGAACU	-5.62
MIMAT0000062_MirBase_let-7a_microRNA	CUGUCUUUAUUUCACCUUAUAAUU	UGAGGUAGUAGGUUGUAUAGUU	-5.61
MIMAT0000067_MirBase_let-7f_microRNA	UAUUCUGUUAUUUACUUGUAC	UGAGGUAGUAGAUUGUAUAGUU	-5.61
MIMAT0000419_MirBase_miR-27b_microRNA	ACAAUUGGAACUGUAACUUUG	UUCACAGUGGCUAAGUUCUGC	-5.61
MIMAT0004493_MirBase_miR-20a*_microRNA	CGAAUACCAUAAUGAAU	ACUGCAUUAUGAGCACUUAAAG	-5.61
MIMAT0000418_MirBase_miR-23b_microRNA	UUUGAUAAAAAUCUCUAUGA	AUCACAUUGCCAGGGAUUACC	-5.6
MIMAT0002809_MirBase_miR-146b-5p_microRNA	UUAGAUAUAUGAAUUCA	UGAGAACUGAAUUCCAUAGGCU	-5.6
MIMAT0004958_MirBase_miR-301b_microRNA	AUUUUUGUACUUGUUACU	CAGUGCAAUGAUAUUGUCAAAGC	-5.6
MIMAT0000067_MirBase_let-7f_microRNA	UUUUACAAUUAAUUG	UGAGGUAGUAGAUUGUAUAGUU	-5.59
MIMAT0000254_MirBase_miR-10b_microRNA	UUAGAUAUAUGAAUUCA	UACCCUGUAGAACCGAAUUUGUG	-5.59
MIMAT0004983_MirBase_miR-940_microRNA	AUAAGAAACCUGCUUCAA	AAGGCAGGGCCCCCGCUCCCC	-5.59
MIMAT0004985_MirBase_miR-942_microRNA	ACAACAUGUUAAAAACUGUUUA	UCUUCUCUGUUUUGGCCAUGUG	-5.59
MIMAT0000096_MirBase_miR-98_microRNA	CACAAGUCAAACAAAUUUACAAA	UGAGGUAGUAAGUUGUAUUGUU	-5.58
MIMAT0000252_MirBase_miR-7_microRNA	GAAATGAACGAAATGT	UGGAAGACUAGUGAUUUUGUUGU	-5.58
MIMAT0000254_MirBase_miR-10b_microRNA	UUUAAUUUUUCACAAAUAUUAC	UACCCUGUAGAACCGAAUUUGUG	-5.58
MIMAT0000093_MirBase_miR-93_microRNA	UAAACGAACAUGAAAAUU	CAAAGUGCUGUUCGUGCAGGUAG	-5.57
MIMAT0004688_MirBase_miR-374a*_microRNA	UUUGAUAAAAAUCUCUAUGA	CUUAUCAGAUUGUAUUGUAAUU	-5.57
MIMAT0000242_MirBase_miR-129-5p_microRNA	ACAAUUGGAACUGUAACUUUG	CUUUUUGCGGUCUGGGCUUGC	-5.56
MIMAT0004565_MirBase_miR-218-1*_microRNA	ACAAUUGGAACUGUAACUUUG	AUGGUUCCGUCAAGCACCAUGG	-5.56
MIMAT0000065_MirBase_let-7d_microRNA	CUUUACUUGCUUUACA	AGAGGUAGUAGGUUGCAUAGUU	-5.55
MIMAT0000253_MirBase_miR-10a_microRNA	UUAGAUAUAUGAAUUCA	UACCCUGUAGAUCCGAAUUUGUG	-5.55
MIMAT0000427_MirBase_miR-133a_microRNA	UUAAAAAGUUGAAGAA	UUUGGUCCCCUUCAACCAGCUG	-5.54
MIMAT0004502_MirBase_miR-28-3p_microRNA	UUUAAUUUUUCACAAAUAUUAC	CACUAGAUUGUGAGCUCCUGGA	-5.53
MIMAT0000253_MirBase_miR-10a_microRNA	UUUAAUUUUUCACAAAUAUUAC	UACCCUGUAGAUCCGAAUUUGUG	-5.51
MIMAT0016847_MirBase_miR-378c_microRNA	UUAAAAAUCUGAAUUCUUC	ACUGGACUUGGAGUCAGAAGAGUGG	-5.5
MIMAT0000088_MirBase_miR-30a*_microRNA	UUUAAUUUUUCACAAAUAUUAC	CUUUCAGUCGGAUGUUUGCAGC	-5.49
MIMAT0000431_MirBase_miR-140-5p_microRNA	CGAAUACCAUAAUGAAU	CAGUGGUUUUACCCUAUGGUAG	-5.49
MIMAT0003339_MirBase_miR-421_microRNA	UUUUACAAUUAAUUG	AUCAACAGACAUUAAUUGGGCGC	-5.49
MIMAT0000067_MirBase_let-7f_microRNA	CACAAGUCAAACAAAUUUACAAA	UGAGGUAGUAGAUUGUAUAGUU	-5.48
MIMAT0000252_MirBase_miR-7_microRNA	CCAAUGGAAAAACUCAA	UGGAAGACUAGUGAUUUUGUUGU	-5.48
MIMAT0000415_MirBase_let-7i_microRNA	UAAUAUUACAAACU	UGAGGUAGUAGUUUGUGCUGUU	-5.47
MIMAT0000259_MirBase_miR-182_microRNA	AAUUUGCUGAUGAUU	UUUGGCAAUGGUAGAACUCACACU	-5.46
MIMAT0014979_MirBase_miR-3117_microRNA	UUAGAUAUAUGAAUUCA	AUAGGACUCAUAUAGUGCCAG	-5.46
MIMAT0000092_MirBase_miR-92a_microRNA	AATGGGTGAATGATTT	UAUUGCACUUGUCCCGGCCUGU	-5.45
MIMAT0000259_MirBase_miR-182_microRNA	CAAGCUUUGUUAAA	UUUGGCAAUGGUAGAACUCACACU	-5.45
MIMAT0005930_MirBase_miR-1276_microRNA	UAAUUCUUUCACAC	UAAAGAGCCCUGUGGAGACA	-5.45
MIMAT0000065_MirBase_let-7d_microRNA	AAUUUGCUGAUGAUU	AGAGGUAGUAGGUUGCAUAGUU	-5.44
MIMAT0000255_MirBase_miR-34a_microRNA	GAAGAGCAACCAAUG	UGGCAGUGUCUUAGCUGGUUGU	-5.43
MIMAT0000455_MirBase_miR-185_microRNA	CUUUACUUGCUUUACA	UGGAGAGAAAGGCAGUUCCUGA	-5.42
MIMAT0000425_MirBase_miR-130a_microRNA	UUGUACUAAUUAUAUGCCUUAUUUCUU	CAGUGCAAUGUUAAAAGGGCAU	-5.41
MIMAT0004507_MirBase_miR-92a-1*_microRNA	ACAAUUGGAACUGUAACUUUG	AGGUUGGGAUCGGUUGCAAUGCU	-5.41
MIMAT0000103_MirBase_miR-106a_microRNA	AUUUUUGUACUUGUUACU	AAAAGUGCUUACAGUGCAGGUAG	-5.39
MIMAT0004776_MirBase_miR-505*_microRNA	UUACAAACAAUUUGAUACUU	GGGAGCCAGGAAGUAUUGAUGU	-5.39
MIMAT0000070_MirBase_miR-17_microRNA	AUUUUUGUACUUGUUACU	CAAAGUGCUUACAGUGCAGGUAG	-5.38
MIMAT0000091_MirBase_miR-33a_microRNA	AUACAAUGUAACAC	GUGCAUUGUAGUUGCAUUGCA	-5.38
MIMAT0004688_MirBase_miR-374a*_microRNA	GAGAAUUUGACUAAAG	CUUAUCAGAUUGUAUUGUAAUU	-5.38
MIMAT0004773_MirBase_miR-500a_microRNA	UUACCCACUUACUAAA	UAAUCCUUGCUACCUGGGUGAGA	-5.37
MIMAT0002804_MirBase_miR-488*_microRNA	UCUUGUCUGUUAAUC	CCCAGAUAAUGGCACUCUCAA	-5.36
MIMAT0000076_MirBase_miR-21_microRNA	AAUUUGCUGAUGAUU	UAGCUUAUCAGACUGAUGUUGA	-5.35
MIMAT0000088_MirBase_miR-30a*_microRNA	UAAACAUAUAACUUCUA	CUUUCAGUCGGAUGUUUGCAGC	-5.35
MIMAT0014979_MirBase_miR-3117_microRNA	UUGUACUAAUUAUAUGCCUUAUUUCUU	AUAGGACUCAUAUAGUGCCAG	-5.35
MIMAT0000067_MirBase_let-7f_microRNA	UCAAUUUAAACACC	UGAGGUAGUAGAUUGUAUAGUU	-5.34
MIMAT0000703_MirBase_miR-361-5p_microRNA	UUUGAUAAAAAUCUCUAUGA	UUAUCAGAAUCUCCAGGGGUAC	-5.34
MIMAT0002871_MirBase_miR-500a*_microRNA	UUAAAAAUCUGAAUUCUUC	AUGCACCUGGGCAAGGAUUCUG	-5.34
MIMAT0004693_MirBase_miR-330-5p_microRNA	AAACTATTTTTAGAGATACT	UCUCUGGGCCUGUGUCUUAGGC	-5.34
MIMAT0004958_MirBase_miR-301b_microRNA	UUGUACUAAUUAUAUGCCUUAUUUCUU	CAGUGCAAUGAUAUUGUCAAAGC	-5.33
MIMAT0004767_MirBase_miR-193b*_microRNA	ACAAUUGGAACUGUAACUUUG	CGGGGUUUUGAGGGCGAGAUGA	-5.32
MIMAT0004773_MirBase_miR-500a_microRNA	CUGUCUUUAUUUCACCUUAUAAUU	UAAUCCUUGCUACCUGGGUGAGA	-5.32
MIMAT0000103_MirBase_miR-106a_microRNA	ACAAUUGGAACUGUAACUUUG	AAAAGUGCUUACAGUGCAGGUAG	-5.31
MIMAT0004792_MirBase_miR-92b*_microRNA	AUUUUUGUACUUGUUACU	AGGGACGGGACGCGGUGCAGUG	-5.3
MIMAT0004550_MirBase_miR-30c-2*_microRNA	AATGGGTGAATGATTT	CUGGGAGAAGGCUGUUUACUCU	-5.29
MIMAT0000262_MirBase_miR-187_microRNA	AAACTATTTTTAGAGATACT	UCGUGUCUUGUGUUGCAGCCGG	-5.28
MIMAT0004491_MirBase_miR-19b-1*_microRNA	UCUUUACCAACCACCACAAACCUCUAU	AGUUUUGCAGGUUUGCAUCCAGC	-5.27
MIMAT0003258_MirBase_miR-590-5p_microRNA	AATGGGTGAATGATTT	GAGCUUAUUCAUAAAAGUGCAG	-5.25
MIMAT0004515_MirBase_miR-29b-2*_microRNA	ACAAUUGGAACUGUAACUUUG	CUGGUUUCACAUGGUGGCUUAG	-5.25
MIMAT0005930_MirBase_miR-1276_microRNA	UCUUUACCAACCACCACAAACCUCUAU	UAAAGAGCCCUGUGGAGACA	-5.25
MIMAT0000062_MirBase_let-7a_microRNA	ACAAUUGGAACUGUAACUUUG	UGAGGUAGUAGGUUGUAUAGUU	-5.24
MIMAT0004612_MirBase_miR-186*_microRNA	CUGUCUUUAUUUCACCUUAUAAUU	GCCCAAAGGUGAAUUUUUUGGG	-5.24
MIMAT0004819_MirBase_miR-671-3p_microRNA	CAAGCUUUGUUAAA	UCCGGUUCUCAGGGCUCCACC	-5.23
MIMAT0001080_MirBase_miR-196b_microRNA	ACUCAAUUACCCCCUGCA	UAGGUAGUUUCCUGUUGUUGGG	-5.22
MIMAT0000075_MirBase_miR-20a_microRNA	AUUUUUGUACUUGUUACU	UAAAGUGCUUAUAGUGCAGGUAG	-5.21
MIMAT0003242_MirBase_miR-577_microRNA	UCUUGUCUGUUAAUC	UAGAUAAAAUAUUGGUACCUG	-5.21
MIMAT0005891_MirBase_miR-1303_microRNA	UCUUGUCUGUUAAUC	UUUAGAGACGGGGUCUUGCUCU	-5.21
MIMAT0005892_MirBase_miR-1304_microRNA	AACACGTTTGAAAT	UUUGAGGCUACAGUGAGAUGUG	-5.21
MIMAT0004688_MirBase_miR-374a*_microRNA	AUACAAUGUAACAC	CUUAUCAGAUUGUAUUGUAAUU	-5.2
MIMAT0000064_MirBase_let-7c_microRNA	UUUUACAAUUAAUUG	UGAGGUAGUAGGUUGUAUGGUU	-5.19
MIMAT0000091_MirBase_miR-33a_microRNA	AAAGAACUUCACAACUGCUC	GUGCAUUGUAGUUGCAUUGCA	-5.19
MIMAT0000281_MirBase_miR-224_microRNA	AAAGAACUUCACAACUGCUC	CAAGUCACUAGUGGUUCCGUU	-5.19
MIMAT0004776_MirBase_miR-505*_microRNA	UUGUACUAAUUAUAUGCCUUAUUUCUU	GGGAGCCAGGAAGUAUUGAUGU	-5.19
MIMAT0000068_MirBase_miR-15a_microRNA	CTTTAATTTAACCGTTT	UAGCAGCACAUAAUGGUUUGUG	-5.18
MIMAT0000449_MirBase_miR-146a_microRNA	AUAAACCUAUUGUU	UGAGAACUGAAUUCCAUGGGUU	-5.18
MIMAT0000067_MirBase_let-7f_microRNA	AAUAAUUAAUCUUGUACAA	UGAGGUAGUAGAUUGUAUAGUU	-5.17
MIMAT0000082_MirBase_miR-26a_microRNA	AAACTATTTTTAGAGATACT	UUCAAGUAAUCCAGGAUAGGCU	-5.17
MIMAT0000096_MirBase_miR-98_microRNA	UCAAUUUAAACACC	UGAGGUAGUAAGUUGUAUUGUU	-5.15
MIMAT0005930_MirBase_miR-1276_microRNA	CUUUACUUGCUUUACA	UAAAGAGCCCUGUGGAGACA	-5.15
MIMAT0015072_MirBase_miR-320e_microRNA	UCAAUUUAAACACC	AAAGCUGGGUUGAGAAGG	-5.14
MIMAT0000062_MirBase_let-7a_microRNA	UAUUCUGUUAUUUACUUGUAC	UGAGGUAGUAGGUUGUAUAGUU	-5.13
MIMAT0000062_MirBase_let-7a_microRNA	UUUUACAAUUAAUUG	UGAGGUAGUAGGUUGUAUAGUU	-5.13
MIMAT0000065_MirBase_let-7d_microRNA	AAACTATTTTTAGAGATACT	AGAGGUAGUAGGUUGCAUAGUU	-5.13
MIMAT0000617_MirBase_miR-200c_microRNA	AAUCAUCAUCUAAA	UAAUACUGCCGGGUAAUGAUGGA	-5.13
MIMAT0004602_MirBase_miR-125a-3p_microRNA	UCAAGAAAUUCAAC	ACAGGUGAGGUUCUUGGGAGCC	-5.13
MIMAT0004767_MirBase_miR-193b*_microRNA	UUUGAUAAAAAUCUCUAUGA	CGGGGUUUUGAGGGCGAGAUGA	-5.13
MIMAT0000063_MirBase_let-7b_microRNA	AAACTATTTTTAGAGATACT	UGAGGUAGUAGGUUGUGUGGUU	-5.12
MIMAT0000252_MirBase_miR-7_microRNA	UUUGAUAAAAAUCUCUAUGA	UGGAAGACUAGUGAUUUUGUUGU	-5.12
MIMAT0004955_MirBase_miR-374b_microRNA	UGUAUUAAUGCUAAC	AUAUAAUACAACCUGCUAAGUG	-5.11
MIMAT0014979_MirBase_miR-3117_microRNA	AUUGUUUUUAUGUGUGUU	AUAGGACUCAUAUAGUGCCAG	-5.11
MIMAT0000096_MirBase_miR-98_microRNA	UUUUACAAUUAAUUG	UGAGGUAGUAAGUUGUAUUGUU	-5.1
MIMAT0004985_MirBase_miR-942_microRNA	AUCCAUCAAAACCA	UCUUCUCUGUUUUGGCCAUGUG	-5.1
MIMAT0016847_MirBase_miR-378c_microRNA	GAGAAUUUGACUAAAG	ACUGGACUUGGAGUCAGAAGAGUGG	-5.1
MIMAT0000062_MirBase_let-7a_microRNA	AAUAAUUAAUCUUGUACAA	UGAGGUAGUAGGUUGUAUAGUU	-5.09
MIMAT0000278_MirBase_miR-221_microRNA	AUAAACCUAUUGUU	AGCUACAUUGUCUGCUGGGUUUC	-5.09
MIMAT0000727_MirBase_miR-374a_microRNA	UGUAUUAAUGCUAAC	UUAUAAUACAACCUGAUAAGUG	-5.09
MIMAT0002821_MirBase_miR-181d_microRNA	AAUUUGCUGAUGAUU	AACAUUCAUUGUUGUCGGUGGGU	-5.09
MIMAT0004602_MirBase_miR-125a-3p_microRNA	UGUCACUAAGAAAUCU	ACAGGUGAGGUUCUUGGGAGCC	-5.09
MIMAT0000064_MirBase_let-7c_microRNA	UUGUGCAAACUUUA	UGAGGUAGUAGGUUGUAUGGUU	-5.06
MIMAT0000415_MirBase_let-7i_microRNA	UUUAUUACCCUGACA	UGAGGUAGUAGUUUGUGCUGUU	-5.06
MIMAT0000450_MirBase_miR-149_microRNA	AAACTATTTTTAGAGATACT	UCUGGCUCCGUGUCUUCACUCCC	-5.06
MIMAT0004507_MirBase_miR-92a-1*_microRNA	UAACCUUAACUUGC	AGGUUGGGAUCGGUUGCAAUGCU	-5.06
MIMAT0000063_MirBase_let-7b_microRNA	UUAAAAAUUACAGAA	UGAGGUAGUAGGUUGUGUGGUU	-5.04
MIMAT0004957_MirBase_miR-760_microRNA	UUUGAUAAAAAUCUCUAUGA	CGGCUCUGGGUCUGUGGGGA	-5.04
MIMAT0005792_MirBase_miR-320b_microRNA	CACAUGCUUUUCCA	AAAAGCUGGGUUGAGAGGGCAA	-5.04
MIMAT0000063_MirBase_let-7b_microRNA	UCAAUUUAAACACC	UGAGGUAGUAGGUUGUGUGGUU	-5.03
MIMAT0000064_MirBase_let-7c_microRNA	AAACTATTTTTAGAGATACT	UGAGGUAGUAGGUUGUAUGGUU	-5.03
MIMAT0002820_MirBase_miR-497_microRNA	UUGUGCAAACUUUA	CAGCAGCACACUGUGGUUUGU	-5.03
MIMAT0000066_MirBase_let-7e_microRNA	UCUUGUCUGUUAAUC	UGAGGUAGGAGGUUGUAUAGUU	-5.02
MIMAT0000067_MirBase_let-7f_microRNA	CTTTAATTTAACCGTTT	UGAGGUAGUAGAUUGUAUAGUU	-5.02
MIMAT0000431_MirBase_miR-140-5p_microRNA	AAAGAACUUCACAACUGCUC	CAGUGGUUUUACCCUAUGGUAG	-5.01
MIMAT0000431_MirBase_miR-140-5p_microRNA	UCUUGAAACUGCUCAA	CAGUGGUUUUACCCUAUGGUAG	-5.01
MIMAT0000510_MirBase_miR-320a_microRNA	UAAUUCUUUCACAC	AAAAGCUGGGUUGAGAGGGCGA	-5.01
MIMAT0004568_MirBase_miR-221*_microRNA	CACAAGUCAAACAAAUUUACAAA	ACCUGGCAUACAAUGUAGAUUU	-5.01
MIMAT0000062_MirBase_let-7a_microRNA	CACAAGUCAAACAAAUUUACAAA	UGAGGUAGUAGGUUGUAUAGUU	-5
MIMAT0000255_MirBase_miR-34a_microRNA	AAACTATTTTTAGAGATACT	UGGCAGUGUCUUAGCUGGUUGU	-5
MIMAT0003885_MirBase_miR-454_microRNA	AUUUUUGUACUUGUUACU	UAGUGCAAUAUUGCUUAUAGGGU	-5
MIMAT0004694_MirBase_miR-342-5p_microRNA	UUCCAAAAUCAUAA	AGGGGUGCUAUCUGUGAUUGA	-5
MIMAT0000456_MirBase_miR-186_microRNA	UAAUUCUUUCACAC	CAAAGAAUUCUCCUUUUGGGCU	-4.99
MIMAT0003884_MirBase_miR-454*_microRNA	AUACAAUGUAACAC	ACCCUAUCAAUAUUGUCUCUGC	-4.99
MIMAT0004748_MirBase_miR-423-5p_microRNA	CAAGCUUUGUUAAA	UGAGGGGCAGAGAGCGAGACUUU	-4.99
MIMAT0004810_MirBase_miR-629_microRNA	UAAUUCUUUCACAC	UGGGUUUACGUUGGGAGAACU	-4.99
MIMAT0000067_MirBase_let-7f_microRNA	AAACTATTTTTAGAGATACT	UGAGGUAGUAGAUUGUAUAGUU	-4.98
MIMAT0000095_MirBase_miR-96_microRNA	AUUGUUUUUAUGUGUGUU	UUUGGCACUAGCACAUUUUUGCU	-4.98
MIMAT0005938_MirBase_miR-1274b_microRNA	AACACGTTTGAAAT	UCCCUGUUCGGGCGCCA	-4.98
MIMAT0000062_MirBase_let-7a_microRNA	AAACTATTTTTAGAGATACT	UGAGGUAGUAGGUUGUAUAGUU	-4.97
MIMAT0000680_MirBase_miR-106b_microRNA	UUGUACUAAUUAUAUGCCUUAUUUCUU	UAAAGUGCUGACAGUGCAGAU	-4.97
MIMAT0004555_MirBase_miR-10a*_microRNA	GAGAAUUUGACUAAAG	CAAAUUCGUAUCUAGGGGAAUA	-4.96
MIMAT0005792_MirBase_miR-320b_microRNA	UAAUUCUUUCACAC	AAAAGCUGGGUUGAGAGGGCAA	-4.96
MIMAT0005793_MirBase_miR-320c_microRNA	UCAAUUUAAACACC	AAAAGCUGGGUUGAGAGGGU	-4.96
MIMAT0000707_MirBase_miR-363_microRNA	AATGGGTGAATGATTT	AAUUGCACGGUAUCCAUCUGUA	-4.95
MIMAT0004488_MirBase_miR-15a*_microRNA	AUACAAUGUAACAC	CAGGCCAUAUUGUGCUGCCUCA	-4.95
MIMAT0000265_MirBase_miR-204_microRNA	UUUGAUAAAAAUCUCUAUGA	UUCCCUUUGUCAUCCUAUGCCU	-4.94
MIMAT0000064_MirBase_let-7c_microRNA	UCAAUUUAAACACC	UGAGGUAGUAGGUUGUAUGGUU	-4.92
MIMAT0004589_MirBase_miR-30b*_microRNA	AUAAGAAACCUGCUUCAA	CUGGGAGGUGGAUGUUUACUUC	-4.92
MIMAT0004748_MirBase_miR-423-5p_microRNA	UAUUCUGUUAUUUACUUGUAC	UGAGGGGCAGAGAGCGAGACUUU	-4.92
MIMAT0000415_MirBase_let-7i_microRNA	ACAAUUGGAACUGUAACUUUG	UGAGGUAGUAGUUUGUGCUGUU	-4.91
MIMAT0004784_MirBase_miR-455-3p_microRNA	AUUGUUUUUAUGUGUGUU	GCAGUCCAUGGGCAUAUACAC	-4.91
MIMAT0018205_MirBase_miR-3928_microRNA	UUAAAAAGUUGAAGAA	GGAGGAACCUUGGAGCUUCGGC	-4.91
MIMAT0000226_MirBase_miR-196a_microRNA	UAAAAUGAAUUAUC	UAGGUAGUUUCAUGUUGUUGGG	-4.9
MIMAT0003254_MirBase_miR-548b-3p_microRNA	ACAAUUGGAACUGUAACUUUG	CAAGAACCUCAGUUGCUUUUGU	-4.9
MIMAT0000103_MirBase_miR-106a_microRNA	UUGUACUAAUUAUAUGCCUUAUUUCUU	AAAAGUGCUUACAGUGCAGGUAG	-4.89
MIMAT0003322_MirBase_miR-652_microRNA	UUUACUCAACCGCUACUUUAGAC	AAUGGCGCCACUAGGGUUGUG	-4.89
MIMAT0000062_MirBase_let-7a_microRNA	UCAAUUUAAACACC	UGAGGUAGUAGGUUGUAUAGUU	-4.88
MIMAT0000070_MirBase_miR-17_microRNA	UUGUACUAAUUAUAUGCCUUAUUUCUU	CAAAGUGCUUACAGUGCAGGUAG	-4.88
MIMAT0000438_MirBase_miR-152_microRNA	UUGUGCAAACUUUA	UCAGUGCAUGACAGAACUUGG	-4.88
MIMAT0007882_MirBase_miR-1909*_microRNA	AUUUUUGUACUUGUUACU	UGAGUGCCGGUGCCUGCCCUG	-4.88
MIMAT0002820_MirBase_miR-497_microRNA	UAAUAUUACAAACU	CAGCAGCACACUGUGGUUUGU	-4.87
MIMAT0003258_MirBase_miR-590-5p_microRNA	UUGUACUAAUUAUAUGCCUUAUUUCUU	GAGCUUAUUCAUAAAAGUGCAG	-4.87
MIMAT0000449_MirBase_miR-146a_microRNA	UUAGAUAUAUGAAUUCA	UGAGAACUGAAUUCCAUGGGUU	-4.86
MIMAT0004767_MirBase_miR-193b*_microRNA	AAAGAACUUCACAACUGCUC	CGGGGUUUUGAGGGCGAGAUGA	-4.86
MIMAT0000226_MirBase_miR-196a_microRNA	UUAGAUAUAUGAAUUCA	UAGGUAGUUUCAUGUUGUUGGG	-4.85
MIMAT0000096_MirBase_miR-98_microRNA	CTTTAATTTAACCGTTT	UGAGGUAGUAAGUUGUAUUGUU	-4.84
MIMAT0000096_MirBase_miR-98_microRNA	AAACTATTTTTAGAGATACT	UGAGGUAGUAAGUUGUAUUGUU	-4.84
MIMAT0000067_MirBase_let-7f_microRNA	ACAAUUGGAACUGUAACUUUG	UGAGGUAGUAGAUUGUAUAGUU	-4.82
MIMAT0000066_MirBase_let-7e_microRNA	UUUUACAAUUAAUUG	UGAGGUAGGAGGUUGUAUAGUU	-4.81
MIMAT0000093_MirBase_miR-93_microRNA	AAUAAUUAAUCUUGUACAA	CAAAGUGCUGUUCGUGCAGGUAG	-4.81
MIMAT0000414_MirBase_let-7g_microRNA	CCAUACCCACAAAUUUUAC	UGAGGUAGUAGUUUGUACAGUU	-4.81
MIMAT0000415_MirBase_let-7i_microRNA	UCUUGAAACUGCUCAA	UGAGGUAGUAGUUUGUGCUGUU	-4.81
MIMAT0004809_MirBase_miR-628-5p_microRNA	AUUGUUUUUAUGUGUGUU	AUGCUGACAUAUUUACUAGAGG	-4.8
MIMAT0003885_MirBase_miR-454_microRNA	AAUAAUUAAUCUUGUACAA	UAGUGCAAUAUUGCUUAUAGGGU	-4.79
MIMAT0004748_MirBase_miR-423-5p_microRNA	AUUUUUGUACUUGUUACU	UGAGGGGCAGAGAGCGAGACUUU	-4.79
MIMAT0000076_MirBase_miR-21_microRNA	GCUCUCACUCAACAUGG	UAGCUUAUCAGACUGAUGUUGA	-4.78
MIMAT0002821_MirBase_miR-181d_microRNA	ACACCUAUCCUUCU	AACAUUCAUUGUUGUCGGUGGGU	-4.78
MIMAT0002872_MirBase_miR-501-5p_microRNA	UUUACUCAACCGCUACUUUAGAC	AAUCCUUUGUCCCUGGGUGAGA	-4.78
MIMAT0000063_MirBase_let-7b_microRNA	UUUUACAAUUAAUUG	UGAGGUAGUAGGUUGUGUGGUU	-4.77
MIMAT0000243_MirBase_miR-148a_microRNA	AUUGUUUUUAUGUGUGUU	UCAGUGCACUACAGAACUUUGU	-4.77
MIMAT0000257_MirBase_miR-181b_microRNA	ACACCUAUCCUUCU	AACAUUCAUUGCUGUCGGUGGGU	-4.77
MIMAT0000710_MirBase_miR-365_microRNA	AAACTATTTTTAGAGATACT	UAAUGCCCCUAAAAAUCCUUAU	-4.76
MIMAT0003887_MirBase_miR-769-3p_microRNA	UGUCACUAAGAAAUCU	CUGGGAUCUCCGGGGUCUUGGUU	-4.76
MIMAT0000278_MirBase_miR-221_microRNA	UCAAGAAAUUCAAC	AGCUACAUUGUCUGCUGGGUUUC	-4.75
MIMAT0003339_MirBase_miR-421_microRNA	UGUAUUAAUGCUAAC	AUCAACAGACAUUAAUUGGGCGC	-4.74
MIMAT0004549_MirBase_miR-148a*_microRNA	AAAGAACUUCACAACUGCUC	AAAGUUCUGAGACACUCCGACU	-4.74
MIMAT0004609_MirBase_miR-149*_microRNA	CAAGCUUUGUUAAA	AGGGAGGGACGGGGGCUGUGC	-4.72
MIMAT0004681_MirBase_miR-26a-2*_microRNA	AATGGGTGAATGATTT	CCUAUUCUUGAUUACUUGUUUC	-4.72
MIMAT0004957_MirBase_miR-760_microRNA	AAACTATTTTTAGAGATACT	CGGCUCUGGGUCUGUGGGGA	-4.72
MIMAT0000457_MirBase_miR-188-5p_microRNA	UCUUUACCAACCACCACAAACCUCUAU	CAUCCCUUGCAUGGUGGAGGG	-4.71
MIMAT0002872_MirBase_miR-501-5p_microRNA	AAUCAUCAUCUAAA	AAUCCUUUGUCCCUGGGUGAGA	-4.71
MIMAT0004549_MirBase_miR-148a*_microRNA	ACAAUUGGAACUGUAACUUUG	AAAGUUCUGAGACACUCCGACU	-4.71
MIMAT0000063_MirBase_let-7b_microRNA	CTTTAATTTAACCGTTT	UGAGGUAGUAGGUUGUGUGGUU	-4.7
MIMAT0000226_MirBase_miR-196a_microRNA	GAAAUUAAAUUGGCAAA	UAGGUAGUUUCAUGUUGUUGGG	-4.7
MIMAT0004502_MirBase_miR-28-3p_microRNA	UUUUACAAUUAAUUG	CACUAGAUUGUGAGCUCCUGGA	-4.7
MIMAT0000067_MirBase_let-7f_microRNA	AUUUUUGUACUUGUUACU	UGAGGUAGUAGAUUGUAUAGUU	-4.69
MIMAT0001341_MirBase_miR-424_microRNA	GCUCUCACUCAACAUGG	CAGCAGCAAUUCAUGUUUUGAA	-4.69
MIMAT0000281_MirBase_miR-224_microRNA	AAACTATTTTTAGAGATACT	CAAGUCACUAGUGGUUCCGUU	-4.68
MIMAT0000455_MirBase_miR-185_microRNA	AAAUGAUUGCUCAA	UGGAGAGAAAGGCAGUUCCUGA	-4.68
MIMAT0004694_MirBase_miR-342-5p_microRNA	ACACCUAUCCUUCU	AGGGGUGCUAUCUGUGAUUGA	-4.68
MIMAT0015031_MirBase_miR-3157_microRNA	UGUAUUAAUGCUAAC	UUCAGCCAGGCUAGUGCAGUCU	-4.68
MIMAT0000418_MirBase_miR-23b_microRNA	AAUAAUUAAUCUUGUACAA	AUCACAUUGCCAGGGAUUACC	-4.67
MIMAT0000259_MirBase_miR-182_microRNA	UUGUUAAAAUUUAUUG	UUUGGCAAUGGUAGAACUCACACU	-4.66
MIMAT0004767_MirBase_miR-193b*_microRNA	CACAUGCUUUUCCA	CGGGGUUUUGAGGGCGAGAUGA	-4.66
MIMAT0004688_MirBase_miR-374a*_microRNA	UAAUAUUACAAACU	CUUAUCAGAUUGUAUUGUAAUU	-4.65
MIMAT0000095_MirBase_miR-96_microRNA	CAAGCUUUGUUAAA	UUUGGCACUAGCACAUUUUUGCU	-4.64
MIMAT0000262_MirBase_miR-187_microRNA	GCUCUCACUCAACAUGG	UCGUGUCUUGUGUUGCAGCCGG	-4.64
MIMAT0001341_MirBase_miR-424_microRNA	AAAUGAUUGCUCAA	CAGCAGCAAUUCAUGUUUUGAA	-4.64
MIMAT0004493_MirBase_miR-20a*_microRNA	CUGUCUUUAUUUCACCUUAUAAUU	ACUGCAUUAUGAGCACUUAAAG	-4.64
MIMAT0000278_MirBase_miR-221_microRNA	UGUCACUAAGAAAUCU	AGCUACAUUGUCUGCUGGGUUUC	-4.62
MIMAT0004957_MirBase_miR-760_microRNA	CUGUCUUUAUUUCACCUUAUAAUU	CGGCUCUGGGUCUGUGGGGA	-4.62
MIMAT0000438_MirBase_miR-152_microRNA	AUUGUUUUUAUGUGUGUU	UCAGUGCAUGACAGAACUUGG	-4.61
MIMAT0000064_MirBase_let-7c_microRNA	CTTTAATTTAACCGTTT	UGAGGUAGUAGGUUGUAUGGUU	-4.6
MIMAT0000267_MirBase_miR-210_microRNA	UUGUACUAAUUAUAUGCCUUAUUUCUU	CUGUGCGUGUGACAGCGGCUGA	-4.6
MIMAT0000281_MirBase_miR-224_microRNA	UCUUGAAACUGCUCAA	CAAGUCACUAGUGGUUCCGUU	-4.6
MIMAT0000083_MirBase_miR-26b_microRNA	AAAUGAUUGCUCAA	UUCAAGUAAUUCAGGAUAGGU	-4.59
MIMAT0000254_MirBase_miR-10b_microRNA	UUUUACAAUUAAUUG	UACCCUGUAGAACCGAAUUUGUG	-4.59
MIMAT0000419_MirBase_miR-27b_microRNA	AUAAACCUAUUGUU	UUCACAGUGGCUAAGUUCUGC	-4.59
MIMAT0004496_MirBase_miR-23a*_microRNA	UUUGAUAAAAAUCUCUAUGA	GGGGUUCCUGGGGAUGGGAUUU	-4.59
MIMAT0000430_MirBase_miR-138_microRNA	UUUAAUUUUUCACAAAUAUUAC	AGCUGGUGUUGUGAAUCAGGCCG	-4.58
MIMAT0002821_MirBase_miR-181d_microRNA	AUAAACCUAUUGUU	AACAUUCAUUGUUGUCGGUGGGU	-4.58
MIMAT0002821_MirBase_miR-181d_microRNA	AUCCAUCAAAACCA	AACAUUCAUUGUUGUCGGUGGGU	-4.58
MIMAT0004958_MirBase_miR-301b_microRNA	GAAAUUAAAUUGGCAAA	CAGUGCAAUGAUAUUGUCAAAGC	-4.58
MIMAT0000062_MirBase_let-7a_microRNA	CTTTAATTTAACCGTTT	UGAGGUAGUAGGUUGUAUAGUU	-4.57
MIMAT0000242_MirBase_miR-129-5p_microRNA	UUUACUCAACCGCUACUUUAGAC	CUUUUUGCGGUCUGGGCUUGC	-4.57
MIMAT0000772_MirBase_miR-345_microRNA	CAAGCUUUGUUAAA	GCUGACUCCUAGUCCAGGGCUC	-4.57
MIMAT0000257_MirBase_miR-181b_microRNA	AUCCAUCAAAACCA	AACAUUCAUUGCUGUCGGUGGGU	-4.56
MIMAT0004949_MirBase_miR-877_microRNA	AAACTATTTTTAGAGATACT	GUAGAGGAGAUGGCGCAGGG	-4.56
MIMAT0000710_MirBase_miR-365_microRNA	AUUGUUUUUAUGUGUGUU	UAAUGCCCCUAAAAAUCCUUAU	-4.55
MIMAT0004550_MirBase_miR-30c-2*_microRNA	UAAUUCUUUCACAC	CUGGGAGAAGGCUGUUUACUCU	-4.55
MIMAT0004985_MirBase_miR-942_microRNA	UUGUUAAAAUUUAUUG	UCUUCUCUGUUUUGGCCAUGUG	-4.55
MIMAT0000257_MirBase_miR-181b_microRNA	AUAAACCUAUUGUU	AACAUUCAUUGCUGUCGGUGGGU	-4.54
MIMAT0001412_MirBase_miR-18b_microRNA	UGUAUUAAUGCUAAC	UAAGGUGCAUCUAGUGCAGUUAG	-4.54
MIMAT0002820_MirBase_miR-497_microRNA	AUAAACCUAUUGUU	CAGCAGCACACUGUGGUUUGU	-4.54
MIMAT0004589_MirBase_miR-30b*_microRNA	ACCAAACCAACCAUAUCCAA	CUGGGAGGUGGAUGUUUACUUC	-4.54
MIMAT0000278_MirBase_miR-221_microRNA	CCAAUGGAAAAACUCAA	AGCUACAUUGUCUGCUGGGUUUC	-4.53
MIMAT0000414_MirBase_let-7g_microRNA	CACAAGUCAAACAAAUUUACAAA	UGAGGUAGUAGUUUGUACAGUU	-4.53
MIMAT0000510_MirBase_miR-320a_microRNA	AAUAAUUAAUCUUGUACAA	AAAAGCUGGGUUGAGAGGGCGA	-4.52
MIMAT0000416_MirBase_miR-1_microRNA	UUAGAUAUAUGAAUUCA	UGGAAUGUAAAGAAGUAUGUAU	-4.51
MIMAT0001618_MirBase_miR-191*_microRNA	UGUCACUAAGAAAUCU	GCUGCGCUUGGAUUUCGUCCCC	-4.51
MIMAT0004767_MirBase_miR-193b*_microRNA	UUCCAAAAUCAUAA	CGGGGUUUUGAGGGCGAGAUGA	-4.51
MIMAT0005892_MirBase_miR-1304_microRNA	CAAGCUUUGUUAAA	UUUGAGGCUACAGUGAGAUGUG	-4.51
MIMAT0003258_MirBase_miR-590-5p_microRNA	AUUGUUUUUAUGUGUGUU	GAGCUUAUUCAUAAAAGUGCAG	-4.5
MIMAT0004486_MirBase_let-7f-1*_microRNA	AATGGGTGAATGATTT	CUAUACAAUCUAUUGCCUUCCC	-4.5
MIMAT0004688_MirBase_miR-374a*_microRNA	UUAAAAAUUACAGAA	CUUAUCAGAUUGUAUUGUAAUU	-4.5
MIMAT0000083_MirBase_miR-26b_microRNA	AUUUUUGUACUUGUUACU	UUCAAGUAAUUCAGGAUAGGU	-4.49
MIMAT0000084_MirBase_miR-27a_microRNA	GAGAAUUUGACUAAAG	UUCACAGUGGCUAAGUUCCGC	-4.48
MIMAT0003258_MirBase_miR-590-5p_microRNA	UUAGAUAUAUGAAUUCA	GAGCUUAUUCAUAAAAGUGCAG	-4.48
MIMAT0000080_MirBase_miR-24_microRNA	UAUUCUGUUAUUUACUUGUAC	UGGCUCAGUUCAGCAGGAACAG	-4.47
MIMAT0000318_MirBase_miR-200b_microRNA	UAUUCUGUUAUUUACUUGUAC	UAAUACUGCCUGGUAAUGAUGA	-4.47
MIMAT0000753_MirBase_miR-342-3p_microRNA	AUUUUUGUACUUGUUACU	UCUCACACAGAAAUCGCACCCGU	-4.46
MIMAT0000069_MirBase_miR-16_microRNA	AAUUUGCUGAUGAUU	UAGCAGCACGUAAAUAUUGGCG	-4.45
MIMAT0000732_MirBase_miR-378_microRNA	GAGAAUUUGACUAAAG	ACUGGACUUGGAGUCAGAAGG	-4.45
MIMAT0016847_MirBase_miR-378c_microRNA	UAAUUCUUUCACAC	ACUGGACUUGGAGUCAGAAGAGUGG	-4.45
MIMAT0003242_MirBase_miR-577_microRNA	AAUUUGCUGAUGAUU	UAGAUAAAAUAUUGGUACCUG	-4.44
MIMAT0003339_MirBase_miR-421_microRNA	AAUAAUUAAUCUUGUACAA	AUCAACAGACAUUAAUUGGGCGC	-4.44
MIMAT0004957_MirBase_miR-760_microRNA	UAUUGAAUAUCCUAUAA	CGGCUCUGGGUCUGUGGGGA	-4.44
MIMAT0005792_MirBase_miR-320b_microRNA	AAUAAUUAAUCUUGUACAA	AAAAGCUGGGUUGAGAGGGCAA	-4.44
MIMAT0000440_MirBase_miR-191_microRNA	AUUGUUUUUAUGUGUGUU	CAACGGAAUCCCAAAAGCAGCUG	-4.43
MIMAT0000691_MirBase_miR-130b_microRNA	AUUUUUGUACUUGUUACU	CAGUGCAAUGAUGAAAGGGCAU	-4.43
MIMAT0000703_MirBase_miR-361-5p_microRNA	UUACAAACAAUUUGAUACUU	UUAUCAGAAUCUCCAGGGGUAC	-4.43
MIMAT0000074_MirBase_miR-19b_microRNA	AAUAAUUAAUCUUGUACAA	UGUGCAAAUCCAUGCAAAACUGA	-4.42
MIMAT0000727_MirBase_miR-374a_microRNA	UAUUCUGUUAUUUACUUGUAC	UUAUAAUACAACCUGAUAAGUG	-4.42
MIMAT0000075_MirBase_miR-20a_microRNA	UUUACUCAACCGCUACUUUAGAC	UAAAGUGCUUAUAGUGCAGGUAG	-4.41
MIMAT0000693_MirBase_miR-30e*_microRNA	UUAGAUAUAUGAAUUCA	CUUUCAGUCGGAUGUUUACAGC	-4.4
MIMAT0018183_MirBase_miR-3909_microRNA	UUUACUCAACCGCUACUUUAGAC	UGUCCUCUAGGGCCUGCAGUCU	-4.4
MIMAT0000066_MirBase_let-7e_microRNA	UUAGAUAUAUGAAUUCA	UGAGGUAGGAGGUUGUAUAGUU	-4.39
MIMAT0000073_MirBase_miR-19a_microRNA	AAUAAUUAAUCUUGUACAA	UGUGCAAAUCUAUGCAAAACUGA	-4.39
MIMAT0000096_MirBase_miR-98_microRNA	CUGUCUUUAUUUCACCUUAUAAUU	UGAGGUAGUAAGUUGUAUUGUU	-4.39
MIMAT0000681_MirBase_miR-29c_microRNA	AAACTATTTTTAGAGATACT	UAGCACCAUUUGAAAUCGGUUA	-4.38
MIMAT0001341_MirBase_miR-424_microRNA	AUCCAUCAAAACCA	CAGCAGCAAUUCAUGUUUUGAA	-4.38
MIMAT0004515_MirBase_miR-29b-2*_microRNA	UCUUGAAACUGCUCAA	CUGGUUUCACAUGGUGGCUUAG	-4.38
MIMAT0000065_MirBase_let-7d_microRNA	CUGUCUUUAUUUCACCUUAUAAUU	AGAGGUAGUAGGUUGCAUAGUU	-4.37
MIMAT0001080_MirBase_miR-196b_microRNA	CCAAUGGAAAAACUCAA	UAGGUAGUUUCCUGUUGUUGGG	-4.37
MIMAT0000455_MirBase_miR-185_microRNA	AUUGUUUUUAUGUGUGUU	UGGAGAGAAAGGCAGUUCCUGA	-4.36
MIMAT0000691_MirBase_miR-130b_microRNA	UAAUUCUUUCACAC	CAGUGCAAUGAUGAAAGGGCAU	-4.36
MIMAT0003322_MirBase_miR-652_microRNA	UAACCUUAACUUGC	AAUGGCGCCACUAGGGUUGUG	-4.35
MIMAT0004491_MirBase_miR-19b-1*_microRNA	UAUUCUGUUAUUUACUUGUAC	AGUUUUGCAGGUUUGCAUCCAGC	-4.34
MIMAT0004555_MirBase_miR-10a*_microRNA	UUUACUCAACCGCUACUUUAGAC	CAAAUUCGUAUCUAGGGGAAUA	-4.34
MIMAT0015069_MirBase_miR-3187_microRNA	UUGUGCAAACUUUA	UUGGCCAUGGGGCUGCGCGG	-4.34
MIMAT0000226_MirBase_miR-196a_microRNA	AAAUGAUUGCUCAA	UAGGUAGUUUCAUGUUGUUGGG	-4.33
MIMAT0000691_MirBase_miR-130b_microRNA	CUGUCUUUAUUUCACCUUAUAAUU	CAGUGCAAUGAUGAAAGGGCAU	-4.33
MIMAT0000261_MirBase_miR-183_microRNA	AAUUUGCUGAUGAUU	UAUGGCACUGGUAGAAUUCACU	-4.31
MIMAT0003266_MirBase_miR-598_microRNA	CGAAUACCAUAAUGAAU	UACGUCAUCGUUGUCAUCGUCA	-4.31
MIMAT0000427_MirBase_miR-133a_microRNA	GAGAAUUUGACUAAAG	UUUGGUCCCCUUCAACCAGCUG	-4.3
MIMAT0004679_MirBase_miR-296-3p_microRNA	CUUUACUUGCUUUACA	GAGGGUUGGGUGGAGGCUCUCC	-4.3
MIMAT0004784_MirBase_miR-455-3p_microRNA	UCUUGUCUGUUAAUC	GCAGUCCAUGGGCAUAUACAC	-4.3
MIMAT0004958_MirBase_miR-301b_microRNA	UUUGAUAAAAAUCUCUAUGA	CAGUGCAAUGAUAUUGUCAAAGC	-4.3
MIMAT0007881_MirBase_miR-1908_microRNA	UUGUACUAAUUAUAUGCCUUAUUUCUU	CGGCGGGGACGGCGAUUGGUC	-4.3
MIMAT0004983_MirBase_miR-940_microRNA	CUUUACUUGCUUUACA	AAGGCAGGGCCCCCGCUCCCC	-4.29
MIMAT0000226_MirBase_miR-196a_microRNA	AAACTATTTTTAGAGATACT	UAGGUAGUUUCAUGUUGUUGGG	-4.28
MIMAT0000258_MirBase_miR-181c_microRNA	AAUUUGCUGAUGAUU	AACAUUCAACCUGUCGGUGAGU	-4.28
MIMAT0000259_MirBase_miR-182_microRNA	UAUUCUGUUAUUUACUUGUAC	UUUGGCAAUGGUAGAACUCACACU	-4.28
MIMAT0004767_MirBase_miR-193b*_microRNA	AUAAGAAACCUGCUUCAA	CGGGGUUUUGAGGGCGAGAUGA	-4.27
MIMAT0000222_MirBase_miR-192_microRNA	UUGUUAAAAUUUAUUG	CUGACCUAUGAAUUGACAGCC	-4.26
MIMAT0000415_MirBase_let-7i_microRNA	CUUUACUUGCUUUACA	UGAGGUAGUAGUUUGUGCUGUU	-4.26
MIMAT0000441_MirBase_miR-9_microRNA	UUAGAUAUAUGAAUUCA	UCUUUGGUUAUCUAGCUGUAUGA	-4.26
MIMAT0003322_MirBase_miR-652_microRNA	AAAGAACUUCACAACUGCUC	AAUGGCGCCACUAGGGUUGUG	-4.26
MIMAT0000072_MirBase_miR-18a_microRNA	UCUUGUCUGUUAAUC	UAAGGUGCAUCUAGUGCAGAUAG	-4.25
MIMAT0000078_MirBase_miR-23a_microRNA	UUAAAAAUCUGAAUUCUUC	AUCACAUUGCCAGGGAUUUCC	-4.25
MIMAT0000063_MirBase_let-7b_microRNA	UUCCAAAAUCAUAA	UGAGGUAGUAGGUUGUGUGGUU	-4.24
MIMAT0001618_MirBase_miR-191*_microRNA	GAAATGAACGAAATGT	GCUGCGCUUGGAUUUCGUCCCC	-4.24
MIMAT0004809_MirBase_miR-628-5p_microRNA	AAACTATTTTTAGAGATACT	AUGCUGACAUAUUUACUAGAGG	-4.24
MIMAT0018205_MirBase_miR-3928_microRNA	UAAUUCUUUCACAC	GGAGGAACCUUGGAGCUUCGGC	-4.24
MIMAT0002821_MirBase_miR-181d_microRNA	CGAAUACCAUAAUGAAU	AACAUUCAUUGUUGUCGGUGGGU	-4.23
MIMAT0004602_MirBase_miR-125a-3p_microRNA	UUGUACUAAUUAUAUGCCUUAUUUCUU	ACAGGUGAGGUUCUUGGGAGCC	-4.23
MIMAT0000076_MirBase_miR-21_microRNA	UUACAAACAAUUUGAUACUU	UAGCUUAUCAGACUGAUGUUGA	-4.22
MIMAT0003294_MirBase_miR-625_microRNA	UAAUUCUUUCACAC	AGGGGGAAAGUUCUAUAGUCC	-4.22
MIMAT0004602_MirBase_miR-125a-3p_microRNA	UCUUUACCAACCACCACAAACCUCUAU	ACAGGUGAGGUUCUUGGGAGCC	-4.22
MIMAT0000267_MirBase_miR-210_microRNA	UAUUCUGUUAUUUACUUGUAC	CUGUGCGUGUGACAGCGGCUGA	-4.21
MIMAT0000281_MirBase_miR-224_microRNA	UAAAAUGAAUUAUC	CAAGUCACUAGUGGUUCCGUU	-4.21
MIMAT0000416_MirBase_miR-1_microRNA	UUUUACAAUUAAUUG	UGGAAUGUAAAGAAGUAUGUAU	-4.21
MIMAT0018205_MirBase_miR-3928_microRNA	CAAGCUUUGUUAAA	GGAGGAACCUUGGAGCUUCGGC	-4.21
MIMAT0000414_MirBase_let-7g_microRNA	AAACTATTTTTAGAGATACT	UGAGGUAGUAGUUUGUACAGUU	-4.2
MIMAT0004957_MirBase_miR-760_microRNA	UUUAAUUUUUCACAAAUAUUAC	CGGCUCUGGGUCUGUGGGGA	-4.2
MIMAT0004767_MirBase_miR-193b*_microRNA	UUGUGCAAACUUUA	CGGGGUUUUGAGGGCGAGAUGA	-4.19
MIMAT0002871_MirBase_miR-500a*_microRNA	GAGAAUUUGACUAAAG	AUGCACCUGGGCAAGGAUUCUG	-4.18
MIMAT0004983_MirBase_miR-940_microRNA	CAAGCUUUGUUAAA	AAGGCAGGGCCCCCGCUCCCC	-4.18
MIMAT0000415_MirBase_let-7i_microRNA	UUACAAACAAUUUGAUACUU	UGAGGUAGUAGUUUGUGCUGUU	-4.17
MIMAT0004589_MirBase_miR-30b*_microRNA	UUUACUCAACCGCUACUUUAGAC	CUGGGAGGUGGAUGUUUACUUC	-4.17
MIMAT0000077_MirBase_miR-22_microRNA	ACAAUUGGAACUGUAACUUUG	AAGCUGCCAGUUGAAGAACUGU	-4.16
MIMAT0000254_MirBase_miR-10b_microRNA	GAGAAUUUGACUAAAG	UACCCUGUAGAACCGAAUUUGUG	-4.16
MIMAT0004810_MirBase_miR-629_microRNA	CACAUGCUUUUCCA	UGGGUUUACGUUGGGAGAACU	-4.16
MIMAT0000064_MirBase_let-7c_microRNA	UUCCAAAAUCAUAA	UGAGGUAGUAGGUUGUAUGGUU	-4.15
MIMAT0000100_MirBase_miR-29b_microRNA	AAUUUGCUGAUGAUU	UAGCACCAUUUGAAAUCAGUGUU	-4.15
MIMAT0000067_MirBase_let-7f_microRNA	UUGUUAAAAUUUAUUG	UGAGGUAGUAGAUUGUAUAGUU	-4.14
MIMAT0004678_MirBase_miR-99b*_microRNA	UUAGAUAUAUGAAUUCA	CAAGCUCGUGUCUGUGGGUCCG	-4.14
MIMAT0000222_MirBase_miR-192_microRNA	CAAGCUUUGUUAAA	CUGACCUAUGAAUUGACAGCC	-4.13
MIMAT0000226_MirBase_miR-196a_microRNA	UUAAAAAUUACAGAA	UAGGUAGUUUCAUGUUGUUGGG	-4.13
MIMAT0000455_MirBase_miR-185_microRNA	ACAACAUGUUAAAAACUGUUUA	UGGAGAGAAAGGCAGUUCCUGA	-4.13
MIMAT0016847_MirBase_miR-378c_microRNA	UUUAAUUUUUCACAAAUAUUAC	ACUGGACUUGGAGUCAGAAGAGUGG	-4.12
MIMAT0000090_MirBase_miR-32_microRNA	ACAAUUGGAACUGUAACUUUG	UAUUGCACAUUACUAAGUUGCA	-4.11
MIMAT0000431_MirBase_miR-140-5p_microRNA	AUCCAUCAAAACCA	CAGUGGUUUUACCCUAUGGUAG	-4.11
MIMAT0000761_MirBase_miR-324-5p_microRNA	CUUUACUUGCUUUACA	CGCAUCCCCUAGGGCAUUGGUGU	-4.11
MIMAT0004507_MirBase_miR-92a-1*_microRNA	ACUCAAUUACCCCCUGCA	AGGUUGGGAUCGGUUGCAAUGCU	-4.11
MIMAT0000253_MirBase_miR-10a_microRNA	GAGAAUUUGACUAAAG	UACCCUGUAGAUCCGAAUUUGUG	-4.1
MIMAT0000256_MirBase_miR-181a_microRNA	UUACCCACUUACUAAA	AACAUUCAACGCUGUCGGUGAGU	-4.1
MIMAT0004679_MirBase_miR-296-3p_microRNA	UCUUGAAACUGCUCAA	GAGGGUUGGGUGGAGGCUCUCC	-4.1
MIMAT0000063_MirBase_let-7b_microRNA	UAUUCUGUUAUUUACUUGUAC	UGAGGUAGUAGGUUGUGUGGUU	-4.09
MIMAT0000257_MirBase_miR-181b_microRNA	AAUUUGCUGAUGAUU	AACAUUCAUUGCUGUCGGUGGGU	-4.09
MIMAT0000222_MirBase_miR-192_microRNA	CTTTAATTTAACCGTTT	CUGACCUAUGAAUUGACAGCC	-4.08
MIMAT0000418_MirBase_miR-23b_microRNA	UAAUUCUUUCACAC	AUCACAUUGCCAGGGAUUACC	-4.08
MIMAT0000068_MirBase_miR-15a_microRNA	UUGUGCAAACUUUA	UAGCAGCACAUAAUGGUUUGUG	-4.07
MIMAT0000257_MirBase_miR-181b_microRNA	AATGGGTGAATGATTT	AACAUUCAUUGCUGUCGGUGGGU	-4.07
MIMAT0004491_MirBase_miR-19b-1*_microRNA	UAACCUUAACUUGC	AGUUUUGCAGGUUUGCAUCCAGC	-4.07
MIMAT0005577_MirBase_miR-1226_microRNA	GCUCUCACUCAACAUGG	UCACCAGCCCUGUGUUCCCUAG	-4.06
MIMAT0015069_MirBase_miR-3187_microRNA	UUGUACUAAUUAUAUGCCUUAUUUCUU	UUGGCCAUGGGGCUGCGCGG	-4.06
MIMAT0000068_MirBase_miR-15a_microRNA	UAAUAUUACAAACU	UAGCAGCACAUAAUGGUUUGUG	-4.05
MIMAT0000084_MirBase_miR-27a_microRNA	AUAAACCUAUUGUU	UUCACAGUGGCUAAGUUCCGC	-4.05
MIMAT0000416_MirBase_miR-1_microRNA	AUUGUUUUUAUGUGUGUU	UGGAAUGUAAAGAAGUAUGUAU	-4.05
MIMAT0004515_MirBase_miR-29b-2*_microRNA	AAUCAUCAUCUAAA	CUGGUUUCACAUGGUGGCUUAG	-4.05
MIMAT0004597_MirBase_miR-140-3p_microRNA	UAUUCUGUUAUUUACUUGUAC	UACCACAGGGUAGAACCACGG	-4.04
MIMAT0000065_MirBase_let-7d_microRNA	UCAAUUUAAACACC	AGAGGUAGUAGGUUGCAUAGUU	-4.03
MIMAT0004673_MirBase_miR-29c*_microRNA	GAAAUUAAAUUGGCAAA	UGACCGAUUUCUCCUGGUGUUC	-4.03
MIMAT0004983_MirBase_miR-940_microRNA	UCUUGUCUGUUAAUC	AAGGCAGGGCCCCCGCUCCCC	-4.03
MIMAT0000065_MirBase_let-7d_microRNA	CTTTAATTTAACCGTTT	AGAGGUAGUAGGUUGCAUAGUU	-4.02
MIMAT0000691_MirBase_miR-130b_microRNA	CACAUGCUUUUCCA	CAGUGCAAUGAUGAAAGGGCAU	-4.02
MIMAT0004502_MirBase_miR-28-3p_microRNA	CUGUCUUUAUUUCACCUUAUAAUU	CACUAGAUUGUGAGCUCCUGGA	-4.02
MIMAT0004957_MirBase_miR-760_microRNA	CUUUACUUGCUUUACA	CGGCUCUGGGUCUGUGGGGA	-4.02
MIMAT0002809_MirBase_miR-146b-5p_microRNA	AUUGUUUUUAUGUGUGUU	UGAGAACUGAAUUCCAUAGGCU	-4.01
MIMAT0000064_MirBase_let-7c_microRNA	ACAAUUGGAACUGUAACUUUG	UGAGGUAGUAGGUUGUAUGGUU	-4
MIMAT0000064_MirBase_let-7c_microRNA	UAUUCUGUUAUUUACUUGUAC	UGAGGUAGUAGGUUGUAUGGUU	-4
MIMAT0000422_MirBase_miR-124_microRNA	AAUUUGCUGAUGAUU	UAAGGCACGCGGUGAAUGCC	-4
MIMAT0004481_MirBase_let-7a*_microRNA	AAACTATTTTTAGAGATACT	CUAUACAAUCUACUGUCUUUC	-4
MIMAT0005797_MirBase_miR-1301_microRNA	UAAACAUAUAACUUCUA	UUGCAGCUGCCUGGGAGUGACUUC	-4
MIMAT0000095_MirBase_miR-96_microRNA	UUGUUAAAAUUUAUUG	UUUGGCACUAGCACAUUUUUGCU	-3.99
MIMAT0000762_MirBase_miR-324-3p_microRNA	AUUUUUGUACUUGUUACU	ACUGCCCCAGGUGCUGCUGG	-3.99
MIMAT0005797_MirBase_miR-1301_microRNA	UAUUCUGUUAUUUACUUGUAC	UUGCAGCUGCCUGGGAGUGACUUC	-3.99
MIMAT0000088_MirBase_miR-30a*_microRNA	UUAGAUAUAUGAAUUCA	CUUUCAGUCGGAUGUUUGCAGC	-3.98
MIMAT0004792_MirBase_miR-92b*_microRNA	UAUUCUGUUAUUUACUUGUAC	AGGGACGGGACGCGGUGCAGUG	-3.98
MIMAT0000456_MirBase_miR-186_microRNA	UUCCAAAAUCAUAA	CAAAGAAUUCUCCUUUUGGGCU	-3.97
MIMAT0004612_MirBase_miR-186*_microRNA	UCAAGAAAUUCAAC	GCCCAAAGGUGAAUUUUUUGGG	-3.97
MIMAT0000425_MirBase_miR-130a_microRNA	AUUUUUGUACUUGUUACU	CAGUGCAAUGUUAAAAGGGCAU	-3.96
MIMAT0000093_MirBase_miR-93_microRNA	AUUUUUGUACUUGUUACU	CAAAGUGCUGUUCGUGCAGGUAG	-3.95
MIMAT0000457_MirBase_miR-188-5p_microRNA	CUUUACUUGCUUUACA	CAUCCCUUGCAUGGUGGAGGG	-3.95
MIMAT0000417_MirBase_miR-15b_microRNA	UUCCAAAAUCAUAA	UAGCAGCACAUCAUGGUUUACA	-3.94
MIMAT0000457_MirBase_miR-188-5p_microRNA	AUCCAUCAAAACCA	CAUCCCUUGCAUGGUGGAGGG	-3.94
MIMAT0004767_MirBase_miR-193b*_microRNA	CCAAUGGAAAAACUCAA	CGGGGUUUUGAGGGCGAGAUGA	-3.94
MIMAT0000065_MirBase_let-7d_microRNA	CACAAGUCAAACAAAUUUACAAA	AGAGGUAGUAGGUUGCAUAGUU	-3.93
MIMAT0000096_MirBase_miR-98_microRNA	UUGUUAAAAUUUAUUG	UGAGGUAGUAAGUUGUAUUGUU	-3.92
MIMAT0000261_MirBase_miR-183_microRNA	CCAUACCCACAAAUUUUAC	UAUGGCACUGGUAGAAUUCACU	-3.92
MIMAT0000281_MirBase_miR-224_microRNA	UGUCACUAAGAAAUCU	CAAGUCACUAGUGGUUCCGUU	-3.92
MIMAT0018359_MirBase_miR-3943_microRNA	AATGGGTGAATGATTT	UAGCCCCCAGGCUUCACUUGGCG	-3.92
MIMAT0000096_MirBase_miR-98_microRNA	UAUUCUGUUAUUUACUUGUAC	UGAGGUAGUAAGUUGUAUUGUU	-3.91
MIMAT0000414_MirBase_let-7g_microRNA	UUAAAAAUUACAGAA	UGAGGUAGUAGUUUGUACAGUU	-3.91
MIMAT0000510_MirBase_miR-320a_microRNA	CACAUGCUUUUCCA	AAAAGCUGGGUUGAGAGGGCGA	-3.91
MIMAT0005792_MirBase_miR-320b_microRNA	CUUUACUUGCUUUACA	AAAAGCUGGGUUGAGAGGGCAA	-3.91
MIMAT0002888_MirBase_miR-532-5p_microRNA	UCUUGAAACUGCUCAA	CAUGCCUUGAGUGUAGGACCGU	-3.9
MIMAT0003886_MirBase_miR-769-5p_microRNA	AAAGAACUUCACAACUGCUC	UGAGACCUCUGGGUUCUGAGCU	-3.89
MIMAT0004682_MirBase_miR-361-3p_microRNA	UUCCAAAAUCAUAA	UCCCCCAGGUGUGAUUCUGAUUU	-3.88
MIMAT0003339_MirBase_miR-421_microRNA	AACACGTTTGAAAT	AUCAACAGACAUUAAUUGGGCGC	-3.87
MIMAT0004985_MirBase_miR-942_microRNA	AACACGTTTGAAAT	UCUUCUCUGUUUUGGCCAUGUG	-3.86
MIMAT0003880_MirBase_miR-671-5p_microRNA	CACAUGCUUUUCCA	AGGAAGCCCUGGAGGGGCUGGAG	-3.85
MIMAT0004597_MirBase_miR-140-3p_microRNA	UUUACUCAACCGCUACUUUAGAC	UACCACAGGGUAGAACCACGG	-3.84
MIMAT0004748_MirBase_miR-423-5p_microRNA	UAAUUCUUUCACAC	UGAGGGGCAGAGAGCGAGACUUU	-3.84
MIMAT0004773_MirBase_miR-500a_microRNA	UUUACUCAACCGCUACUUUAGAC	UAAUCCUUGCUACCUGGGUGAGA	-3.84
MIMAT0005892_MirBase_miR-1304_microRNA	AAUUUGCUGAUGAUU	UUUGAGGCUACAGUGAGAUGUG	-3.83
MIMAT0000066_MirBase_let-7e_microRNA	AAACTATTTTTAGAGATACT	UGAGGUAGGAGGUUGUAUAGUU	-3.82
MIMAT0000063_MirBase_let-7b_microRNA	UUGUUAAAAUUUAUUG	UGAGGUAGUAGGUUGUGUGGUU	-3.81
MIMAT0000074_MirBase_miR-19b_microRNA	AUUUUUGUACUUGUUACU	UGUGCAAAUCCAUGCAAAACUGA	-3.81
MIMAT0000267_MirBase_miR-210_microRNA	AUUUUUGUACUUGUUACU	CUGUGCGUGUGACAGCGGCUGA	-3.8
MIMAT0004957_MirBase_miR-760_microRNA	UUAAAAAUUACAGAA	CGGCUCUGGGUCUGUGGGGA	-3.8
MIMAT0005927_MirBase_miR-1274a_microRNA	UUAAAAAUCUGAAUUCUUC	GUCCCUGUUCAGGCGCCA	-3.8
MIMAT0000257_MirBase_miR-181b_microRNA	AUAAGAAACCUGCUUCAA	AACAUUCAUUGCUGUCGGUGGGU	-3.78
MIMAT0004957_MirBase_miR-760_microRNA	UAAUUCUUUCACAC	CGGCUCUGGGUCUGUGGGGA	-3.78
MIMAT0000073_MirBase_miR-19a_microRNA	AUUUUUGUACUUGUUACU	UGUGCAAAUCUAUGCAAAACUGA	-3.77
MIMAT0002871_MirBase_miR-500a*_microRNA	CAAGCUUUGUUAAA	AUGCACCUGGGCAAGGAUUCUG	-3.77
MIMAT0004688_MirBase_miR-374a*_microRNA	CUGUCUUUAUUUCACCUUAUAAUU	CUUAUCAGAUUGUAUUGUAAUU	-3.77
MIMAT0000226_MirBase_miR-196a_microRNA	CUUUACUUGCUUUACA	UAGGUAGUUUCAUGUUGUUGGG	-3.76
MIMAT0000064_MirBase_let-7c_microRNA	AAUAAUUAAUCUUGUACAA	UGAGGUAGUAGGUUGUAUGGUU	-3.75
MIMAT0000083_MirBase_miR-26b_microRNA	UUGUACUAAUUAUAUGCCUUAUUUCUU	UUCAAGUAAUUCAGGAUAGGU	-3.75
MIMAT0002874_MirBase_miR-503_microRNA	ACAACAUGUUAAAAACUGUUUA	UAGCAGCGGGAACAGUUCUGCAG	-3.75
MIMAT0004609_MirBase_miR-149*_microRNA	UAUUCUGUUAUUUACUUGUAC	AGGGAGGGACGGGGGCUGUGC	-3.75
MIMAT0005892_MirBase_miR-1304_microRNA	CCAUACCCACAAAUUUUAC	UUUGAGGCUACAGUGAGAUGUG	-3.75
MIMAT0000226_MirBase_miR-196a_microRNA	UAUUCUGUUAUUUACUUGUAC	UAGGUAGUUUCAUGUUGUUGGG	-3.73
MIMAT0000510_MirBase_miR-320a_microRNA	UCAAUUUAAACACC	AAAAGCUGGGUUGAGAGGGCGA	-3.73
MIMAT0000064_MirBase_let-7c_microRNA	UUGUUAAAAUUUAUUG	UGAGGUAGUAGGUUGUAUGGUU	-3.72
MIMAT0000757_MirBase_miR-151-3p_microRNA	CAAGCUUUGUUAAA	CUAGACUGAAGCUCCUUGAGG	-3.72
MIMAT0000254_MirBase_miR-10b_microRNA	UUAAAAAUCUGAAUUCUUC	UACCCUGUAGAACCGAAUUUGUG	-3.71
MIMAT0009196_MirBase_miR-103-2*_microRNA	UUAAAAAGUUGAAGAA	AGCUUCUUUACAGUGCUGCCUUG	-3.71
MIMAT0002821_MirBase_miR-181d_microRNA	AUAAGAAACCUGCUUCAA	AACAUUCAUUGUUGUCGGUGGGU	-3.69
MIMAT0000068_MirBase_miR-15a_microRNA	CACAAGUCAAACAAAUUUACAAA	UAGCAGCACAUAAUGGUUUGUG	-3.68
MIMAT0000510_MirBase_miR-320a_microRNA	CUUUACUUGCUUUACA	AAAAGCUGGGUUGAGAGGGCGA	-3.68
MIMAT0003393_MirBase_miR-425_microRNA	UAUUCUGUUAUUUACUUGUAC	AAUGACACGAUCACUCCCGUUGA	-3.68
MIMAT0004678_MirBase_miR-99b*_microRNA	UUAAAAAUUACAGAA	CAAGCUCGUGUCUGUGGGUCCG	-3.67
MIMAT0005792_MirBase_miR-320b_microRNA	UCAAUUUAAACACC	AAAAGCUGGGUUGAGAGGGCAA	-3.67
MIMAT0000062_MirBase_let-7a_microRNA	UUGUUAAAAUUUAUUG	UGAGGUAGUAGGUUGUAUAGUU	-3.66
MIMAT0000075_MirBase_miR-20a_microRNA	UGUAUUAAUGCUAAC	UAAAGUGCUUAUAGUGCAGGUAG	-3.66
MIMAT0000226_MirBase_miR-196a_microRNA	AUACAAUGUAACAC	UAGGUAGUUUCAUGUUGUUGGG	-3.66
MIMAT0004609_MirBase_miR-149*_microRNA	UAAUUCUUUCACAC	AGGGAGGGACGGGGGCUGUGC	-3.66
MIMAT0004672_MirBase_miR-106b*_microRNA	CACAAGUCAAACAAAUUUACAAA	CCGCACUGUGGGUACUUGCUGC	-3.66
MIMAT0000068_MirBase_miR-15a_microRNA	CCAUACCCACAAAUUUUAC	UAGCAGCACAUAAUGGUUUGUG	-3.65
MIMAT0000253_MirBase_miR-10a_microRNA	UUAAAAAUCUGAAUUCUUC	UACCCUGUAGAUCCGAAUUUGUG	-3.65
MIMAT0015072_MirBase_miR-320e_microRNA	UUUAAUUUUUCACAAAUAUUAC	AAAGCUGGGUUGAGAAGG	-3.65
MIMAT0004679_MirBase_miR-296-3p_microRNA	UAAUUCUUUCACAC	GAGGGUUGGGUGGAGGCUCUCC	-3.64
MIMAT0000076_MirBase_miR-21_microRNA	UUUGAUAAAAAUCUCUAUGA	UAGCUUAUCAGACUGAUGUUGA	-3.62
MIMAT0000761_MirBase_miR-324-5p_microRNA	CACAUGCUUUUCCA	CGCAUCCCCUAGGGCAUUGGUGU	-3.62
MIMAT0003297_MirBase_miR-628-3p_microRNA	AAUUUGCUGAUGAUU	UCUAGUAAGAGUGGCAGUCGA	-3.62
MIMAT0000425_MirBase_miR-130a_microRNA	CUGUCUUUAUUUCACCUUAUAAUU	CAGUGCAAUGUUAAAAGGGCAU	-3.61
MIMAT0004502_MirBase_miR-28-3p_microRNA	UUACAAACAAUUUGAUACUU	CACUAGAUUGUGAGCUCCUGGA	-3.61
MIMAT0004679_MirBase_miR-296-3p_microRNA	CTTTAATTTAACCGTTT	GAGGGUUGGGUGGAGGCUCUCC	-3.61
MIMAT0004507_MirBase_miR-92a-1*_microRNA	CTTTAATTTAACCGTTT	AGGUUGGGAUCGGUUGCAAUGCU	-3.6
MIMAT0004958_MirBase_miR-301b_microRNA	UAUUCUGUUAUUUACUUGUAC	CAGUGCAAUGAUAUUGUCAAAGC	-3.6
MIMAT0000430_MirBase_miR-138_microRNA	UUUUACAAUUAAUUG	AGCUGGUGUUGUGAAUCAGGCCG	-3.59
MIMAT0000071_MirBase_miR-17*_microRNA	CUGUCUUUAUUUCACCUUAUAAUU	ACUGCAGUGAAGGCACUUGUAG	-3.57
MIMAT0000318_MirBase_miR-200b_microRNA	AUUUUUGUACUUGUUACU	UAAUACUGCCUGGUAAUGAUGA	-3.57
MIMAT0004679_MirBase_miR-296-3p_microRNA	ACCAAACCAACCAUAUCCAA	GAGGGUUGGGUGGAGGCUCUCC	-3.57
MIMAT0000065_MirBase_let-7d_microRNA	CACAUGCUUUUCCA	AGAGGUAGUAGGUUGCAUAGUU	-3.56
MIMAT0002876_MirBase_miR-505_microRNA	ACAAUUGGAACUGUAACUUUG	CGUCAACACUUGCUGGUUUCCU	-3.56
MIMAT0000066_MirBase_let-7e_microRNA	UUUAAUUUUUCACAAAUAUUAC	UGAGGUAGGAGGUUGUAUAGUU	-3.55
MIMAT0000431_MirBase_miR-140-5p_microRNA	UUCCAAAAUCAUAA	CAGUGGUUUUACCCUAUGGUAG	-3.55
MIMAT0000461_MirBase_miR-195_microRNA	AAUUUGCUGAUGAUU	UAGCAGCACAGAAAUAUUGGC	-3.55
MIMAT0000693_MirBase_miR-30e*_microRNA	ACAAUUGGAACUGUAACUUUG	CUUUCAGUCGGAUGUUUACAGC	-3.55
MIMAT0003306_MirBase_miR-636_microRNA	AATGGGTGAATGATTT	UGUGCUUGCUCGUCCCGCCCGCA	-3.53
MIMAT0003886_MirBase_miR-769-5p_microRNA	UUAGAUAUAUGAAUUCA	UGAGACCUCUGGGUUCUGAGCU	-3.53
MIMAT0004810_MirBase_miR-629_microRNA	AUAAGAAACCUGCUUCAA	UGGGUUUACGUUGGGAGAACU	-3.52
MIMAT0011163_MirBase_miR-548q_microRNA	UUGUACUAAUUAUAUGCCUUAUUUCUU	GCUGGUGCAAAAGUAAUGGCGG	-3.52
MIMAT0002888_MirBase_miR-532-5p_microRNA	AAUAAUUAAUCUUGUACAA	CAUGCCUUGAGUGUAGGACCGU	-3.5
MIMAT0000226_MirBase_miR-196a_microRNA	AAUUUGCUGAUGAUU	UAGGUAGUUUCAUGUUGUUGGG	-3.49
MIMAT0000415_MirBase_let-7i_microRNA	CACAAGUCAAACAAAUUUACAAA	UGAGGUAGUAGUUUGUGCUGUU	-3.49
MIMAT0000414_MirBase_let-7g_microRNA	UAAAAUGAAUUAUC	UGAGGUAGUAGUUUGUACAGUU	-3.48
MIMAT0002876_MirBase_miR-505_microRNA	UCUUGAAACUGCUCAA	CGUCAACACUUGCUGGUUUCCU	-3.48
MIMAT0002888_MirBase_miR-532-5p_microRNA	UUUUACAAUUAAUUG	CAUGCCUUGAGUGUAGGACCGU	-3.47
MIMAT0000441_MirBase_miR-9_microRNA	AATGGGTGAATGATTT	UCUUUGGUUAUCUAGCUGUAUGA	-3.46
MIMAT0003297_MirBase_miR-628-3p_microRNA	UUGUUAAAAUUUAUUG	UCUAGUAAGAGUGGCAGUCGA	-3.46
MIMAT0003885_MirBase_miR-454_microRNA	CAAGCUUUGUUAAA	UAGUGCAAUAUUGCUUAUAGGGU	-3.45
MIMAT0004504_MirBase_miR-31*_microRNA	AUUGUUUUUAUGUGUGUU	UGCUAUGCCAACAUAUUGCCAU	-3.45
MIMAT0000088_MirBase_miR-30a*_microRNA	ACAAUUGGAACUGUAACUUUG	CUUUCAGUCGGAUGUUUGCAGC	-3.44
MIMAT0002804_MirBase_miR-488*_microRNA	AUAAACCUAUUGUU	CCCAGAUAAUGGCACUCUCAA	-3.44
MIMAT0003150_MirBase_miR-455-5p_microRNA	AAACTATTTTTAGAGATACT	UAUGUGCCUUUGGACUACAUCG	-3.44
MIMAT0004767_MirBase_miR-193b*_microRNA	AUUGUUUUUAUGUGUGUU	CGGGGUUUUGAGGGCGAGAUGA	-3.44
MIMAT0005825_MirBase_miR-1180_microRNA	AUUGUUUUUAUGUGUGUU	UUUCCGGCUCGCGUGGGUGUGU	-3.44
MIMAT0000068_MirBase_miR-15a_microRNA	UUUAAUUUUUCACAAAUAUUAC	UAGCAGCACAUAAUGGUUUGUG	-3.43
MIMAT0000425_MirBase_miR-130a_microRNA	CACAUGCUUUUCCA	CAGUGCAAUGUUAAAAGGGCAU	-3.43
MIMAT0000067_MirBase_let-7f_microRNA	UCUUGUCUGUUAAUC	UGAGGUAGUAGAUUGUAUAGUU	-3.42
MIMAT0000414_MirBase_let-7g_microRNA	AAAUGAUUGCUCAA	UGAGGUAGUAGUUUGUACAGUU	-3.4
MIMAT0000732_MirBase_miR-378_microRNA	AUAAGAAACCUGCUUCAA	ACUGGACUUGGAGUCAGAAGG	-3.4
MIMAT0005930_MirBase_miR-1276_microRNA	UUUUACAAUUAAUUG	UAAAGAGCCCUGUGGAGACA	-3.4
MIMAT0000449_MirBase_miR-146a_microRNA	AUUGUUUUUAUGUGUGUU	UGAGAACUGAAUUCCAUGGGUU	-3.39
MIMAT0003297_MirBase_miR-628-3p_microRNA	CUUUACUUGCUUUACA	UCUAGUAAGAGUGGCAGUCGA	-3.39
MIMAT0004515_MirBase_miR-29b-2*_microRNA	GAAAUUAAAUUGGCAAA	CUGGUUUCACAUGGUGGCUUAG	-3.39
MIMAT0004679_MirBase_miR-296-3p_microRNA	AAUCAUCAUCUAAA	GAGGGUUGGGUGGAGGCUCUCC	-3.39
MIMAT0004688_MirBase_miR-374a*_microRNA	UUGUACUAAUUAUAUGCCUUAUUUCUU	CUUAUCAGAUUGUAUUGUAAUU	-3.39
MIMAT0004983_MirBase_miR-940_microRNA	CUGUCUUUAUUUCACCUUAUAAUU	AAGGCAGGGCCCCCGCUCCCC	-3.39
MIMAT0000417_MirBase_miR-15b_microRNA	ACAAUUGGAACUGUAACUUUG	UAGCAGCACAUCAUGGUUUACA	-3.38
MIMAT0000424_MirBase_miR-128_microRNA	UUGUUAAAAUUUAUUG	UCACAGUGAACCGGUCUCUUU	-3.38
MIMAT0003885_MirBase_miR-454_microRNA	UGUAUUAAUGCUAAC	UAGUGCAAUAUUGCUUAUAGGGU	-3.38
MIMAT0016847_MirBase_miR-378c_microRNA	AAACTATTTTTAGAGATACT	ACUGGACUUGGAGUCAGAAGAGUGG	-3.38
MIMAT0000431_MirBase_miR-140-5p_microRNA	AAACTATTTTTAGAGATACT	CAGUGGUUUUACCCUAUGGUAG	-3.37
MIMAT0005792_MirBase_miR-320b_microRNA	GAGAAUUUGACUAAAG	AAAAGCUGGGUUGAGAGGGCAA	-3.37
MIMAT0000510_MirBase_miR-320a_microRNA	GAGAAUUUGACUAAAG	AAAAGCUGGGUUGAGAGGGCGA	-3.35
MIMAT0000255_MirBase_miR-34a_microRNA	ACAAUUGGAACUGUAACUUUG	UGGCAGUGUCUUAGCUGGUUGU	-3.34
MIMAT0000617_MirBase_miR-200c_microRNA	CUUUACUUGCUUUACA	UAAUACUGCCGGGUAAUGAUGGA	-3.33
MIMAT0002809_MirBase_miR-146b-5p_microRNA	GAGAAUUUGACUAAAG	UGAGAACUGAAUUCCAUAGGCU	-3.33
MIMAT0000075_MirBase_miR-20a_microRNA	ACAAUUGGAACUGUAACUUUG	UAAAGUGCUUAUAGUGCAGGUAG	-3.32
MIMAT0004589_MirBase_miR-30b*_microRNA	CUUUACUUGCUUUACA	CUGGGAGGUGGAUGUUUACUUC	-3.32
MIMAT0000066_MirBase_let-7e_microRNA	UAUUCUGUUAUUUACUUGUAC	UGAGGUAGGAGGUUGUAUAGUU	-3.31
MIMAT0000261_MirBase_miR-183_microRNA	UUUAUUACCCUGACA	UAUGGCACUGGUAGAAUUCACU	-3.31
MIMAT0000418_MirBase_miR-23b_microRNA	UUAAAAAUCUGAAUUCUUC	AUCACAUUGCCAGGGAUUACC	-3.31
MIMAT0003886_MirBase_miR-769-5p_microRNA	ACAAUUGGAACUGUAACUUUG	UGAGACCUCUGGGUUCUGAGCU	-3.31
MIMAT0004491_MirBase_miR-19b-1*_microRNA	AUAAACCUAUUGUU	AGUUUUGCAGGUUUGCAUCCAGC	-3.31
MIMAT0004502_MirBase_miR-28-3p_microRNA	CACAAGUCAAACAAAUUUACAAA	CACUAGAUUGUGAGCUCCUGGA	-3.3
MIMAT0000617_MirBase_miR-200c_microRNA	AUUUUUGUACUUGUUACU	UAAUACUGCCGGGUAAUGAUGGA	-3.29
MIMAT0000252_MirBase_miR-7_microRNA	AAAUGAUUGCUCAA	UGGAAGACUAGUGAUUUUGUUGU	-3.28
MIMAT0001412_MirBase_miR-18b_microRNA	AUUUUUGUACUUGUUACU	UAAGGUGCAUCUAGUGCAGUUAG	-3.28
MIMAT0000261_MirBase_miR-183_microRNA	UAUUCUGUUAUUUACUUGUAC	UAUGGCACUGGUAGAAUUCACU	-3.27
MIMAT0004555_MirBase_miR-10a*_microRNA	UAAAAUGAAUUAUC	CAAAUUCGUAUCUAGGGGAAUA	-3.27
MIMAT0004597_MirBase_miR-140-3p_microRNA	AAUAAUUAAUCUUGUACAA	UACCACAGGGUAGAACCACGG	-3.27
MIMAT0000617_MirBase_miR-200c_microRNA	UCUUGUCUGUUAAUC	UAAUACUGCCGGGUAAUGAUGGA	-3.26
MIMAT0002804_MirBase_miR-488*_microRNA	UAUUCUGUUAUUUACUUGUAC	CCCAGAUAAUGGCACUCUCAA	-3.26
MIMAT0004672_MirBase_miR-106b*_microRNA	CUUUACUUGCUUUACA	CCGCACUGUGGGUACUUGCUGC	-3.26
MIMAT0000431_MirBase_miR-140-5p_microRNA	UUAAAAAUUACAGAA	CAGUGGUUUUACCCUAUGGUAG	-3.25
MIMAT0000693_MirBase_miR-30e*_microRNA	AATGGGTGAATGATTT	CUUUCAGUCGGAUGUUUACAGC	-3.24
MIMAT0004496_MirBase_miR-23a*_microRNA	UAUUGAAUAUCCUAUAA	GGGGUUCCUGGGGAUGGGAUUU	-3.24
MIMAT0001080_MirBase_miR-196b_microRNA	AAAUGAUUGCUCAA	UAGGUAGUUUCCUGUUGUUGGG	-3.23
MIMAT0004955_MirBase_miR-374b_microRNA	UUGUACUAAUUAUAUGCCUUAUUUCUU	AUAUAAUACAACCUGCUAAGUG	-3.23
MIMAT0000688_MirBase_miR-301a_microRNA	AUUUUUGUACUUGUUACU	CAGUGCAAUAGUAUUGUCAAAGC	-3.22
MIMAT0004491_MirBase_miR-19b-1*_microRNA	UUAAAAAUCUGAAUUCUUC	AGUUUUGCAGGUUUGCAUCCAGC	-3.22
MIMAT0001340_MirBase_miR-423-3p_microRNA	UUUACUCAACCGCUACUUUAGAC	AGCUCGGUCUGAGGCCCCUCAGU	-3.21
MIMAT0000068_MirBase_miR-15a_microRNA	UUACAAACAAUUUGAUACUU	UAGCAGCACAUAAUGGUUUGUG	-3.2
MIMAT0000256_MirBase_miR-181a_microRNA	GAAAUUAAAUUGGCAAA	AACAUUCAACGCUGUCGGUGAGU	-3.2
MIMAT0004555_MirBase_miR-10a*_microRNA	UUAAAAAUCUGAAUUCUUC	CAAAUUCGUAUCUAGGGGAAUA	-3.2
MIMAT0004773_MirBase_miR-500a_microRNA	AAUCAUCAUCUAAA	UAAUCCUUGCUACCUGGGUGAGA	-3.2
MIMAT0000254_MirBase_miR-10b_microRNA	AUUGUUUUUAUGUGUGUU	UACCCUGUAGAACCGAAUUUGUG	-3.19
MIMAT0000430_MirBase_miR-138_microRNA	CACAAGUCAAACAAAUUUACAAA	AGCUGGUGUUGUGAAUCAGGCCG	-3.19
MIMAT0001080_MirBase_miR-196b_microRNA	AAACTATTTTTAGAGATACT	UAGGUAGUUUCCUGUUGUUGGG	-3.19
MIMAT0002888_MirBase_miR-532-5p_microRNA	AAAUGAUUGCUCAA	CAUGCCUUGAGUGUAGGACCGU	-3.19
MIMAT0004597_MirBase_miR-140-3p_microRNA	CAAGCUUUGUUAAA	UACCACAGGGUAGAACCACGG	-3.19
MIMAT0004958_MirBase_miR-301b_microRNA	AUACAAUGUAACAC	CAGUGCAAUGAUAUUGUCAAAGC	-3.19
MIMAT0005793_MirBase_miR-320c_microRNA	GAGAAUUUGACUAAAG	AAAAGCUGGGUUGAGAGGGU	-3.19
MIMAT0015072_MirBase_miR-320e_microRNA	GAGAAUUUGACUAAAG	AAAGCUGGGUUGAGAAGG	-3.19
MIMAT0000441_MirBase_miR-9_microRNA	AAUAAUUAAUCUUGUACAA	UCUUUGGUUAUCUAGCUGUAUGA	-3.18
MIMAT0003258_MirBase_miR-590-5p_microRNA	AAACTATTTTTAGAGATACT	GAGCUUAUUCAUAAAAGUGCAG	-3.18
MIMAT0004682_MirBase_miR-361-3p_microRNA	UUAAAAAUUACAGAA	UCCCCCAGGUGUGAUUCUGAUUU	-3.18
MIMAT0004682_MirBase_miR-361-3p_microRNA	AACACGTTTGAAAT	UCCCCCAGGUGUGAUUCUGAUUU	-3.16
MIMAT0000080_MirBase_miR-24_microRNA	UUAAAAAUCUGAAUUCUUC	UGGCUCAGUUCAGCAGGAACAG	-3.15
MIMAT0004568_MirBase_miR-221*_microRNA	AAUUUGCUGAUGAUU	ACCUGGCAUACAAUGUAGAUUU	-3.15
MIMAT0000074_MirBase_miR-19b_microRNA	UUGUGCAAACUUUA	UGUGCAAAUCCAUGCAAAACUGA	-3.14
MIMAT0000252_MirBase_miR-7_microRNA	UUUAAUUUUUCACAAAUAUUAC	UGGAAGACUAGUGAUUUUGUUGU	-3.13
MIMAT0000257_MirBase_miR-181b_microRNA	CGAAUACCAUAAUGAAU	AACAUUCAUUGCUGUCGGUGGGU	-3.13
MIMAT0000417_MirBase_miR-15b_microRNA	AAACTATTTTTAGAGATACT	UAGCAGCACAUCAUGGUUUACA	-3.13
MIMAT0000727_MirBase_miR-374a_microRNA	UUGUUAAAAUUUAUUG	UUAUAAUACAACCUGAUAAGUG	-3.13
MIMAT0004767_MirBase_miR-193b*_microRNA	UUAAAAAUCUGAAUUCUUC	CGGGGUUUUGAGGGCGAGAUGA	-3.13
MIMAT0000259_MirBase_miR-182_microRNA	UUUAUUACCCUGACA	UUUGGCAAUGGUAGAACUCACACU	-3.12
MIMAT0005825_MirBase_miR-1180_microRNA	UUGUACUAAUUAUAUGCCUUAUUUCUU	UUUCCGGCUCGCGUGGGUGUGU	-3.12
MIMAT0000073_MirBase_miR-19a_microRNA	UUGUGCAAACUUUA	UGUGCAAAUCUAUGCAAAACUGA	-3.11
MIMAT0000065_MirBase_let-7d_microRNA	UUGUUAAAAUUUAUUG	AGAGGUAGUAGGUUGCAUAGUU	-3.1
MIMAT0000415_MirBase_let-7i_microRNA	CUGUCUUUAUUUCACCUUAUAAUU	UGAGGUAGUAGUUUGUGCUGUU	-3.1
MIMAT0000430_MirBase_miR-138_microRNA	CGAAUACCAUAAUGAAU	AGCUGGUGUUGUGAAUCAGGCCG	-3.09
MIMAT0002820_MirBase_miR-497_microRNA	UUCCAAAAUCAUAA	CAGCAGCACACUGUGGUUUGU	-3.08
MIMAT0000252_MirBase_miR-7_microRNA	GAAAUUAAAUUGGCAAA	UGGAAGACUAGUGAUUUUGUUGU	-3.07
MIMAT0003294_MirBase_miR-625_microRNA	UUUAAUUUUUCACAAAUAUUAC	AGGGGGAAAGUUCUAUAGUCC	-3.07
MIMAT0000617_MirBase_miR-200c_microRNA	AUAAACCUAUUGUU	UAAUACUGCCGGGUAAUGAUGGA	-3.06
MIMAT0001343_MirBase_miR-425*_microRNA	UUGUACUAAUUAUAUGCCUUAUUUCUU	AUCGGGAAUGUCGUGUCCGCCC	-3.06
MIMAT0007881_MirBase_miR-1908_microRNA	UCUUGUCUGUUAAUC	CGGCGGGGACGGCGAUUGGUC	-3.06
MIMAT0000093_MirBase_miR-93_microRNA	GAAATGAACGAAATGT	CAAAGUGCUGUUCGUGCAGGUAG	-3.05
MIMAT0000422_MirBase_miR-124_microRNA	UAUUCUGUUAUUUACUUGUAC	UAAGGCACGCGGUGAAUGCC	-3.05
MIMAT0000459_MirBase_miR-193a-3p_microRNA	AUUUUUGUACUUGUUACU	AACUGGCCUACAAAGUCCCAGU	-3.05
MIMAT0000761_MirBase_miR-324-5p_microRNA	AAUUUGCUGAUGAUU	CGCAUCCCCUAGGGCAUUGGUGU	-3.05
MIMAT0005793_MirBase_miR-320c_microRNA	UUUAAUUUUUCACAAAUAUUAC	AAAAGCUGGGUUGAGAGGGU	-3.05
MIMAT0000066_MirBase_let-7e_microRNA	AUUGUUUUUAUGUGUGUU	UGAGGUAGGAGGUUGUAUAGUU	-3.04
MIMAT0000095_MirBase_miR-96_microRNA	GAAATGAACGAAATGT	UUUGGCACUAGCACAUUUUUGCU	-3.04
MIMAT0016847_MirBase_miR-378c_microRNA	AUAAGAAACCUGCUUCAA	ACUGGACUUGGAGUCAGAAGAGUGG	-3.02
MIMAT0000078_MirBase_miR-23a_microRNA	UAAUUCUUUCACAC	AUCACAUUGCCAGGGAUUUCC	-3
MIMAT0000441_MirBase_miR-9_microRNA	UUGUGCAAACUUUA	UCUUUGGUUAUCUAGCUGUAUGA	-3
MIMAT0004568_MirBase_miR-221*_microRNA	UUAAAAAUCUGAAUUCUUC	ACCUGGCAUACAAUGUAGAUUU	-3
MIMAT0004810_MirBase_miR-629_microRNA	UCAAGAAAUUCAAC	UGGGUUUACGUUGGGAGAACU	-3
MIMAT0000259_MirBase_miR-182_microRNA	ACAACAUGUUAAAAACUGUUUA	UUUGGCAAUGGUAGAACUCACACU	-2.99
MIMAT0000416_MirBase_miR-1_microRNA	UAUUCUGUUAUUUACUUGUAC	UGGAAUGUAAAGAAGUAUGUAU	-2.99
MIMAT0001618_MirBase_miR-191*_microRNA	AATGGGTGAATGATTT	GCUGCGCUUGGAUUUCGUCCCC	-2.99
MIMAT0004496_MirBase_miR-23a*_microRNA	AAAGAACUUCACAACUGCUC	GGGGUUCCUGGGGAUGGGAUUU	-2.99
MIMAT0000091_MirBase_miR-33a_microRNA	ACAAUUGGAACUGUAACUUUG	GUGCAUUGUAGUUGCAUUGCA	-2.98
MIMAT0005797_MirBase_miR-1301_microRNA	UUGUACUAAUUAUAUGCCUUAUUUCUU	UUGCAGCUGCCUGGGAGUGACUUC	-2.98
MIMAT0005891_MirBase_miR-1303_microRNA	UAUUCUGUUAUUUACUUGUAC	UUUAGAGACGGGGUCUUGCUCU	-2.98
MIMAT0004496_MirBase_miR-23a*_microRNA	UCUUGUCUGUUAAUC	GGGGUUCCUGGGGAUGGGAUUU	-2.96
MIMAT0002821_MirBase_miR-181d_microRNA	AATGGGTGAATGATTT	AACAUUCAUUGUUGUCGGUGGGU	-2.95
MIMAT0004488_MirBase_miR-15a*_microRNA	CGAAUACCAUAAUGAAU	CAGGCCAUAUUGUGCUGCCUCA	-2.95
MIMAT0000090_MirBase_miR-32_microRNA	AUUGUUUUUAUGUGUGUU	UAUUGCACAUUACUAAGUUGCA	-2.94
MIMAT0002888_MirBase_miR-532-5p_microRNA	AUUUUUGUACUUGUUACU	CAUGCCUUGAGUGUAGGACCGU	-2.94
MIMAT0003242_MirBase_miR-577_microRNA	UAAUAUUACAAACU	UAGAUAAAAUAUUGGUACCUG	-2.94
MIMAT0004694_MirBase_miR-342-5p_microRNA	AATGGGTGAATGATTT	AGGGGUGCUAUCUGUGAUUGA	-2.94
MIMAT0000414_MirBase_let-7g_microRNA	AUAAACCUAUUGUU	UGAGGUAGUAGUUUGUACAGUU	-2.93
MIMAT0000078_MirBase_miR-23a_microRNA	AUUUUUGUACUUGUUACU	AUCACAUUGCCAGGGAUUUCC	-2.92
MIMAT0000082_MirBase_miR-26a_microRNA	UUGUACUAAUUAUAUGCCUUAUUUCUU	UUCAAGUAAUCCAGGAUAGGCU	-2.92
MIMAT0004673_MirBase_miR-29c*_microRNA	UCAAGAAAUUCAAC	UGACCGAUUUCUCCUGGUGUUC	-2.92
MIMAT0004767_MirBase_miR-193b*_microRNA	CAAGCUUUGUUAAA	CGGGGUUUUGAGGGCGAGAUGA	-2.91
MIMAT0005792_MirBase_miR-320b_microRNA	AUUGUUUUUAUGUGUGUU	AAAAGCUGGGUUGAGAGGGCAA	-2.91
MIMAT0003880_MirBase_miR-671-5p_microRNA	ACACCUAUCCUUCU	AGGAAGCCCUGGAGGGGCUGGAG	-2.9
MIMAT0004549_MirBase_miR-148a*_microRNA	GAGAAUUUGACUAAAG	AAAGUUCUGAGACACUCCGACU	-2.9
MIMAT0004958_MirBase_miR-301b_microRNA	UUACAAACAAUUUGAUACUU	CAGUGCAAUGAUAUUGUCAAAGC	-2.9
MIMAT0018183_MirBase_miR-3909_microRNA	AAACTATTTTTAGAGATACT	UGUCCUCUAGGGCCUGCAGUCU	-2.9
MIMAT0002872_MirBase_miR-501-5p_microRNA	AAAUGAUUGCUCAA	AAUCCUUUGUCCCUGGGUGAGA	-2.89
MIMAT0004694_MirBase_miR-342-5p_microRNA	CACAUGCUUUUCCA	AGGGGUGCUAUCUGUGAUUGA	-2.89
MIMAT0000688_MirBase_miR-301a_microRNA	UUGUACUAAUUAUAUGCCUUAUUUCUU	CAGUGCAAUAGUAUUGUCAAAGC	-2.88
MIMAT0004681_MirBase_miR-26a-2*_microRNA	GAAATGAACGAAATGT	CCUAUUCUUGAUUACUUGUUUC	-2.88
MIMAT0000418_MirBase_miR-23b_microRNA	UUUAAUUUUUCACAAAUAUUAC	AUCACAUUGCCAGGGAUUACC	-2.86
MIMAT0004589_MirBase_miR-30b*_microRNA	UAUUCUGUUAUUUACUUGUAC	CUGGGAGGUGGAUGUUUACUUC	-2.86
MIMAT0000262_MirBase_miR-187_microRNA	UAAACGAACAUGAAAAUU	UCGUGUCUUGUGUUGCAGCCGG	-2.85
MIMAT0004767_MirBase_miR-193b*_microRNA	UUGUUAAAAUUUAUUG	CGGGGUUUUGAGGGCGAGAUGA	-2.85
MIMAT0000693_MirBase_miR-30e*_microRNA	UUUAAUUUUUCACAAAUAUUAC	CUUUCAGUCGGAUGUUUACAGC	-2.84
MIMAT0004612_MirBase_miR-186*_microRNA	CACAAGUCAAACAAAUUUACAAA	GCCCAAAGGUGAAUUUUUUGGG	-2.84
MIMAT0003312_MirBase_miR-642a_microRNA	ACAACAUGUUAAAAACUGUUUA	GUCCCUCUCCAAAUGUGUCUUG	-2.83
MIMAT0000281_MirBase_miR-224_microRNA	AAAUGAUUGCUCAA	CAAGUCACUAGUGGUUCCGUU	-2.82
MIMAT0004679_MirBase_miR-296-3p_microRNA	ACUCAAUUACCCCCUGCA	GAGGGUUGGGUGGAGGCUCUCC	-2.82
MIMAT0004926_MirBase_miR-708_microRNA	CAAGCUUUGUUAAA	AAGGAGCUUACAAUCUAGCUGGG	-2.81
MIMAT0000688_MirBase_miR-301a_microRNA	AUAAACCUAUUGUU	CAGUGCAAUAGUAUUGUCAAAGC	-2.8
MIMAT0000256_MirBase_miR-181a_microRNA	CUUUACUUGCUUUACA	AACAUUCAACGCUGUCGGUGAGU	-2.79
MIMAT0003297_MirBase_miR-628-3p_microRNA	CACAUGCUUUUCCA	UCUAGUAAGAGUGGCAGUCGA	-2.79
MIMAT0004809_MirBase_miR-628-5p_microRNA	UUAGAUAUAUGAAUUCA	AUGCUGACAUAUUUACUAGAGG	-2.79
MIMAT0000252_MirBase_miR-7_microRNA	UAAAAUGAAUUAUC	UGGAAGACUAGUGAUUUUGUUGU	-2.78
MIMAT0005951_MirBase_miR-1307_microRNA	AAUUUGCUGAUGAUU	ACUCGGCGUGGCGUCGGUCGUG	-2.78
MIMAT0000080_MirBase_miR-24_microRNA	AUUUUUGUACUUGUUACU	UGGCUCAGUUCAGCAGGAACAG	-2.77
MIMAT0000415_MirBase_let-7i_microRNA	UUAAAAAUUACAGAA	UGAGGUAGUAGUUUGUGCUGUU	-2.77
MIMAT0001341_MirBase_miR-424_microRNA	UAAAAUGAAUUAUC	CAGCAGCAAUUCAUGUUUUGAA	-2.77
MIMAT0004602_MirBase_miR-125a-3p_microRNA	UCUUGUCUGUUAAUC	ACAGGUGAGGUUCUUGGGAGCC	-2.76
MIMAT0005938_MirBase_miR-1274b_microRNA	UUAAAAAUCUGAAUUCUUC	UCCCUGUUCGGGCGCCA	-2.76
MIMAT0004682_MirBase_miR-361-3p_microRNA	ACAAUUGGAACUGUAACUUUG	UCCCCCAGGUGUGAUUCUGAUUU	-2.74
MIMAT0000414_MirBase_let-7g_microRNA	ACAACAUGUUAAAAACUGUUUA	UGAGGUAGUAGUUUGUACAGUU	-2.73
MIMAT0000416_MirBase_miR-1_microRNA	AAACTATTTTTAGAGATACT	UGGAAUGUAAAGAAGUAUGUAU	-2.73
MIMAT0004682_MirBase_miR-361-3p_microRNA	UUGUACUAAUUAUAUGCCUUAUUUCUU	UCCCCCAGGUGUGAUUCUGAUUU	-2.73
MIMAT0000262_MirBase_miR-187_microRNA	ACAACAUGUUAAAAACUGUUUA	UCGUGUCUUGUGUUGCAGCCGG	-2.72
MIMAT0000281_MirBase_miR-224_microRNA	CTTTAATTTAACCGTTT	CAAGUCACUAGUGGUUCCGUU	-2.72
MIMAT0001080_MirBase_miR-196b_microRNA	AAUUUGCUGAUGAUU	UAGGUAGUUUCCUGUUGUUGGG	-2.72
MIMAT0003885_MirBase_miR-454_microRNA	AATGGGTGAATGATTT	UAGUGCAAUAUUGCUUAUAGGGU	-2.71
MIMAT0000418_MirBase_miR-23b_microRNA	AUUUUUGUACUUGUUACU	AUCACAUUGCCAGGGAUUACC	-2.7
MIMAT0000703_MirBase_miR-361-5p_microRNA	UUGUACUAAUUAUAUGCCUUAUUUCUU	UUAUCAGAAUCUCCAGGGGUAC	-2.7
MIMAT0004672_MirBase_miR-106b*_microRNA	AUUUUUGUACUUGUUACU	CCGCACUGUGGGUACUUGCUGC	-2.7
MIMAT0004767_MirBase_miR-193b*_microRNA	UCAAGAAAUUCAAC	CGGGGUUUUGAGGGCGAGAUGA	-2.7
MIMAT0000680_MirBase_miR-106b_microRNA	UUUACUCAACCGCUACUUUAGAC	UAAAGUGCUGACAGUGCAGAU	-2.69
MIMAT0000068_MirBase_miR-15a_microRNA	AAACTATTTTTAGAGATACT	UAGCAGCACAUAAUGGUUUGUG	-2.68
MIMAT0000431_MirBase_miR-140-5p_microRNA	AAAUGAUUGCUCAA	CAGUGGUUUUACCCUAUGGUAG	-2.68
MIMAT0000510_MirBase_miR-320a_microRNA	AUUGUUUUUAUGUGUGUU	AAAAGCUGGGUUGAGAGGGCGA	-2.68
MIMAT0002820_MirBase_miR-497_microRNA	CACAAGUCAAACAAAUUUACAAA	CAGCAGCACACUGUGGUUUGU	-2.68
MIMAT0004776_MirBase_miR-505*_microRNA	UAAUAUUACAAACU	GGGAGCCAGGAAGUAUUGAUGU	-2.68
MIMAT0004809_MirBase_miR-628-5p_microRNA	UAUUGAAUAUCCUAUAA	AUGCUGACAUAUUUACUAGAGG	-2.68
MIMAT0000415_MirBase_let-7i_microRNA	AAACTATTTTTAGAGATACT	UGAGGUAGUAGUUUGUGCUGUU	-2.66
MIMAT0001080_MirBase_miR-196b_microRNA	UUAAAAAUUACAGAA	UAGGUAGUUUCCUGUUGUUGGG	-2.66
MIMAT0001341_MirBase_miR-424_microRNA	UCUUGAAACUGCUCAA	CAGCAGCAAUUCAUGUUUUGAA	-2.66
MIMAT0007881_MirBase_miR-1908_microRNA	AAUUUGCUGAUGAUU	CGGCGGGGACGGCGAUUGGUC	-2.66
MIMAT0004958_MirBase_miR-301b_microRNA	UAAUAUUACAAACU	CAGUGCAAUGAUAUUGUCAAAGC	-2.65
MIMAT0000071_MirBase_miR-17*_microRNA	CUUUACUUGCUUUACA	ACUGCAGUGAAGGCACUUGUAG	-2.63
MIMAT0016847_MirBase_miR-378c_microRNA	CUUUACUUGCUUUACA	ACUGGACUUGGAGUCAGAAGAGUGG	-2.63
MIMAT0000095_MirBase_miR-96_microRNA	ACAACAUGUUAAAAACUGUUUA	UUUGGCACUAGCACAUUUUUGCU	-2.62
MIMAT0000417_MirBase_miR-15b_microRNA	UAAAAUGAAUUAUC	UAGCAGCACAUCAUGGUUUACA	-2.62
MIMAT0002820_MirBase_miR-497_microRNA	CCAUACCCACAAAUUUUAC	CAGCAGCACACUGUGGUUUGU	-2.61
MIMAT0004549_MirBase_miR-148a*_microRNA	AAACTATTTTTAGAGATACT	AAAGUUCUGAGACACUCCGACU	-2.61
MIMAT0004673_MirBase_miR-29c*_microRNA	UAUUGAAUAUCCUAUAA	UGACCGAUUUCUCCUGGUGUUC	-2.61
MIMAT0004681_MirBase_miR-26a-2*_microRNA	AAUAAUUAAUCUUGUACAA	CCUAUUCUUGAUUACUUGUUUC	-2.61
MIMAT0001618_MirBase_miR-191*_microRNA	UUAAAAAUCUGAAUUCUUC	GCUGCGCUUGGAUUUCGUCCCC	-2.6
MIMAT0005891_MirBase_miR-1303_microRNA	AUUGUUUUUAUGUGUGUU	UUUAGAGACGGGGUCUUGCUCU	-2.6
MIMAT0007881_MirBase_miR-1908_microRNA	CUGUCUUUAUUUCACCUUAUAAUU	CGGCGGGGACGGCGAUUGGUC	-2.6
MIMAT0000258_MirBase_miR-181c_microRNA	UUACCCACUUACUAAA	AACAUUCAACCUGUCGGUGAGU	-2.59
MIMAT0000727_MirBase_miR-374a_microRNA	CAAGCUUUGUUAAA	UUAUAAUACAACCUGAUAAGUG	-2.59
MIMAT0007881_MirBase_miR-1908_microRNA	AAAUGAUUGCUCAA	CGGCGGGGACGGCGAUUGGUC	-2.59
MIMAT0000257_MirBase_miR-181b_microRNA	GAAAUUAAAUUGGCAAA	AACAUUCAUUGCUGUCGGUGGGU	-2.58
MIMAT0000431_MirBase_miR-140-5p_microRNA	CTTTAATTTAACCGTTT	CAGUGGUUUUACCCUAUGGUAG	-2.58
MIMAT0000457_MirBase_miR-188-5p_microRNA	UAAUUCUUUCACAC	CAUCCCUUGCAUGGUGGAGGG	-2.58
MIMAT0004506_MirBase_miR-33a*_microRNA	GAAATGAACGAAATGT	CAAUGUUUCCACAGUGCAUCAC	-2.57
MIMAT0000449_MirBase_miR-146a_microRNA	GAGAAUUUGACUAAAG	UGAGAACUGAAUUCCAUGGGUU	-2.56
MIMAT0003884_MirBase_miR-454*_microRNA	UAAUAUUACAAACU	ACCCUAUCAAUAUUGUCUCUGC	-2.56
MIMAT0004682_MirBase_miR-361-3p_microRNA	CACAUGCUUUUCCA	UCCCCCAGGUGUGAUUCUGAUUU	-2.56
MIMAT0000414_MirBase_let-7g_microRNA	UAUUCUGUUAUUUACUUGUAC	UGAGGUAGUAGUUUGUACAGUU	-2.55
MIMAT0004682_MirBase_miR-361-3p_microRNA	UAAAAUGAAUUAUC	UCCCCCAGGUGUGAUUCUGAUUU	-2.55
MIMAT0001080_MirBase_miR-196b_microRNA	UAAAAUGAAUUAUC	UAGGUAGUUUCCUGUUGUUGGG	-2.54
MIMAT0000065_MirBase_let-7d_microRNA	AUUGUUUUUAUGUGUGUU	AGAGGUAGUAGGUUGCAUAGUU	-2.52
MIMAT0000703_MirBase_miR-361-5p_microRNA	CACAUGCUUUUCCA	UUAUCAGAAUCUCCAGGGGUAC	-2.52
MIMAT0004810_MirBase_miR-629_microRNA	UUAGAUAUAUGAAUUCA	UGGGUUUACGUUGGGAGAACU	-2.52
MIMAT0004491_MirBase_miR-19b-1*_microRNA	CAAGCUUUGUUAAA	AGUUUUGCAGGUUUGCAUCCAGC	-2.51
MIMAT0000100_MirBase_miR-29b_microRNA	AAACTATTTTTAGAGATACT	UAGCACCAUUUGAAAUCAGUGUU	-2.5
MIMAT0002872_MirBase_miR-501-5p_microRNA	CUUUACUUGCUUUACA	AAUCCUUUGUCCCUGGGUGAGA	-2.5
MIMAT0000091_MirBase_miR-33a_microRNA	ACUCAAUUACCCCCUGCA	GUGCAUUGUAGUUGCAUUGCA	-2.49
MIMAT0007892_MirBase_miR-1915_microRNA	CUUUACUUGCUUUACA	CCCCAGGGCGACGCGGCGGG	-2.49
MIMAT0000226_MirBase_miR-196a_microRNA	UUUGAUAAAAAUCUCUAUGA	UAGGUAGUUUCAUGUUGUUGGG	-2.48
MIMAT0000067_MirBase_let-7f_microRNA	AUAAACCUAUUGUU	UGAGGUAGUAGAUUGUAUAGUU	-2.47
MIMAT0003242_MirBase_miR-577_microRNA	UAUUCUGUUAUUUACUUGUAC	UAGAUAAAAUAUUGGUACCUG	-2.47
MIMAT0004679_MirBase_miR-296-3p_microRNA	UAACCUUAACUUGC	GAGGGUUGGGUGGAGGCUCUCC	-2.47
MIMAT0005825_MirBase_miR-1180_microRNA	CACAUGCUUUUCCA	UUUCCGGCUCGCGUGGGUGUGU	-2.46
MIMAT0004810_MirBase_miR-629_microRNA	UUAAAAAUCUGAAUUCUUC	UGGGUUUACGUUGGGAGAACU	-2.45
MIMAT0000460_MirBase_miR-194_microRNA	AUUGUUUUUAUGUGUGUU	UGUAACAGCAACUCCAUGUGGA	-2.44
MIMAT0001080_MirBase_miR-196b_microRNA	CUUUACUUGCUUUACA	UAGGUAGUUUCCUGUUGUUGGG	-2.44
MIMAT0004679_MirBase_miR-296-3p_microRNA	UAUUCUGUUAUUUACUUGUAC	GAGGGUUGGGUGGAGGCUCUCC	-2.44
MIMAT0004985_MirBase_miR-942_microRNA	ACAAUUGGAACUGUAACUUUG	UCUUCUCUGUUUUGGCCAUGUG	-2.44
MIMAT0000071_MirBase_miR-17*_microRNA	CACAUGCUUUUCCA	ACUGCAGUGAAGGCACUUGUAG	-2.42
MIMAT0000688_MirBase_miR-301a_microRNA	GAAAUUAAAUUGGCAAA	CAGUGCAAUAGUAUUGUCAAAGC	-2.42
MIMAT0004491_MirBase_miR-19b-1*_microRNA	CACAAGUCAAACAAAUUUACAAA	AGUUUUGCAGGUUUGCAUCCAGC	-2.42
MIMAT0001080_MirBase_miR-196b_microRNA	UAUUCUGUUAUUUACUUGUAC	UAGGUAGUUUCCUGUUGUUGGG	-2.41
MIMAT0000080_MirBase_miR-24_microRNA	AUUGUUUUUAUGUGUGUU	UGGCUCAGUUCAGCAGGAACAG	-2.4
MIMAT0004958_MirBase_miR-301b_microRNA	AAUUUGCUGAUGAUU	CAGUGCAAUGAUAUUGUCAAAGC	-2.4
MIMAT0000691_MirBase_miR-130b_microRNA	AUUGUUUUUAUGUGUGUU	CAGUGCAAUGAUGAAAGGGCAU	-2.39
MIMAT0000751_MirBase_miR-330-3p_microRNA	AUUUUUGUACUUGUUACU	GCAAAGCACACGGCCUGCAGAGA	-2.39
MIMAT0004491_MirBase_miR-19b-1*_microRNA	AAUUUGCUGAUGAUU	AGUUUUGCAGGUUUGCAUCCAGC	-2.39
MIMAT0004679_MirBase_miR-296-3p_microRNA	UUUGAUAAAAAUCUCUAUGA	GAGGGUUGGGUGGAGGCUCUCC	-2.39
MIMAT0004985_MirBase_miR-942_microRNA	UUAAAAAGUUGAAGAA	UCUUCUCUGUUUUGGCCAUGUG	-2.39
MIMAT0000069_MirBase_miR-16_microRNA	UAAUAUUACAAACU	UAGCAGCACGUAAAUAUUGGCG	-2.35
MIMAT0000732_MirBase_miR-378_microRNA	UUUACUCAACCGCUACUUUAGAC	ACUGGACUUGGAGUCAGAAGG	-2.35
MIMAT0004949_MirBase_miR-877_microRNA	AUUGUUUUUAUGUGUGUU	GUAGAGGAGAUGGCGCAGGG	-2.33
MIMAT0000461_MirBase_miR-195_microRNA	UAAUAUUACAAACU	UAGCAGCACAGAAAUAUUGGC	-2.32
MIMAT0005891_MirBase_miR-1303_microRNA	AAUAAUUAAUCUUGUACAA	UUUAGAGACGGGGUCUUGCUCU	-2.32
MIMAT0000222_MirBase_miR-192_microRNA	UUACAAACAAUUUGAUACUU	CUGACCUAUGAAUUGACAGCC	-2.31
MIMAT0001412_MirBase_miR-18b_microRNA	ACAAUUGGAACUGUAACUUUG	UAAGGUGCAUCUAGUGCAGUUAG	-2.31
MIMAT0000063_MirBase_let-7b_microRNA	ACAAUUGGAACUGUAACUUUG	UGAGGUAGUAGGUUGUGUGGUU	-2.3
MIMAT0003297_MirBase_miR-628-3p_microRNA	AUUGUUUUUAUGUGUGUU	UCUAGUAAGAGUGGCAGUCGA	-2.3
MIMAT0000096_MirBase_miR-98_microRNA	ACAAUUGGAACUGUAACUUUG	UGAGGUAGUAAGUUGUAUUGUU	-2.29
MIMAT0000068_MirBase_miR-15a_microRNA	UAUUCUGUUAUUUACUUGUAC	UAGCAGCACAUAAUGGUUUGUG	-2.28
MIMAT0002871_MirBase_miR-500a*_microRNA	AUUUUUGUACUUGUUACU	AUGCACCUGGGCAAGGAUUCUG	-2.28
MIMAT0004555_MirBase_miR-10a*_microRNA	UAAUUCUUUCACAC	CAAAUUCGUAUCUAGGGGAAUA	-2.27
MIMAT0000063_MirBase_let-7b_microRNA	ACAACAUGUUAAAAACUGUUUA	UGAGGUAGUAGGUUGUGUGGUU	-2.26
MIMAT0000254_MirBase_miR-10b_microRNA	UAAAAUGAAUUAUC	UACCCUGUAGAACCGAAUUUGUG	-2.25
MIMAT0003242_MirBase_miR-577_microRNA	CUGUCUUUAUUUCACCUUAUAAUU	UAGAUAAAAUAUUGGUACCUG	-2.25
MIMAT0000430_MirBase_miR-138_microRNA	ACAACAUGUUAAAAACUGUUUA	AGCUGGUGUUGUGAAUCAGGCCG	-2.24
MIMAT0004555_MirBase_miR-10a*_microRNA	UUGUACUAAUUAUAUGCCUUAUUUCUU	CAAAUUCGUAUCUAGGGGAAUA	-2.24
MIMAT0004767_MirBase_miR-193b*_microRNA	UUGUACUAAUUAUAUGCCUUAUUUCUU	CGGGGUUUUGAGGGCGAGAUGA	-2.23
MIMAT0000441_MirBase_miR-9_microRNA	AAACTATTTTTAGAGATACT	UCUUUGGUUAUCUAGCUGUAUGA	-2.22
MIMAT0001412_MirBase_miR-18b_microRNA	AAAUGAUUGCUCAA	UAAGGUGCAUCUAGUGCAGUUAG	-2.22
MIMAT0004487_MirBase_let-7f-2*_microRNA	AAACTATTTTTAGAGATACT	CUAUACAGUCUACUGUCUUUCC	-2.22
MIMAT0004555_MirBase_miR-10a*_microRNA	AAACTATTTTTAGAGATACT	CAAAUUCGUAUCUAGGGGAAUA	-2.22
MIMAT0004672_MirBase_miR-106b*_microRNA	UAUUCUGUUAUUUACUUGUAC	CCGCACUGUGGGUACUUGCUGC	-2.22
MIMAT0000252_MirBase_miR-7_microRNA	CGAAUACCAUAAUGAAU	UGGAAGACUAGUGAUUUUGUUGU	-2.21
MIMAT0002821_MirBase_miR-181d_microRNA	GAAAUUAAAUUGGCAAA	AACAUUCAUUGUUGUCGGUGGGU	-2.21
MIMAT0000062_MirBase_let-7a_microRNA	UUAGAUAUAUGAAUUCA	UGAGGUAGUAGGUUGUAUAGUU	-2.2
MIMAT0000253_MirBase_miR-10a_microRNA	UAAAAUGAAUUAUC	UACCCUGUAGAUCCGAAUUUGUG	-2.2
MIMAT0002874_MirBase_miR-503_microRNA	AUUGUUUUUAUGUGUGUU	UAGCAGCGGGAACAGUUCUGCAG	-2.2
MIMAT0000067_MirBase_let-7f_microRNA	UUAGAUAUAUGAAUUCA	UGAGGUAGUAGAUUGUAUAGUU	-2.18
MIMAT0000255_MirBase_miR-34a_microRNA	GAAAUUAAAUUGGCAAA	UGGCAGUGUCUUAGCUGGUUGU	-2.18
MIMAT0000064_MirBase_let-7c_microRNA	ACAACAUGUUAAAAACUGUUUA	UGAGGUAGUAGGUUGUAUGGUU	-2.17
MIMAT0000222_MirBase_miR-192_microRNA	UUUAAUUUUUCACAAAUAUUAC	CUGACCUAUGAAUUGACAGCC	-2.17
MIMAT0000457_MirBase_miR-188-5p_microRNA	CUGUCUUUAUUUCACCUUAUAAUU	CAUCCCUUGCAUGGUGGAGGG	-2.17
MIMAT0002820_MirBase_miR-497_microRNA	UCUUGAAACUGCUCAA	CAGCAGCACACUGUGGUUUGU	-2.17
MIMAT0015378_MirBase_miR-3065-3p_microRNA	AUACAAUGUAACAC	UCAGCACCAGGAUAUUGUUGGAG	-2.17
MIMAT0000727_MirBase_miR-374a_microRNA	UUUAUUACCCUGACA	UUAUAAUACAACCUGAUAAGUG	-2.16
MIMAT0000071_MirBase_miR-17*_microRNA	UAAUUCUUUCACAC	ACUGCAGUGAAGGCACUUGUAG	-2.15
MIMAT0000276_MirBase_miR-219-5p_microRNA	AAUUUGCUGAUGAUU	UGAUUGUCCAAACGCAAUUCU	-2.14
MIMAT0004507_MirBase_miR-92a-1*_microRNA	GAGAAUUUGACUAAAG	AGGUUGGGAUCGGUUGCAAUGCU	-2.12
MIMAT0000062_MirBase_let-7a_microRNA	ACAACAUGUUAAAAACUGUUUA	UGAGGUAGUAGGUUGUAUAGUU	-2.11
MIMAT0003886_MirBase_miR-769-5p_microRNA	AAACTATTTTTAGAGATACT	UGAGACCUCUGGGUUCUGAGCU	-2.11
MIMAT0004502_MirBase_miR-28-3p_microRNA	UCAAUUUAAACACC	CACUAGAUUGUGAGCUCCUGGA	-2.11
MIMAT0005892_MirBase_miR-1304_microRNA	UCUUGAAACUGCUCAA	UUUGAGGCUACAGUGAGAUGUG	-2.11
MIMAT0000068_MirBase_miR-15a_microRNA	UUCCAAAAUCAUAA	UAGCAGCACAUAAUGGUUUGUG	-2.1
MIMAT0000088_MirBase_miR-30a*_microRNA	AATGGGTGAATGATTT	CUUUCAGUCGGAUGUUUGCAGC	-2.09
MIMAT0005927_MirBase_miR-1274a_microRNA	UAUUGAAUAUCCUAUAA	GUCCCUGUUCAGGCGCCA	-2.09
MIMAT0000242_MirBase_miR-129-5p_microRNA	UUAAAAAGUUGAAGAA	CUUUUUGCGGUCUGGGCUUGC	-2.08
MIMAT0002872_MirBase_miR-501-5p_microRNA	AATGGGTGAATGATTT	AAUCCUUUGUCCCUGGGUGAGA	-2.07
MIMAT0000076_MirBase_miR-21_microRNA	UAAUAUUACAAACU	UAGCUUAUCAGACUGAUGUUGA	-2.05
MIMAT0000083_MirBase_miR-26b_microRNA	UUGUUAAAAUUUAUUG	UUCAAGUAAUUCAGGAUAGGU	-2.04
MIMAT0000455_MirBase_miR-185_microRNA	UUUAAUUUUUCACAAAUAUUAC	UGGAGAGAAAGGCAGUUCCUGA	-2.04
MIMAT0000415_MirBase_let-7i_microRNA	UAAAAUGAAUUAUC	UGAGGUAGUAGUUUGUGCUGUU	-2.03
MIMAT0000457_MirBase_miR-188-5p_microRNA	AAUCAUCAUCUAAA	CAUCCCUUGCAUGGUGGAGGG	-2.03
MIMAT0000680_MirBase_miR-106b_microRNA	CUUUACUUGCUUUACA	UAAAGUGCUGACAGUGCAGAU	-2.03
MIMAT0005892_MirBase_miR-1304_microRNA	UUGUUAAAAUUUAUUG	UUUGAGGCUACAGUGAGAUGUG	-2
MIMAT0000441_MirBase_miR-9_microRNA	UUAAAAAGUUGAAGAA	UCUUUGGUUAUCUAGCUGUAUGA	-1.99
MIMAT0015072_MirBase_miR-320e_microRNA	UUACAAACAAUUUGAUACUU	AAAGCUGGGUUGAGAAGG	-1.99
MIMAT0000083_MirBase_miR-26b_microRNA	AACACGTTTGAAAT	UUCAAGUAAUUCAGGAUAGGU	-1.96
MIMAT0015069_MirBase_miR-3187_microRNA	UUUGAUAAAAAUCUCUAUGA	UUGGCCAUGGGGCUGCGCGG	-1.94
MIMAT0000510_MirBase_miR-320a_microRNA	UUUAAUUUUUCACAAAUAUUAC	AAAAGCUGGGUUGAGAGGGCGA	-1.92
MIMAT0000691_MirBase_miR-130b_microRNA	UUUAAUUUUUCACAAAUAUUAC	CAGUGCAAUGAUGAAAGGGCAU	-1.92
MIMAT0000756_MirBase_miR-326_microRNA	AAACTATTTTTAGAGATACT	CCUCUGGGCCCUUCCUCCAG	-1.92
MIMAT0000278_MirBase_miR-221_microRNA	UUAGAUAUAUGAAUUCA	AGCUACAUUGUCUGCUGGGUUUC	-1.91
MIMAT0000415_MirBase_let-7i_microRNA	AAAUGAUUGCUCAA	UGAGGUAGUAGUUUGUGCUGUU	-1.91
MIMAT0000688_MirBase_miR-301a_microRNA	UGUAUUAAUGCUAAC	CAGUGCAAUAGUAUUGUCAAAGC	-1.9
MIMAT0003297_MirBase_miR-628-3p_microRNA	UUUAUUACCCUGACA	UCUAGUAAGAGUGGCAGUCGA	-1.9
MIMAT0005792_MirBase_miR-320b_microRNA	UUUAAUUUUUCACAAAUAUUAC	AAAAGCUGGGUUGAGAGGGCAA	-1.9
MIMAT0000255_MirBase_miR-34a_microRNA	AAAGAACUUCACAACUGCUC	UGGCAGUGUCUUAGCUGGUUGU	-1.89
MIMAT0000276_MirBase_miR-219-5p_microRNA	UUUUACAAUUAAUUG	UGAUUGUCCAAACGCAAUUCU	-1.88
MIMAT0011163_MirBase_miR-548q_microRNA	CUUUACUUGCUUUACA	GCUGGUGCAAAAGUAAUGGCGG	-1.88
MIMAT0000063_MirBase_let-7b_microRNA	UUAGAUAUAUGAAUUCA	UGAGGUAGUAGGUUGUGUGGUU	-1.87
MIMAT0000257_MirBase_miR-181b_microRNA	CCAAUGGAAAAACUCAA	AACAUUCAUUGCUGUCGGUGGGU	-1.86
MIMAT0000261_MirBase_miR-183_microRNA	UCUUGUCUGUUAAUC	UAUGGCACUGGUAGAAUUCACU	-1.86
MIMAT0005797_MirBase_miR-1301_microRNA	CUGUCUUUAUUUCACCUUAUAAUU	UUGCAGCUGCCUGGGAGUGACUUC	-1.86
MIMAT0000456_MirBase_miR-186_microRNA	AACACGTTTGAAAT	CAAAGAAUUCUCCUUUUGGGCU	-1.84
MIMAT0004568_MirBase_miR-221*_microRNA	UUGUUAAAAUUUAUUG	ACCUGGCAUACAAUGUAGAUUU	-1.84
MIMAT0002871_MirBase_miR-500a*_microRNA	UAAUUCUUUCACAC	AUGCACCUGGGCAAGGAUUCUG	-1.83
MIMAT0007892_MirBase_miR-1915_microRNA	AAUUUGCUGAUGAUU	CCCCAGGGCGACGCGGCGGG	-1.83
MIMAT0004682_MirBase_miR-361-3p_microRNA	AUUUUUGUACUUGUUACU	UCCCCCAGGUGUGAUUCUGAUUU	-1.82
MIMAT0000258_MirBase_miR-181c_microRNA	GAAAUUAAAUUGGCAAA	AACAUUCAACCUGUCGGUGAGU	-1.81
MIMAT0003886_MirBase_miR-769-5p_microRNA	GAGAAUUUGACUAAAG	UGAGACCUCUGGGUUCUGAGCU	-1.81
MIMAT0001080_MirBase_miR-196b_microRNA	GAAAUUAAAUUGGCAAA	UAGGUAGUUUCCUGUUGUUGGG	-1.79
MIMAT0005793_MirBase_miR-320c_microRNA	UUACAAACAAUUUGAUACUU	AAAAGCUGGGUUGAGAGGGU	-1.79
MIMAT0000064_MirBase_let-7c_microRNA	UUAGAUAUAUGAAUUCA	UGAGGUAGUAGGUUGUAUGGUU	-1.78
MIMAT0004945_MirBase_miR-744_microRNA	AAUAAUUAAUCUUGUACAA	UGCGGGGCUAGGGCUAACAGCA	-1.78
MIMAT0000460_MirBase_miR-194_microRNA	UUGUACUAAUUAUAUGCCUUAUUUCUU	UGUAACAGCAACUCCAUGUGGA	-1.77
MIMAT0004985_MirBase_miR-942_microRNA	UCUUGAAACUGCUCAA	UCUUCUCUGUUUUGGCCAUGUG	-1.77
MIMAT0000082_MirBase_miR-26a_microRNA	AACACGTTTGAAAT	UUCAAGUAAUCCAGGAUAGGCU	-1.76
MIMAT0004555_MirBase_miR-10a*_microRNA	UUUAAUUUUUCACAAAUAUUAC	CAAAUUCGUAUCUAGGGGAAUA	-1.76
MIMAT0001341_MirBase_miR-424_microRNA	GAAATGAACGAAATGT	CAGCAGCAAUUCAUGUUUUGAA	-1.75
MIMAT0004958_MirBase_miR-301b_microRNA	UUUAAUUUUUCACAAAUAUUAC	CAGUGCAAUGAUAUUGUCAAAGC	-1.74
MIMAT0000703_MirBase_miR-361-5p_microRNA	AUUUUUGUACUUGUUACU	UUAUCAGAAUCUCCAGGGGUAC	-1.73
MIMAT0000417_MirBase_miR-15b_microRNA	ACAACAUGUUAAAAACUGUUUA	UAGCAGCACAUCAUGGUUUACA	-1.72
MIMAT0000252_MirBase_miR-7_microRNA	UUGUUAAAAUUUAUUG	UGGAAGACUAGUGAUUUUGUUGU	-1.71
MIMAT0004679_MirBase_miR-296-3p_microRNA	AAAUGAUUGCUCAA	GAGGGUUGGGUGGAGGCUCUCC	-1.71
MIMAT0004612_MirBase_miR-186*_microRNA	UAUUCUGUUAUUUACUUGUAC	GCCCAAAGGUGAAUUUUUUGGG	-1.7
MIMAT0004776_MirBase_miR-505*_microRNA	AAACTATTTTTAGAGATACT	GGGAGCCAGGAAGUAUUGAUGU	-1.7
MIMAT0005797_MirBase_miR-1301_microRNA	CUUUACUUGCUUUACA	UUGCAGCUGCCUGGGAGUGACUUC	-1.7
MIMAT0000091_MirBase_miR-33a_microRNA	UUAAAAAUUACAGAA	GUGCAUUGUAGUUGCAUUGCA	-1.68
MIMAT0011163_MirBase_miR-548q_microRNA	CACAUGCUUUUCCA	GCUGGUGCAAAAGUAAUGGCGG	-1.68
MIMAT0000457_MirBase_miR-188-5p_microRNA	UUGUGCAAACUUUA	CAUCCCUUGCAUGGUGGAGGG	-1.67
MIMAT0000091_MirBase_miR-33a_microRNA	UAAUAUUACAAACU	GUGCAUUGUAGUUGCAUUGCA	-1.66
MIMAT0000688_MirBase_miR-301a_microRNA	UUUGAUAAAAAUCUCUAUGA	CAGUGCAAUAGUAUUGUCAAAGC	-1.66
MIMAT0002834_MirBase_miR-520a-3p_microRNA	AACACGTTTGAAAT	AAAGUGCUUCCCUUUGGACUGU	-1.65
MIMAT0000090_MirBase_miR-32_microRNA	UAACCUUAACUUGC	UAUUGCACAUUACUAAGUUGCA	-1.64
MIMAT0000069_MirBase_miR-16_microRNA	UCUUGUCUGUUAAUC	UAGCAGCACGUAAAUAUUGGCG	-1.61
MIMAT0003258_MirBase_miR-590-5p_microRNA	CACAUGCUUUUCCA	GAGCUUAUUCAUAAAAGUGCAG	-1.6
MIMAT0000430_MirBase_miR-138_microRNA	CUGUCUUUAUUUCACCUUAUAAUU	AGCUGGUGUUGUGAAUCAGGCCG	-1.59
MIMAT0000078_MirBase_miR-23a_microRNA	UUUAAUUUUUCACAAAUAUUAC	AUCACAUUGCCAGGGAUUUCC	-1.58
MIMAT0000103_MirBase_miR-106a_microRNA	UCUUGUCUGUUAAUC	AAAAGUGCUUACAGUGCAGGUAG	-1.57
MIMAT0000422_MirBase_miR-124_microRNA	UUGUUAAAAUUUAUUG	UAAGGCACGCGGUGAAUGCC	-1.57
MIMAT0004506_MirBase_miR-33a*_microRNA	UUUAAUUUUUCACAAAUAUUAC	CAAUGUUUCCACAGUGCAUCAC	-1.57
MIMAT0000070_MirBase_miR-17_microRNA	UCUUGUCUGUUAAUC	CAAAGUGCUUACAGUGCAGGUAG	-1.56
MIMAT0003150_MirBase_miR-455-5p_microRNA	AACACGTTTGAAAT	UAUGUGCCUUUGGACUACAUCG	-1.56
MIMAT0005891_MirBase_miR-1303_microRNA	AAACTATTTTTAGAGATACT	UUUAGAGACGGGGUCUUGCUCU	-1.55
MIMAT0000259_MirBase_miR-182_microRNA	UCUUGUCUGUUAAUC	UUUGGCAAUGGUAGAACUCACACU	-1.54
MIMAT0004810_MirBase_miR-629_microRNA	UUUAAUUUUUCACAAAUAUUAC	UGGGUUUACGUUGGGAGAACU	-1.54
MIMAT0001618_MirBase_miR-191*_microRNA	UUAGAUAUAUGAAUUCA	GCUGCGCUUGGAUUUCGUCCCC	-1.52
MIMAT0004609_MirBase_miR-149*_microRNA	AUUGUUUUUAUGUGUGUU	AGGGAGGGACGGGGGCUGUGC	-1.52
MIMAT0000278_MirBase_miR-221_microRNA	UUAAAAAUCUGAAUUCUUC	AGCUACAUUGUCUGCUGGGUUUC	-1.51
MIMAT0000431_MirBase_miR-140-5p_microRNA	UAAAAUGAAUUAUC	CAGUGGUUUUACCCUAUGGUAG	-1.51
MIMAT0000693_MirBase_miR-30e*_microRNA	UUAAAAAGUUGAAGAA	CUUUCAGUCGGAUGUUUACAGC	-1.51
MIMAT0004589_MirBase_miR-30b*_microRNA	AATGGGTGAATGATTT	CUGGGAGGUGGAUGUUUACUUC	-1.51
MIMAT0000075_MirBase_miR-20a_microRNA	UCUUGUCUGUUAAUC	UAAAGUGCUUAUAGUGCAGGUAG	-1.5
MIMAT0004507_MirBase_miR-92a-1*_microRNA	UCAAUUUAAACACC	AGGUUGGGAUCGGUUGCAAUGCU	-1.5
MIMAT0004678_MirBase_miR-99b*_microRNA	CACAAGUCAAACAAAUUUACAAA	CAAGCUCGUGUCUGUGGGUCCG	-1.5
MIMAT0000680_MirBase_miR-106b_microRNA	AUAAACCUAUUGUU	UAAAGUGCUGACAGUGCAGAU	-1.48
MIMAT0000456_MirBase_miR-186_microRNA	UUUAAUUUUUCACAAAUAUUAC	CAAAGAAUUCUCCUUUUGGGCU	-1.47
MIMAT0004792_MirBase_miR-92b*_microRNA	AUUGUUUUUAUGUGUGUU	AGGGACGGGACGCGGUGCAGUG	-1.46
MIMAT0001341_MirBase_miR-424_microRNA	UUGUUAAAAUUUAUUG	CAGCAGCAAUUCAUGUUUUGAA	-1.45
MIMAT0004612_MirBase_miR-186*_microRNA	UUAGAUAUAUGAAUUCA	GCCCAAAGGUGAAUUUUUUGGG	-1.45
MIMAT0004679_MirBase_miR-296-3p_microRNA	UUUAAUUUUUCACAAAUAUUAC	GAGGGUUGGGUGGAGGCUCUCC	-1.45
MIMAT0004957_MirBase_miR-760_microRNA	UUUUACAAUUAAUUG	CGGCUCUGGGUCUGUGGGGA	-1.45
MIMAT0000414_MirBase_let-7g_microRNA	UUAGAUAUAUGAAUUCA	UGAGGUAGUAGUUUGUACAGUU	-1.43
MIMAT0000088_MirBase_miR-30a*_microRNA	UUAAAAAGUUGAAGAA	CUUUCAGUCGGAUGUUUGCAGC	-1.41
MIMAT0000063_MirBase_let-7b_microRNA	UCUUGUCUGUUAAUC	UGAGGUAGUAGGUUGUGUGGUU	-1.4
MIMAT0000691_MirBase_miR-130b_microRNA	UUUAUUACCCUGACA	CAGUGCAAUGAUGAAAGGGCAU	-1.4
MIMAT0007881_MirBase_miR-1908_microRNA	AAUAAUUAAUCUUGUACAA	CGGCGGGGACGGCGAUUGGUC	-1.39
MIMAT0000090_MirBase_miR-32_microRNA	UUACAAACAAUUUGAUACUU	UAUUGCACAUUACUAAGUUGCA	-1.38
MIMAT0000072_MirBase_miR-18a_microRNA	UUUACUCAACCGCUACUUUAGAC	UAAGGUGCAUCUAGUGCAGAUAG	-1.37
MIMAT0000257_MirBase_miR-181b_microRNA	UAAAAUGAAUUAUC	AACAUUCAUUGCUGUCGGUGGGU	-1.37
MIMAT0002872_MirBase_miR-501-5p_microRNA	UUGUACUAAUUAUAUGCCUUAUUUCUU	AAUCCUUUGUCCCUGGGUGAGA	-1.37
MIMAT0000256_MirBase_miR-181a_microRNA	UAUUCUGUUAUUUACUUGUAC	AACAUUCAACGCUGUCGGUGAGU	-1.36
MIMAT0000461_MirBase_miR-195_microRNA	AAACTATTTTTAGAGATACT	UAGCAGCACAGAAAUAUUGGC	-1.36
MIMAT0004773_MirBase_miR-500a_microRNA	AAAUGAUUGCUCAA	UAAUCCUUGCUACCUGGGUGAGA	-1.36
MIMAT0000090_MirBase_miR-32_microRNA	UCAAUUUAAACACC	UAUUGCACAUUACUAAGUUGCA	-1.35
MIMAT0000688_MirBase_miR-301a_microRNA	UUACAAACAAUUUGAUACUU	CAGUGCAAUAGUAUUGUCAAAGC	-1.35
MIMAT0000083_MirBase_miR-26b_microRNA	AUUGUUUUUAUGUGUGUU	UUCAAGUAAUUCAGGAUAGGU	-1.34
MIMAT0003322_MirBase_miR-652_microRNA	UAAACAUAUAACUUCUA	AAUGGCGCCACUAGGGUUGUG	-1.34
MIMAT0003885_MirBase_miR-454_microRNA	UAAUAUUACAAACU	UAGUGCAAUAUUGCUUAUAGGGU	-1.34
MIMAT0004491_MirBase_miR-19b-1*_microRNA	GAGAAUUUGACUAAAG	AGUUUUGCAGGUUUGCAUCCAGC	-1.32
MIMAT0000064_MirBase_let-7c_microRNA	UCUUGUCUGUUAAUC	UGAGGUAGUAGGUUGUAUGGUU	-1.31
MIMAT0000414_MirBase_let-7g_microRNA	GAAAUUAAAUUGGCAAA	UGAGGUAGUAGUUUGUACAGUU	-1.31
MIMAT0004694_MirBase_miR-342-5p_microRNA	AAAUGAUUGCUCAA	AGGGGUGCUAUCUGUGAUUGA	-1.31
MIMAT0000068_MirBase_miR-15a_microRNA	ACAAUUGGAACUGUAACUUUG	UAGCAGCACAUAAUGGUUUGUG	-1.29
MIMAT0000710_MirBase_miR-365_microRNA	AUUUUUGUACUUGUUACU	UAAUGCCCCUAAAAAUCCUUAU	-1.29
MIMAT0000258_MirBase_miR-181c_microRNA	CUUUACUUGCUUUACA	AACAUUCAACCUGUCGGUGAGU	-1.28
MIMAT0000257_MirBase_miR-181b_microRNA	CUUUACUUGCUUUACA	AACAUUCAUUGCUGUCGGUGGGU	-1.27
MIMAT0002821_MirBase_miR-181d_microRNA	CUUUACUUGCUUUACA	AACAUUCAUUGUUGUCGGUGGGU	-1.27
MIMAT0004688_MirBase_miR-374a*_microRNA	AATGGGTGAATGATTT	CUUAUCAGAUUGUAUUGUAAUU	-1.26
MIMAT0004985_MirBase_miR-942_microRNA	UAAAAUGAAUUAUC	UCUUCUCUGUUUUGGCCAUGUG	-1.25
MIMAT0000062_MirBase_let-7a_microRNA	UCUUGUCUGUUAAUC	UGAGGUAGUAGGUUGUAUAGUU	-1.24
MIMAT0004776_MirBase_miR-505*_microRNA	UCUUGUCUGUUAAUC	GGGAGCCAGGAAGUAUUGAUGU	-1.24
MIMAT0005793_MirBase_miR-320c_microRNA	AAACTATTTTTAGAGATACT	AAAAGCUGGGUUGAGAGGGU	-1.22
MIMAT0015072_MirBase_miR-320e_microRNA	AAACTATTTTTAGAGATACT	AAAGCUGGGUUGAGAAGG	-1.22
MIMAT0000076_MirBase_miR-21_microRNA	UUUAAUUUUUCACAAAUAUUAC	UAGCUUAUCAGACUGAUGUUGA	-1.21
MIMAT0000441_MirBase_miR-9_microRNA	GAAAUUAAAUUGGCAAA	UCUUUGGUUAUCUAGCUGUAUGA	-1.21
MIMAT0002821_MirBase_miR-181d_microRNA	CCAAUGGAAAAACUCAA	AACAUUCAUUGUUGUCGGUGGGU	-1.21
MIMAT0004589_MirBase_miR-30b*_microRNA	UAAUUCUUUCACAC	CUGGGAGGUGGAUGUUUACUUC	-1.21
MIMAT0004612_MirBase_miR-186*_microRNA	AAUUUGCUGAUGAUU	GCCCAAAGGUGAAUUUUUUGGG	-1.21
MIMAT0000078_MirBase_miR-23a_microRNA	CCAUACCCACAAAUUUUAC	AUCACAUUGCCAGGGAUUUCC	-1.2
MIMAT0004597_MirBase_miR-140-3p_microRNA	CUUUACUUGCUUUACA	UACCACAGGGUAGAACCACGG	-1.2
MIMAT0000071_MirBase_miR-17*_microRNA	AUUGUUUUUAUGUGUGUU	ACUGCAGUGAAGGCACUUGUAG	-1.19
MIMAT0005825_MirBase_miR-1180_microRNA	CUUUACUUGCUUUACA	UUUCCGGCUCGCGUGGGUGUGU	-1.19
MIMAT0000067_MirBase_let-7f_microRNA	AATGGGTGAATGATTT	UGAGGUAGUAGAUUGUAUAGUU	-1.18
MIMAT0000096_MirBase_miR-98_microRNA	ACAACAUGUUAAAAACUGUUUA	UGAGGUAGUAAGUUGUAUUGUU	-1.18
MIMAT0000063_MirBase_let-7b_microRNA	UUGUGCAAACUUUA	UGAGGUAGUAGGUUGUGUGGUU	-1.15
MIMAT0002888_MirBase_miR-532-5p_microRNA	UUGUACUAAUUAUAUGCCUUAUUUCUU	CAUGCCUUGAGUGUAGGACCGU	-1.15
MIMAT0000226_MirBase_miR-196a_microRNA	UCUUGUCUGUUAAUC	UAGGUAGUUUCAUGUUGUUGGG	-1.14
MIMAT0004673_MirBase_miR-29c*_microRNA	UGUAUUAAUGCUAAC	UGACCGAUUUCUCCUGGUGUUC	-1.14
MIMAT0000093_MirBase_miR-93_microRNA	UUAGAUAUAUGAAUUCA	CAAAGUGCUGUUCGUGCAGGUAG	-1.12
MIMAT0000252_MirBase_miR-7_microRNA	UUAAAAAGUUGAAGAA	UGGAAGACUAGUGAUUUUGUUGU	-1.11
MIMAT0000425_MirBase_miR-130a_microRNA	UUUGAUAAAAAUCUCUAUGA	CAGUGCAAUGUUAAAAGGGCAU	-1.09
MIMAT0000077_MirBase_miR-22_microRNA	CTTTAATTTAACCGTTT	AAGCUGCCAGUUGAAGAACUGU	-1.06
MIMAT0002820_MirBase_miR-497_microRNA	AAACTATTTTTAGAGATACT	CAGCAGCACACUGUGGUUUGU	-1.04
MIMAT0004748_MirBase_miR-423-5p_microRNA	UUUAAUUUUUCACAAAUAUUAC	UGAGGGGCAGAGAGCGAGACUUU	-1.04
MIMAT0004507_MirBase_miR-92a-1*_microRNA	AAUAAUUAAUCUUGUACAA	AGGUUGGGAUCGGUUGCAAUGCU	-1.02
MIMAT0000431_MirBase_miR-140-5p_microRNA	ACAAUUGGAACUGUAACUUUG	CAGUGGUUUUACCCUAUGGUAG	-1.01
MIMAT0000441_MirBase_miR-9_microRNA	UUGUACUAAUUAUAUGCCUUAUUUCUU	UCUUUGGUUAUCUAGCUGUAUGA	-1.01
MIMAT0011163_MirBase_miR-548q_microRNA	UGUAUUAAUGCUAAC	GCUGGUGCAAAAGUAAUGGCGG	-1
MIMAT0000416_MirBase_miR-1_microRNA	ACAACAUGUUAAAAACUGUUUA	UGGAAUGUAAAGAAGUAUGUAU	-0.99
MIMAT0004773_MirBase_miR-500a_microRNA	CUUUACUUGCUUUACA	UAAUCCUUGCUACCUGGGUGAGA	-0.99
MIMAT0005892_MirBase_miR-1304_microRNA	AAACTATTTTTAGAGATACT	UUUGAGGCUACAGUGAGAUGUG	-0.99
MIMAT0015069_MirBase_miR-3187_microRNA	CAAGCUUUGUUAAA	UUGGCCAUGGGGCUGCGCGG	-0.99
MIMAT0000068_MirBase_miR-15a_microRNA	ACAACAUGUUAAAAACUGUUUA	UAGCAGCACAUAAUGGUUUGUG	-0.98
MIMAT0000425_MirBase_miR-130a_microRNA	UUACAAACAAUUUGAUACUU	CAGUGCAAUGUUAAAAGGGCAU	-0.98
MIMAT0003322_MirBase_miR-652_microRNA	AAUAAUUAAUCUUGUACAA	AAUGGCGCCACUAGGGUUGUG	-0.98
MIMAT0004515_MirBase_miR-29b-2*_microRNA	AUAAACCUAUUGUU	CUGGUUUCACAUGGUGGCUUAG	-0.98
MIMAT0004589_MirBase_miR-30b*_microRNA	UUGUACUAAUUAUAUGCCUUAUUUCUU	CUGGGAGGUGGAUGUUUACUUC	-0.98
MIMAT0004550_MirBase_miR-30c-2*_microRNA	UUUAAUUUUUCACAAAUAUUAC	CUGGGAGAAGGCUGUUUACUCU	-0.95
MIMAT0004612_MirBase_miR-186*_microRNA	UUGUUAAAAUUUAUUG	GCCCAAAGGUGAAUUUUUUGGG	-0.95
MIMAT0000063_MirBase_let-7b_microRNA	AATGGGTGAATGATTT	UGAGGUAGUAGGUUGUGUGGUU	-0.94
MIMAT0000096_MirBase_miR-98_microRNA	AATGGGTGAATGATTT	UGAGGUAGUAAGUUGUAUUGUU	-0.94
MIMAT0003339_MirBase_miR-421_microRNA	CTTTAATTTAACCGTTT	AUCAACAGACAUUAAUUGGGCGC	-0.93
MIMAT0005938_MirBase_miR-1274b_microRNA	UAUUGAAUAUCCUAUAA	UCCCUGUUCGGGCGCCA	-0.93
MIMAT0004776_MirBase_miR-505*_microRNA	ACAACAUGUUAAAAACUGUUUA	GGGAGCCAGGAAGUAUUGAUGU	-0.92
MIMAT0005892_MirBase_miR-1304_microRNA	AAUAAUUAAUCUUGUACAA	UUUGAGGCUACAGUGAGAUGUG	-0.92
MIMAT0015378_MirBase_miR-3065-3p_microRNA	CCAAUGGAAAAACUCAA	UCAGCACCAGGAUAUUGUUGGAG	-0.91
MIMAT0007881_MirBase_miR-1908_microRNA	CAAGCUUUGUUAAA	CGGCGGGGACGGCGAUUGGUC	-0.9
MIMAT0000066_MirBase_let-7e_microRNA	AATGGGTGAATGATTT	UGAGGUAGGAGGUUGUAUAGUU	-0.88
MIMAT0002874_MirBase_miR-503_microRNA	AAUUUGCUGAUGAUU	UAGCAGCGGGAACAGUUCUGCAG	-0.87
MIMAT0000431_MirBase_miR-140-5p_microRNA	AUAAACCUAUUGUU	CAGUGGUUUUACCCUAUGGUAG	-0.86
MIMAT0004693_MirBase_miR-330-5p_microRNA	UUAGAUAUAUGAAUUCA	UCUCUGGGCCUGUGUCUUAGGC	-0.86
MIMAT0002872_MirBase_miR-501-5p_microRNA	UAUUCUGUUAUUUACUUGUAC	AAUCCUUUGUCCCUGGGUGAGA	-0.85
MIMAT0000063_MirBase_let-7b_microRNA	AAUAAUUAAUCUUGUACAA	UGAGGUAGUAGGUUGUGUGGUU	-0.84
MIMAT0001341_MirBase_miR-424_microRNA	ACAAUUGGAACUGUAACUUUG	CAGCAGCAAUUCAUGUUUUGAA	-0.83
MIMAT0011163_MirBase_miR-548q_microRNA	UUUAUUACCCUGACA	GCUGGUGCAAAAGUAAUGGCGG	-0.83
MIMAT0004568_MirBase_miR-221*_microRNA	GAGAAUUUGACUAAAG	ACCUGGCAUACAAUGUAGAUUU	-0.81
MIMAT0000425_MirBase_miR-130a_microRNA	UAAUAUUACAAACU	CAGUGCAAUGUUAAAAGGGCAU	-0.8
MIMAT0004589_MirBase_miR-30b*_microRNA	UUUAAUUUUUCACAAAUAUUAC	CUGGGAGGUGGAUGUUUACUUC	-0.79
MIMAT0002872_MirBase_miR-501-5p_microRNA	UCUUGUCUGUUAAUC	AAUCCUUUGUCCCUGGGUGAGA	-0.78
MIMAT0003885_MirBase_miR-454_microRNA	AUUGUUUUUAUGUGUGUU	UAGUGCAAUAUUGCUUAUAGGGU	-0.78
MIMAT0004502_MirBase_miR-28-3p_microRNA	CTTTAATTTAACCGTTT	CACUAGAUUGUGAGCUCCUGGA	-0.78
MIMAT0000072_MirBase_miR-18a_microRNA	CUUUACUUGCUUUACA	UAAGGUGCAUCUAGUGCAGAUAG	-0.77
MIMAT0000245_MirBase_miR-30d_microRNA	AAACTATTTTTAGAGATACT	UGUAAACAUCCCCGACUGGAAG	-0.76
MIMAT0002834_MirBase_miR-520a-3p_microRNA	AAACTATTTTTAGAGATACT	AAAGUGCUUCCCUUUGGACUGU	-0.76
MIMAT0000064_MirBase_let-7c_microRNA	AATGGGTGAATGATTT	UGAGGUAGUAGGUUGUAUGGUU	-0.75
MIMAT0000457_MirBase_miR-188-5p_microRNA	UUUGAUAAAAAUCUCUAUGA	CAUCCCUUGCAUGGUGGAGGG	-0.75
MIMAT0002888_MirBase_miR-532-5p_microRNA	UAUUCUGUUAUUUACUUGUAC	CAUGCCUUGAGUGUAGGACCGU	-0.74
MIMAT0000062_MirBase_let-7a_microRNA	AATGGGTGAATGATTT	UGAGGUAGUAGGUUGUAUAGUU	-0.7
MIMAT0000082_MirBase_miR-26a_microRNA	AUUGUUUUUAUGUGUGUU	UUCAAGUAAUCCAGGAUAGGCU	-0.7
MIMAT0000691_MirBase_miR-130b_microRNA	CAAGCUUUGUUAAA	CAGUGCAAUGAUGAAAGGGCAU	-0.7
MIMAT0004983_MirBase_miR-940_microRNA	UAUUCUGUUAUUUACUUGUAC	AAGGCAGGGCCCCCGCUCCCC	-0.7
MIMAT0000075_MirBase_miR-20a_microRNA	AATGGGTGAATGATTT	UAAAGUGCUUAUAGUGCAGGUAG	-0.66
MIMAT0002804_MirBase_miR-488*_microRNA	AUUGUUUUUAUGUGUGUU	CCCAGAUAAUGGCACUCUCAA	-0.66
MIMAT0003322_MirBase_miR-652_microRNA	UUUUACAAUUAAUUG	AAUGGCGCCACUAGGGUUGUG	-0.66
MIMAT0000093_MirBase_miR-93_microRNA	UCUUGUCUGUUAAUC	CAAAGUGCUGUUCGUGCAGGUAG	-0.64
MIMAT0000065_MirBase_let-7d_microRNA	UCUUGUCUGUUAAUC	AGAGGUAGUAGGUUGCAUAGUU	-0.61
MIMAT0000425_MirBase_miR-130a_microRNA	AUUGUUUUUAUGUGUGUU	CAGUGCAAUGUUAAAAGGGCAU	-0.59
MIMAT0000067_MirBase_let-7f_microRNA	ACAACAUGUUAAAAACUGUUUA	UGAGGUAGUAGAUUGUAUAGUU	-0.58
MIMAT0000510_MirBase_miR-320a_microRNA	UUACAAACAAUUUGAUACUU	AAAAGCUGGGUUGAGAGGGCGA	-0.58
MIMAT0004612_MirBase_miR-186*_microRNA	CUUUACUUGCUUUACA	GCCCAAAGGUGAAUUUUUUGGG	-0.57
MIMAT0000077_MirBase_miR-22_microRNA	UUUAAUUUUUCACAAAUAUUAC	AAGCUGCCAGUUGAAGAACUGU	-0.56
MIMAT0015378_MirBase_miR-3065-3p_microRNA	UAAUAUUACAAACU	UCAGCACCAGGAUAUUGUUGGAG	-0.55
MIMAT0000095_MirBase_miR-96_microRNA	UUAAAAAUCUGAAUUCUUC	UUUGGCACUAGCACAUUUUUGCU	-0.53
MIMAT0000318_MirBase_miR-200b_microRNA	AUAAACCUAUUGUU	UAAUACUGCCUGGUAAUGAUGA	-0.53
MIMAT0005792_MirBase_miR-320b_microRNA	UUACAAACAAUUUGAUACUU	AAAAGCUGGGUUGAGAGGGCAA	-0.52
MIMAT0001080_MirBase_miR-196b_microRNA	UUUGAUAAAAAUCUCUAUGA	UAGGUAGUUUCCUGUUGUUGGG	-0.46
MIMAT0004491_MirBase_miR-19b-1*_microRNA	UCUUGAAACUGCUCAA	AGUUUUGCAGGUUUGCAUCCAGC	-0.46
MIMAT0004602_MirBase_miR-125a-3p_microRNA	UUGUGCAAACUUUA	ACAGGUGAGGUUCUUGGGAGCC	-0.46
MIMAT0000617_MirBase_miR-200c_microRNA	CAAGCUUUGUUAAA	UAAUACUGCCGGGUAAUGAUGGA	-0.42
MIMAT0005792_MirBase_miR-320b_microRNA	AAACTATTTTTAGAGATACT	AAAAGCUGGGUUGAGAGGGCAA	-0.42
MIMAT0000510_MirBase_miR-320a_microRNA	AAACTATTTTTAGAGATACT	AAAAGCUGGGUUGAGAGGGCGA	-0.4
MIMAT0003339_MirBase_miR-421_microRNA	UUUAAUUUUUCACAAAUAUUAC	AUCAACAGACAUUAAUUGGGCGC	-0.4
MIMAT0007881_MirBase_miR-1908_microRNA	UAUUCUGUUAUUUACUUGUAC	CGGCGGGGACGGCGAUUGGUC	-0.39
MIMAT0000415_MirBase_let-7i_microRNA	GAAAUUAAAUUGGCAAA	UGAGGUAGUAGUUUGUGCUGUU	-0.34
MIMAT0000255_MirBase_miR-34a_microRNA	UUUUACAAUUAAUUG	UGGCAGUGUCUUAGCUGGUUGU	-0.31
MIMAT0000071_MirBase_miR-17*_microRNA	UCUUUACCAACCACCACAAACCUCUAU	ACUGCAGUGAAGGCACUUGUAG	-0.28
MIMAT0004694_MirBase_miR-342-5p_microRNA	UUUUACAAUUAAUUG	AGGGGUGCUAUCUGUGAUUGA	-0.25
MIMAT0000688_MirBase_miR-301a_microRNA	AAUUUGCUGAUGAUU	CAGUGCAAUAGUAUUGUCAAAGC	-0.23
MIMAT0000417_MirBase_miR-15b_microRNA	GAAAUUAAAUUGGCAAA	UAGCAGCACAUCAUGGUUUACA	-0.21
MIMAT0003322_MirBase_miR-652_microRNA	UUACAAACAAUUUGAUACUU	AAUGGCGCCACUAGGGUUGUG	-0.2
MIMAT0002821_MirBase_miR-181d_microRNA	UAAAAUGAAUUAUC	AACAUUCAUUGUUGUCGGUGGGU	-0.19
MIMAT0004679_MirBase_miR-296-3p_microRNA	AAUAAUUAAUCUUGUACAA	GAGGGUUGGGUGGAGGCUCUCC	-0.19
MIMAT0004810_MirBase_miR-629_microRNA	UUGUUAAAAUUUAUUG	UGGGUUUACGUUGGGAGAACU	-0.18
MIMAT0003322_MirBase_miR-652_microRNA	UAUUCUGUUAUUUACUUGUAC	AAUGGCGCCACUAGGGUUGUG	-0.17
MIMAT0004491_MirBase_miR-19b-1*_microRNA	CCAUACCCACAAAUUUUAC	AGUUUUGCAGGUUUGCAUCCAGC	-0.17
MIMAT0000095_MirBase_miR-96_microRNA	UUAAAAAUUACAGAA	UUUGGCACUAGCACAUUUUUGCU	-0.16
MIMAT0000071_MirBase_miR-17*_microRNA	UUUAAUUUUUCACAAAUAUUAC	ACUGCAGUGAAGGCACUUGUAG	-0.13
MIMAT0000276_MirBase_miR-219-5p_microRNA	AAUAAUUAAUCUUGUACAA	UGAUUGUCCAAACGCAAUUCU	-0.13
MIMAT0000276_MirBase_miR-219-5p_microRNA	AATGGGTGAATGATTT	UGAUUGUCCAAACGCAAUUCU	-0.13
MIMAT0000278_MirBase_miR-221_microRNA	UUGUUAAAAUUUAUUG	AGCUACAUUGUCUGCUGGGUUUC	-0.12
MIMAT0004491_MirBase_miR-19b-1*_microRNA	ACAAUUGGAACUGUAACUUUG	AGUUUUGCAGGUUUGCAUCCAGC	-0.12
MIMAT0000103_MirBase_miR-106a_microRNA	CACAUGCUUUUCCA	AAAAGUGCUUACAGUGCAGGUAG	-0.09
MIMAT0000261_MirBase_miR-183_microRNA	UUGUUAAAAUUUAUUG	UAUGGCACUGGUAGAAUUCACU	-0.09
MIMAT0000441_MirBase_miR-9_microRNA	CACAAGUCAAACAAAUUUACAAA	UCUUUGGUUAUCUAGCUGUAUGA	-0.02
MIMAT0000449_MirBase_miR-146a_microRNA	UUGUUAAAAUUUAUUG	UGAGAACUGAAUUCCAUGGGUU	-0.02
MIMAT0005797_MirBase_miR-1301_microRNA	CACAUGCUUUUCCA	UUGCAGCUGCCUGGGAGUGACUUC	-0.01
MIMAT0000062_MirBase_let-7a_microRNA	CCAAUGGAAAAACUCAA	UGAGGUAGUAGGUUGUAUAGUU	0
MIMAT0000062_MirBase_let-7a_microRNA	ACUCAAUUACCCCCUGCA	UGAGGUAGUAGGUUGUAUAGUU	0
MIMAT0000062_MirBase_let-7a_microRNA	CGAAUACCAUAAUGAAU	UGAGGUAGUAGGUUGUAUAGUU	0
MIMAT0000062_MirBase_let-7a_microRNA	AAUCAUCAUCUAAA	UGAGGUAGUAGGUUGUAUAGUU	0
MIMAT0000062_MirBase_let-7a_microRNA	UUUAAUUUUUCACAAAUAUUAC	UGAGGUAGUAGGUUGUAUAGUU	0
MIMAT0000062_MirBase_let-7a_microRNA	CAAGCUUUGUUAAA	UGAGGUAGUAGGUUGUAUAGUU	0
MIMAT0000062_MirBase_let-7a_microRNA	UCUUUACCAACCACCACAAACCUCUAU	UGAGGUAGUAGGUUGUAUAGUU	0
MIMAT0000062_MirBase_let-7a_microRNA	CCAUACCCACAAAUUUUAC	UGAGGUAGUAGGUUGUAUAGUU	0
MIMAT0000062_MirBase_let-7a_microRNA	UAUUGAAUAUCCUAUAA	UGAGGUAGUAGGUUGUAUAGUU	0
MIMAT0000062_MirBase_let-7a_microRNA	UAAACGAACAUGAAAAUU	UGAGGUAGUAGGUUGUAUAGUU	0
MIMAT0000062_MirBase_let-7a_microRNA	UUCCAAAAUCAUAA	UGAGGUAGUAGGUUGUAUAGUU	0
MIMAT0000062_MirBase_let-7a_microRNA	UAAUAUUACAAACU	UGAGGUAGUAGGUUGUAUAGUU	0
MIMAT0000062_MirBase_let-7a_microRNA	UUAAAAAGUUGAAGAA	UGAGGUAGUAGGUUGUAUAGUU	0
MIMAT0000062_MirBase_let-7a_microRNA	UAAUUCUUUCACAC	UGAGGUAGUAGGUUGUAUAGUU	0
MIMAT0000062_MirBase_let-7a_microRNA	AUCCAUCAAAACCA	UGAGGUAGUAGGUUGUAUAGUU	0
MIMAT0000062_MirBase_let-7a_microRNA	ACACCUAUCCUUCU	UGAGGUAGUAGGUUGUAUAGUU	0
MIMAT0000062_MirBase_let-7a_microRNA	ACCAAACCAACCAUAUCCAA	UGAGGUAGUAGGUUGUAUAGUU	0
MIMAT0000062_MirBase_let-7a_microRNA	UUAAAAAUUACAGAA	UGAGGUAGUAGGUUGUAUAGUU	0
MIMAT0000062_MirBase_let-7a_microRNA	UAAAAUGAAUUAUC	UGAGGUAGUAGGUUGUAUAGUU	0
MIMAT0000062_MirBase_let-7a_microRNA	AAAGAACUUCACAACUGCUC	UGAGGUAGUAGGUUGUAUAGUU	0
MIMAT0000062_MirBase_let-7a_microRNA	GCUCUCACUCAACAUGG	UGAGGUAGUAGGUUGUAUAGUU	0
MIMAT0000062_MirBase_let-7a_microRNA	AAAUGAUUGCUCAA	UGAGGUAGUAGGUUGUAUAGUU	0
MIMAT0000062_MirBase_let-7a_microRNA	UUAAAAAUCUGAAUUCUUC	UGAGGUAGUAGGUUGUAUAGUU	0
MIMAT0000062_MirBase_let-7a_microRNA	GAGAAUUUGACUAAAG	UGAGGUAGUAGGUUGUAUAGUU	0
MIMAT0000062_MirBase_let-7a_microRNA	UCUUGAAACUGCUCAA	UGAGGUAGUAGGUUGUAUAGUU	0
MIMAT0000062_MirBase_let-7a_microRNA	GAAGAGCAACCAAUG	UGAGGUAGUAGGUUGUAUAGUU	0
MIMAT0000062_MirBase_let-7a_microRNA	UCAAGAAAUUCAAC	UGAGGUAGUAGGUUGUAUAGUU	0
MIMAT0000062_MirBase_let-7a_microRNA	UGUAUUAAUGCUAAC	UGAGGUAGUAGGUUGUAUAGUU	0
MIMAT0000062_MirBase_let-7a_microRNA	UGUCACUAAGAAAUCU	UGAGGUAGUAGGUUGUAUAGUU	0
MIMAT0000062_MirBase_let-7a_microRNA	AUUGUUUUUAUGUGUGUU	UGAGGUAGUAGGUUGUAUAGUU	0
MIMAT0000062_MirBase_let-7a_microRNA	CACAUGCUUUUCCA	UGAGGUAGUAGGUUGUAUAGUU	0
MIMAT0000062_MirBase_let-7a_microRNA	GAAAUUAAAUUGGCAAA	UGAGGUAGUAGGUUGUAUAGUU	0
MIMAT0000062_MirBase_let-7a_microRNA	UUUGAUAAAAAUCUCUAUGA	UGAGGUAGUAGGUUGUAUAGUU	0
MIMAT0000062_MirBase_let-7a_microRNA	AACACGTTTGAAAT	UGAGGUAGUAGGUUGUAUAGUU	0
MIMAT0000062_MirBase_let-7a_microRNA	GAAATGAACGAAATGT	UGAGGUAGUAGGUUGUAUAGUU	0
MIMAT0000063_MirBase_let-7b_microRNA	CCAAUGGAAAAACUCAA	UGAGGUAGUAGGUUGUGUGGUU	0
MIMAT0000063_MirBase_let-7b_microRNA	ACUCAAUUACCCCCUGCA	UGAGGUAGUAGGUUGUGUGGUU	0
MIMAT0000063_MirBase_let-7b_microRNA	CGAAUACCAUAAUGAAU	UGAGGUAGUAGGUUGUGUGGUU	0
MIMAT0000063_MirBase_let-7b_microRNA	AAUCAUCAUCUAAA	UGAGGUAGUAGGUUGUGUGGUU	0
MIMAT0000063_MirBase_let-7b_microRNA	UUUAAUUUUUCACAAAUAUUAC	UGAGGUAGUAGGUUGUGUGGUU	0
MIMAT0000063_MirBase_let-7b_microRNA	CAAGCUUUGUUAAA	UGAGGUAGUAGGUUGUGUGGUU	0
MIMAT0000063_MirBase_let-7b_microRNA	UCUUUACCAACCACCACAAACCUCUAU	UGAGGUAGUAGGUUGUGUGGUU	0
MIMAT0000063_MirBase_let-7b_microRNA	CCAUACCCACAAAUUUUAC	UGAGGUAGUAGGUUGUGUGGUU	0
MIMAT0000063_MirBase_let-7b_microRNA	UAUUGAAUAUCCUAUAA	UGAGGUAGUAGGUUGUGUGGUU	0
MIMAT0000063_MirBase_let-7b_microRNA	UAAACGAACAUGAAAAUU	UGAGGUAGUAGGUUGUGUGGUU	0
MIMAT0000063_MirBase_let-7b_microRNA	UAAUAUUACAAACU	UGAGGUAGUAGGUUGUGUGGUU	0
MIMAT0000063_MirBase_let-7b_microRNA	UUAAAAAGUUGAAGAA	UGAGGUAGUAGGUUGUGUGGUU	0
MIMAT0000063_MirBase_let-7b_microRNA	UAAUUCUUUCACAC	UGAGGUAGUAGGUUGUGUGGUU	0
MIMAT0000063_MirBase_let-7b_microRNA	AUCCAUCAAAACCA	UGAGGUAGUAGGUUGUGUGGUU	0
MIMAT0000063_MirBase_let-7b_microRNA	ACACCUAUCCUUCU	UGAGGUAGUAGGUUGUGUGGUU	0
MIMAT0000063_MirBase_let-7b_microRNA	UAAAAUGAAUUAUC	UGAGGUAGUAGGUUGUGUGGUU	0
MIMAT0000063_MirBase_let-7b_microRNA	GCUCUCACUCAACAUGG	UGAGGUAGUAGGUUGUGUGGUU	0
MIMAT0000063_MirBase_let-7b_microRNA	AAAUGAUUGCUCAA	UGAGGUAGUAGGUUGUGUGGUU	0
MIMAT0000063_MirBase_let-7b_microRNA	UUAAAAAUCUGAAUUCUUC	UGAGGUAGUAGGUUGUGUGGUU	0
MIMAT0000063_MirBase_let-7b_microRNA	GAGAAUUUGACUAAAG	UGAGGUAGUAGGUUGUGUGGUU	0
MIMAT0000063_MirBase_let-7b_microRNA	UCUUGAAACUGCUCAA	UGAGGUAGUAGGUUGUGUGGUU	0
MIMAT0000063_MirBase_let-7b_microRNA	GAAGAGCAACCAAUG	UGAGGUAGUAGGUUGUGUGGUU	0
MIMAT0000063_MirBase_let-7b_microRNA	UCAAGAAAUUCAAC	UGAGGUAGUAGGUUGUGUGGUU	0
MIMAT0000063_MirBase_let-7b_microRNA	UGUAUUAAUGCUAAC	UGAGGUAGUAGGUUGUGUGGUU	0
MIMAT0000063_MirBase_let-7b_microRNA	UGUCACUAAGAAAUCU	UGAGGUAGUAGGUUGUGUGGUU	0
MIMAT0000063_MirBase_let-7b_microRNA	AUUGUUUUUAUGUGUGUU	UGAGGUAGUAGGUUGUGUGGUU	0
MIMAT0000063_MirBase_let-7b_microRNA	CACAUGCUUUUCCA	UGAGGUAGUAGGUUGUGUGGUU	0
MIMAT0000063_MirBase_let-7b_microRNA	GAAAUUAAAUUGGCAAA	UGAGGUAGUAGGUUGUGUGGUU	0
MIMAT0000063_MirBase_let-7b_microRNA	UUUGAUAAAAAUCUCUAUGA	UGAGGUAGUAGGUUGUGUGGUU	0
MIMAT0000063_MirBase_let-7b_microRNA	AACACGTTTGAAAT	UGAGGUAGUAGGUUGUGUGGUU	0
MIMAT0000063_MirBase_let-7b_microRNA	GAAATGAACGAAATGT	UGAGGUAGUAGGUUGUGUGGUU	0
MIMAT0000064_MirBase_let-7c_microRNA	CCAAUGGAAAAACUCAA	UGAGGUAGUAGGUUGUAUGGUU	0
MIMAT0000064_MirBase_let-7c_microRNA	ACUCAAUUACCCCCUGCA	UGAGGUAGUAGGUUGUAUGGUU	0
MIMAT0000064_MirBase_let-7c_microRNA	CGAAUACCAUAAUGAAU	UGAGGUAGUAGGUUGUAUGGUU	0
MIMAT0000064_MirBase_let-7c_microRNA	AAUCAUCAUCUAAA	UGAGGUAGUAGGUUGUAUGGUU	0
MIMAT0000064_MirBase_let-7c_microRNA	UUUAAUUUUUCACAAAUAUUAC	UGAGGUAGUAGGUUGUAUGGUU	0
MIMAT0000064_MirBase_let-7c_microRNA	CAAGCUUUGUUAAA	UGAGGUAGUAGGUUGUAUGGUU	0
MIMAT0000064_MirBase_let-7c_microRNA	UCUUUACCAACCACCACAAACCUCUAU	UGAGGUAGUAGGUUGUAUGGUU	0
MIMAT0000064_MirBase_let-7c_microRNA	CCAUACCCACAAAUUUUAC	UGAGGUAGUAGGUUGUAUGGUU	0
MIMAT0000064_MirBase_let-7c_microRNA	UAUUGAAUAUCCUAUAA	UGAGGUAGUAGGUUGUAUGGUU	0
MIMAT0000064_MirBase_let-7c_microRNA	UAAACGAACAUGAAAAUU	UGAGGUAGUAGGUUGUAUGGUU	0
MIMAT0000064_MirBase_let-7c_microRNA	UAAUAUUACAAACU	UGAGGUAGUAGGUUGUAUGGUU	0
MIMAT0000064_MirBase_let-7c_microRNA	UUAAAAAGUUGAAGAA	UGAGGUAGUAGGUUGUAUGGUU	0
MIMAT0000064_MirBase_let-7c_microRNA	UAAUUCUUUCACAC	UGAGGUAGUAGGUUGUAUGGUU	0
MIMAT0000064_MirBase_let-7c_microRNA	AUCCAUCAAAACCA	UGAGGUAGUAGGUUGUAUGGUU	0
MIMAT0000064_MirBase_let-7c_microRNA	ACACCUAUCCUUCU	UGAGGUAGUAGGUUGUAUGGUU	0
MIMAT0000064_MirBase_let-7c_microRNA	UUAAAAAUUACAGAA	UGAGGUAGUAGGUUGUAUGGUU	0
MIMAT0000064_MirBase_let-7c_microRNA	UAAAAUGAAUUAUC	UGAGGUAGUAGGUUGUAUGGUU	0
MIMAT0000064_MirBase_let-7c_microRNA	AAAGAACUUCACAACUGCUC	UGAGGUAGUAGGUUGUAUGGUU	0
MIMAT0000064_MirBase_let-7c_microRNA	GCUCUCACUCAACAUGG	UGAGGUAGUAGGUUGUAUGGUU	0
MIMAT0000064_MirBase_let-7c_microRNA	AAAUGAUUGCUCAA	UGAGGUAGUAGGUUGUAUGGUU	0
MIMAT0000064_MirBase_let-7c_microRNA	UUAAAAAUCUGAAUUCUUC	UGAGGUAGUAGGUUGUAUGGUU	0
MIMAT0000064_MirBase_let-7c_microRNA	GAGAAUUUGACUAAAG	UGAGGUAGUAGGUUGUAUGGUU	0
MIMAT0000064_MirBase_let-7c_microRNA	UCUUGAAACUGCUCAA	UGAGGUAGUAGGUUGUAUGGUU	0
MIMAT0000064_MirBase_let-7c_microRNA	GAAGAGCAACCAAUG	UGAGGUAGUAGGUUGUAUGGUU	0
MIMAT0000064_MirBase_let-7c_microRNA	UCAAGAAAUUCAAC	UGAGGUAGUAGGUUGUAUGGUU	0
MIMAT0000064_MirBase_let-7c_microRNA	UGUAUUAAUGCUAAC	UGAGGUAGUAGGUUGUAUGGUU	0
MIMAT0000064_MirBase_let-7c_microRNA	UGUCACUAAGAAAUCU	UGAGGUAGUAGGUUGUAUGGUU	0
MIMAT0000064_MirBase_let-7c_microRNA	AUUGUUUUUAUGUGUGUU	UGAGGUAGUAGGUUGUAUGGUU	0
MIMAT0000064_MirBase_let-7c_microRNA	CACAUGCUUUUCCA	UGAGGUAGUAGGUUGUAUGGUU	0
MIMAT0000064_MirBase_let-7c_microRNA	GAAAUUAAAUUGGCAAA	UGAGGUAGUAGGUUGUAUGGUU	0
MIMAT0000064_MirBase_let-7c_microRNA	UUUGAUAAAAAUCUCUAUGA	UGAGGUAGUAGGUUGUAUGGUU	0
MIMAT0000064_MirBase_let-7c_microRNA	AACACGTTTGAAAT	UGAGGUAGUAGGUUGUAUGGUU	0
MIMAT0000064_MirBase_let-7c_microRNA	GAAATGAACGAAATGT	UGAGGUAGUAGGUUGUAUGGUU	0
MIMAT0000065_MirBase_let-7d_microRNA	CCAAUGGAAAAACUCAA	AGAGGUAGUAGGUUGCAUAGUU	0
MIMAT0000065_MirBase_let-7d_microRNA	ACUCAAUUACCCCCUGCA	AGAGGUAGUAGGUUGCAUAGUU	0
MIMAT0000065_MirBase_let-7d_microRNA	CGAAUACCAUAAUGAAU	AGAGGUAGUAGGUUGCAUAGUU	0
MIMAT0000065_MirBase_let-7d_microRNA	AAUCAUCAUCUAAA	AGAGGUAGUAGGUUGCAUAGUU	0
MIMAT0000065_MirBase_let-7d_microRNA	UUUAAUUUUUCACAAAUAUUAC	AGAGGUAGUAGGUUGCAUAGUU	0
MIMAT0000065_MirBase_let-7d_microRNA	CAAGCUUUGUUAAA	AGAGGUAGUAGGUUGCAUAGUU	0
MIMAT0000065_MirBase_let-7d_microRNA	UCUUUACCAACCACCACAAACCUCUAU	AGAGGUAGUAGGUUGCAUAGUU	0
MIMAT0000065_MirBase_let-7d_microRNA	CCAUACCCACAAAUUUUAC	AGAGGUAGUAGGUUGCAUAGUU	0
MIMAT0000065_MirBase_let-7d_microRNA	UAUUGAAUAUCCUAUAA	AGAGGUAGUAGGUUGCAUAGUU	0
MIMAT0000065_MirBase_let-7d_microRNA	UAAACGAACAUGAAAAUU	AGAGGUAGUAGGUUGCAUAGUU	0
MIMAT0000065_MirBase_let-7d_microRNA	UAAACAUAUAACUUCUA	AGAGGUAGUAGGUUGCAUAGUU	0
MIMAT0000065_MirBase_let-7d_microRNA	UUCCAAAAUCAUAA	AGAGGUAGUAGGUUGCAUAGUU	0
MIMAT0000065_MirBase_let-7d_microRNA	UAAUAUUACAAACU	AGAGGUAGUAGGUUGCAUAGUU	0
MIMAT0000065_MirBase_let-7d_microRNA	UUAAAAAGUUGAAGAA	AGAGGUAGUAGGUUGCAUAGUU	0
MIMAT0000065_MirBase_let-7d_microRNA	ACAACAUGUUAAAAACUGUUUA	AGAGGUAGUAGGUUGCAUAGUU	0
MIMAT0000065_MirBase_let-7d_microRNA	UAAUUCUUUCACAC	AGAGGUAGUAGGUUGCAUAGUU	0
MIMAT0000065_MirBase_let-7d_microRNA	AUCCAUCAAAACCA	AGAGGUAGUAGGUUGCAUAGUU	0
MIMAT0000065_MirBase_let-7d_microRNA	ACACCUAUCCUUCU	AGAGGUAGUAGGUUGCAUAGUU	0
MIMAT0000065_MirBase_let-7d_microRNA	ACCAAACCAACCAUAUCCAA	AGAGGUAGUAGGUUGCAUAGUU	0
MIMAT0000065_MirBase_let-7d_microRNA	UUAAAAAUUACAGAA	AGAGGUAGUAGGUUGCAUAGUU	0
MIMAT0000065_MirBase_let-7d_microRNA	UAAAAUGAAUUAUC	AGAGGUAGUAGGUUGCAUAGUU	0
MIMAT0000065_MirBase_let-7d_microRNA	AAAGAACUUCACAACUGCUC	AGAGGUAGUAGGUUGCAUAGUU	0
MIMAT0000065_MirBase_let-7d_microRNA	GCUCUCACUCAACAUGG	AGAGGUAGUAGGUUGCAUAGUU	0
MIMAT0000065_MirBase_let-7d_microRNA	UUUUACAAUUAAUUG	AGAGGUAGUAGGUUGCAUAGUU	0
MIMAT0000065_MirBase_let-7d_microRNA	AAAUGAUUGCUCAA	AGAGGUAGUAGGUUGCAUAGUU	0
MIMAT0000065_MirBase_let-7d_microRNA	UUAAAAAUCUGAAUUCUUC	AGAGGUAGUAGGUUGCAUAGUU	0
MIMAT0000065_MirBase_let-7d_microRNA	GAGAAUUUGACUAAAG	AGAGGUAGUAGGUUGCAUAGUU	0
MIMAT0000065_MirBase_let-7d_microRNA	UCUUGAAACUGCUCAA	AGAGGUAGUAGGUUGCAUAGUU	0
MIMAT0000065_MirBase_let-7d_microRNA	GAAGAGCAACCAAUG	AGAGGUAGUAGGUUGCAUAGUU	0
MIMAT0000065_MirBase_let-7d_microRNA	UCAAGAAAUUCAAC	AGAGGUAGUAGGUUGCAUAGUU	0
MIMAT0000065_MirBase_let-7d_microRNA	UGUAUUAAUGCUAAC	AGAGGUAGUAGGUUGCAUAGUU	0
MIMAT0000065_MirBase_let-7d_microRNA	UUAGAUAUAUGAAUUCA	AGAGGUAGUAGGUUGCAUAGUU	0
MIMAT0000065_MirBase_let-7d_microRNA	UGUCACUAAGAAAUCU	AGAGGUAGUAGGUUGCAUAGUU	0
MIMAT0000065_MirBase_let-7d_microRNA	AAUAAUUAAUCUUGUACAA	AGAGGUAGUAGGUUGCAUAGUU	0
MIMAT0000065_MirBase_let-7d_microRNA	GAAAUUAAAUUGGCAAA	AGAGGUAGUAGGUUGCAUAGUU	0
MIMAT0000065_MirBase_let-7d_microRNA	UUUGAUAAAAAUCUCUAUGA	AGAGGUAGUAGGUUGCAUAGUU	0
MIMAT0000065_MirBase_let-7d_microRNA	AACACGTTTGAAAT	AGAGGUAGUAGGUUGCAUAGUU	0
MIMAT0000065_MirBase_let-7d_microRNA	GAAATGAACGAAATGT	AGAGGUAGUAGGUUGCAUAGUU	0
MIMAT0000065_MirBase_let-7d_microRNA	AATGGGTGAATGATTT	AGAGGUAGUAGGUUGCAUAGUU	0
MIMAT0000066_MirBase_let-7e_microRNA	CCAAUGGAAAAACUCAA	UGAGGUAGGAGGUUGUAUAGUU	0
MIMAT0000066_MirBase_let-7e_microRNA	UUGUUAAAAUUUAUUG	UGAGGUAGGAGGUUGUAUAGUU	0
MIMAT0000066_MirBase_let-7e_microRNA	ACUCAAUUACCCCCUGCA	UGAGGUAGGAGGUUGUAUAGUU	0
MIMAT0000066_MirBase_let-7e_microRNA	CGAAUACCAUAAUGAAU	UGAGGUAGGAGGUUGUAUAGUU	0
MIMAT0000066_MirBase_let-7e_microRNA	UCAAUUUAAACACC	UGAGGUAGGAGGUUGUAUAGUU	0
MIMAT0000066_MirBase_let-7e_microRNA	AAUCAUCAUCUAAA	UGAGGUAGGAGGUUGUAUAGUU	0
MIMAT0000066_MirBase_let-7e_microRNA	CAAGCUUUGUUAAA	UGAGGUAGGAGGUUGUAUAGUU	0
MIMAT0000066_MirBase_let-7e_microRNA	CCAUACCCACAAAUUUUAC	UGAGGUAGGAGGUUGUAUAGUU	0
MIMAT0000066_MirBase_let-7e_microRNA	UAUUGAAUAUCCUAUAA	UGAGGUAGGAGGUUGUAUAGUU	0
MIMAT0000066_MirBase_let-7e_microRNA	UAAACGAACAUGAAAAUU	UGAGGUAGGAGGUUGUAUAGUU	0
MIMAT0000066_MirBase_let-7e_microRNA	CACAAGUCAAACAAAUUUACAAA	UGAGGUAGGAGGUUGUAUAGUU	0
MIMAT0000066_MirBase_let-7e_microRNA	UUCCAAAAUCAUAA	UGAGGUAGGAGGUUGUAUAGUU	0
MIMAT0000066_MirBase_let-7e_microRNA	UAAUAUUACAAACU	UGAGGUAGGAGGUUGUAUAGUU	0
MIMAT0000066_MirBase_let-7e_microRNA	UUAAAAAGUUGAAGAA	UGAGGUAGGAGGUUGUAUAGUU	0
MIMAT0000066_MirBase_let-7e_microRNA	ACAACAUGUUAAAAACUGUUUA	UGAGGUAGGAGGUUGUAUAGUU	0
MIMAT0000066_MirBase_let-7e_microRNA	AUAAACCUAUUGUU	UGAGGUAGGAGGUUGUAUAGUU	0
MIMAT0000066_MirBase_let-7e_microRNA	UAAUUCUUUCACAC	UGAGGUAGGAGGUUGUAUAGUU	0
MIMAT0000066_MirBase_let-7e_microRNA	AUCCAUCAAAACCA	UGAGGUAGGAGGUUGUAUAGUU	0
MIMAT0000066_MirBase_let-7e_microRNA	ACACCUAUCCUUCU	UGAGGUAGGAGGUUGUAUAGUU	0
MIMAT0000066_MirBase_let-7e_microRNA	ACCAAACCAACCAUAUCCAA	UGAGGUAGGAGGUUGUAUAGUU	0
MIMAT0000066_MirBase_let-7e_microRNA	UUAAAAAUUACAGAA	UGAGGUAGGAGGUUGUAUAGUU	0
MIMAT0000066_MirBase_let-7e_microRNA	UAAAAUGAAUUAUC	UGAGGUAGGAGGUUGUAUAGUU	0
MIMAT0000066_MirBase_let-7e_microRNA	AAAGAACUUCACAACUGCUC	UGAGGUAGGAGGUUGUAUAGUU	0
MIMAT0000066_MirBase_let-7e_microRNA	UUUAUUACCCUGACA	UGAGGUAGGAGGUUGUAUAGUU	0
MIMAT0000066_MirBase_let-7e_microRNA	GCUCUCACUCAACAUGG	UGAGGUAGGAGGUUGUAUAGUU	0
MIMAT0000066_MirBase_let-7e_microRNA	AAAUGAUUGCUCAA	UGAGGUAGGAGGUUGUAUAGUU	0
MIMAT0000066_MirBase_let-7e_microRNA	UUAAAAAUCUGAAUUCUUC	UGAGGUAGGAGGUUGUAUAGUU	0
MIMAT0000066_MirBase_let-7e_microRNA	AAUUUGCUGAUGAUU	UGAGGUAGGAGGUUGUAUAGUU	0
MIMAT0000066_MirBase_let-7e_microRNA	GAGAAUUUGACUAAAG	UGAGGUAGGAGGUUGUAUAGUU	0
MIMAT0000066_MirBase_let-7e_microRNA	UCUUGAAACUGCUCAA	UGAGGUAGGAGGUUGUAUAGUU	0
MIMAT0000066_MirBase_let-7e_microRNA	GAAGAGCAACCAAUG	UGAGGUAGGAGGUUGUAUAGUU	0
MIMAT0000066_MirBase_let-7e_microRNA	UCAAGAAAUUCAAC	UGAGGUAGGAGGUUGUAUAGUU	0
MIMAT0000066_MirBase_let-7e_microRNA	UGUAUUAAUGCUAAC	UGAGGUAGGAGGUUGUAUAGUU	0
MIMAT0000066_MirBase_let-7e_microRNA	UGUCACUAAGAAAUCU	UGAGGUAGGAGGUUGUAUAGUU	0
MIMAT0000066_MirBase_let-7e_microRNA	AUUUUUGUACUUGUUACU	UGAGGUAGGAGGUUGUAUAGUU	0
MIMAT0000066_MirBase_let-7e_microRNA	CACAUGCUUUUCCA	UGAGGUAGGAGGUUGUAUAGUU	0
MIMAT0000066_MirBase_let-7e_microRNA	GAAAUUAAAUUGGCAAA	UGAGGUAGGAGGUUGUAUAGUU	0
MIMAT0000066_MirBase_let-7e_microRNA	UUACCCACUUACUAAA	UGAGGUAGGAGGUUGUAUAGUU	0
MIMAT0000066_MirBase_let-7e_microRNA	CTTTAATTTAACCGTTT	UGAGGUAGGAGGUUGUAUAGUU	0
MIMAT0000066_MirBase_let-7e_microRNA	AACACGTTTGAAAT	UGAGGUAGGAGGUUGUAUAGUU	0
MIMAT0000066_MirBase_let-7e_microRNA	GAAATGAACGAAATGT	UGAGGUAGGAGGUUGUAUAGUU	0
MIMAT0000067_MirBase_let-7f_microRNA	CCAAUGGAAAAACUCAA	UGAGGUAGUAGAUUGUAUAGUU	0
MIMAT0000067_MirBase_let-7f_microRNA	ACUCAAUUACCCCCUGCA	UGAGGUAGUAGAUUGUAUAGUU	0
MIMAT0000067_MirBase_let-7f_microRNA	CGAAUACCAUAAUGAAU	UGAGGUAGUAGAUUGUAUAGUU	0
MIMAT0000067_MirBase_let-7f_microRNA	AAUCAUCAUCUAAA	UGAGGUAGUAGAUUGUAUAGUU	0
MIMAT0000067_MirBase_let-7f_microRNA	UUUAAUUUUUCACAAAUAUUAC	UGAGGUAGUAGAUUGUAUAGUU	0
MIMAT0000067_MirBase_let-7f_microRNA	CAAGCUUUGUUAAA	UGAGGUAGUAGAUUGUAUAGUU	0
MIMAT0000067_MirBase_let-7f_microRNA	UCUUUACCAACCACCACAAACCUCUAU	UGAGGUAGUAGAUUGUAUAGUU	0
MIMAT0000067_MirBase_let-7f_microRNA	CCAUACCCACAAAUUUUAC	UGAGGUAGUAGAUUGUAUAGUU	0
MIMAT0000067_MirBase_let-7f_microRNA	UAUUGAAUAUCCUAUAA	UGAGGUAGUAGAUUGUAUAGUU	0
MIMAT0000067_MirBase_let-7f_microRNA	UAAACGAACAUGAAAAUU	UGAGGUAGUAGAUUGUAUAGUU	0
MIMAT0000067_MirBase_let-7f_microRNA	UAAACAUAUAACUUCUA	UGAGGUAGUAGAUUGUAUAGUU	0
MIMAT0000067_MirBase_let-7f_microRNA	UUCCAAAAUCAUAA	UGAGGUAGUAGAUUGUAUAGUU	0
MIMAT0000067_MirBase_let-7f_microRNA	UAAUAUUACAAACU	UGAGGUAGUAGAUUGUAUAGUU	0
MIMAT0000067_MirBase_let-7f_microRNA	UUAAAAAGUUGAAGAA	UGAGGUAGUAGAUUGUAUAGUU	0
MIMAT0000067_MirBase_let-7f_microRNA	UAAUUCUUUCACAC	UGAGGUAGUAGAUUGUAUAGUU	0
MIMAT0000067_MirBase_let-7f_microRNA	AUCCAUCAAAACCA	UGAGGUAGUAGAUUGUAUAGUU	0
MIMAT0000067_MirBase_let-7f_microRNA	ACACCUAUCCUUCU	UGAGGUAGUAGAUUGUAUAGUU	0
MIMAT0000067_MirBase_let-7f_microRNA	ACCAAACCAACCAUAUCCAA	UGAGGUAGUAGAUUGUAUAGUU	0
MIMAT0000067_MirBase_let-7f_microRNA	UUAAAAAUUACAGAA	UGAGGUAGUAGAUUGUAUAGUU	0
MIMAT0000067_MirBase_let-7f_microRNA	UAAAAUGAAUUAUC	UGAGGUAGUAGAUUGUAUAGUU	0
MIMAT0000067_MirBase_let-7f_microRNA	AAAGAACUUCACAACUGCUC	UGAGGUAGUAGAUUGUAUAGUU	0
MIMAT0000067_MirBase_let-7f_microRNA	GCUCUCACUCAACAUGG	UGAGGUAGUAGAUUGUAUAGUU	0
MIMAT0000067_MirBase_let-7f_microRNA	AAAUGAUUGCUCAA	UGAGGUAGUAGAUUGUAUAGUU	0
MIMAT0000067_MirBase_let-7f_microRNA	UUAAAAAUCUGAAUUCUUC	UGAGGUAGUAGAUUGUAUAGUU	0
MIMAT0000067_MirBase_let-7f_microRNA	GAGAAUUUGACUAAAG	UGAGGUAGUAGAUUGUAUAGUU	0
MIMAT0000067_MirBase_let-7f_microRNA	UCUUGAAACUGCUCAA	UGAGGUAGUAGAUUGUAUAGUU	0
MIMAT0000067_MirBase_let-7f_microRNA	GAAGAGCAACCAAUG	UGAGGUAGUAGAUUGUAUAGUU	0
MIMAT0000067_MirBase_let-7f_microRNA	UCAAGAAAUUCAAC	UGAGGUAGUAGAUUGUAUAGUU	0
MIMAT0000067_MirBase_let-7f_microRNA	UGUAUUAAUGCUAAC	UGAGGUAGUAGAUUGUAUAGUU	0
MIMAT0000067_MirBase_let-7f_microRNA	UAACCUUAACUUGC	UGAGGUAGUAGAUUGUAUAGUU	0
MIMAT0000067_MirBase_let-7f_microRNA	UGUCACUAAGAAAUCU	UGAGGUAGUAGAUUGUAUAGUU	0
MIMAT0000067_MirBase_let-7f_microRNA	AUUGUUUUUAUGUGUGUU	UGAGGUAGUAGAUUGUAUAGUU	0
MIMAT0000067_MirBase_let-7f_microRNA	CACAUGCUUUUCCA	UGAGGUAGUAGAUUGUAUAGUU	0
MIMAT0000067_MirBase_let-7f_microRNA	GAAAUUAAAUUGGCAAA	UGAGGUAGUAGAUUGUAUAGUU	0
MIMAT0000067_MirBase_let-7f_microRNA	UUUGAUAAAAAUCUCUAUGA	UGAGGUAGUAGAUUGUAUAGUU	0
MIMAT0000067_MirBase_let-7f_microRNA	UUACCCACUUACUAAA	UGAGGUAGUAGAUUGUAUAGUU	0
MIMAT0000067_MirBase_let-7f_microRNA	AACACGTTTGAAAT	UGAGGUAGUAGAUUGUAUAGUU	0
MIMAT0000067_MirBase_let-7f_microRNA	GAAATGAACGAAATGT	UGAGGUAGUAGAUUGUAUAGUU	0
MIMAT0000068_MirBase_miR-15a_microRNA	AUACAAUGUAACAC	UAGCAGCACAUAAUGGUUUGUG	0
MIMAT0000068_MirBase_miR-15a_microRNA	CCAAUGGAAAAACUCAA	UAGCAGCACAUAAUGGUUUGUG	0
MIMAT0000068_MirBase_miR-15a_microRNA	UUGUUAAAAUUUAUUG	UAGCAGCACAUAAUGGUUUGUG	0
MIMAT0000068_MirBase_miR-15a_microRNA	ACUCAAUUACCCCCUGCA	UAGCAGCACAUAAUGGUUUGUG	0
MIMAT0000068_MirBase_miR-15a_microRNA	CGAAUACCAUAAUGAAU	UAGCAGCACAUAAUGGUUUGUG	0
MIMAT0000068_MirBase_miR-15a_microRNA	UCAAUUUAAACACC	UAGCAGCACAUAAUGGUUUGUG	0
MIMAT0000068_MirBase_miR-15a_microRNA	AAUCAUCAUCUAAA	UAGCAGCACAUAAUGGUUUGUG	0
MIMAT0000068_MirBase_miR-15a_microRNA	CAAGCUUUGUUAAA	UAGCAGCACAUAAUGGUUUGUG	0
MIMAT0000068_MirBase_miR-15a_microRNA	UAUUGAAUAUCCUAUAA	UAGCAGCACAUAAUGGUUUGUG	0
MIMAT0000068_MirBase_miR-15a_microRNA	UAAACGAACAUGAAAAUU	UAGCAGCACAUAAUGGUUUGUG	0
MIMAT0000068_MirBase_miR-15a_microRNA	UAAACAUAUAACUUCUA	UAGCAGCACAUAAUGGUUUGUG	0
MIMAT0000068_MirBase_miR-15a_microRNA	CUGUCUUUAUUUCACCUUAUAAUU	UAGCAGCACAUAAUGGUUUGUG	0
MIMAT0000068_MirBase_miR-15a_microRNA	UUAAAAAGUUGAAGAA	UAGCAGCACAUAAUGGUUUGUG	0
MIMAT0000068_MirBase_miR-15a_microRNA	UUGUACUAAUUAUAUGCCUUAUUUCUU	UAGCAGCACAUAAUGGUUUGUG	0
MIMAT0000068_MirBase_miR-15a_microRNA	UAAUUCUUUCACAC	UAGCAGCACAUAAUGGUUUGUG	0
MIMAT0000068_MirBase_miR-15a_microRNA	AUCCAUCAAAACCA	UAGCAGCACAUAAUGGUUUGUG	0
MIMAT0000068_MirBase_miR-15a_microRNA	ACACCUAUCCUUCU	UAGCAGCACAUAAUGGUUUGUG	0
MIMAT0000068_MirBase_miR-15a_microRNA	UUAAAAAUUACAGAA	UAGCAGCACAUAAUGGUUUGUG	0
MIMAT0000068_MirBase_miR-15a_microRNA	UAAAAUGAAUUAUC	UAGCAGCACAUAAUGGUUUGUG	0
MIMAT0000068_MirBase_miR-15a_microRNA	UUUACUCAACCGCUACUUUAGAC	UAGCAGCACAUAAUGGUUUGUG	0
MIMAT0000068_MirBase_miR-15a_microRNA	AAAGAACUUCACAACUGCUC	UAGCAGCACAUAAUGGUUUGUG	0
MIMAT0000068_MirBase_miR-15a_microRNA	UUUAUUACCCUGACA	UAGCAGCACAUAAUGGUUUGUG	0
MIMAT0000068_MirBase_miR-15a_microRNA	AUAAGAAACCUGCUUCAA	UAGCAGCACAUAAUGGUUUGUG	0
MIMAT0000068_MirBase_miR-15a_microRNA	GCUCUCACUCAACAUGG	UAGCAGCACAUAAUGGUUUGUG	0
MIMAT0000068_MirBase_miR-15a_microRNA	UCUUGUCUGUUAAUC	UAGCAGCACAUAAUGGUUUGUG	0
MIMAT0000068_MirBase_miR-15a_microRNA	UUUUACAAUUAAUUG	UAGCAGCACAUAAUGGUUUGUG	0
MIMAT0000068_MirBase_miR-15a_microRNA	AAAUGAUUGCUCAA	UAGCAGCACAUAAUGGUUUGUG	0
MIMAT0000068_MirBase_miR-15a_microRNA	UUAAAAAUCUGAAUUCUUC	UAGCAGCACAUAAUGGUUUGUG	0
MIMAT0000068_MirBase_miR-15a_microRNA	AAUUUGCUGAUGAUU	UAGCAGCACAUAAUGGUUUGUG	0
MIMAT0000068_MirBase_miR-15a_microRNA	GAGAAUUUGACUAAAG	UAGCAGCACAUAAUGGUUUGUG	0
MIMAT0000068_MirBase_miR-15a_microRNA	UCUUGAAACUGCUCAA	UAGCAGCACAUAAUGGUUUGUG	0
MIMAT0000068_MirBase_miR-15a_microRNA	GAAGAGCAACCAAUG	UAGCAGCACAUAAUGGUUUGUG	0
MIMAT0000068_MirBase_miR-15a_microRNA	UCAAGAAAUUCAAC	UAGCAGCACAUAAUGGUUUGUG	0
MIMAT0000068_MirBase_miR-15a_microRNA	UGUAUUAAUGCUAAC	UAGCAGCACAUAAUGGUUUGUG	0
MIMAT0000068_MirBase_miR-15a_microRNA	UAACCUUAACUUGC	UAGCAGCACAUAAUGGUUUGUG	0
MIMAT0000068_MirBase_miR-15a_microRNA	UUAGAUAUAUGAAUUCA	UAGCAGCACAUAAUGGUUUGUG	0
MIMAT0000068_MirBase_miR-15a_microRNA	UGUCACUAAGAAAUCU	UAGCAGCACAUAAUGGUUUGUG	0
MIMAT0000068_MirBase_miR-15a_microRNA	AUUUUUGUACUUGUUACU	UAGCAGCACAUAAUGGUUUGUG	0
MIMAT0000068_MirBase_miR-15a_microRNA	CACAUGCUUUUCCA	UAGCAGCACAUAAUGGUUUGUG	0
MIMAT0000068_MirBase_miR-15a_microRNA	AAUAAUUAAUCUUGUACAA	UAGCAGCACAUAAUGGUUUGUG	0
MIMAT0000068_MirBase_miR-15a_microRNA	GAAAUUAAAUUGGCAAA	UAGCAGCACAUAAUGGUUUGUG	0
MIMAT0000068_MirBase_miR-15a_microRNA	UUUGAUAAAAAUCUCUAUGA	UAGCAGCACAUAAUGGUUUGUG	0
MIMAT0000068_MirBase_miR-15a_microRNA	CUUUACUUGCUUUACA	UAGCAGCACAUAAUGGUUUGUG	0
MIMAT0000068_MirBase_miR-15a_microRNA	UUACCCACUUACUAAA	UAGCAGCACAUAAUGGUUUGUG	0
MIMAT0000068_MirBase_miR-15a_microRNA	AACACGTTTGAAAT	UAGCAGCACAUAAUGGUUUGUG	0
MIMAT0000068_MirBase_miR-15a_microRNA	GAAATGAACGAAATGT	UAGCAGCACAUAAUGGUUUGUG	0
MIMAT0000068_MirBase_miR-15a_microRNA	AATGGGTGAATGATTT	UAGCAGCACAUAAUGGUUUGUG	0
MIMAT0000069_MirBase_miR-16_microRNA	AUACAAUGUAACAC	UAGCAGCACGUAAAUAUUGGCG	0
MIMAT0000069_MirBase_miR-16_microRNA	CCAAUGGAAAAACUCAA	UAGCAGCACGUAAAUAUUGGCG	0
MIMAT0000069_MirBase_miR-16_microRNA	UUGUUAAAAUUUAUUG	UAGCAGCACGUAAAUAUUGGCG	0
MIMAT0000069_MirBase_miR-16_microRNA	ACUCAAUUACCCCCUGCA	UAGCAGCACGUAAAUAUUGGCG	0
MIMAT0000069_MirBase_miR-16_microRNA	CGAAUACCAUAAUGAAU	UAGCAGCACGUAAAUAUUGGCG	0
MIMAT0000069_MirBase_miR-16_microRNA	UCAAUUUAAACACC	UAGCAGCACGUAAAUAUUGGCG	0
MIMAT0000069_MirBase_miR-16_microRNA	AAUCAUCAUCUAAA	UAGCAGCACGUAAAUAUUGGCG	0
MIMAT0000069_MirBase_miR-16_microRNA	UUUAAUUUUUCACAAAUAUUAC	UAGCAGCACGUAAAUAUUGGCG	0
MIMAT0000069_MirBase_miR-16_microRNA	CAAGCUUUGUUAAA	UAGCAGCACGUAAAUAUUGGCG	0
MIMAT0000069_MirBase_miR-16_microRNA	UCUUUACCAACCACCACAAACCUCUAU	UAGCAGCACGUAAAUAUUGGCG	0
MIMAT0000069_MirBase_miR-16_microRNA	CCAUACCCACAAAUUUUAC	UAGCAGCACGUAAAUAUUGGCG	0
MIMAT0000069_MirBase_miR-16_microRNA	UAUUGAAUAUCCUAUAA	UAGCAGCACGUAAAUAUUGGCG	0
MIMAT0000069_MirBase_miR-16_microRNA	UAAACGAACAUGAAAAUU	UAGCAGCACGUAAAUAUUGGCG	0
MIMAT0000069_MirBase_miR-16_microRNA	UAAACAUAUAACUUCUA	UAGCAGCACGUAAAUAUUGGCG	0
MIMAT0000069_MirBase_miR-16_microRNA	CACAAGUCAAACAAAUUUACAAA	UAGCAGCACGUAAAUAUUGGCG	0
MIMAT0000069_MirBase_miR-16_microRNA	CUGUCUUUAUUUCACCUUAUAAUU	UAGCAGCACGUAAAUAUUGGCG	0
MIMAT0000069_MirBase_miR-16_microRNA	UUCCAAAAUCAUAA	UAGCAGCACGUAAAUAUUGGCG	0
MIMAT0000069_MirBase_miR-16_microRNA	UUACAAACAAUUUGAUACUU	UAGCAGCACGUAAAUAUUGGCG	0
MIMAT0000069_MirBase_miR-16_microRNA	ACAAUUGGAACUGUAACUUUG	UAGCAGCACGUAAAUAUUGGCG	0
MIMAT0000069_MirBase_miR-16_microRNA	UUAAAAAGUUGAAGAA	UAGCAGCACGUAAAUAUUGGCG	0
MIMAT0000069_MirBase_miR-16_microRNA	UUGUACUAAUUAUAUGCCUUAUUUCUU	UAGCAGCACGUAAAUAUUGGCG	0
MIMAT0000069_MirBase_miR-16_microRNA	ACAACAUGUUAAAAACUGUUUA	UAGCAGCACGUAAAUAUUGGCG	0
MIMAT0000069_MirBase_miR-16_microRNA	AUAAACCUAUUGUU	UAGCAGCACGUAAAUAUUGGCG	0
MIMAT0000069_MirBase_miR-16_microRNA	UAAUUCUUUCACAC	UAGCAGCACGUAAAUAUUGGCG	0
MIMAT0000069_MirBase_miR-16_microRNA	AUCCAUCAAAACCA	UAGCAGCACGUAAAUAUUGGCG	0
MIMAT0000069_MirBase_miR-16_microRNA	ACACCUAUCCUUCU	UAGCAGCACGUAAAUAUUGGCG	0
MIMAT0000069_MirBase_miR-16_microRNA	ACCAAACCAACCAUAUCCAA	UAGCAGCACGUAAAUAUUGGCG	0
MIMAT0000069_MirBase_miR-16_microRNA	UUAAAAAUUACAGAA	UAGCAGCACGUAAAUAUUGGCG	0
MIMAT0000069_MirBase_miR-16_microRNA	UAAAAUGAAUUAUC	UAGCAGCACGUAAAUAUUGGCG	0
MIMAT0000069_MirBase_miR-16_microRNA	UUUACUCAACCGCUACUUUAGAC	UAGCAGCACGUAAAUAUUGGCG	0
MIMAT0000069_MirBase_miR-16_microRNA	AAAGAACUUCACAACUGCUC	UAGCAGCACGUAAAUAUUGGCG	0
MIMAT0000069_MirBase_miR-16_microRNA	UUUAUUACCCUGACA	UAGCAGCACGUAAAUAUUGGCG	0
MIMAT0000069_MirBase_miR-16_microRNA	AUAAGAAACCUGCUUCAA	UAGCAGCACGUAAAUAUUGGCG	0
MIMAT0000069_MirBase_miR-16_microRNA	GCUCUCACUCAACAUGG	UAGCAGCACGUAAAUAUUGGCG	0
MIMAT0000069_MirBase_miR-16_microRNA	UUUUACAAUUAAUUG	UAGCAGCACGUAAAUAUUGGCG	0
MIMAT0000069_MirBase_miR-16_microRNA	AAAUGAUUGCUCAA	UAGCAGCACGUAAAUAUUGGCG	0
MIMAT0000069_MirBase_miR-16_microRNA	UUAAAAAUCUGAAUUCUUC	UAGCAGCACGUAAAUAUUGGCG	0
MIMAT0000069_MirBase_miR-16_microRNA	GAGAAUUUGACUAAAG	UAGCAGCACGUAAAUAUUGGCG	0
MIMAT0000069_MirBase_miR-16_microRNA	UCUUGAAACUGCUCAA	UAGCAGCACGUAAAUAUUGGCG	0
MIMAT0000069_MirBase_miR-16_microRNA	GAAGAGCAACCAAUG	UAGCAGCACGUAAAUAUUGGCG	0
MIMAT0000069_MirBase_miR-16_microRNA	UCAAGAAAUUCAAC	UAGCAGCACGUAAAUAUUGGCG	0
MIMAT0000069_MirBase_miR-16_microRNA	UGUAUUAAUGCUAAC	UAGCAGCACGUAAAUAUUGGCG	0
MIMAT0000069_MirBase_miR-16_microRNA	UAACCUUAACUUGC	UAGCAGCACGUAAAUAUUGGCG	0
MIMAT0000069_MirBase_miR-16_microRNA	UUAGAUAUAUGAAUUCA	UAGCAGCACGUAAAUAUUGGCG	0
MIMAT0000069_MirBase_miR-16_microRNA	UGUCACUAAGAAAUCU	UAGCAGCACGUAAAUAUUGGCG	0
MIMAT0000069_MirBase_miR-16_microRNA	AUUUUUGUACUUGUUACU	UAGCAGCACGUAAAUAUUGGCG	0
MIMAT0000069_MirBase_miR-16_microRNA	CACAUGCUUUUCCA	UAGCAGCACGUAAAUAUUGGCG	0
MIMAT0000069_MirBase_miR-16_microRNA	AAUAAUUAAUCUUGUACAA	UAGCAGCACGUAAAUAUUGGCG	0
MIMAT0000069_MirBase_miR-16_microRNA	GAAAUUAAAUUGGCAAA	UAGCAGCACGUAAAUAUUGGCG	0
MIMAT0000069_MirBase_miR-16_microRNA	UUGUGCAAACUUUA	UAGCAGCACGUAAAUAUUGGCG	0
MIMAT0000069_MirBase_miR-16_microRNA	UUUGAUAAAAAUCUCUAUGA	UAGCAGCACGUAAAUAUUGGCG	0
MIMAT0000069_MirBase_miR-16_microRNA	CUUUACUUGCUUUACA	UAGCAGCACGUAAAUAUUGGCG	0
MIMAT0000069_MirBase_miR-16_microRNA	UUACCCACUUACUAAA	UAGCAGCACGUAAAUAUUGGCG	0
MIMAT0000069_MirBase_miR-16_microRNA	CTTTAATTTAACCGTTT	UAGCAGCACGUAAAUAUUGGCG	0
MIMAT0000069_MirBase_miR-16_microRNA	AACACGTTTGAAAT	UAGCAGCACGUAAAUAUUGGCG	0
MIMAT0000069_MirBase_miR-16_microRNA	AAACTATTTTTAGAGATACT	UAGCAGCACGUAAAUAUUGGCG	0
MIMAT0000069_MirBase_miR-16_microRNA	GAAATGAACGAAATGT	UAGCAGCACGUAAAUAUUGGCG	0
MIMAT0000069_MirBase_miR-16_microRNA	AATGGGTGAATGATTT	UAGCAGCACGUAAAUAUUGGCG	0
MIMAT0000070_MirBase_miR-17_microRNA	AUACAAUGUAACAC	CAAAGUGCUUACAGUGCAGGUAG	0
MIMAT0000070_MirBase_miR-17_microRNA	CCAAUGGAAAAACUCAA	CAAAGUGCUUACAGUGCAGGUAG	0
MIMAT0000070_MirBase_miR-17_microRNA	UUGUUAAAAUUUAUUG	CAAAGUGCUUACAGUGCAGGUAG	0
MIMAT0000070_MirBase_miR-17_microRNA	ACUCAAUUACCCCCUGCA	CAAAGUGCUUACAGUGCAGGUAG	0
MIMAT0000070_MirBase_miR-17_microRNA	CGAAUACCAUAAUGAAU	CAAAGUGCUUACAGUGCAGGUAG	0
MIMAT0000070_MirBase_miR-17_microRNA	UCAAUUUAAACACC	CAAAGUGCUUACAGUGCAGGUAG	0
MIMAT0000070_MirBase_miR-17_microRNA	AAUCAUCAUCUAAA	CAAAGUGCUUACAGUGCAGGUAG	0
MIMAT0000070_MirBase_miR-17_microRNA	UUUAAUUUUUCACAAAUAUUAC	CAAAGUGCUUACAGUGCAGGUAG	0
MIMAT0000070_MirBase_miR-17_microRNA	CAAGCUUUGUUAAA	CAAAGUGCUUACAGUGCAGGUAG	0
MIMAT0000070_MirBase_miR-17_microRNA	UCUUUACCAACCACCACAAACCUCUAU	CAAAGUGCUUACAGUGCAGGUAG	0
MIMAT0000070_MirBase_miR-17_microRNA	CCAUACCCACAAAUUUUAC	CAAAGUGCUUACAGUGCAGGUAG	0
MIMAT0000070_MirBase_miR-17_microRNA	UAUUGAAUAUCCUAUAA	CAAAGUGCUUACAGUGCAGGUAG	0
MIMAT0000070_MirBase_miR-17_microRNA	UAAACGAACAUGAAAAUU	CAAAGUGCUUACAGUGCAGGUAG	0
MIMAT0000070_MirBase_miR-17_microRNA	UAAACAUAUAACUUCUA	CAAAGUGCUUACAGUGCAGGUAG	0
MIMAT0000070_MirBase_miR-17_microRNA	CACAAGUCAAACAAAUUUACAAA	CAAAGUGCUUACAGUGCAGGUAG	0
MIMAT0000070_MirBase_miR-17_microRNA	CUGUCUUUAUUUCACCUUAUAAUU	CAAAGUGCUUACAGUGCAGGUAG	0
MIMAT0000070_MirBase_miR-17_microRNA	UUCCAAAAUCAUAA	CAAAGUGCUUACAGUGCAGGUAG	0
MIMAT0000070_MirBase_miR-17_microRNA	UUACAAACAAUUUGAUACUU	CAAAGUGCUUACAGUGCAGGUAG	0
MIMAT0000070_MirBase_miR-17_microRNA	UAAUAUUACAAACU	CAAAGUGCUUACAGUGCAGGUAG	0
MIMAT0000070_MirBase_miR-17_microRNA	UUAAAAAGUUGAAGAA	CAAAGUGCUUACAGUGCAGGUAG	0
MIMAT0000070_MirBase_miR-17_microRNA	ACAACAUGUUAAAAACUGUUUA	CAAAGUGCUUACAGUGCAGGUAG	0
MIMAT0000070_MirBase_miR-17_microRNA	AUAAACCUAUUGUU	CAAAGUGCUUACAGUGCAGGUAG	0
MIMAT0000070_MirBase_miR-17_microRNA	UAAUUCUUUCACAC	CAAAGUGCUUACAGUGCAGGUAG	0
MIMAT0000070_MirBase_miR-17_microRNA	AUCCAUCAAAACCA	CAAAGUGCUUACAGUGCAGGUAG	0
MIMAT0000070_MirBase_miR-17_microRNA	ACACCUAUCCUUCU	CAAAGUGCUUACAGUGCAGGUAG	0
MIMAT0000070_MirBase_miR-17_microRNA	ACCAAACCAACCAUAUCCAA	CAAAGUGCUUACAGUGCAGGUAG	0
MIMAT0000070_MirBase_miR-17_microRNA	UUAAAAAUUACAGAA	CAAAGUGCUUACAGUGCAGGUAG	0
MIMAT0000070_MirBase_miR-17_microRNA	UAAAAUGAAUUAUC	CAAAGUGCUUACAGUGCAGGUAG	0
MIMAT0000070_MirBase_miR-17_microRNA	UUUACUCAACCGCUACUUUAGAC	CAAAGUGCUUACAGUGCAGGUAG	0
MIMAT0000070_MirBase_miR-17_microRNA	AAAGAACUUCACAACUGCUC	CAAAGUGCUUACAGUGCAGGUAG	0
MIMAT0000070_MirBase_miR-17_microRNA	UUUAUUACCCUGACA	CAAAGUGCUUACAGUGCAGGUAG	0
MIMAT0000070_MirBase_miR-17_microRNA	AUAAGAAACCUGCUUCAA	CAAAGUGCUUACAGUGCAGGUAG	0
MIMAT0000070_MirBase_miR-17_microRNA	GCUCUCACUCAACAUGG	CAAAGUGCUUACAGUGCAGGUAG	0
MIMAT0000070_MirBase_miR-17_microRNA	UUUUACAAUUAAUUG	CAAAGUGCUUACAGUGCAGGUAG	0
MIMAT0000070_MirBase_miR-17_microRNA	AAAUGAUUGCUCAA	CAAAGUGCUUACAGUGCAGGUAG	0
MIMAT0000070_MirBase_miR-17_microRNA	UUAAAAAUCUGAAUUCUUC	CAAAGUGCUUACAGUGCAGGUAG	0
MIMAT0000070_MirBase_miR-17_microRNA	AAUUUGCUGAUGAUU	CAAAGUGCUUACAGUGCAGGUAG	0
MIMAT0000070_MirBase_miR-17_microRNA	GAGAAUUUGACUAAAG	CAAAGUGCUUACAGUGCAGGUAG	0
MIMAT0000070_MirBase_miR-17_microRNA	UCUUGAAACUGCUCAA	CAAAGUGCUUACAGUGCAGGUAG	0
MIMAT0000070_MirBase_miR-17_microRNA	GAAGAGCAACCAAUG	CAAAGUGCUUACAGUGCAGGUAG	0
MIMAT0000070_MirBase_miR-17_microRNA	UCAAGAAAUUCAAC	CAAAGUGCUUACAGUGCAGGUAG	0
MIMAT0000070_MirBase_miR-17_microRNA	UGUAUUAAUGCUAAC	CAAAGUGCUUACAGUGCAGGUAG	0
MIMAT0000070_MirBase_miR-17_microRNA	UAACCUUAACUUGC	CAAAGUGCUUACAGUGCAGGUAG	0
MIMAT0000070_MirBase_miR-17_microRNA	UUAGAUAUAUGAAUUCA	CAAAGUGCUUACAGUGCAGGUAG	0
MIMAT0000070_MirBase_miR-17_microRNA	UGUCACUAAGAAAUCU	CAAAGUGCUUACAGUGCAGGUAG	0
MIMAT0000070_MirBase_miR-17_microRNA	AUUGUUUUUAUGUGUGUU	CAAAGUGCUUACAGUGCAGGUAG	0
MIMAT0000070_MirBase_miR-17_microRNA	CACAUGCUUUUCCA	CAAAGUGCUUACAGUGCAGGUAG	0
MIMAT0000070_MirBase_miR-17_microRNA	GAAAUUAAAUUGGCAAA	CAAAGUGCUUACAGUGCAGGUAG	0
MIMAT0000070_MirBase_miR-17_microRNA	UUGUGCAAACUUUA	CAAAGUGCUUACAGUGCAGGUAG	0
MIMAT0000070_MirBase_miR-17_microRNA	UUUGAUAAAAAUCUCUAUGA	CAAAGUGCUUACAGUGCAGGUAG	0
MIMAT0000070_MirBase_miR-17_microRNA	UUACCCACUUACUAAA	CAAAGUGCUUACAGUGCAGGUAG	0
MIMAT0000070_MirBase_miR-17_microRNA	CTTTAATTTAACCGTTT	CAAAGUGCUUACAGUGCAGGUAG	0
MIMAT0000070_MirBase_miR-17_microRNA	AACACGTTTGAAAT	CAAAGUGCUUACAGUGCAGGUAG	0
MIMAT0000070_MirBase_miR-17_microRNA	AAACTATTTTTAGAGATACT	CAAAGUGCUUACAGUGCAGGUAG	0
MIMAT0000070_MirBase_miR-17_microRNA	GAAATGAACGAAATGT	CAAAGUGCUUACAGUGCAGGUAG	0
MIMAT0000070_MirBase_miR-17_microRNA	AATGGGTGAATGATTT	CAAAGUGCUUACAGUGCAGGUAG	0
MIMAT0000071_MirBase_miR-17*_microRNA	AUACAAUGUAACAC	ACUGCAGUGAAGGCACUUGUAG	0
MIMAT0000071_MirBase_miR-17*_microRNA	CCAAUGGAAAAACUCAA	ACUGCAGUGAAGGCACUUGUAG	0
MIMAT0000071_MirBase_miR-17*_microRNA	UUGUUAAAAUUUAUUG	ACUGCAGUGAAGGCACUUGUAG	0
MIMAT0000071_MirBase_miR-17*_microRNA	ACUCAAUUACCCCCUGCA	ACUGCAGUGAAGGCACUUGUAG	0
MIMAT0000071_MirBase_miR-17*_microRNA	CGAAUACCAUAAUGAAU	ACUGCAGUGAAGGCACUUGUAG	0
MIMAT0000071_MirBase_miR-17*_microRNA	UCAAUUUAAACACC	ACUGCAGUGAAGGCACUUGUAG	0
MIMAT0000071_MirBase_miR-17*_microRNA	AAUCAUCAUCUAAA	ACUGCAGUGAAGGCACUUGUAG	0
MIMAT0000071_MirBase_miR-17*_microRNA	CAAGCUUUGUUAAA	ACUGCAGUGAAGGCACUUGUAG	0
MIMAT0000071_MirBase_miR-17*_microRNA	CCAUACCCACAAAUUUUAC	ACUGCAGUGAAGGCACUUGUAG	0
MIMAT0000071_MirBase_miR-17*_microRNA	UAUUGAAUAUCCUAUAA	ACUGCAGUGAAGGCACUUGUAG	0
MIMAT0000071_MirBase_miR-17*_microRNA	UAAACGAACAUGAAAAUU	ACUGCAGUGAAGGCACUUGUAG	0
MIMAT0000071_MirBase_miR-17*_microRNA	UAAACAUAUAACUUCUA	ACUGCAGUGAAGGCACUUGUAG	0
MIMAT0000071_MirBase_miR-17*_microRNA	CACAAGUCAAACAAAUUUACAAA	ACUGCAGUGAAGGCACUUGUAG	0
MIMAT0000071_MirBase_miR-17*_microRNA	UUCCAAAAUCAUAA	ACUGCAGUGAAGGCACUUGUAG	0
MIMAT0000071_MirBase_miR-17*_microRNA	UUACAAACAAUUUGAUACUU	ACUGCAGUGAAGGCACUUGUAG	0
MIMAT0000071_MirBase_miR-17*_microRNA	UAAUAUUACAAACU	ACUGCAGUGAAGGCACUUGUAG	0
MIMAT0000071_MirBase_miR-17*_microRNA	ACAAUUGGAACUGUAACUUUG	ACUGCAGUGAAGGCACUUGUAG	0
MIMAT0000071_MirBase_miR-17*_microRNA	UUAAAAAGUUGAAGAA	ACUGCAGUGAAGGCACUUGUAG	0
MIMAT0000071_MirBase_miR-17*_microRNA	UUGUACUAAUUAUAUGCCUUAUUUCUU	ACUGCAGUGAAGGCACUUGUAG	0
MIMAT0000071_MirBase_miR-17*_microRNA	ACAACAUGUUAAAAACUGUUUA	ACUGCAGUGAAGGCACUUGUAG	0
MIMAT0000071_MirBase_miR-17*_microRNA	AUAAACCUAUUGUU	ACUGCAGUGAAGGCACUUGUAG	0
MIMAT0000071_MirBase_miR-17*_microRNA	UAUUCUGUUAUUUACUUGUAC	ACUGCAGUGAAGGCACUUGUAG	0
MIMAT0000071_MirBase_miR-17*_microRNA	AUCCAUCAAAACCA	ACUGCAGUGAAGGCACUUGUAG	0
MIMAT0000071_MirBase_miR-17*_microRNA	ACACCUAUCCUUCU	ACUGCAGUGAAGGCACUUGUAG	0
MIMAT0000071_MirBase_miR-17*_microRNA	ACCAAACCAACCAUAUCCAA	ACUGCAGUGAAGGCACUUGUAG	0
MIMAT0000071_MirBase_miR-17*_microRNA	UUAAAAAUUACAGAA	ACUGCAGUGAAGGCACUUGUAG	0
MIMAT0000071_MirBase_miR-17*_microRNA	UAAAAUGAAUUAUC	ACUGCAGUGAAGGCACUUGUAG	0
MIMAT0000071_MirBase_miR-17*_microRNA	UUUACUCAACCGCUACUUUAGAC	ACUGCAGUGAAGGCACUUGUAG	0
MIMAT0000071_MirBase_miR-17*_microRNA	AAAGAACUUCACAACUGCUC	ACUGCAGUGAAGGCACUUGUAG	0
MIMAT0000071_MirBase_miR-17*_microRNA	UUUAUUACCCUGACA	ACUGCAGUGAAGGCACUUGUAG	0
MIMAT0000071_MirBase_miR-17*_microRNA	AUAAGAAACCUGCUUCAA	ACUGCAGUGAAGGCACUUGUAG	0
MIMAT0000071_MirBase_miR-17*_microRNA	GCUCUCACUCAACAUGG	ACUGCAGUGAAGGCACUUGUAG	0
MIMAT0000071_MirBase_miR-17*_microRNA	UCUUGUCUGUUAAUC	ACUGCAGUGAAGGCACUUGUAG	0
MIMAT0000071_MirBase_miR-17*_microRNA	UUUUACAAUUAAUUG	ACUGCAGUGAAGGCACUUGUAG	0
MIMAT0000071_MirBase_miR-17*_microRNA	AAAUGAUUGCUCAA	ACUGCAGUGAAGGCACUUGUAG	0
MIMAT0000071_MirBase_miR-17*_microRNA	UUAAAAAUCUGAAUUCUUC	ACUGCAGUGAAGGCACUUGUAG	0
MIMAT0000071_MirBase_miR-17*_microRNA	AAUUUGCUGAUGAUU	ACUGCAGUGAAGGCACUUGUAG	0
MIMAT0000071_MirBase_miR-17*_microRNA	GAGAAUUUGACUAAAG	ACUGCAGUGAAGGCACUUGUAG	0
MIMAT0000071_MirBase_miR-17*_microRNA	UCUUGAAACUGCUCAA	ACUGCAGUGAAGGCACUUGUAG	0
MIMAT0000071_MirBase_miR-17*_microRNA	GAAGAGCAACCAAUG	ACUGCAGUGAAGGCACUUGUAG	0
MIMAT0000071_MirBase_miR-17*_microRNA	UCAAGAAAUUCAAC	ACUGCAGUGAAGGCACUUGUAG	0
MIMAT0000071_MirBase_miR-17*_microRNA	UGUAUUAAUGCUAAC	ACUGCAGUGAAGGCACUUGUAG	0
MIMAT0000071_MirBase_miR-17*_microRNA	UAACCUUAACUUGC	ACUGCAGUGAAGGCACUUGUAG	0
MIMAT0000071_MirBase_miR-17*_microRNA	UUAGAUAUAUGAAUUCA	ACUGCAGUGAAGGCACUUGUAG	0
MIMAT0000071_MirBase_miR-17*_microRNA	UGUCACUAAGAAAUCU	ACUGCAGUGAAGGCACUUGUAG	0
MIMAT0000071_MirBase_miR-17*_microRNA	AUUUUUGUACUUGUUACU	ACUGCAGUGAAGGCACUUGUAG	0
MIMAT0000071_MirBase_miR-17*_microRNA	AAUAAUUAAUCUUGUACAA	ACUGCAGUGAAGGCACUUGUAG	0
MIMAT0000071_MirBase_miR-17*_microRNA	GAAAUUAAAUUGGCAAA	ACUGCAGUGAAGGCACUUGUAG	0
MIMAT0000071_MirBase_miR-17*_microRNA	UUGUGCAAACUUUA	ACUGCAGUGAAGGCACUUGUAG	0
MIMAT0000071_MirBase_miR-17*_microRNA	UUUGAUAAAAAUCUCUAUGA	ACUGCAGUGAAGGCACUUGUAG	0
MIMAT0000071_MirBase_miR-17*_microRNA	UUACCCACUUACUAAA	ACUGCAGUGAAGGCACUUGUAG	0
MIMAT0000071_MirBase_miR-17*_microRNA	CTTTAATTTAACCGTTT	ACUGCAGUGAAGGCACUUGUAG	0
MIMAT0000071_MirBase_miR-17*_microRNA	AACACGTTTGAAAT	ACUGCAGUGAAGGCACUUGUAG	0
MIMAT0000071_MirBase_miR-17*_microRNA	AAACTATTTTTAGAGATACT	ACUGCAGUGAAGGCACUUGUAG	0
MIMAT0000071_MirBase_miR-17*_microRNA	GAAATGAACGAAATGT	ACUGCAGUGAAGGCACUUGUAG	0
MIMAT0000071_MirBase_miR-17*_microRNA	AATGGGTGAATGATTT	ACUGCAGUGAAGGCACUUGUAG	0
MIMAT0000072_MirBase_miR-18a_microRNA	AUACAAUGUAACAC	UAAGGUGCAUCUAGUGCAGAUAG	0
MIMAT0000072_MirBase_miR-18a_microRNA	CCAAUGGAAAAACUCAA	UAAGGUGCAUCUAGUGCAGAUAG	0
MIMAT0000072_MirBase_miR-18a_microRNA	UUGUUAAAAUUUAUUG	UAAGGUGCAUCUAGUGCAGAUAG	0
MIMAT0000072_MirBase_miR-18a_microRNA	ACUCAAUUACCCCCUGCA	UAAGGUGCAUCUAGUGCAGAUAG	0
MIMAT0000072_MirBase_miR-18a_microRNA	CGAAUACCAUAAUGAAU	UAAGGUGCAUCUAGUGCAGAUAG	0
MIMAT0000072_MirBase_miR-18a_microRNA	UCAAUUUAAACACC	UAAGGUGCAUCUAGUGCAGAUAG	0
MIMAT0000072_MirBase_miR-18a_microRNA	AAUCAUCAUCUAAA	UAAGGUGCAUCUAGUGCAGAUAG	0
MIMAT0000072_MirBase_miR-18a_microRNA	UUUAAUUUUUCACAAAUAUUAC	UAAGGUGCAUCUAGUGCAGAUAG	0
MIMAT0000072_MirBase_miR-18a_microRNA	CAAGCUUUGUUAAA	UAAGGUGCAUCUAGUGCAGAUAG	0
MIMAT0000072_MirBase_miR-18a_microRNA	UCUUUACCAACCACCACAAACCUCUAU	UAAGGUGCAUCUAGUGCAGAUAG	0
MIMAT0000072_MirBase_miR-18a_microRNA	CCAUACCCACAAAUUUUAC	UAAGGUGCAUCUAGUGCAGAUAG	0
MIMAT0000072_MirBase_miR-18a_microRNA	UAUUGAAUAUCCUAUAA	UAAGGUGCAUCUAGUGCAGAUAG	0
MIMAT0000072_MirBase_miR-18a_microRNA	UAAACGAACAUGAAAAUU	UAAGGUGCAUCUAGUGCAGAUAG	0
MIMAT0000072_MirBase_miR-18a_microRNA	UAAACAUAUAACUUCUA	UAAGGUGCAUCUAGUGCAGAUAG	0
MIMAT0000072_MirBase_miR-18a_microRNA	CACAAGUCAAACAAAUUUACAAA	UAAGGUGCAUCUAGUGCAGAUAG	0
MIMAT0000072_MirBase_miR-18a_microRNA	UUCCAAAAUCAUAA	UAAGGUGCAUCUAGUGCAGAUAG	0
MIMAT0000072_MirBase_miR-18a_microRNA	UUACAAACAAUUUGAUACUU	UAAGGUGCAUCUAGUGCAGAUAG	0
MIMAT0000072_MirBase_miR-18a_microRNA	UAAUAUUACAAACU	UAAGGUGCAUCUAGUGCAGAUAG	0
MIMAT0000072_MirBase_miR-18a_microRNA	ACAAUUGGAACUGUAACUUUG	UAAGGUGCAUCUAGUGCAGAUAG	0
MIMAT0000072_MirBase_miR-18a_microRNA	UUAAAAAGUUGAAGAA	UAAGGUGCAUCUAGUGCAGAUAG	0
MIMAT0000072_MirBase_miR-18a_microRNA	ACAACAUGUUAAAAACUGUUUA	UAAGGUGCAUCUAGUGCAGAUAG	0
MIMAT0000072_MirBase_miR-18a_microRNA	AUAAACCUAUUGUU	UAAGGUGCAUCUAGUGCAGAUAG	0
MIMAT0000072_MirBase_miR-18a_microRNA	UAUUCUGUUAUUUACUUGUAC	UAAGGUGCAUCUAGUGCAGAUAG	0
MIMAT0000072_MirBase_miR-18a_microRNA	UAAUUCUUUCACAC	UAAGGUGCAUCUAGUGCAGAUAG	0
MIMAT0000072_MirBase_miR-18a_microRNA	AUCCAUCAAAACCA	UAAGGUGCAUCUAGUGCAGAUAG	0
MIMAT0000072_MirBase_miR-18a_microRNA	ACACCUAUCCUUCU	UAAGGUGCAUCUAGUGCAGAUAG	0
MIMAT0000072_MirBase_miR-18a_microRNA	ACCAAACCAACCAUAUCCAA	UAAGGUGCAUCUAGUGCAGAUAG	0
MIMAT0000072_MirBase_miR-18a_microRNA	UUAAAAAUUACAGAA	UAAGGUGCAUCUAGUGCAGAUAG	0
MIMAT0000072_MirBase_miR-18a_microRNA	UAAAAUGAAUUAUC	UAAGGUGCAUCUAGUGCAGAUAG	0
MIMAT0000072_MirBase_miR-18a_microRNA	AAAGAACUUCACAACUGCUC	UAAGGUGCAUCUAGUGCAGAUAG	0
MIMAT0000072_MirBase_miR-18a_microRNA	UUUAUUACCCUGACA	UAAGGUGCAUCUAGUGCAGAUAG	0
MIMAT0000072_MirBase_miR-18a_microRNA	AUAAGAAACCUGCUUCAA	UAAGGUGCAUCUAGUGCAGAUAG	0
MIMAT0000072_MirBase_miR-18a_microRNA	GCUCUCACUCAACAUGG	UAAGGUGCAUCUAGUGCAGAUAG	0
MIMAT0000072_MirBase_miR-18a_microRNA	UUUUACAAUUAAUUG	UAAGGUGCAUCUAGUGCAGAUAG	0
MIMAT0000072_MirBase_miR-18a_microRNA	AAAUGAUUGCUCAA	UAAGGUGCAUCUAGUGCAGAUAG	0
MIMAT0000072_MirBase_miR-18a_microRNA	UUAAAAAUCUGAAUUCUUC	UAAGGUGCAUCUAGUGCAGAUAG	0
MIMAT0000072_MirBase_miR-18a_microRNA	AAUUUGCUGAUGAUU	UAAGGUGCAUCUAGUGCAGAUAG	0
MIMAT0000072_MirBase_miR-18a_microRNA	GAGAAUUUGACUAAAG	UAAGGUGCAUCUAGUGCAGAUAG	0
MIMAT0000072_MirBase_miR-18a_microRNA	UCUUGAAACUGCUCAA	UAAGGUGCAUCUAGUGCAGAUAG	0
MIMAT0000072_MirBase_miR-18a_microRNA	GAAGAGCAACCAAUG	UAAGGUGCAUCUAGUGCAGAUAG	0
MIMAT0000072_MirBase_miR-18a_microRNA	UCAAGAAAUUCAAC	UAAGGUGCAUCUAGUGCAGAUAG	0
MIMAT0000072_MirBase_miR-18a_microRNA	UAACCUUAACUUGC	UAAGGUGCAUCUAGUGCAGAUAG	0
MIMAT0000072_MirBase_miR-18a_microRNA	UUAGAUAUAUGAAUUCA	UAAGGUGCAUCUAGUGCAGAUAG	0
MIMAT0000072_MirBase_miR-18a_microRNA	UGUCACUAAGAAAUCU	UAAGGUGCAUCUAGUGCAGAUAG	0
MIMAT0000072_MirBase_miR-18a_microRNA	AUUGUUUUUAUGUGUGUU	UAAGGUGCAUCUAGUGCAGAUAG	0
MIMAT0000072_MirBase_miR-18a_microRNA	CACAUGCUUUUCCA	UAAGGUGCAUCUAGUGCAGAUAG	0
MIMAT0000072_MirBase_miR-18a_microRNA	AAUAAUUAAUCUUGUACAA	UAAGGUGCAUCUAGUGCAGAUAG	0
MIMAT0000072_MirBase_miR-18a_microRNA	GAAAUUAAAUUGGCAAA	UAAGGUGCAUCUAGUGCAGAUAG	0
MIMAT0000072_MirBase_miR-18a_microRNA	UUGUGCAAACUUUA	UAAGGUGCAUCUAGUGCAGAUAG	0
MIMAT0000072_MirBase_miR-18a_microRNA	UUUGAUAAAAAUCUCUAUGA	UAAGGUGCAUCUAGUGCAGAUAG	0
MIMAT0000072_MirBase_miR-18a_microRNA	UUACCCACUUACUAAA	UAAGGUGCAUCUAGUGCAGAUAG	0
MIMAT0000072_MirBase_miR-18a_microRNA	CTTTAATTTAACCGTTT	UAAGGUGCAUCUAGUGCAGAUAG	0
MIMAT0000072_MirBase_miR-18a_microRNA	AACACGTTTGAAAT	UAAGGUGCAUCUAGUGCAGAUAG	0
MIMAT0000072_MirBase_miR-18a_microRNA	AAACTATTTTTAGAGATACT	UAAGGUGCAUCUAGUGCAGAUAG	0
MIMAT0000072_MirBase_miR-18a_microRNA	GAAATGAACGAAATGT	UAAGGUGCAUCUAGUGCAGAUAG	0
MIMAT0000072_MirBase_miR-18a_microRNA	AATGGGTGAATGATTT	UAAGGUGCAUCUAGUGCAGAUAG	0
MIMAT0000073_MirBase_miR-19a_microRNA	AUACAAUGUAACAC	UGUGCAAAUCUAUGCAAAACUGA	0
MIMAT0000073_MirBase_miR-19a_microRNA	CCAAUGGAAAAACUCAA	UGUGCAAAUCUAUGCAAAACUGA	0
MIMAT0000073_MirBase_miR-19a_microRNA	UUGUUAAAAUUUAUUG	UGUGCAAAUCUAUGCAAAACUGA	0
MIMAT0000073_MirBase_miR-19a_microRNA	ACUCAAUUACCCCCUGCA	UGUGCAAAUCUAUGCAAAACUGA	0
MIMAT0000073_MirBase_miR-19a_microRNA	CGAAUACCAUAAUGAAU	UGUGCAAAUCUAUGCAAAACUGA	0
MIMAT0000073_MirBase_miR-19a_microRNA	UCAAUUUAAACACC	UGUGCAAAUCUAUGCAAAACUGA	0
MIMAT0000073_MirBase_miR-19a_microRNA	AAUCAUCAUCUAAA	UGUGCAAAUCUAUGCAAAACUGA	0
MIMAT0000073_MirBase_miR-19a_microRNA	UUUAAUUUUUCACAAAUAUUAC	UGUGCAAAUCUAUGCAAAACUGA	0
MIMAT0000073_MirBase_miR-19a_microRNA	CAAGCUUUGUUAAA	UGUGCAAAUCUAUGCAAAACUGA	0
MIMAT0000073_MirBase_miR-19a_microRNA	UCUUUACCAACCACCACAAACCUCUAU	UGUGCAAAUCUAUGCAAAACUGA	0
MIMAT0000073_MirBase_miR-19a_microRNA	CCAUACCCACAAAUUUUAC	UGUGCAAAUCUAUGCAAAACUGA	0
MIMAT0000073_MirBase_miR-19a_microRNA	UAUUGAAUAUCCUAUAA	UGUGCAAAUCUAUGCAAAACUGA	0
MIMAT0000073_MirBase_miR-19a_microRNA	UAAACGAACAUGAAAAUU	UGUGCAAAUCUAUGCAAAACUGA	0
MIMAT0000073_MirBase_miR-19a_microRNA	UAAACAUAUAACUUCUA	UGUGCAAAUCUAUGCAAAACUGA	0
MIMAT0000073_MirBase_miR-19a_microRNA	CACAAGUCAAACAAAUUUACAAA	UGUGCAAAUCUAUGCAAAACUGA	0
MIMAT0000073_MirBase_miR-19a_microRNA	CUGUCUUUAUUUCACCUUAUAAUU	UGUGCAAAUCUAUGCAAAACUGA	0
MIMAT0000073_MirBase_miR-19a_microRNA	UUCCAAAAUCAUAA	UGUGCAAAUCUAUGCAAAACUGA	0
MIMAT0000073_MirBase_miR-19a_microRNA	UUACAAACAAUUUGAUACUU	UGUGCAAAUCUAUGCAAAACUGA	0
MIMAT0000073_MirBase_miR-19a_microRNA	UAAUAUUACAAACU	UGUGCAAAUCUAUGCAAAACUGA	0
MIMAT0000073_MirBase_miR-19a_microRNA	ACAAUUGGAACUGUAACUUUG	UGUGCAAAUCUAUGCAAAACUGA	0
MIMAT0000073_MirBase_miR-19a_microRNA	UUAAAAAGUUGAAGAA	UGUGCAAAUCUAUGCAAAACUGA	0
MIMAT0000073_MirBase_miR-19a_microRNA	UUGUACUAAUUAUAUGCCUUAUUUCUU	UGUGCAAAUCUAUGCAAAACUGA	0
MIMAT0000073_MirBase_miR-19a_microRNA	ACAACAUGUUAAAAACUGUUUA	UGUGCAAAUCUAUGCAAAACUGA	0
MIMAT0000073_MirBase_miR-19a_microRNA	AUAAACCUAUUGUU	UGUGCAAAUCUAUGCAAAACUGA	0
MIMAT0000073_MirBase_miR-19a_microRNA	UAUUCUGUUAUUUACUUGUAC	UGUGCAAAUCUAUGCAAAACUGA	0
MIMAT0000073_MirBase_miR-19a_microRNA	UAAUUCUUUCACAC	UGUGCAAAUCUAUGCAAAACUGA	0
MIMAT0000073_MirBase_miR-19a_microRNA	AUCCAUCAAAACCA	UGUGCAAAUCUAUGCAAAACUGA	0
MIMAT0000073_MirBase_miR-19a_microRNA	ACACCUAUCCUUCU	UGUGCAAAUCUAUGCAAAACUGA	0
[truncated: 15,011 more rows]

## Sheet: Analysis1-Covid19-hMRNA-Compare
MiRNA name	SARS-CoV-RNA interaction energy	Max energy with human mRNAs in CLASH
MIMAT0000096_MirBase_miR-98_microRNA	-11.7	-10.7
MIMAT0000222_MirBase_miR-192_microRNA	-6.98	-6.7
MIMAT0003254_MirBase_miR-548b-3p_microRNA	-10.05	-6.1
MIMAT0004688_MirBase_miR-374a*_microRNA	-15.27	-10.9
MIMAT0000062_MirBase_let-7a_microRNA	-16.13	-25.1
MIMAT0000063_MirBase_let-7b_microRNA	-19.08	-25.9
MIMAT0000064_MirBase_let-7c_microRNA	-15.79	-23
MIMAT0000065_MirBase_let-7d_microRNA	-14.18	-22.1
MIMAT0000066_MirBase_let-7e_microRNA	-14.81	-24.4
MIMAT0000067_MirBase_let-7f_microRNA	-12.59	-20.6
MIMAT0000068_MirBase_miR-15a_microRNA	-8.45	-22.5
MIMAT0000069_MirBase_miR-16_microRNA	-8.32	-26.1
MIMAT0000070_MirBase_miR-17_microRNA	-7.68	-28.6
MIMAT0000071_MirBase_miR-17*_microRNA	-3.57	-25.3
MIMAT0000072_MirBase_miR-18a_microRNA	-9.41	-25.9
MIMAT0000073_MirBase_miR-19a_microRNA	-4.39	-16.9
MIMAT0000074_MirBase_miR-19b_microRNA	-4.42	-23.2
MIMAT0000075_MirBase_miR-20a_microRNA	-7.64	-25.4
MIMAT0000076_MirBase_miR-21_microRNA	-5.35	-21.2
MIMAT0000077_MirBase_miR-22_microRNA	-6.47	-26.8
MIMAT0000078_MirBase_miR-23a_microRNA	-11.76	-25.2
MIMAT0000080_MirBase_miR-24_microRNA	-7.17	-27.1
MIMAT0000081_MirBase_miR-25_microRNA	-7.38	-28.2
MIMAT0000082_MirBase_miR-26a_microRNA	-11.91	-23.6
MIMAT0000083_MirBase_miR-26b_microRNA	-13.46	-21.6
MIMAT0000084_MirBase_miR-27a_microRNA	-7.98	-23.7
MIMAT0000085_MirBase_miR-28-5p_microRNA	-6.43	-24.8
MIMAT0000086_MirBase_miR-29a_microRNA	-6.98	-19.7
MIMAT0000087_MirBase_miR-30a_microRNA	no interaction	-17.7
MIMAT0000088_MirBase_miR-30a*_microRNA	-9.18	-22
MIMAT0000089_MirBase_miR-31_microRNA	-9	-26.9
MIMAT0000090_MirBase_miR-32_microRNA	-6.37	-9.8
MIMAT0000091_MirBase_miR-33a_microRNA	-5.38	-15
MIMAT0000092_MirBase_miR-92a_microRNA	-5.45	-31.2
MIMAT0000093_MirBase_miR-93_microRNA	-6.9	-25.7
MIMAT0000095_MirBase_miR-96_microRNA	-4.98	-25.6
MIMAT0000097_MirBase_miR-99a_microRNA	no interaction	-24
MIMAT0000098_MirBase_miR-100_microRNA	-9.24	-15.9
MIMAT0000100_MirBase_miR-29b_microRNA	-4.15	-23.5
MIMAT0000101_MirBase_miR-103_microRNA	-8.88	-22.7
MIMAT0000103_MirBase_miR-106a_microRNA	-7.69	-21.6
MIMAT0000104_MirBase_miR-107_microRNA	-9.03	-25.5
MIMAT0000226_MirBase_miR-196a_microRNA	-11.1	-33
MIMAT0000227_MirBase_miR-197_microRNA	no interaction	-30.3
MIMAT0000242_MirBase_miR-129-5p_microRNA	-5.85	-19.1
MIMAT0000243_MirBase_miR-148a_microRNA	-5.72	-17.3
MIMAT0000244_MirBase_miR-30c_microRNA	no interaction	-25.9
MIMAT0000245_MirBase_miR-30d_microRNA	-0.76	-24.6
MIMAT0000250_MirBase_miR-139-5p_microRNA	-8.71	-13
MIMAT0000252_MirBase_miR-7_microRNA	-8.71	-21.3
MIMAT0000253_MirBase_miR-10a_microRNA	-8.17	-24.1
MIMAT0000254_MirBase_miR-10b_microRNA	-7.68	-18.3
MIMAT0000255_MirBase_miR-34a_microRNA	-5.43	-28.2
MIMAT0000256_MirBase_miR-181a_microRNA	-5.68	-25.3
MIMAT0000257_MirBase_miR-181b_microRNA	-8.58	-23.2
MIMAT0000258_MirBase_miR-181c_microRNA	-4.28	-21.3
MIMAT0000259_MirBase_miR-182_microRNA	-9.13	-30
MIMAT0000261_MirBase_miR-183_microRNA	-9.22	-24.4
MIMAT0000262_MirBase_miR-187_microRNA	-8.11	-16.6
MIMAT0000265_MirBase_miR-204_microRNA	-5.67	-23.1
MIMAT0000267_MirBase_miR-210_microRNA	-7.64	-25.5
MIMAT0000269_MirBase_miR-212_microRNA	no interaction	-16.4
MIMAT0000275_MirBase_miR-218_microRNA	no interaction	-23.5
MIMAT0000276_MirBase_miR-219-5p_microRNA	-2.14	-18
MIMAT0000278_MirBase_miR-221_microRNA	-8.06	-30.8
MIMAT0000279_MirBase_miR-222_microRNA	no interaction	-26.7
MIMAT0000281_MirBase_miR-224_microRNA	-9.47	-7.1
MIMAT0000318_MirBase_miR-200b_microRNA	-7.02	-23
MIMAT0000414_MirBase_let-7g_microRNA	-15.63	-17.9
MIMAT0000415_MirBase_let-7i_microRNA	-12.49	-18.4
MIMAT0000416_MirBase_miR-1_microRNA	-10.86	-8.4
MIMAT0000417_MirBase_miR-15b_microRNA	-6.31	-24.5
MIMAT0000418_MirBase_miR-23b_microRNA	-7.99	-25.1
MIMAT0000419_MirBase_miR-27b_microRNA	-10.39	-26.1
MIMAT0000420_MirBase_miR-30b_microRNA	no interaction	-22
MIMAT0000422_MirBase_miR-124_microRNA	-7.28	-21
MIMAT0000423_MirBase_miR-125b_microRNA	-8.4	-28.3
MIMAT0000424_MirBase_miR-128_microRNA	-7.1	-23.8
MIMAT0000425_MirBase_miR-130a_microRNA	-5.41	-16.9
MIMAT0000426_MirBase_miR-132_microRNA	no interaction	-22.4
MIMAT0000427_MirBase_miR-133a_microRNA	-5.54	-15.6
MIMAT0000430_MirBase_miR-138_microRNA	-7.1	-25.2
MIMAT0000431_MirBase_miR-140-5p_microRNA	-8.01	-14.3
MIMAT0000438_MirBase_miR-152_microRNA	-11.28	-20.1
MIMAT0000440_MirBase_miR-191_microRNA	-6.54	-28.4
MIMAT0000441_MirBase_miR-9_microRNA	-7.11	-15.9
MIMAT0000443_MirBase_miR-125a-5p_microRNA	-6.54	-23.7
MIMAT0000449_MirBase_miR-146a_microRNA	-5.18	-21.2
MIMAT0000450_MirBase_miR-149_microRNA	-7.72	-30.7
MIMAT0000455_MirBase_miR-185_microRNA	-11.77	-28.2
MIMAT0000456_MirBase_miR-186_microRNA	-7.09	-23.7
MIMAT0000457_MirBase_miR-188-5p_microRNA	-4.71	-11.6
MIMAT0000459_MirBase_miR-193a-3p_microRNA	-5.72	-21.5
MIMAT0000460_MirBase_miR-194_microRNA	-5.94	-18.4
MIMAT0000461_MirBase_miR-195_microRNA	-8.45	-17.1
MIMAT0000510_MirBase_miR-320a_microRNA	-11.77	-29.2
MIMAT0000617_MirBase_miR-200c_microRNA	-11.12	-23
MIMAT0000680_MirBase_miR-106b_microRNA	-7.97	-25.5
MIMAT0000681_MirBase_miR-29c_microRNA	-4.38	-16.8
MIMAT0000688_MirBase_miR-301a_microRNA	-3.22	-14.2
MIMAT0000689_MirBase_miR-99b_microRNA	-9.14	-22
MIMAT0000691_MirBase_miR-130b_microRNA	-6.08	-20.3
MIMAT0000692_MirBase_miR-30e_microRNA	no interaction	-24
MIMAT0000693_MirBase_miR-30e*_microRNA	-9.45	-17.8
MIMAT0000703_MirBase_miR-361-5p_microRNA	-7.07	-23.7
MIMAT0000707_MirBase_miR-363_microRNA	-6.57	-17.6
MIMAT0000710_MirBase_miR-365_microRNA	-4.76	-20.8
MIMAT0000727_MirBase_miR-374a_microRNA	-6.28	-13
MIMAT0000731_MirBase_miR-378*_microRNA	no interaction	-25
MIMAT0000732_MirBase_miR-378_microRNA	-4.45	-25.2
MIMAT0000750_MirBase_miR-340*_microRNA	no interaction	-18.7
MIMAT0000751_MirBase_miR-330-3p_microRNA	-7.64	-30.4
MIMAT0000752_MirBase_miR-328_microRNA	no interaction	-29.3
MIMAT0000753_MirBase_miR-342-3p_microRNA	-12.27	-27.2
MIMAT0000756_MirBase_miR-326_microRNA	-1.92	-28.5
MIMAT0000757_MirBase_miR-151-3p_microRNA	-3.72	-25.4
MIMAT0000759_MirBase_miR-148b_microRNA	no interaction	-25.6
MIMAT0000760_MirBase_miR-331-3p_microRNA	no interaction	-29.9
MIMAT0000761_MirBase_miR-324-5p_microRNA	-7.64	-29.5
MIMAT0000762_MirBase_miR-324-3p_microRNA	-3.99	-27
MIMAT0000764_MirBase_miR-339-5p_microRNA	no interaction	-28.1
MIMAT0000772_MirBase_miR-345_microRNA	-4.57	-23.4
MIMAT0000773_MirBase_miR-346_microRNA	no interaction	-27.9
MIMAT0001080_MirBase_miR-196b_microRNA	-7.42	-22.9
MIMAT0001340_MirBase_miR-423-3p_microRNA	-3.21	-29.3
MIMAT0001341_MirBase_miR-424_microRNA	-7.27	-21.5
MIMAT0001343_MirBase_miR-425*_microRNA	-3.06	-23.6
MIMAT0001412_MirBase_miR-18b_microRNA	-7.78	-18.9
MIMAT0001618_MirBase_miR-191*_microRNA	-6.19	-19
MIMAT0002173_MirBase_miR-483-3p_microRNA	no interaction	-18.2
MIMAT0002174_MirBase_miR-484_microRNA	no interaction	-30.9
MIMAT0002804_MirBase_miR-488*_microRNA	-5.36	-9.1
MIMAT0002809_MirBase_miR-146b-5p_microRNA	-5.6	-14.2
MIMAT0002819_MirBase_miR-193b_microRNA	no interaction	-28.8
MIMAT0002820_MirBase_miR-497_microRNA	-6.81	-22.5
MIMAT0002821_MirBase_miR-181d_microRNA	-7.83	-19.5
MIMAT0002834_MirBase_miR-520a-3p_microRNA	-1.65	-13.4
MIMAT0002871_MirBase_miR-500a*_microRNA	-6.53	-15.7
MIMAT0002872_MirBase_miR-501-5p_microRNA	-10.9	-24.9
MIMAT0002874_MirBase_miR-503_microRNA	-5.69	-28.4
MIMAT0002875_MirBase_miR-504_microRNA	no interaction	-22
MIMAT0002876_MirBase_miR-505_microRNA	-7.39	-22.6
MIMAT0002888_MirBase_miR-532-5p_microRNA	-11.62	-13.6
MIMAT0002891_MirBase_miR-18a*_microRNA	-5.77	-27.9
MIMAT0003150_MirBase_miR-455-5p_microRNA	-3.44	-19.7
MIMAT0003218_MirBase_miR-92b_microRNA	-8.18	-29.5
MIMAT0003239_MirBase_miR-574-3p_microRNA	-7.72	-28.5
MIMAT0003242_MirBase_miR-577_microRNA	-7.27	-13.6
MIMAT0003258_MirBase_miR-590-5p_microRNA	-6.21	-8.7
MIMAT0003266_MirBase_miR-598_microRNA	-6.94	-27.8
MIMAT0003283_MirBase_miR-615-3p_microRNA	no interaction	-29.8
MIMAT0003294_MirBase_miR-625_microRNA	-9.74	-18.6
MIMAT0003297_MirBase_miR-628-3p_microRNA	-10.94	-13.2
MIMAT0003301_MirBase_miR-33b_microRNA	-5.67	-21
MIMAT0003306_MirBase_miR-636_microRNA	-3.53	-34.8
MIMAT0003312_MirBase_miR-642a_microRNA	-10.69	-19.1
MIMAT0003322_MirBase_miR-652_microRNA	-4.89	-25.6
MIMAT0003339_MirBase_miR-421_microRNA	-10.12	-22.8
MIMAT0003393_MirBase_miR-425_microRNA	-3.68	-24.1
MIMAT0003880_MirBase_miR-671-5p_microRNA	-3.85	-33.8
MIMAT0003884_MirBase_miR-454*_microRNA	-8.03	-12
MIMAT0003885_MirBase_miR-454_microRNA	-7.72	-20.3
MIMAT0003886_MirBase_miR-769-5p_microRNA	-3.89	-25.5
MIMAT0003887_MirBase_miR-769-3p_microRNA	-4.76	-28.6
MIMAT0003888_MirBase_miR-766_microRNA	no interaction	-22.8
MIMAT0004481_MirBase_let-7a*_microRNA	-4	-12.1
MIMAT0004482_MirBase_let-7b*_microRNA	no interaction	-16.4
MIMAT0004486_MirBase_let-7f-1*_microRNA	-6.04	-17.1
MIMAT0004487_MirBase_let-7f-2*_microRNA	-2.22	-11.3
MIMAT0004488_MirBase_miR-15a*_microRNA	-4.95	-11.5
MIMAT0004491_MirBase_miR-19b-1*_microRNA	-8.75	-11.1
MIMAT0004493_MirBase_miR-20a*_microRNA	-5.61	-20.2
MIMAT0004496_MirBase_miR-23a*_microRNA	-8.49	-22.8
MIMAT0004502_MirBase_miR-28-3p_microRNA	-5.69	-18.6
MIMAT0004504_MirBase_miR-31*_microRNA	-3.45	-21.2
MIMAT0004506_MirBase_miR-33a*_microRNA	-2.57	-15
MIMAT0004507_MirBase_miR-92a-1*_microRNA	-8.55	-19.6
MIMAT0004509_MirBase_miR-93*_microRNA	no interaction	-28
MIMAT0004515_MirBase_miR-29b-2*_microRNA	-11.9	-18.8
MIMAT0004549_MirBase_miR-148a*_microRNA	-4.74	-13.2
MIMAT0004550_MirBase_miR-30c-2*_microRNA	-9.34	-21.6
MIMAT0004555_MirBase_miR-10a*_microRNA	-6.59	-19
MIMAT0004565_MirBase_miR-218-1*_microRNA	-5.56	-13.1
MIMAT0004568_MirBase_miR-221*_microRNA	-6.12	-11.6
MIMAT0004589_MirBase_miR-30b*_microRNA	-7.9	-16.5
MIMAT0004597_MirBase_miR-140-3p_microRNA	-8.61	-19.5
MIMAT0004602_MirBase_miR-125a-3p_microRNA	-12.37	-19
MIMAT0004603_MirBase_miR-125b-2*_microRNA	-7.14	-23.1
MIMAT0004609_MirBase_miR-149*_microRNA	-11.7	-24.2
MIMAT0004612_MirBase_miR-186*_microRNA	-5.24	-12.3
MIMAT0004672_MirBase_miR-106b*_microRNA	-10.53	-25.2
MIMAT0004673_MirBase_miR-29c*_microRNA	-8.57	-18.8
MIMAT0004676_MirBase_miR-34b_microRNA	no interaction	-23
MIMAT0004678_MirBase_miR-99b*_microRNA	-8.86	-21.9
MIMAT0004679_MirBase_miR-296-3p_microRNA	-9.86	-29.9
MIMAT0004680_MirBase_miR-130b*_microRNA	-6.88	-23.9
MIMAT0004681_MirBase_miR-26a-2*_microRNA	-6.98	-6.3
MIMAT0004682_MirBase_miR-361-3p_microRNA	-3.88	-19.4
MIMAT0004693_MirBase_miR-330-5p_microRNA	-5.34	-26.7
MIMAT0004694_MirBase_miR-342-5p_microRNA	-13	-20.8
MIMAT0004697_MirBase_miR-151-5p_microRNA	-7.16	-23.1
MIMAT0004748_MirBase_miR-423-5p_microRNA	-8.39	-27.4
MIMAT0004767_MirBase_miR-193b*_microRNA	-11.1	-14.9
MIMAT0004773_MirBase_miR-500a_microRNA	-8.6	-22.1
MIMAT0004776_MirBase_miR-505*_microRNA	-7.95	-21.3
MIMAT0004780_MirBase_miR-532-3p_microRNA	-10.69	-21.6
MIMAT0004784_MirBase_miR-455-3p_microRNA	-10.56	-23.1
MIMAT0004792_MirBase_miR-92b*_microRNA	-7.09	-21.5
MIMAT0004809_MirBase_miR-628-5p_microRNA	-5.63	-13.2
MIMAT0004810_MirBase_miR-629_microRNA	-10.78	-21.9
MIMAT0004819_MirBase_miR-671-3p_microRNA	-6.87	-21.4
MIMAT0004911_MirBase_miR-874_microRNA	no interaction	-28.1
MIMAT0004926_MirBase_miR-708_microRNA	-2.81	-21.9
MIMAT0004945_MirBase_miR-744_microRNA	-8.57	-30.3
MIMAT0004946_MirBase_miR-744*_microRNA	no interaction	-7.4
MIMAT0004949_MirBase_miR-877_microRNA	-12.81	-26.3
MIMAT0004950_MirBase_miR-877*_microRNA	no interaction	-31
MIMAT0004955_MirBase_miR-374b_microRNA	-5.11	-6.9
MIMAT0004957_MirBase_miR-760_microRNA	-8.83	-31
MIMAT0004958_MirBase_miR-301b_microRNA	-5.6	-9.1
MIMAT0004978_MirBase_miR-935_microRNA	no interaction	-25.8
MIMAT0004983_MirBase_miR-940_microRNA	-5.59	-28.4
MIMAT0004984_MirBase_miR-941_microRNA	-6.03	-20.6
MIMAT0004985_MirBase_miR-942_microRNA	-6.15	-19.4
MIMAT0004986_MirBase_miR-943_microRNA	no interaction	-25.7
MIMAT0005459_MirBase_miR-1224-3p_microRNA	no interaction	-18.2
MIMAT0005573_MirBase_miR-1225-3p_microRNA	no interaction	-18.7
MIMAT0005577_MirBase_miR-1226_microRNA	-5.63	-25.1
MIMAT0005580_MirBase_miR-1227_microRNA	no interaction	-19.4
MIMAT0005583_MirBase_miR-1228_microRNA	no interaction	-15
MIMAT0005584_MirBase_miR-1229_microRNA	no interaction	-25.8
MIMAT0005591_MirBase_miR-1236_microRNA	-6.79	-20.6
MIMAT0005792_MirBase_miR-320b_microRNA	-11.7	-28.7
MIMAT0005793_MirBase_miR-320c_microRNA	-12.92	-18.4
MIMAT0005794_MirBase_miR-1296_microRNA	no interaction	-28.7
MIMAT0005797_MirBase_miR-1301_microRNA	-6.94	-27.3
MIMAT0005825_MirBase_miR-1180_microRNA	-11.82	-19.3
MIMAT0005867_MirBase_miR-663b_microRNA	no interaction	-16.1
MIMAT0005891_MirBase_miR-1303_microRNA	-6.96	-33
MIMAT0005892_MirBase_miR-1304_microRNA	-8.98	-11.5
MIMAT0005901_MirBase_miR-1249_microRNA	-5.94	-20.7
MIMAT0005911_MirBase_miR-1260_microRNA	no interaction	-18.1
MIMAT0005927_MirBase_miR-1274a_microRNA	-6.12	-14.4
MIMAT0005930_MirBase_miR-1276_microRNA	-12.09	-12.5
MIMAT0005938_MirBase_miR-1274b_microRNA	-4.98	-10.6
MIMAT0005951_MirBase_miR-1307_microRNA	-2.78	-26.4
MIMAT0007881_MirBase_miR-1908_microRNA	-4.3	-20.1
MIMAT0007882_MirBase_miR-1909*_microRNA	-6.58	-23
MIMAT0007889_MirBase_miR-1914_microRNA	no interaction	-24.6
MIMAT0007891_MirBase_miR-1915*_microRNA	no interaction	-10.6
MIMAT0007892_MirBase_miR-1915_microRNA	-2.49	-10.9
MIMAT0009196_MirBase_miR-103-2*_microRNA	-5.96	-22.8
MIMAT0011163_MirBase_miR-548q_microRNA	-6.64	-12
MIMAT0014979_MirBase_miR-3117_microRNA	-5.46	-23.5
MIMAT0015031_MirBase_miR-3157_microRNA	-8.53	-17.1
MIMAT0015041_MirBase_miR-1260b_microRNA	no interaction	-27.3
MIMAT0015053_MirBase_miR-3176_microRNA	no interaction	-19.7
MIMAT0015061_MirBase_miR-3181_microRNA	no interaction	-27
MIMAT0015069_MirBase_miR-3187_microRNA	-4.34	-23.5
MIMAT0015072_MirBase_miR-320e_microRNA	-12.82	-16
MIMAT0015085_MirBase_miR-3200-3p_microRNA	no interaction	-22.6
MIMAT0015378_MirBase_miR-3065-3p_microRNA	-6.85	-16.9
MIMAT0016847_MirBase_miR-378c_microRNA	-6.03	-9.2
MIMAT0016888_MirBase_miR-4326_microRNA	no interaction	-19.7
MIMAT0017994_MirBase_miR-3615_microRNA	no interaction	-19.9
MIMAT0018001_MirBase_miR-3620_microRNA	no interaction	-16.5
MIMAT0018004_MirBase_miR-3622a-3p_microRNA	-7.55	-18.5
MIMAT0018183_MirBase_miR-3909_microRNA	-4.4	-19.4
MIMAT0018205_MirBase_miR-3928_microRNA	-5.96	-15
MIMAT0018359_MirBase_miR-3943_microRNA	-3.92	-17.9

## Sheet: Analysis2-IntaRNA-Energy
SARS-CoV-2 UCR	miRNA sequence	Interaction energy	Interaction energy/ best possible interaction energy
UAUUCUGUUAUUUACUUGUAC	UGGCAAGUAGGUGAUAGGAUGU	-21.37	0.539783
UCUUUACCAACCACCACAAACCUCUAU	GGUGGUUCAGUGGUAGAA	-17.2	0.535659
UAAAAUGAAUUAUC	UAUAUUCUGCUGUUUUGUGAGA	-0.06	0.468116
UUGUACUAAUUAUAUGCCUUAUUUCUU	UGAGGUAGUAGUUUGUACAGUU	-15.63	0.463661
UCUUUACCAACCACCACAAACCUCUAU	AAGUUGUUCGUGGUGGAUUCG	-15.54	0.446167
UUAAAAAUCUGAAUUCUUC	UGAGGAAGUAGAUUUUAUA	-11.2	0.440079
AAACUAUUUUUAGAGAUACU	UUUGUUUCUGAAAUCUAGUUG	-12.31	0.43637
UAAAAUGAAUUAUC	UAUAUUCUGCUGUUUUGUGAGA	-0.06	0.421741
GCUCUCACUCAACAUGG	UGUUGAGGGUGAGCAAAAGUCA	-15.4	0.413978
ACUCAAUUACCCCCUGCA	CGGGGGGUGGCGGGGAGGU	-19.23	0.411777
UUUACUCAACCGCUACUUUAGAC	AGAGGUAGUAGGUUGCAUAGU	-14.11	0.393584
AUAAGAAACCUGCUUCAA	UGAGGAAGUAGAUUUUAUA	-9.95	0.390963
UUGUACUAAUUAUAUGCCUUAUUUCUU	UGAGGUAGUAGAUUGUAUAGU	-12.63	0.388615
UCUUGUCUGUUAAUC	UGACCUAUGAAUUGACAGACAGU	-14.03	0.385334
UUUACUCAACCGCUACUUUAGAC	CGGGGGGUGGCGGGGAGGU	-17.98	0.385011
UUAGAUAUAUGAAUUCA	ACAAUUCUGUGUAUCUGAUC	-11.33	0.380329
UUUACUCAACCGCUACUUUAGAC	GGUGGUUCAGUGGUAGAA	-12.15	0.378387
CACAAGUCAAACAAAUUUACAAA	AGAGGUAAAAAUUUGAUUUGACU	-11.42	0.376898
ACUCAAUUACCCCCUGCA	GCGGGACUGGGCGAGUUGAGC	-16	0.375675
ACUCAAUUACCCCCUGCA	GGGGCCGGGGGUGGGGGU	-16.46	0.374858
UUUUACAAUUAAUUG	ACUGCAGACUCGUCCUGUGAGG	-0.03	0.360555
UUGUUAAAAUUUAUUG	UGAGAACUGAAUUCCAUGGGUU	-0.02	0.360555
UUGUACUAAUUAUAUGCCUUAUUUCUU	ACUUGGAUGGGAGACCGCC	-0.04	0.36029
CUUUACUUGCUUUACA	UGAGGAAGUAGAUUUUAUA	-9.14	0.359136
ACUCAAUUACCCCCUGCA	UGGGGCCGGGGGUGGGGG	-15.78	0.357418
UUGUACUAAUUAUAUGCCUUAUUUCUU	AGGCAGUGUAGUUAGCUGAUU	-11.6	0.354632
UAAACAUAUAACUUCUA	UGAGGUAGUAGGUUGUAUGGUU	-11.74	0.354092
UUUACUCAACCGCUACUUUAGAC	UGAGGUAGUAAGUUGUAUUGUU	-11.7	0.354092
ACCAAACCAACCAUAUCCAA	AAUAAUACAUGGUUGAUCUU	-9.21	0.353009
ACUCAAUUACCCCCUGCA	GUGGGGGGCCGGGGUGGGG	-16.45	0.351796
ACUCAAUUACCCCCUGCA	CGGGGCCGGGGGUGGGGA	-15.24	0.350103
UCUUUACCAACCACCACAAACCUCUAU	GUGGGGGGCCGGGGUGGGG	-16.25	0.347519
UUUACUCAACCGCUACUUUAGAC	UGAGGUAGUAGUUUGUACAGUU	-11.45	0.339662
UUACAAACAAUUUGAUACUU	UGAGGUAGUAAGUUGUAUUGUU	-10.88	0.337789
UUGUACUAAUUAUAUGCCUUAUUUCUU	UGAGGUAGUAAGUUGUAUUGUU	-10.88	0.337789
UUGUGCAAACUUUA	UGAGGUAGUAGUUUGUACAGUU	-11.31	0.335509
UAUUCUGUUAUUUACUUGUAC	AGCCAGCAGUAGGACAUCCCCC	-0.01	0.335285
UUUACUCAACCGCUACUUUAGAC	UGAGGUAGUAGGUUGUAUAGU	-16.15	0.335285
UUUACUCAACCGCUACUUUAGAC	UGAGGUAGUAGGUUGUAUGGUU	-15.79	0.335285
UUGUACUAAUUAUAUGCCUUAUUUCUU	UGAGGUAGUAGGUUGUAUAGU	-12.43	0.335285
ACACCUAUCCUUCU	UUCAAGUAAUCCAGGAUAGGCU	-11.91	0.335115
ACACCUAUCCUUCU	UUCAAGUAAUCCAGGAUAGGCU	-11.91	0.335115
ACUCAAUUACCCCCUGCA	CACACUGAUCACCAGGGGGC	-12.81	0.331951
UUGUGCAAACUUUA	UAUUGCACAUUACUAAGUUG	-9.01	0.33125
AAAGAACUUCACAACUGCUC	UUCACAGUGGCUAAGUUCUG	-10.94	0.329916
AAAGAACUUCACAACUGCUC	UGCCAUCAGUGGUUGUGAGCG	-11.64	0.32798
AAAGAACUUCACAACUGCUC	UGCCAUCAGUGGUUGUGAGCG	-11.64	0.32798
GCUCUCACUCAACAUGG	UCUGACUGAGAGCUUAGGCCU	-12.14	0.326169
CACAUGCUUUUCCA	AUAGGUCAGGGCAUGUGCAGGA	-13.89	0.326133
ACUCAAUUACCCCCUGCA	UGAGGGGUGAUUAGGGCCAGC	-13.65	0.325698
ACUCAAUUACCCCCUGCA	UGAGGGGUGAUUAGGGCCAGC	-13.65	0.325698
ACUCAAUUACCCCCUGCA	UGAGGGGUGAUUAGGGCCAGC	-13.65	0.325698
AUUGUUUUUAUGUGUGUU	UGAAACAUGGAAGCACUUACU	-10.77	0.325673
UAUUCUGUUAUUUACUUGUAC	UUCAAGUAAUCCAGGAUAGGCU	-11.56	0.325267
UAUUCUGUUAUUUACUUGUAC	UUCAAGUAAUCCAGGAUAGGCU	-11.56	0.325267
GCUCUCACUCAACAUGG	UAGGUAGUUUCAUGUUGUUGGGA	-11.92	0.323386
CUGUCUUUAUUUCACCUUAUAAUU	AAGGUAGAUAGAACAGGUCUUGU	-11.91	0.320334
CACAUGCUUUUCCA	AGUGGCAGAGCAUUUGACU	-10.33	0.319715
GCUCUCACUCAACAUGG	CGGGGUGGGGGCGGGGAGGC	-16.34	0.31964
UUUACUCAACCGCUACUUUAGAC	AAUAAUACAUGGUUGAUCUU	-8.28	0.317363
AAUGGGUGAAUGAUUU	UCAGUAACAAAGAUUCAUCCUUG	-10.01	0.316272
UUACCCACUUACUAAA	UUGGUGCUGUUAGUGGGUGCA	-11.44	0.315673
UUUACUCAACCGCUACUUUAGAC	UGAGGUAGUAGAUUGUAUAGU	-10.25	0.315385
ACUCAAUUACCCCCUGCA	UGCACUGACCACCAGGGGGC	-12.47	0.314343
ACUCAAUUACCCCCUGCA	UGCACUGACCACCAGGGGGC	-12.47	0.314343
CUUUAAUUUAACCGUUU	AAAUUAGCAACUGUUGCAGAGC	-0.03	0.313568
CUGUCUUUAUUUCACCUUAUAAUU	GCUGGAGGAGAUGGAGGCUC	-13.02	0.313131
UUGUACUAAUUAUAUGCCUUAUUUCUU	UAAGGUGCAUCUAGUGCAGAU	-9.51	0.312521
AAUGGGUGAAUGAUUU	AUUCCAAGAUGUGUCAUCCAUG	-10.07	0.312248
UCUUUACCAACCACCACAAACCUCUAU	UAACACUGUCUGGUAAAGAUG	-9.59	0.31187
UUGUACUAAUUAUAUGCCUUAUUUCUU	UUUAAGUAAUCUGAAGGCAUU	-9.05	0.311746
ACAAUUGGAACUGUAACUUUG	UUACAGUUGUUCAACCAGUUACU	-10.61	0.311601
AUUUUUGUACUUGUUACU	UUGCAGUAACAGGUGUGAACAUU	-10.83	0.311207
GCUCUCACUCAACAUGG	CAUGCCUUGAGUGUAGGACCG	-11.68	0.311052
ACAAUUGGAACUGUAACUUUG	UGGAGAGAAAGGCAGUUCCUGA	-11.77	0.310227
ACAAUUGGAACUGUAACUUUG	UGGAGAGAAAGGCAGUUCCUGA	-11.77	0.310227
UCUUUACCAACCACCACAAACCUCUAU	AGGUGGAGGCGGGGAGGGGGG	-16.21	0.308762
UUGUACUAAUUAUAUGCCUUAUUUCUU	AAGGGCUGUUUUGGUACCGGAAA	-11.72	0.307531
UUUACUCAACCGCUACUUUAGAC	UGAAGUGCGCCUUCCUGAGUAGA	-12.05	0.307006
CUGUCUUUAUUUCACCUUAUAAUU	UGUUGAGGGUGAGCAAAAGUCA	-11.42	0.306989
AUAAGAAACCUGCUUCAA	UGAGGUAGUAGGUUGUAUAGU	-10.5	0.304405
UUGUACUAAUUAUAUGCCUUAUUUCUU	UGAGGUAGUAGGUUGUAUGGUU	-11.07	0.304348
AAUAAUUAAUCUUGUACAA	AAUAAUACAUGGUUGAUCUU	-7.91	0.303181
CAAGCUUUGUUAAA	AGUGGCAGAGCAUUUGACU	-9.76	0.302074
UUGUACUAAUUAUAUGCCUUAUUUCUU	AUUUAAGUAAUCUGAAGGCAUU	-9.06	0.301698
UUGUACUAAUUAUAUGCCUUAUUUCUU	GAAGAAAUUAAGGAAGGACU	-8.95	0.300034
ACUCAAUUACCCCCUGCA	GGAGGCGGGGAGGGGGGUG	-14.31	0.299498
ACACCUAUCCUUCU	GGAGGCGGGGAGGGGGGUG	-14.31	0.299498
CUUUACUUGCUUUACA	UGGAAUGUAAAGAAGUAUGUAU	-10.36	0.298989
UUACAAACAAUUUGAUACUU	UGAGGUAGUAGGUUGUAUGGUU	-10.17	0.298989
AAAUGAUUGCUCAA	UCAAGAGCAAUAACGAAAAAUGU	-9.61	0.298355
ACACCUAUCCUUCU	GAAGAAAUUAAGGAAGGACU	-8.86	0.297016
AAUAAUUAAUCUUGUACAA	UAAUUUUAUGUAUAAGCUAGU	-7.46	0.29568
CACAAGUCAAACAAAUUUACAAA	UCUUUGGUUAUCUAGCUGUAUGA	-0.02	0.295673
AAUCAUCAUCUAAA	UGGAUGAUGCACCCCGGAAU	-9.99	0.295126
GCUCUCACUCAACAUGG	UUAUAAAACAUCAAGUGAGAUG	-7.36	0.295108
UUUAUUACCCUGACA	AUAGGUCAGGGCAUGUGCAGGA	-12.5	0.293496
CCAUACCCACAAAUUUUAC	UGUAGAAUAAGUGGGAGGCCCC	-10.76	0.293188
GCUCUCACUCAACAUGG	AUGCUGAAUGACCUUGAGAGC	-10.59	0.292784
AUAAACCUAUUGUU	AUAAGACGAACAAAAGGUUUG	-7.97	0.292477
AUCCAUCAAAACCA	UAAUACUGCCGGGUAAUGAUGGA	-11.12	0.291864
CUUUAAUUUAACCGUUU	AAUAAUACAUGGUUGAUCUU	-7.6	0.291299
AUAAGAAACCUGCUUCAA	UGAGGUAGUAGUUUGUACAGUU	-9.8	0.290715
AAUGGGUGAAUGAUUU	UUACAGUUGUUCAACCAGUUACU	-9.87	0.289868
UUUACUCAACCGCUACUUUAGAC	AAGUUGUUCGUGGUGGAUUCG	-10.09	0.289693
UAUUGAAUAUCCUAUAA	AGCAAGGAUGUCAAACUCG	-9.05	0.289137
ACUCAAUUACCCCCUGCA	AGAUCAGAAGGUGAUUGUGGCU	-10.48	0.288387
UUGUACUAAUUAUAUGCCUUAUUUCUU	UGAGGUAGUAAGUUGUAUUGUU	-10.88	0.288136
CACAUGCUUUUCCA	UGGAAUGUAAAGAAGUAUGUAU	-10.86	0.288136
UUACAAACAAUUUGAUACUU	UGAGGUAGUAGAUUGUAUAGU	-9.33	0.287077
UUUACUCAACCGCUACUUUAGAC	UGAGGAAGUAGAUUUUAUA	-7.29	0.286444
CUGUCUUUAUUUCACCUUAUAAUU	AGGUGGAGGCGGGGAGGGGGG	-15.03	0.286286
AUAAGAAACCUGCUUCAA	UGAGGUAGUAGAUUGUAUAGU	-9.3	0.286154
UAAUAUUACAAACU	UUUUGUGAUGUGUUCCUAAUA	-8.29	0.285567
AAUUUGCUGAUGAUU	ACUUGCAUCAGCUGAUGGUG	-8.8	0.28479
UUGUACUAAUUAUAUGCCUUAUUUCUU	UGAGAUGAAGCACUGUAGCU	-9.03	0.283072
UCUUGAAACUGCUCAA	UAGGUAGUUUCAUGUUGUUGGGA	-10.43	0.282963
AUAAGAAACCUGCUUCAA	GGAGGCGGGGAGGGGGGUG	-13.48	0.282126
UCUUGAAACUGCUCAA	AAGAUGAGCAGCUCUGAACC	-9.81	0.281978
UAAACAUAUAACUUCUA	UGAGGUAGUAAGUUGUAUUGUU	-9.35	0.281972
ACCAAACCAACCAUAUCCAA	UGAGGUAGUAGGUUGUAUGGUU	-9.35	0.281972
CAAGCUUUGUUAAA	CACUGUGAGCAGAGCUAUCA	-9.44	0.281539
UUUACUCAACCGCUACUUUAGAC	UGAGGUAGUAAGUUGUAUUGUU	-11.7	0.281517
CUGUCUUUAUUUCACCUUAUAAUU	UGAGGGGUGAUUAGGGCCAGC	-11.76	0.280601
CUGUCUUUAUUUCACCUUAUAAUU	UGAGGGGUGAUUAGGGCCAGC	-11.76	0.280601
CUGUCUUUAUUUCACCUUAUAAUU	UGAGGGGUGAUUAGGGCCAGC	-11.76	0.280601
CUGUCUUUAUUUCACCUUAUAAUU	ACAUGGAAAUGAACUCAGAGA	-9.32	0.280469
UUUAUUACCCUGACA	AGGGUGAUGCAUCUGGAACCAGA	-11.14	0.280463
ACUCAAUUACCCCCUGCA	CUCCCACAUGCAGGGUUUGCA	-9.72	0.280439
AAUAAUUAAUCUUGUACAA	AGCAGCAUUGUACAGGGCU	-9.44	0.280119
AAUGGGUGAAUGAUUU	UGAUUAUCACCUGUGCCAGUAGA	-10.72	0.279676
CUGUCUUUAUUUCACCUUAUAAUU	UGAGAUGAAGCACUGUAGCU	-8.91	0.27931
UUUACUCAACCGCUACUUUAGAC	CGGGGUGGGGGCGGGGAGGC	-14.27	0.279147
CUUUACUUGCUUUACA	UGGCAAGUAGGUGAUAGGAUGU	-11.01	0.278101
CACAUGCUUUUCCA	GGUAGAGCAUGGGACUCUUAAUCC	-10.7	0.277202
AAUGGGUGAAUGAUUU	UUGUUCAGCCGUUGCCUCUCUCU	-11.94	0.277159
UAUUGAAUAUCCUAUAA	GGUGGUUCAGUGGUAGAA	-8.84	0.275304
AAAGAACUUCACAACUGCUC	UGUUGAUCAGUUGUUGCCU	-8.55	0.275185
AAAGAACUUCACAACUGCUC	UGUUGAUCAGUUGUUGCCU	-8.55	0.275185
ACUCAAUUACCCCCUGCA	CACUGACCACCAGGGGGCAGC	-10.39	0.275013
UUUAUUACCCUGACA	UUCUUCCAGAGGUGAUGGAACU	-8.75	0.274295
UUUAUUACCCUGACA	UGUUGAGGGUGAGCAAAAGUCA	-10.17	0.273387
CUGUCUUUAUUUCACCUUAUAAUU	UAAGGUGCAUCUAGUGCAGAU	-8.3	0.272757
UCUUUACCAACCACCACAAACCUCUAU	CAUGGAGGUCUCUGUCUGGCU	-10.93	0.272637
UUGUACUAAUUAUAUGCCUUAUUUCUU	GAGAGAUCAGAGGCGCAGAGU	-11.4	0.272597
AUAAGAAACCUGCUUCAA	AGAGGUAGUAGGUUGCAUAGU	-9.77	0.272524
UCUUGAAACUGCUCAA	CGCCAGCAGCUGGUGUGAGCAGU	-10.81	0.272429
UCUUUACCAACCACCACAAACCUCUAU	CCAUGCAACAUUUUGGUGGUG	-8.66	0.272327
ACUCAAUUACCCCCUGCA	CGGGGUGGGGGCGGGGAGGC	-13.92	0.2723
AUUGUUUUUAUGUGUGUU	UAGCAGCACAUAAUGGUUUG	-8.49	0.27168
UUACAAACAAUUUGAUACUU	UGAGGUAGUAAGUUGUAUUGUU	-10.88	0.271635
CUUUACUUGCUUUACA	UUAUAAAGCAAUGAGACUGAUU	-8.18	0.270413
UUACCCACUUACUAAA	CGCAGUGCUGUCAGUGGGU	-9.74	0.270105
CUGUCUUUAUUUCACCUUAUAAUU	UUUAAGUAAUCUGAAGGCAUU	-7.84	0.270065
UAUUCUGUUAUUUACUUGUAC	AAGGUAGAUAGAACAGGUCUUGU	-10.04	0.270038
UUUAUUACCCUGACA	UAAUACUGUCUGGUAAUGCCG	-8.8	0.269856
UUUAUUACCCUGACA	UGAGGUAGUAGAUUGUAUAGU	-8.77	0.269846
AAUAAUUAAUCUUGUACAA	UGAUGUAGUAGAUUGAAUAGU	-9.19	0.269646
AUAAACCUAUUGUU	UGAGGUAGUAGGUUGUAUGGUU	-9.18	0.269646
UCUUGUCUGUUAAUC	CGAGUUUGACAGGCUUGCUCU	-9.24	0.269074
UUUACUCAACCGCUACUUUAGAC	AGAUAUUGCACGGUUGAUCUCU	-9.67	0.26891
ACAAUUGGAACUGUAACUUUG	UUGCAGUAACAGGUGUGAACAUU	-9.35	0.268678
UUGUUAAAAUUUAUUG	UGAGGAAGUAGAUUUUAUA	-6.82	0.267976
CUGUCUUUAUUUCACCUUAUAAUU	UGGAGAGAAAGGCAGUUCCUGA	-10.13	0.267001
CUGUCUUUAUUUCACCUUAUAAUU	UGGAGAGAAAGGCAGUUCCUGA	-10.13	0.267001
GCUCUCACUCAACAUGG	GGGGCCGGGGGUGGGGGU	-11.68	0.265999
UUACCCACUUACUAAA	UGUAGAAUAAGUGGGAGGCCCC	-9.76	0.26594
UAAACAUAUAACUUCUA	UGAGGUAGUAAGUUGUAUUGUU	-9.35	0.264928
CACAUGCUUUUCCA	UGGGAAAGUGCUUUGACAUAGU	-9.47	0.263935
AUUUUUGUACUUGUUACU	ACGCUGUCAGCGGGUGCAAG	-9.11	0.263295
AUUUUUGUACUUGUUACU	ACGCUGUCAGCGGGUGCAAG	-9.11	0.263295
GAAGAGCAACCAAUG	ACAGUAGUCUGCACAUUGGUU	-8.48	0.263191
GAAGAGCAACCAAUG	ACAGUAGUCUGCACAUUGGUU	-8.48	0.263191
AAUAAUUAAUCUUGUACAA	AAUCGUACAGGGUCAUCCACU	-9.22	0.263053
UCUUGUCUGUUAAUC	UGAGCUAAGUUGAUGGACAUAG	-9.15	0.262705
AAUGGGUGAAUGAUUU	UAUUCACUUAUCUCCCAGCCUACA	-10.67	0.262356
UGUAUUAAUGCUAAC	AGCAGCAUUGUACAGGGCU	-8.83	0.262018
UUUGAUAAAAAUCUCUAUGA	CAUGGAGGUCUCUGUCUGGCU	-10.49	0.261661
ACUCAAUUACCCCCUGCA	GGUGGUUCAGUGGUAGAA	-8.4	0.261601
AUAAGAAACCUGCUUCAA	AGGGGGAGGCGGGGAGGGGG	-13.5	0.261172
CUGUCUUUAUUUCACCUUAUAAUU	AUUUAAGUAAUCUGAAGGCAUU	-7.84	0.261072
CUGUCUUUAUUUCACCUUAUAAUU	UUCUUCCAGAGGUGAUGGAACU	-8.31	0.260502
AAUGGGUGAAUGAUUU	UACCCAUUGCAUAUCGGAGUUG	-9.16	0.260006
UCUUUACCAACCACCACAAACCUCUAU	CCCCCUGGUGGUCAGUGCACA	-10.87	0.259799
UCUUUACCAACCACCACAAACCUCUAU	AACGUAGAGGAAAUUCCACCU	-7.46	0.259388
UUGUACUAAUUAUAUGCCUUAUUUCUU	AUAGGUCAGGGCAUGUGCAGGA	-11.03	0.258981
AAAGAACUUCACAACUGCUC	UGGCAGUUGGACAUCCCCUGAAA	-10.1	0.258974
UUUACUCAACCGCUACUUUAGAC	GUGGGGGGCCGGGGUGGGG	-12.1	0.258768
UUGUGCAAACUUUA	AAUUGCACGGUAUCCAUCUG	-8.17	0.258381
UUGUACUAAUUAUAUGCCUUAUUUCUU	GCUGGAGGAGAUGGAGGCUC	-10.73	0.258057
UUAAAAAUCUGAAUUCUUC	CAAAGAAUUCUCCUUUUUGGCUA	-7.91	0.257487
UCUUUACCAACCACCACAAACCUCUAU	UUUGGCAAUGGUAGAACUCACA	-9.2	0.257055
AAUGGGUGAAUGAUUU	UGCCCCAUUUGCCCCUCAGGAG	-11.14	0.256978
AAAGAACUUCACAACUGCUC	CCAAACCAGUUGUGCCUGUAGC	-9.64	0.256724
GAAGAGCAACCAAUG	UUACAGUUGUUCAACCAGUUACU	-8.74	0.256681
AAACUAUUUUUAGAGAUACU	GAGGAUCUCAGGAGGUAGUCU	-9.88	0.256623
ACACCUAUCCUUCU	CGGGGGGUGGCGGGGAGGU	-11.98	0.256531
UUUACUCAACCGCUACUUUAGAC	UUUAAGUAAUCUGAAGGCAUU	-7.44	0.256287
AAUCAUCAUCUAAA	UUAGGUGAUGCACCCUGGAAU	-7.65	0.256196
UAACCUUAACUUGC	UGAGGUAGUAGGUUGUAUGGUU	-9.33	0.255942
AAUAAUUAAUCUUGUACAA	CCAAAUUCACGCAAGAUUUG	-6.83	0.255901
AAUAAUUAAUCUUGUACAA	CCAAAUUCACGCAAGAUUUG	-6.83	0.255901
AAUAAUUAAUCUUGUACAA	CCAAAUUCACGCAAGAUUUG	-6.83	0.255901
AAAUGAUUGCUCAA	AAGAUGAGCAGCUCUGAACC	-8.9	0.255821
UAAACGAACAUGAAAAUU	UAGGUAGUUUCAUGUUGUUGGGA	-9.42	0.255562
AAUUUGCUGAUGAUU	AUCUCAGGUUCGUCAGCCCAUG	-9.8	0.255408
ACUCAAUUACCCCCUGCA	UAAUACUGCCGGGUAAUGAUGGA	-9.73	0.255381
UUACCCACUUACUAAA	UGGCAAGUAGGUGAUAGGAUGU	-10.11	0.255368
AUCCAUCAAAACCA	UGAGCUAAGUUGAUGGACAUAG	-8.88	0.254953
UUUAUUACCCUGACA	UAAUACUGCCGGGUAAUGAUGGA	-9.71	0.254856
CUGUCUUUAUUUCACCUUAUAAUU	UGAGGAAGUAGAUUUUAUA	-6.48	0.254617
UCUUGUCUGUUAAUC	ACUGAGACGACAGACUGCU	-8.49	0.253964
AUAAGAAACCUGCUUCAA	UGAGGUAGUAAGUUGUAUUGUU	-9.15	0.253929
AUAAACCUAUUGUU	UGAGGUAGUAGGUUGUAUAGU	-9.14	0.253929
AUAAGAAACCUGCUUCAA	AGGUGGAGGCGGGGAGGGGGG	-13.31	0.253524
GAAAUUAAAUUGGCAAA	AGUAGUUAUUCUGCCUGCCAGU	-8.88	0.253497
ACACCUAUCCUUCU	AAUCCUUGGAACCUAGGUGUGAG	-9.54	0.252048
CUUUACUUGCUUUACA	UGAGGUAGUAGAUUGUAUAGU	-8.19	0.252
CUGUCUUUAUUUCACCUUAUAAUU	CGGGGUGGGGGCGGGGAGGC	-12.88	0.251956
UCUUUACCAACCACCACAAACCUCUAU	UAUGGCACUGGUAGAAUUCACU	-9.22	0.251295
UCUUGAAACUGCUCAA	CACUGUGAGCAGAGCUAUCA	-8.42	0.251118
AUCCAUCAAAACCA	AAGUUGUUCGUGGUGGAUUCG	-8.74	0.250933
AAAGAACUUCACAACUGCUC	CGCCAGCAGCUGGUGUGAGCAGU	-9.95	0.250756
CACAUGCUUUUCCA	UGGAAUGUAAAGAAGUAUGUAU	-10.86	0.249733
UCUUUACCAACCACCACAAACCUCUAU	UGGAAUGUAAAGAAGUAUGUAU	-9.17	0.249275
AUAAGAAACCUGCUUCAA	UGAGGUAGUAGGUUGUAUGGUU	-10.54	0.249199
UUUACUCAACCGCUACUUUAGAC	AUUUAAGUAAUCUGAAGGCAUU	-7.48	0.249084
CACAUGCUUUUCCA	GGAGGCGGGGAGGGGGGUG	-11.9	0.249058
CACAUGCUUUUCCA	UUUAAGUAAUCUGAAGGCAUU	-7.23	0.249053
UUGUGCAAACUUUA	UGUUUGCAGAGGAAACUGAGA	-8.15	0.248627
ACACCUAUCCUUCU	UGGCAAGUAGGUGAUAGGAUGU	-9.82	0.248042
CCAUACCCACAAAUUUUAC	UUGGGCGCUGGCAGUGGGUGU	-10.41	0.247739
AUAAGAAACCUGCUUCAA	UGCUGUGUGAGCAGGUGUCGGA	-9.76	0.247716
UCAAGAAAUUCAAC	AAAGAAACAGAAUUUCCGGAGG	-8.08	0.247625
GAAGAGCAACCAAUG	UGACUCUCUGCUCUUCCCUCCAGG	-11.84	0.247233
AAAGAACUUCACAACUGCUC	UGAGGUAGUAGUUUGUACAGUU	-8.33	0.247108
AUAAGAAACCUGCUUCAA	UGGCAAGUAGGUGAUAGGAUGU	-9.78	0.247032
AAAGAACUUCACAACUGCUC	GGUGGUUCAGUGGUAGAA	-7.93	0.246964
AAUGGGUGAAUGAUUU	UGUUCGCCUGCCAGCUUAGG	-8.94	0.246757
AAAGAACUUCACAACUGCUC	UUGCAGUUGGACAUCCCCUGAG	-9.23	0.246462
CUUUAAUUUAACCGUUU	AGAUAUUGCACGGUUGAUCUCU	-8.86	0.246385
CGAAUACCAUAAUGAAU	UGGAGUGUGACAAUGGUGUUU	-8.53	0.246105
AUAAGAAACCUGCUUCAA	CCGGGGGAGGCGGGGAGG	-10.24	0.246095
ACAACAUGUUAAAAACUGUUUA	UAGGUAGUUUCAUGUUGUUGGGA	-9.07	0.246066
GCUCUCACUCAACAUGG	UGUAGAAUAAGUGGGAGGCCCC	-9.03	0.246049
AACACGUUUGAAAU	UUUUGCGAUGUGUUCCUAAUA	-7.49	0.245977
AUAAACCUAUUGUU	UGGAGUGUGACAAUGGUGUUU	-8.51	0.245528
CUUUACUUGCUUUACA	UGGAAUGUAAAGAAGUAUGUAU	-10.36	0.245192
UCUUGUCUGUUAAUC	UUAAUAUCGGACAACCAUUGU	-7.08	0.244306
AAAUGAUUGCUCAA	UUGAUCAGUCGUUGCCUCUCUCU	-9.9	0.244143
AAAUGAUUGCUCAA	UUGAUCAGUCGUUGCCUCUCUCU	-9.9	0.244143
AAAUGAUUGCUCAA	UUGAUCAGUCGUUGCCUCUCUCU	-9.9	0.244143
AUUGUUUUUAUGUGUGUU	ACAUGGAAAUGAACUCAGAGA	-8.11	0.244057
AAAGAACUUCACAACUGCUC	UUACAGUUGUUCAACCAGUUACU	-8.31	0.244053
UUUACUCAACCGCUACUUUAGAC	UAGGUAGUUUCAUGUUGUUGGGA	-8.99	0.243896
UAUUGAAUAUCCUAUAA	UGGCAAGUAGGUGAUAGGAUGU	-9.64	0.243496
UAUUCUGUUAUUUACUUGUAC	UGAGGAAGUAGAUUUUAUA	-6.19	0.243222
UAAACGAACAUGAAAAUU	CAGCAGCAAUUCAUGUUUUGA	-7.4	0.243101
UCUUGAAACUGCUCAA	UGAAUGGCACUUUCUGAGUAGU	-8.54	0.241584
AUAAGAAACCUGCUUCAA	UUUGCAGGUUCGAUUCUGGUCA	-8.36	0.24127
CACAUGCUUUUCCA	AUUUAAGUAAUCUGAAGGCAUU	-7.24	0.241092
CUGUCUUUAUUUCACCUUAUAAUU	UGAGGUAGUAGAUUGUAUAGU	-7.82	0.240615
GAGAAUUUGACUAAAG	GUCCAGUUUUCCCAGGAAU	-6.84	0.240591
AUAAGAAACCUGCUUCAA	UGAGGUAGUAAGUUGUAUUGUU	-9.15	0.24058
UUCCAAAAUCAUAA	UGGAAGACUAGUGAUUUUGUUGUU	-8.67	0.240366
UUCCAAAAUCAUAA	UGGAAGACUAGUGAUUUUGUUGUU	-8.67	0.240366
AAUGGGUGAAUGAUUU	AAUCGUACAGGGUCAUCCACU	-8.42	0.240228
CUUUACUUGCUUUACA	GGAGGCGGGGAGGGGGGUG	-11.47	0.240059
UUUACUCAACCGCUACUUUAGAC	UGCCAUCAGUGGUUGUGAGCG	-8.51	0.239786
UUUACUCAACCGCUACUUUAGAC	UGCCAUCAGUGGUUGUGAGCG	-8.51	0.239786
AUUUUUGUACUUGUUACU	UAAUUAAGGGUCAAAGUACACU	-7.7	0.239726
AUUUUUGUACUUGUUACU	UAAUUAAGGGUCAAAGUACACU	-7.7	0.239726
GAAGAGCAACCAAUG	UAUGGCUUUUCAUUCCUAUGUGA	-8.15	0.239424
CUGUCUUUAUUUCACCUUAUAAUU	AGAUCAGAAGGUGAUUGUGGCU	-8.7	0.239406
CACAUGCUUUUCCA	UGGAGAGAAAGGCAGUUCCUGA	-9.08	0.239325
CACAUGCUUUUCCA	UGGAGAGAAAGGCAGUUCCUGA	-9.08	0.239325
UAAACGAACAUGAAAAUU	UAAUUUUAUGUAUAAGCUAGU	-6.03	0.239001
AUUGUUUUUAUGUGUGUU	UAAGGCACGCGGUGAAUGCC	-7.28	0.238845
AUUGUUUUUAUGUGUGUU	UAAGGCACGCGGUGAAUGCC	-7.28	0.238845
CAAGCUUUGUUAAA	CGAGUUUGACAGGCUUGCUCU	-8.2	0.238789
ACACCUAUCCUUCU	CGGGGCCGGGGGUGGGGA	-10.39	0.238686
AAUGGGUGAAUGAUUU	ACCACCAUUUGAUCUAUUUUUG	-7.43	0.238523
ACAAUUGGAACUGUAACUUUG	UUUGUUUCUGAAAUCUAGUUG	-6.72	0.238213
GAAGAGCAACCAAUG	CGAGUUUGACAGGCUUGCUCU	-8.18	0.238206
UCUUUACCAACCACCACAAACCUCUAU	GUGCAGAUCUUGGUGGUAGUAGCA	-10.08	0.238073
AAAGAACUUCACAACUGCUC	UGGCAGUUGGACAUCGCCUGAGG	-9.6	0.237859
UUUGAUAAAAAUCUCUAUGA	AACGUAGAGGAAAUUCCACCU	-6.84	0.23783
CACAUGCUUUUCCA	CGGUGGACCGUAGAGCAUGCGU	-9.79	0.237795
AUAAACCUAUUGUU	AGAGGUAGUAGGUUGCAUAGU	-8.49	0.23682
AUUUUUGUACUUGUUACU	UCAAGAGCAAUAACGAAAAAUGU	-7.62	0.236572
AACACGUUUGAAAU	UUUUGUGAUGUGUUCCUAAUA	-6.85	0.235963
UUACCCACUUACUAAA	UGAGGUAGUAAGUUGUAUUGUU	-8.75	0.235439
UUACCCACUUACUAAA	UGAGGUAGUAGGUUGUAUGGUU	-8.64	0.235439
UCUUUACCAACCACCACAAACCUCUAU	CGGGGCCGGGGGUGGGGA	-10.24	0.23524
AUAAGAAACCUGCUUCAA	UGAGAUGAAGCACUGUAGCU	-7.5	0.23511
UCUUUACCAACCACCACAAACCUCUAU	UGGGGCCGGGGGUGGGGG	-10.38	0.235108
AAAUGAUUGCUCAA	UGUUGAUCAGUUGUUGCCU	-7.3	0.234953
AAAUGAUUGCUCAA	UGUUGAUCAGUUGUUGCCU	-7.3	0.234953
AUUGUUUUUAUGUGUGUU	UAGCAGCACGUAAAUAUUGGCG	-8.32	0.234697
AUUGUUUUUAUGUGUGUU	UAGCAGCACGUAAAUAUUGGCG	-8.32	0.234697
ACCAAACCAACCAUAUCCAA	UAGCAGCACAUAAUGGUUUG	-7.33	0.23456
CAAGCUUUGUUAAA	UCAGUAACAAAGAUUCAUCCUUG	-7.42	0.234439
UUGUACUAAUUAUAUGCCUUAUUUCUU	UAAGGCACGCGGUGAAUGCC	-7.14	0.234252
UUGUACUAAUUAUAUGCCUUAUUUCUU	UAAGGCACGCGGUGAAUGCC	-7.14	0.234252
AUUUUUGUACUUGUUACU	UCAGUAACAAAGAUUCAUCCUUG	-7.39	0.233491
ACUCAAUUACCCCCUGCA	AGGGUGAUGCAUCUGGAACCAGA	-9.25	0.23288
ACACCUAUCCUUCU	GUGGGGGGCCGGGGUGGGG	-10.88	0.232678
UUUAUUACCCUGACA	UUUACUCUCGGUUCCUGUCAGG	-8.95	0.232588
UGUCACUAAGAAAUCU	AGUGGCAGAGCAUUUGACU	-7.51	0.232436
AAAUGAUUGCUCAA	UCCUUCUGUGGGGCGAUCGAU	-8.71	0.232391
UAUUCUGUUAUUUACUUGUAC	AAAGAAACAGAAUUUCCGGAGG	-7.58	0.232302
GAAGAGCAACCAAUG	AAGUUGUUCGUGGUGGAUUCG	-8.09	0.232271
CACAUGCUUUUCCA	GCUGGAGGAGAUGGAGGCUC	-9.65	0.232083
AAUUUGCUGAUGAUU	ACGCUGUCAGCGGGUGCAAG	-8.03	0.232081
AAUUUGCUGAUGAUU	ACGCUGUCAGCGGGUGCAAG	-8.03	0.232081
UUACCCACUUACUAAA	UGAGGUAGUAAGUUGUAUUGUU	-8.75	0.231884
UUGUACUAAUUAUAUGCCUUAUUUCUU	UGAGGAAGUAGAUUUUAUA	-5.9	0.231827
ACAAUUGGAACUGUAACUUUG	UCAAGUGUUCUAGUUCAGACA	-7.38	0.231493
AAUAAUUAAUCUUGUACAA	ACGCUGUCAGCGGGUGCAAG	-8	0.231214
AAUAAUUAAUCUUGUACAA	ACGCUGUCAGCGGGUGCAAG	-8	0.231214
UUUAAUUUUUCACAAAUAUUAC	UUUUGUGAUGUGUUCCUAAUA	-6.71	0.23114
GCUCUCACUCAACAUGG	UGGGGCCGGGGGUGGGGG	-10.2	0.231031
AUAAGAAACCUGCUUCAA	CUGGGGAGGCGGGGAGGGGGA	-11.81	0.231025
AUAAGAAACCUGCUUCAA	CUGGGGAGGCGGGGAGGGGGA	-11.81	0.231025
UAAACGAACAUGAAAAUU	AAGUUGUUCGUGGUGGAUUCG	-8.04	0.230835
UCUUUACCAACCACCACAAACCUCUAU	UGGAAUGUAAAGAAGUAUGUAU	-9.17	0.230769
AAUCAUCAUCUAAA	AGGGUGAUGCAUCUGGAACCAGA	-9.15	0.230363
AAACUAUUUUUAGAGAUACU	UUUAAGUAAUCUGAAGGCAUU	-6.68	0.230107
ACACCUAUCCUUCU	CGGGGUGGGGGCGGGGAGGC	-11.76	0.230047
AAAUGAUUGCUCAA	CGCCAGCAGCUGGUGUGAGCAGU	-9.12	0.229839
UAAUUCUUUCACAC	CAACACUGUGCUGGAAGAUGG	-8.3	0.229726
UUAAAAAUUACAGAA	UACAGUACUGUGAUAACUGAAG	-7.08	0.229572
UUAAAAAUUACAGAA	UACAGUACUGUGAUAACUGAAG	-7.08	0.229572
AAUAAUUAAUCUUGUACAA	AUAGGUCAGGGCAUGUGCAGGA	-9.77	0.229397
UUUAAUUUUUCACAAAUAUUAC	UGUGACAGAUUGAUAACUGAAAGG	-8.35	0.229333
ACAAUUGGAACUGUAACUUUG	UUAAGACUUGCAGUGAUGUU	-6.79	0.229237
AUACAAUGUAACAC	AGCAGCAUUGUACAGGGCU	-7.72	0.22908
CUUUACUUGCUUUACA	UGAGGUAGUAAGUUGUAUUGUU	-7.64	0.228888
CUUUACUUGCUUUACA	UGAGGUAGUAAGUUGUAUUGUU	-7.64	0.228888
ACACCUAUCCUUCU	GGGGCCGGGGGUGGGGGU	-10.05	0.228877
GAAAUUAAAUUGGCAAA	UGAUUAUCACCUGUGCCAGUAGA	-8.77	0.228803
AAAUGAUUGCUCAA	UUUAAGUAAUCUGAAGGCAUU	-6.64	0.228729
CUUUACUUGCUUUACA	UGAGAUGAAGCACUGUAGCU	-7.28	0.228213
AAUUUGCUGAUGAUU	CCUGGCGCCAUCAGUGGGU	-8.37	0.228128
UUACCCACUUACUAAA	CAGGGCUGGGCUGGGUGGG	-9.96	0.227761
ACAAUUGGAACUGUAACUUUG	UUUGCAGGUUCGAUUCUGGUCA	-7.89	0.227706
CCAUACCCACAAAUUUUAC	UUGGUGCUGUUAGUGGGUGCA	-8.25	0.227649
ACAAUUGGAACUGUAACUUUG	UAGGUAGUUUCAUGUUGUUGGGA	-8.39	0.227618
UUUAUUACCCUGACA	AGAGGUAGUAGGUUGCAUAGU	-8.16	0.227615
AUAAGAAACCUGCUUCAA	CGGGGUGGGGGCGGGGAGGC	-11.61	0.227113
UAUUCUGUUAUUUACUUGUAC	UAAAGUGCUUAUAGUGCAGGUAG	-7.64	0.227111
UCUUUACCAACCACCACAAACCUCUAU	UUAAUGCUAAUCGUGAUAGGGGU	-8.42	0.227015
ACACCUAUCCUUCU	UGGGGCCGGGGGUGGGGG	-10.02	0.226954
CACAAGUCAAACAAAUUUACAAA	CGAGUUUGACAGGCUUGCUCU	-7.79	0.226849
CACAUGCUUUUCCA	UGGAAGACUAGUGAUUUUGUUGUU	-8.18	0.226781
CACAUGCUUUUCCA	UGGAAGACUAGUGAUUUUGUUGUU	-8.18	0.226781
UUACCCACUUACUAAA	GUGGGGGGCCGGGGUGGGG	-10.6	0.226689
UUUACUCAACCGCUACUUUAGAC	UCUUUGGCCCCUUGAGUGUGG	-9	0.226415
UUGUGCAAACUUUA	AGAUAUUGCACGGUUGAUCUCU	-8.14	0.226363
CACAAGUCAAACAAAUUUACAAA	UGAUAUGUUUGAUAUAUUAGGU	-5.95	0.226322
ACACCUAUCCUUCU	ACUUGGAUGGGAGACCGCC	-7.68	0.226015
ACAAUUGGAACUGUAACUUUG	UUUACUCUCGGUUCCUGUCAGG	-8.69	0.225832
UAUUCUGUUAUUUACUUGUAC	AGUGGCAGAGCAUUUGACU	-7.29	0.225627
UCUUUACCAACCACCACAAACCUCUAU	UCUGCCCCCUGGUGGUCAGUG	-8.6	0.225544
CAAGCUUUGUUAAA	AGCAGCAUUGUACAGGGCU	-7.6	0.225519
UUACCCACUUACUAAA	UUGGGCGCUGGCAGUGGGUGU	-9.47	0.225369
UUAAAAAUCUGAAUUCUUC	CAAAGAAUUCUCCUUUUGGGCU	-7.09	0.225294
CUUUACUUGCUUUACA	UAUACAAGGGCAAGCUCUCU	-7.47	0.225271
UAUUCUGUUAUUUACUUGUAC	UAAUACUGCCGGGUAAUGAUGGA	-8.58	0.225197
UAUUCUGUUAUUUACUUGUAC	AAAGUGCUUACAGUGCAGGUAG	-7.69	0.224788
AAAGAACUUCACAACUGCUC	UAGGUAGUUUCAUGUUGUUGGGA	-8.27	0.224362
CACAUGCUUUUCCA	AGGGGGAGGCGGGGAGGGGG	-11.59	0.224221
CAAGCUUUGUUAAA	UUAUAAAGCAAUGAGACUGAUU	-6.78	0.224132
AAUAAUUAAUCUUGUACAA	AGCAGCAUUGUACAGGGCUAUGA	-8.88	0.224073
AAUAAUUAAUCUUGUACAA	AGCAGCAUUGUACAGGGCUAUGA	-8.88	0.224073
UAACCUUAACUUGC	UGUUGAGGGUGAGCAAAAGUCA	-8.33	0.223925
AAUUUGCUGAUGAUU	UACGUCAUCGUUGUCAUCAUCA	-7.69	0.223677
UAAAAUGAAUUAUC	GGUGGUUCAGUGGUAGAA	-7.18	0.223606
UUUAUUACCCUGACA	CAGGGUACGAACGAUCUGGAGCU	-9.58	0.223571
CCAAUGGAAAAACUCAA	AAUGUCAGGCCAUUGGGCU	-6.38	0.223311
UUUACUCAACCGCUACUUUAGAC	CAGGGCUGGGCUGGGUGGG	-9.75	0.222959
UCUUGAAACUGCUCAA	UGAAGUGCGCCUUCCUGAGUAGA	-8.75	0.22293
UAUUCUGUUAUUUACUUGUAC	UAAUUUUAUGUAUAAGCUAGU	-5.62	0.222751
GCUCUCACUCAACAUGG	UCUUUGGCCCCUUGAGUGUGG	-8.85	0.222642
AAACUAUUUUUAGAGAUACU	AUUUAAGUAAUCUGAAGGCAUU	-6.68	0.222444
CUUUACUUGCUUUACA	AGGGGGAGGCGGGGAGGGGG	-11.49	0.222287
AAUGGGUGAAUGAUUU	CGGCCCCAUUUGCCCCUCAGGA	-9.38	0.222275
AAUGGGUGAAUGAUUU	CGGCCCCAUUUGCCCCUCAGGA	-9.38	0.222275
CUGUCUUUAUUUCACCUUAUAAUU	UGGAGUGUGACAAUGGUGUUU	-7.7	0.222158
CUUUACUUGCUUUACA	UGAGGUAGUAGGUUGUAUGGUU	-7.44	0.221928
AAAUGAUUGCUCAA	UUCCACCCUGUCUUUGAGCA	-7.71	0.221871
ACAAUUGGAACUGUAACUUUG	CCAAACCAGUUGUGCCUGUAGC	-8.33	0.221838
GAGAAUUUGACUAAAG	CCAAAUUCACGCAAGAUUUG	-5.92	0.221806
GAGAAUUUGACUAAAG	CCAAAUUCACGCAAGAUUUG	-5.92	0.221806
GAGAAUUUGACUAAAG	CCAAAUUCACGCAAGAUUUG	-5.92	0.221806
AUUUUUGUACUUGUUACU	AGCAGCAUUGUACAGGGCU	-7.47	0.221662
UUAGAUAUAUGAAUUCA	UAAUUUUAUGUAUAAGCUAGU	-5.59	0.221562
UUUAAUUUUUCACAAAUAUUAC	UAUAUUCUGCUGUUUUGUGAGA	-6.93	0.221264
UUUAAUUUUUCACAAAUAUUAC	UAUAUUCUGCUGUUUUGUGAGA	-6.93	0.221264
GAAAUGAACGAAAUGU	UUACAGUUGUUCAACCAGUUACU	-7.53	0.221145
AUUUUUGUACUUGUUACU	UGGCAAGUAGGUGAUAGGAUGU	-8.75	0.221015
CUGUCUUUAUUUCACCUUAUAAUU	CAGGCUAGGGGAGAUGACCGGAU	-9.96	0.22099
AAAUGAUUGCUCAA	AUUUAAGUAAUCUGAAGGCAUU	-6.63	0.220779
GAAAUUAAAUUGGCAAA	UUAGACCAUUGUCAAUUGAGAUG	-7.12	0.220502
UUUAUUACCCUGACA	ACCACAGGGUAGAACCACGGACA	-8.98	0.220422
UUUACUCAACCGCUACUUUAGAC	UGAAUGGCACUUUCUGAGUAGU	-7.79	0.220368
AUUGUUUUUAUGUGUGUU	UAUAUAUAUAUAUGUACGUAUG	-5.5	0.220264
CUGUCUUUAUUUCACCUUAUAAUU	GAGAGAUCAGAGGCGCAGAGU	-9.21	0.22023
UCUUGAAACUGCUCAA	UAUACCUCAGUUUUAACAGGUG	-6.29	0.220161
AUAAGAAACCUGCUUCAA	CCGGGGGAGGCGGGGAGGGGU	-10.98	0.220128
UCUUUACCAACCACCACAAACCUCUAU	GGGGCCGGGGGUGGGGGU	-9.66	0.219995
UCUUGUCUGUUAAUC	CUUGACCAAAGAAUAGACCU	-6.72	0.219967
ACAAUUGGAACUGUAACUUUG	UAUACCUCAGUUUUAACAGGUG	-6.28	0.219811
UCUUUACCAACCACCACAAACCUCUAU	UGCCAUCAGUGGUUGUGAGCG	-7.8	0.21978
UCUUUACCAACCACCACAAACCUCUAU	UGCCAUCAGUGGUUGUGAGCG	-7.8	0.21978
UUGUGCAAACUUUA	UCUCUAGUUCUUGCACGCUCU	-8.17	0.219683
UUUACUCAACCGCUACUUUAGAC	GGGGCCGGGGGUGGGGGU	-9.64	0.21954
UAAACGAACAUGAAAAUU	UUUUGCAAUAUGUUCCUGAAU	-6.34	0.219377
AUUUUUGUACUUGUUACU	AUAGGUCAGGGCAUGUGCAGGA	-9.33	0.219066
CUUUACUUGCUUUACA	AGGUGGAGGCGGGGAGGGGGG	-11.5	0.219048
GAAAUUAAAUUGGCAAA	AUCACAUUGCCAGGGAUUACC	-7.99	0.218844
AAUUUGCUGAUGAUU	UCAGUAACAAAGAUUCAUCCUUG	-6.92	0.218641
UUUAUUACCCUGACA	UGAGGUAGUAGGUUGUAUGGUU	-8.04	0.21849
UUUAUUACCCUGACA	UGAGGUAGUAGGUUGUAUAGU	-8	0.21849
UCUUUACCAACCACCACAAACCUCUAU	AUAAGACGAACAAAAGGUUUG	-5.95	0.218349
GAGAAUUUGACUAAAG	UAAUUAAGGGUCAAAGUACACU	-7.01	0.218244
GAGAAUUUGACUAAAG	UAAUUAAGGGUCAAAGUACACU	-7.01	0.218244
CUGUCUUUAUUUCACCUUAUAAUU	UGGCAAGUAGGUGAUAGGAUGU	-8.64	0.218237
AUUGUUUUUAUGUGUGUU	AAUAAUACAUGGUUGAUCUU	-5.69	0.218091
UUACCCACUUACUAAA	CGGGGCCGGGGGUGGGGA	-9.49	0.218011
UUUAUUACCCUGACA	AAUGUCAGGCCAUUGGGCU	-6.22	0.217711
AAUGGGUGAAUGAUUU	UUGAUCAGUCGUUGCCUCUCUCU	-8.82	0.217509
AAUGGGUGAAUGAUUU	UUGAUCAGUCGUUGCCUCUCUCU	-8.82	0.217509
AAUGGGUGAAUGAUUU	UUGAUCAGUCGUUGCCUCUCUCU	-8.82	0.217509
CUUUACUUGCUUUACA	UCAAGAGCAAUAACGAAAAAUGU	-7	0.217324
AAUUUGCUGAUGAUU	AAAGUGCCAUCUGUCAGCUGA	-7.82	0.217162
UUGUGCAAACUUUA	AGAGGUAGUAGGUUGCAUAGU	-7.78	0.217015
UUGUACUAAUUAUAUGCCUUAUUUCUU	UAAAGUGCUUAUAGUGCAGGUAG	-7.3	0.217004
UUAAAAAUUACAGAA	UUUUGUGAUGUGUUCCUAAUA	-6.29	0.216672
AUACAAUGUAACAC	UGAGGUAGUAGGUUGUAUGGUU	-7.19	0.216628
UUACCCACUUACUAAA	CGGGGUGGGGGCGGGGAGGC	-11.07	0.216549
UUAAAAAUCUGAAUUCUUC	UCAAGUGUUCUAGUUCAGACA	-6.9	0.216437
UUGUACUAAUUAUAUGCCUUAUUUCUU	UGAGGGGUGAUUAGGGCCAGC	-9.07	0.216416
UUGUACUAAUUAUAUGCCUUAUUUCUU	UGAGGGGUGAUUAGGGCCAGC	-9.07	0.216416
UUGUACUAAUUAUAUGCCUUAUUUCUU	UGAGGGGUGAUUAGGGCCAGC	-9.07	0.216416
AAUGGGUGAAUGAUUU	AGUAGUUAUUCUGCCUGCCAGU	-7.57	0.2161
CACAAGUCAAACAAAUUUACAAA	UGAGGAAGUAGAUUUUAUA	-5.49	0.215717
ACCAAACCAACCAUAUCCAA	UAUGUAAUAUGGUCCACGUCU	-7.08	0.215591
AAUCAUCAUCUAAA	UGGCAAGUAGGUGAUAGGAUGU	-8.52	0.215206
CUGUCUUUAUUUCACCUUAUAAUU	CGGGGGGUGGCGGGGAGGU	-10.05	0.215203
UAAUUCUUUCACAC	UGUGUGGAACCAGAUGAAACU	-7.43	0.215113
UCUUGUCUGUUAAUC	UGUGACAGAUUGAUAACUGAAAGG	-7.83	0.215051
GAGAAUUUGACUAAAG	UUCACAGUGGCUAAGUUCUG	-7.13	0.215018
AUACAAUGUAACAC	UGAGGUAGUAAGUUGUAUUGUU	-7.09	0.214972
UUACAAACAAUUUGAUACUU	UGAGGUAGUAGGUUGUAUAGU	-8.83	0.214744
ACACCUAUCCUUCU	AGCAAGGAUGUCAAACUCG	-6.71	0.214377
UUGUGCAAACUUUA	AGCAGCAUUGUACAGGGCU	-7.22	0.214243
AAUUUGCUGAUGAUU	UCGGCACCAUCAGCGGGUGUGA	-7.97	0.21419
UAAACAUAUAACUUCUA	UGAGGUAGUAGGUUGUAUAGU	-8.3	0.213913
UUACCCACUUACUAAA	CCUGGCGCCAUCAGUGGGU	-7.83	0.21341
UUGUACUAAUUAUAUGCCUUAUUUCUU	UCCGUGCACCAGGCCUAUAGUU	-8.59	0.213363
CUGUCUUUAUUUCACCUUAUAAUU	AGGGUGAUGCAUCUGGAACCAGA	-8.47	0.213243
CACAUGCUUUUCCA	CCGGGGGAGGCGGGGAGG	-8.87	0.21317
AUAAACCUAUUGUU	AGCCAGCAGUAGGACAUCCCCC	-9.3	0.213156
UUGUACUAAUUAUAUGCCUUAUUUCUU	UGGAAUGUAAAGAAGUAUGUAU	-7.02	0.212653
AAAUGAUUGCUCAA	CGGCAGUCAGACAUCCCUCUCG	-9.2	0.212569
CUUUACUUGCUUUACA	UGCUGUGUGAGCAGGUGUCGGA	-8.37	0.212437
GCUCUCACUCAACAUGG	UAGGUAGUUUCCUGUUGUUGGGA	-7.41	0.212139
UCUUGUCUGUUAAUC	UGGACCACCGAUUGGCGACC	-6.69	0.212044
UCUUGUCUGUUAAUC	UAUCAGGCUUGGACAGGGGAC	-8.83	0.212005
AUACAAUGUAACAC	UGAGGUAGUAGGUUGUAUAGU	-7.15	0.211933
AUACAAUGUAACAC	UGAGGUAGUAAGUUGUAUUGUU	-7.09	0.211933
CUUUACUUGCUUUACA	GGUAGAGCAUGGGACUCUUAAUCC	-8.17	0.211658
UGUAUUAAUGCUAAC	AGCAGCAUUGUACAGGGCUAUGA	-8.38	0.211456
UGUAUUAAUGCUAAC	AGCAGCAUUGUACAGGGCUAUGA	-8.38	0.211456
AUUGUUUUUAUGUGUGUU	CUGCACGUACAUGGAUCCAUG	-7.41	0.211171
AUUUUUGUACUUGUUACU	AGAGGUAGUAGGUUGCAUAGU	-7.57	0.211158
ACUCAAUUACCCCCUGCA	UGCGGGGCUAGGGCUAACAGCA	-8.57	0.211032
UUACCCACUUACUAAA	GGGGCCGGGGGUGGGGGU	-9.25	0.210658
AUACAAUGUAACAC	UGAGGUAGUAGAUUGUAUAGU	-6.84	0.210462
AAUAAUUAAUCUUGUACAA	UGUGACAGAUUGAUAACUGAAAGG	-7.66	0.210382
UUACAAACAAUUUGAUACUU	UGUUGAUCAGUUGUUGCCU	-6.53	0.210171
UUACAAACAAUUUGAUACUU	UGUUGAUCAGUUGUUGCCU	-6.53	0.210171
GAGAAUUUGACUAAAG	ACAAGUCAGGCUCUUGGGACC	-7.94	0.209997
CUUUACUUGCUUUACA	UAAGGCACGCGGUGAAUGCC	-6.39	0.209646
CUUUACUUGCUUUACA	UAAGGCACGCGGUGAAUGCC	-6.39	0.209646
UUACAAACAAUUUGAUACUU	AUGUAUCAGACCCUGCCUCU	-7.52	0.209179
AUAAGAAACCUGCUUCAA	UGAGGGGCAGAGAGCGAGACU	-8.94	0.209172
AAAGAACUUCACAACUGCUC	UAUAUUCUGCUGUUUUGUGAGA	-6.55	0.209132
AAAGAACUUCACAACUGCUC	UAUAUUCUGCUGUUUUGUGAGA	-6.55	0.209132
UUGUACUAAUUAUAUGCCUUAUUUCUU	UAGUAGACCGUAUAGCGUACG	-6.66	0.208843
UAUUCUGUUAUUUACUUGUAC	CAAAGUGCUUACAGUGCAGGUAG	-7.68	0.208809
GAAAUUAAAUUGGCAAA	AAGCUGCCAGUUGAAGAACUGU	-6.47	0.208642
AAAUGAUUGCUCAA	UGUUGAGGGUGAGCAAAAGUCA	-7.76	0.208602
UUGUGCAAACUUUA	CUCCCACAUGCAGGGUUUGCA	-7.23	0.208598
AAUGGGUGAAUGAUUU	UAUUGCACUCGUCCCGGCCU	-8.17	0.208525
ACACCUAUCCUUCU	AGUGGGGAGGAUGUCUGGGCAGA	-9.95	0.207638
AUUUUUGUACUUGUUACU	UAAGGUGCAUCUAGUGCAGAU	-6.31	0.207361
UUUAUUACCCUGACA	UGAGGUAGUAAGUUGUAUUGUU	-8.24	0.207246
AUUGUUUUUAUGUGUGUU	CACGCUCAUGCACACACCCA	-7.72	0.207137
AAUUUGCUGAUGAUU	UGAGGAAGUAGAUUUUAUA	-5.27	0.207073
AAUUUGCUGAUGAUU	UCACAGUGAACCGGUCUCU	-7.16	0.206877
UCUUGAAACUGCUCAA	UGCUGUGUGAGCAGGUGUCGGA	-8.15	0.206853
UAACCUUAACUUGC	UGAGCUAAGUUGAUGGACAUAG	-7.2	0.206718
GAGAAUUUGACUAAAG	AGAUGUCCAGCCACAAUUCUCG	-7.87	0.206507
AAUGGGUGAAUGAUUU	UUUCCUCAUAUUCAUUCAGGAGUG	-6.71	0.206398
UCAAUUUAAACACC	CACCCAGGUGUUUGUUGGAAUC	-7.32	0.206255
UCAAUUUAAACACC	CACCCAGGUGUUUGUUGGAAUC	-7.32	0.206255
UUGUACUAAUUAUAUGCCUUAUUUCUU	AGAGGUAGUAGGUUGCAUAGU	-7.39	0.206137
UAAACAUAUAACUUCUA	UUUUGUGAUGUGUUCCUAAUA	-5.98	0.205994
UUUAUUACCCUGACA	CGGGGUGGGGGCGGGGAGGC	-10.53	0.205986
CUUUAAUUUAACCGUUU	GAAGAAAUUAAGGAAGGACU	-6.14	0.205833
AAUUUGCUGAUGAUU	CAUCAUCGUCUCAAAUGAGUCU	-6.47	0.205789
AAUUUGCUGAUGAUU	CAUCAUCGUCUCAAAUGAGUCU	-6.47	0.205789
UAUUCUGUUAUUUACUUGUAC	CAAAGUGCUCAUAGUGCAGGUAG	-7.65	0.2057
AUCCAUCAAAACCA	CCAUGCAACAUUUUGGUGGUG	-6.54	0.20566
UUUAUUACCCUGACA	UGGCAAGUAGGUGAUAGGAUGU	-8.14	0.205607
CACAUGCUUUUCCA	UCAAGAGCAAUAACGAAAAAUGU	-6.61	0.205216
AUUGUUUUUAUGUGUGUU	UAUUGCACAUUACUAAGUUG	-5.58	0.205147
GAAAUUAAAUUGGCAAA	UGGGACUGCCAGUUUCGGCCU	-7.21	0.205121
ACAACAUGUUAAAAACUGUUUA	UAUACCUCAGUUUUAACAGGUG	-5.86	0.20511
CAAGCUUUGUUAAA	AAGCAGAGAAGGGAGCGAAGCC	-8.78	0.204805
CAAGCUUUGUUAAA	AAGCAGAGAAGGGAGCGAAGCC	-8.78	0.204805
UUACCCACUUACUAAA	UGGGGCCGGGGGUGGGGG	-9.04	0.204757
UUUGAUAAAAAUCUCUAUGA	UGAGGAAGUAGAUUUUAUA	-5.21	0.204715
CACAUGCUUUUCCA	AAGCCCUUACCCCAAAAAGCAU	-6.97	0.204399
CACAUGCUUUUCCA	AAGCCCUUACCCCAAAAAGCAU	-6.97	0.204399
UCUUGAAACUGCUCAA	UUCCACCCUGUCUUUGAGCA	-7.1	0.204317
UUAAAAAUCUGAAUUCUUC	UAUGGCACUGGUAGAAUUCACU	-7.49	0.204143
UUUAUUACCCUGACA	UAGGUAGUUUCCUGUUGUUGGGA	-7.13	0.204123
AAACUAUUUUUAGAGAUACU	UCUACAGUGCACGUGUCUCCAGU	-8.6	0.204082
UAUUCUGUUAUUUACUUGUAC	CAUAAAGUAGAAAGCACUACU	-4.91	0.203904
CUUUACUUGCUUUACA	UGAGGGGCAGAGAGCGAGACU	-8.7	0.203556
UAUUCUGUUAUUUACUUGUAC	UGUGACAGAUUGAUAACUGAAAGG	-7.41	0.203516
AAUUUGCUGAUGAUU	UGAGGUAGUAGAUUGUAUAGU	-6.61	0.203385
AAACUAUUUUUAGAGAUACU	UUCCACCCUGUCUUUGAGCA	-7.06	0.203165
UUACCCACUUACUAAA	AGAGGUAGUAGGUUGCAUAGU	-7.28	0.203068
CACAAGUCAAACAAAUUUACAAA	UCCCUGAGACCCUAACUUGUGA	-8.4	0.202752
GAAGAGCAACCAAUG	UCCCCUAUUGGUCAGUGCACU	-7.74	0.2023
AAAGAACUUCACAACUGCUC	UGAAUGGCACUUUCUGAGUAGU	-7.15	0.202263
UAACCUUAACUUGC	UGAGGUAGUAAGUUGUAUUGUU	-6.41	0.202152
UAACCUUAACUUGC	UGAGGUAGUAAGUUGUAUUGUU	-6.41	0.202152
UAUUCUGUUAUUUACUUGUAC	ACGCUGUCAGCGGGUGCAAG	-6.99	0.202023
UAUUCUGUUAUUUACUUGUAC	ACGCUGUCAGCGGGUGCAAG	-6.99	0.202023
UCUUUACCAACCACCACAAACCUCUAU	CGGGGUGGGGGCGGGGAGGC	-10.32	0.201878
UUAAAAAUUACAGAA	ACAAUUCUGUGUAUCUGAUC	-6.01	0.201746
GCUCUCACUCAACAUGG	GUGGGGGGCCGGGGUGGGG	-9.43	0.201668
ACAAUUGGAACUGUAACUUUG	UGUUGAUCAGUUGUUGCCU	-6.26	0.201481
ACAAUUGGAACUGUAACUUUG	UGUUGAUCAGUUGUUGCCU	-6.26	0.201481
UUUACUCAACCGCUACUUUAGAC	GUGCAGAUCUUGGUGGUAGUAGCA	-8.53	0.201464
UUGUGCAAACUUUA	UAAUUUUAUGUAUAAGCUAGU	-5.08	0.201348
AAUUUGCUGAUGAUU	GGAUAUCAUCGUAUACUGUAAGU	-7.05	0.201256
ACACCUAUCCUUCU	AGGGGGAGGCGGGGAGGGGG	-10.4	0.201199
UUGUACUAAUUAUAUGCCUUAUUUCUU	UAUGUAAUAUGGUCCACGUCU	-6.6	0.200974
GAGAAUUUGACUAAAG	UCUUUGGUUAUCUAGCUGUAUGA	-7.11	0.200961
AAUUUGCUGAUGAUU	AAAUUAGCAACUGUUGCAGAGC	-6.24	0.200837
AUAAACCUAUUGUU	UGGCAAGUAGGUGAUAGGAUGU	-7.95	0.200808
UAUUCUGUUAUUUACUUGUAC	UGACCUAUGAAUUGACAGACAGU	-7.31	0.200769
AUACAAUGUAACAC	AGCUACAUUGUCUGCUGGGUU	-7.08	0.200623
UCUUUACCAACCACCACAAACCUCUAU	UGGUAGACUAUGGAACGUAG	-6.56	0.200305
UGUCACUAAGAAAUCU	GUGCAGAUCUUGGUGGUAGUAGCA	-8.48	0.200283
UAUUCUGUUAUUUACUUGUAC	UAGCAGCACGUAAAUAUUGGCG	-7.09	0.2
UAUUCUGUUAUUUACUUGUAC	UAGCAGCACGUAAAUAUUGGCG	-7.09	0.2
AAUGGGUGAAUGAUUU	UUCACAAGAAGGUGCCAUUCAUG	-7.34	0.199837
CUGUCUUUAUUUCACCUUAUAAUU	CAACACUGUGCUGGAAGAUGG	-7.22	0.199834
UAAUUCUUUCACAC	GAAGAAAUUAAGGAAGGACU	-5.96	0.199799
UGUAUUAAUGCUAAC	UAAGGUGCAUCUAGUGCAGAU	-6.07	0.199474
UCUUGAAACUGCUCAA	GUCCAGUUUUCCCAGGAAU	-5.67	0.199437
AACACGUUUGAAAU	AUUCCAAGAUGUGUCAUCCAUG	-6.43	0.19938
UAUUCUGUUAUUUACUUGUAC	UCAAGAGCAAUAACGAAAAAUGU	-6.42	0.199317
ACACCUAUCCUUCU	CAGGGCUGGGCUGGGUGGG	-8.71	0.199177
AAUAAUUAAUCUUGUACAA	UUGCAAGAUACUCCUCUGUCU	-6.6	0.198975
UUUACUCAACCGCUACUUUAGAC	CAUAAAGUAGAAAGCACUACU	-4.79	0.19892
UUACCCACUUACUAAA	UGAGGUAGUAGGUUGUAUAGU	-8.6	0.198718
AAUUUGCUGAUGAUU	UUAUCAGAAUCUCCAGGGGUA	-7.15	0.198666
CAAGCUUUGUUAAA	UGAGAUGAAGCACUGUAGCU	-6.33	0.198433
UAACCUUAACUUGC	GCGGGACUGGGCGAGUUGAGC	-8.44	0.198169
CACAUGCUUUUCCA	CUGGGGAGGCGGGGAGGGGGA	-10.13	0.198161
CACAUGCUUUUCCA	CUGGGGAGGCGGGGAGGGGGA	-10.13	0.198161
UGUCACUAAGAAAUCU	UGGAAGACUAGUGAUUUUGUUGUU	-7.14	0.197948
UGUCACUAAGAAAUCU	UGGAAGACUAGUGAUUUUGUUGUU	-7.14	0.197948
UUGUGCAAACUUUA	UGAGGUAGUAGAUUGUAUAGU	-6.42	0.197538
AAUUUGCUGAUGAUU	UGAUGUAGUAGAUUGAAUAGU	-6.7	0.197535
CUGUCUUUAUUUCACCUUAUAAUU	UGAGGUAGUAGGUUGUAUGGUU	-6.68	0.197535
CUUUACUUGCUUUACA	UCCUUCUGUGGGGCGAUCGAU	-7.4	0.197439
GCUCUCACUCAACAUGG	CGGGGCCGGGGGUGGGGA	-8.59	0.197335
ACACCUAUCCUUCU	GGGGCCGGGGAGGGGGCC	-7.06	0.197097
AUUUUUGUACUUGUUACU	UGAGGUAGUAAGUUGUAUUGUU	-6.28	0.197085
CAAGCUUUGUUAAA	CUCCCACAUGCAGGGUUUGCA	-6.83	0.197057
AAUAAUUAAUCUUGUACAA	AGAUAUUGCACGGUUGAUCUCU	-7.08	0.196885
AAUCAUCAUCUAAA	UUCUUCCAGAGGUGAUGGAACU	-6.28	0.196865
AAUUUGCUGAUGAUU	UCUUUGGUUAUCUAGCUGUAUGA	-6.96	0.196721
AUAAGAAACCUGCUUCAA	ACGCUGUCAGCGGGUGCAAG	-6.8	0.196532
AUAAGAAACCUGCUUCAA	ACGCUGUCAGCGGGUGCAAG	-6.8	0.196532
AACACGUUUGAAAU	UCAAGUGUUCUAGUUCAGACA	-6.26	0.196361
AAACUAUUUUUAGAGAUACU	UAGCACCAUCUGAAAUCGGUU	-6.32	0.196212
CUGUCUUUAUUUCACCUUAUAAUU	UUAUAAAACAUCAAGUGAGAUG	-4.89	0.196071
UAUUCUGUUAUUUACUUGUAC	UGAUGUAGUAGAUUGAAUAGU	-6.54	0.195994
CUGUCUUUAUUUCACCUUAUAAUU	UGGAAUGUAAAGAAGUAUGUAU	-6.5	0.195994
UAAACGAACAUGAAAAUU	AAGCACUGUUCGUGACCUGUGG	-7.12	0.19582
UUUAUUACCCUGACA	UGAGGUAGUAGUUUGUACAGUU	-6.6	0.195788
CAAGCUUUGUUAAA	UUUGAUAAGCUGACAUGGGAC	-6.95	0.195609
GAAAUGAACGAAAUGU	AAGUUGUUCGUGGUGGAUUCG	-6.81	0.195521
AUUGUUUUUAUGUGUGUU	UCAAGAGCAAUAACGAAAAAUGU	-6.28	0.194971
UUUACUCAACCGCUACUUUAGAC	UAGGUAGUUUCCUGUUGUUGGGA	-6.81	0.194961
AAUGGGUGAAUGAUUU	UUCCCUUUGUCAUCCUUUGCCU	-7.59	0.194865
AAUGGGUGAAUGAUUU	UUCCCUUUGUCAUCCUUUGCCU	-7.59	0.194865
CAAGCUUUGUUAAA	AGCAGCAUUGUACAGGGCUAUGA	-7.72	0.194802
CAAGCUUUGUUAAA	AGCAGCAUUGUACAGGGCUAUGA	-7.72	0.194802
UAUUCUGUUAUUUACUUGUAC	CGGGGGGUGGCGGGGAGGU	-9.08	0.194433
AUCCAUCAAAACCA	UUCUUCCAGAGGUGAUGGAACU	-6.2	0.194357
ACACCUAUCCUUCU	UGAGGGGUGAUUAGGGCCAGC	-8.14	0.194226
ACACCUAUCCUUCU	UGAGGGGUGAUUAGGGCCAGC	-8.14	0.194226
ACACCUAUCCUUCU	UGAGGGGUGAUUAGGGCCAGC	-8.14	0.194226
ACAAUUGGAACUGUAACUUUG	AAAUUAGCAACUGUUGCAGAGC	-6.03	0.194078
GAGAAUUUGACUAAAG	CAAAGAAUUCUCCUUUUUGGCUA	-5.96	0.19401
GAGAAUUUGACUAAAG	AAUAAUACAUGGUUGAUCUU	-5.06	0.193944
UUGUGCAAACUUUA	UACCCAUUGCAUAUCGGAGUUG	-6.83	0.193869
CACAUGCUUUUCCA	AGUGGGGAGGAUGUCUGGGCAGA	-9.29	0.193865
AAAUGAUUGCUCAA	UGAAUGGCACUUUCUGAGUAGU	-6.85	0.193777
UUACAAACAAUUUGAUACUU	UGAUGUAGUAGAUUGAAUAGU	-6.42	0.193529
UUGUGCAAACUUUA	UGAGGUAGUAGGUUGUAUAGU	-6.42	0.193529
UAAUAUUACAAACU	UAUGUAAUAUGGUCCACGUCU	-6.33	0.192753
AUACAAUGUAACAC	AGAGGUAGUAGGUUGCAUAGU	-6.91	0.192748
ACACCUAUCCUUCU	AGGUGGAGGCGGGGAGGGGGG	-10.11	0.192571
AUAAACCUAUUGUU	AAUAAUACAUGGUUGAUCUU	-5.02	0.192411
UUGUACUAAUUAUAUGCCUUAUUUCUU	AGAGGUAAAAAUUUGAUUUGACU	-5.83	0.192409
UCUUGUCUGUUAAUC	AGUGGCAGAGCAUUUGACU	-6.21	0.192201
UUUAUUACCCUGACA	UGAGGUAGUAAGUUGUAUUGUU	-8.24	0.192041
CACAAGUCAAACAAAUUUACAAA	CAGCGUGGGUUUGAACUGUGC	-7.02	0.191699
CUUUACUUGCUUUACA	UUAUAAAACAUCAAGUGAGAUG	-4.78	0.19166
AAAGAACUUCACAACUGCUC	UGGAGAGAAAGGCAGUUCCUGA	-7.26	0.191355
AAAGAACUUCACAACUGCUC	UGGAGAGAAAGGCAGUUCCUGA	-7.26	0.191355
UGUCACUAAGAAAUCU	AGGUGACGCACCCAGGAAUCGGG	-7.98	0.191275
AAUGGGUGAAUGAUUU	UUCCCGGUGCGUCACCCGAGA	-6.03	0.191246
UUUACUCAACCGCUACUUUAGAC	UGGGGCCGGGGGUGGGGG	-8.44	0.191166
ACAAUUGGAACUGUAACUUUG	UGGACCACCGAUUGGCGACC	-6.03	0.191125
AUAAGAAACCUGCUUCAA	ACAGACAGCAGGUGUGUGGGCU	-7.76	0.190804
UUAGAUAUAUGAAUUCA	GGAUAUCAUCGUAUACUGUAAGU	-6.67	0.190408
ACAAUUGGAACUGUAACUUUG	GUCCAGUUUUCCCAGGAAU	-5.41	0.190292
CUUUACUUGCUUUACA	UAAAGUGCUUAUAGUGCAGGUAG	-6.39	0.189952
CUUUACUUGCUUUACA	CUGGGGAGGCGGGGAGGGGGA	-9.71	0.189945
CUUUACUUGCUUUACA	CUGGGGAGGCGGGGAGGGGGA	-9.71	0.189945
UAAUAUUACAAACU	UGAGGUAGUAGUUUGUACAGUU	-6.39	0.189558
UCUUGAAACUGCUCAA	UGAGGUAGUAGUUUGUACAGUU	-6.39	0.189558
UCUUGAAACUGCUCAA	UAGGUAGUUUCCUGUUGUUGGGA	-6.62	0.189522
UCAAGAAAUUCAAC	UGUUGUACUUUUUUUUUGUU	-4.23	0.189516
UUUAUUACCCUGACA	UGAGGGGUGAUUAGGGCCAGC	-7.94	0.189454
UUUAUUACCCUGACA	UGAGGGGUGAUUAGGGCCAGC	-7.94	0.189454
UUUAUUACCCUGACA	UGAGGGGUGAUUAGGGCCAGC	-7.94	0.189454
AUUGUUUUUAUGUGUGUU	CACGCUCAUGCACACACCCACA	-7.72	0.189448
AUUGUUUUUAUGUGUGUU	CACGCUCAUGCACACACCCACA	-7.72	0.189448
UUUACUCAACCGCUACUUUAGAC	CCCCCUGGUGGUCAGUGCACA	-7.92	0.189293
UCUUGUCUGUUAAUC	AUGCACCUGGGCAAGGAUUC	-6.57	0.189283
GAGAAUUUGACUAAAG	UUCUCAGGUUGGUCAGUCCUGGA	-6.69	0.18909
CGAAUACCAUAAUGAAU	CACCCAGGUGUUUGUUGGAAUC	-6.71	0.189067
CGAAUACCAUAAUGAAU	CACCCAGGUGUUUGUUGGAAUC	-6.71	0.189067
UCAAUUUAAACACC	UGGAGUGUGACAAUGGUGUUU	-6.55	0.188979
UGUCACUAAGAAAUCU	UGGCAAGUAGGUGAUAGGAUGU	-7.48	0.188937
CACAUGCUUUUCCA	AAUCCUUGGAACCUAGGUGUGAG	-7.15	0.188904
UGUCACUAAGAAAUCU	UGGUGACGCACCCCAGAAUUG	-6.5	0.188679
UUUAUUACCCUGACA	GUGGGGGGCCGGGGUGGGG	-8.82	0.188623
CACAUGCUUUUCCA	UCGAGGAGCUCACAGUCUAGU	-7.16	0.18862
UAUUCUGUUAUUUACUUGUAC	UUUAAGUAAUCUGAAGGCAUU	-5.47	0.188426
ACAAUUGGAACUGUAACUUUG	UGAGGUAGUAGUUUGUACAGUU	-6.35	0.188371
AUAAACCUAUUGUU	UUGGGCGCUGGCAGUGGGUGU	-7.91	0.188244
UAUUCUGUUAUUUACUUGUAC	UUGCAGUAACAGGUGUGAACAUU	-6.55	0.188218
GAAAUUAAAUUGGCAAA	AGAGGUAAAAAUUUGAUUUGACU	-5.7	0.188119
UCUUGUCUGUUAAUC	UUCAAGUAAUCCAGGAUAGGCU	-6.68	0.187957
UCUUGUCUGUUAAUC	UUCAAGUAAUCCAGGAUAGGCU	-6.68	0.187957
AAAUGAUUGCUCAA	CACUGUGAGCAGAGCUAUCA	-6.3	0.187891
AUUUUUGUACUUGUUACU	AGUGGCAGAGCAUUUGACU	-6.07	0.187868
AUUGUUUUUAUGUGUGUU	UGGUGACGCACCCAGAACCAGA	-7.15	0.187713
AUACAAUGUAACAC	AGCAGCAUUGUACAGGGCUAUGA	-7.43	0.187484
AUACAAUGUAACAC	AGCAGCAUUGUACAGGGCUAUGA	-7.43	0.187484
GAGAAUUUGACUAAAG	CGGCAGUCAGACAUCCCUCUCG	-8.11	0.187384
UGUCACUAAGAAAUCU	UUAAGACUUGCAGUGAUGUU	-5.55	0.187373
CUUUACUUGCUUUACA	AAAGUGCUUACAGUGCAGGUAG	-6.41	0.187372
AAUUUGCUGAUGAUU	GGUGGUUCAGUGGUAGAA	-6.01	0.187169
UUUACUCAACCGCUACUUUAGAC	GAGGAUCUCAGGAGGUAGUCU	-7.2	0.187013
AAUGGGUGAAUGAUUU	UGUUGAUCAGUUGUUGCCU	-5.81	0.186997
AAUGGGUGAAUGAUUU	UGUUGAUCAGUUGUUGCCU	-5.81	0.186997
CACAAGUCAAACAAAUUUACAAA	UCCACACAACCACAUUUGACUG	-6.88	0.186804
AAAUGAUUGCUCAA	AUGCACCUGGGCAAGGAUUC	-6.48	0.18669
UAAACAUAUAACUUCUA	GAGAAGUUGGACUGCAAUGAGG	-7.28	0.186667
CUUUACUUGCUUUACA	UGUAGAAUAAGUGGGAGGCCCC	-6.85	0.186649
CAAGCUUUGUUAAA	AACUGGCCUACAAAGUCCCAGU	-5.72	0.186501
CUUUACUUGCUUUACA	CGGUGGACCGUAGAGCAUGCGU	-7.67	0.186301
UUUAAUUUUUCACAAAUAUUAC	UGAGGAAGUAGAUUUUAUA	-4.74	0.186248
UAAUUCUUUCACAC	UGCCCUUAAAGGCACGAGAGGAC	-6.62	0.186217
UUGUACUAAUUAUAUGCCUUAUUUCUU	UGGAAUGUAAAGAAGUAUGUAU	-7.02	0.186087
UUACAAACAAUUUGAUACUU	AAGUUGUUCGUGGUGGAUUCG	-6.48	0.186047
UUUAAUUUUUCACAAAUAUUAC	GAGAAGUUGGACUGCAAUGAGG	-7.25	0.185897
AUAAGAAACCUGCUUCAA	GAGGAUCUCAGGAGGUAGUCU	-7.15	0.185714
AUUUUUGUACUUGUUACU	CGGGGGGUGGCGGGGAGGU	-8.67	0.185653
AAUGGGUGAAUGAUUU	AAUUGCACGGUAUCCAUCUG	-5.87	0.185642
AAUGGGUGAAUGAUUU	CAUUGCACUUGUCUCGGUCUGA	-7.38	0.185614
CAAGCUUUGUUAAA	UAUCAGGCUUGGACAGGGGAC	-7.73	0.185594
UGUAUUAAUGCUAAC	AAUAAUACAUGGUUGAUCUU	-4.84	0.185512
UUAGAUAUAUGAAUUCA	CAGCAGCAAUUCAUGUUUUGA	-5.64	0.185283
AUUGUUUUUAUGUGUGUU	AAGCAGAGAAGGGAGCGAAGCC	-7.94	0.185211
AUUGUUUUUAUGUGUGUU	AAGCAGAGAAGGGAGCGAAGCC	-7.94	0.185211
UUGUUAAAAUUUAUUG	UAUACCUCAGUUUUAACAGGUG	-5.29	0.185159
ACAAUUGGAACUGUAACUUUG	CAAAGUGCUUACAGUGCAGGUAG	-6.8	0.184883
AAUGGGUGAAUGAUUU	UAUGGCACUGGUAGAAUUCACU	-6.78	0.184791
AAACUAUUUUUAGAGAUACU	UGAGGAAGUAGAUUUUAUA	-4.7	0.184676
UAUUCUGUUAUUUACUUGUAC	AGCAGCAUUGUACAGGGCU	-6.22	0.18457
UGUCACUAAGAAAUCU	AGGUGACACACCCCGGAAUUG	-6.21	0.184328
CUGUCUUUAUUUCACCUUAUAAUU	AGGGGGAGGCGGGGAGGGGG	-9.52	0.184175
CACAUGCUUUUCCA	UGAAACAUGGAAGCACUUACU	-6.09	0.184155
AUUUUUGUACUUGUUACU	UAUACCUCAGUUUUAACAGGUG	-5.26	0.184109
UAUUCUGUUAUUUACUUGUAC	CGAGUUUGACAGGCUUGCUCU	-6.32	0.184042
CCAAUGGAAAAACUCAA	UCCCCUAUUGGUCAGUGCACU	-7.04	0.184004
UUACAAACAAUUUGAUACUU	AGAGGUAGUAGGUUGCAUAGU	-6.58	0.183543
UAUUCUGUUAUUUACUUGUAC	AAUCGUACAGGGUCAUCCACU	-6.43	0.183452
UUUAUUACCCUGACA	GGUGGUUCAGUGGUAGAA	-5.89	0.183432
CACAUGCUUUUCCA	CCGGGGGAGGCGGGGAGGGGU	-9.14	0.18324
AUUGUUUUUAUGUGUGUU	UGAGGGGCAGAGAGCGAGACU	-7.83	0.183201
AAUUUGCUGAUGAUU	UGCCAUCAGUGGUUGUGAGCG	-6.5	0.18315
AAUUUGCUGAUGAUU	UGCCAUCAGUGGUUGUGAGCG	-6.5	0.18315
UUUAUUACCCUGACA	GGGGCCGGGGGUGGGGGU	-8.04	0.183102
AUUGUUUUUAUGUGUGUU	UUUGAUAAGCUGACAUGGGAC	-6.5	0.182944
GCUCUCACUCAACAUGG	CAGGGCUGGGCUGGGUGGG	-8	0.182941
CACAAGUCAAACAAAUUUACAAA	UUUUGUGAUGUGUUCCUAAUA	-5.31	0.182914
CACAUGCUUUUCCA	GGGGCCGGGGAGGGGGCC	-6.55	0.182859
UUAGAUAUAUGAAUUCA	AUCAUGUAUGAUACUGCAAACA	-5.6	0.182827
CAAGCUUUGUUAAA	AAAUUAGCAACUGUUGCAGAGC	-5.68	0.182813
ACACCUAUCCUUCU	GGGGGGCCGGGGAGGGGGGC	-9.18	0.182759
UUGUACUAAUUAUAUGCCUUAUUUCUU	ACGCUGUCAGCGGGUGCAAG	-6.32	0.182659
UUGUACUAAUUAUAUGCCUUAUUUCUU	ACGCUGUCAGCGGGUGCAAG	-6.32	0.182659
UUAGAUAUAUGAAUUCA	UAUGGCACUGGUAGAAUUCACU	-6.7	0.182611
CACAUGCUUUUCCA	UGAGGAAGUAGAUUUUAUA	-4.64	0.182318
UAUUCUGUUAUUUACUUGUAC	AUUUAAGUAAUCUGAAGGCAUU	-5.47	0.182151
UUUACUCAACCGCUACUUUAGAC	CCAUGCAACAUUUUGGUGGUG	-5.79	0.182075
UCAAUUUAAACACC	UGAUGUAGUAGAUUGAAUAGU	-6.49	0.182029
UUUACUCAACCGCUACUUUAGAC	UUUUGGUCCCAUGUCUAGAGCU	-6.46	0.181767
UUUACUCAACCGCUACUUUAGAC	AUCGAGGCUAGAGUCACGCUUGG	-7.48	0.181553
AUUUUUGUACUUGUUACU	CAGUGCAAUGAUAUUGUCAAAGC	-5.6	0.181406
ACACCUAUCCUUCU	UUGGGCGCUGGCAGUGGGUGU	-7.62	0.181342
UCUUGUCUGUUAAUC	AGGGGGAGGCGGGGAGGGGG	-9.37	0.181273
AAUAAUUAAUCUUGUACAA	UGAGGUAGUAGUUUGUACAGUU	-6.11	0.181252
GAGAAUUUGACUAAAG	CAAAGAAUUCUCCUUUUGGGCU	-5.69	0.180807
AAUCAUCAUCUAAA	GGUGGUUCAGUGGUAGAA	-5.8	0.180629
UAUUCUGUUAUUUACUUGUAC	UAUCAGGCUUGGACAGGGGAC	-7.52	0.180552
AUAAACCUAUUGUU	CGCAGUGCUGUCAGUGGGU	-6.51	0.180532
UCUUGUCUGUUAAUC	CGGGGGGUGGCGGGGAGGU	-8.43	0.180514
CAAGCUUUGUUAAA	AGCAAGGAUGUCAAACUCG	-5.65	0.180511
UUGUACUAAUUAUAUGCCUUAUUUCUU	UUAAUGCUAAUCGUGAUAGGGGU	-6.69	0.180372
AAUGGGUGAAUGAUUU	CACGCUCAUGCACACACCCA	-6.72	0.180306
UCUUGAAACUGCUCAA	AAGGGCUGUUUUGGUACCGGAAA	-6.87	0.180268
UCUUUACCAACCACCACAAACCUCUAU	CAGCGUGGGUUUGAACUGUGC	-6.6	0.180229
AAUCAUCAUCUAAA	UGCACCCACUGAUGGUACUG	-5.68	0.180089
UUACAAACAAUUUGAUACUU	UGCUGUGUGAGCAGGUGUCGGA	-7.08	0.179695
CUGUCUUUAUUUCACCUUAUAAUU	UGAGGGGCAGAGAGCGAGACU	-7.68	0.179691
ACUCAAUUACCCCCUGCA	UUAGACCAUUGUCAAUUGAGAUG	-5.8	0.179622
AAAGAACUUCACAACUGCUC	AGCUGGUGUUGUGAAUCAGGCCG	-7.1	0.179565
ACAAUUGGAACUGUAACUUUG	AGAGGUAGUAGGUUGCAUAGU	-6.42	0.179079
UUAAAAAUCUGAAUUCUUC	GGUGGUUCAGUGGUAGAA	-5.75	0.179072
UUACCCACUUACUAAA	CAUGGCGCCAUCAGUGGGUGC	-6.5	0.178965
UUACAAACAAUUUGAUACUU	UGAGGUAGUAGUUUGUACAGUU	-6.03	0.178879
AAAGAACUUCACAACUGCUC	UCUCUAGUUCUUGCACGCUCU	-6.65	0.178812
AAUUUGCUGAUGAUU	UAGCACCAUUUGAAAUCAGUG	-5.57	0.178697
AAUUUGCUGAUGAUU	UAGCACCAUUUGAAAUCAGUG	-5.57	0.178697
UUGUACUAAUUAUAUGCCUUAUUUCUU	UGGGGCCGGGGGUGGGGG	-7.88	0.178482
ACACCUAUCCUUCU	AAGCAGAGAAGGGAGCGAAGCC	-7.65	0.178446
ACACCUAUCCUUCU	AAGCAGAGAAGGGAGCGAAGCC	-7.65	0.178446
CUUUACUUGCUUUACA	UGAGGUAGUAGGUUGUAUAGU	-7.38	0.178419
AUAAGAAACCUGCUUCAA	CAGCGUGGGUUUGAACUGUGC	-6.53	0.178318
AUCCAUCAAAACCA	AAGGGCUGUUUUGGUACCGGAAA	-6.79	0.178168
UAAACGAACAUGAAAAUU	UUUUGUGAUGUGUUCCUAAUA	-5.17	0.178092
AAUCAUCAUCUAAA	AGAUCAGAAGGUGAUUGUGGCU	-6.47	0.178041
AUUUUUGUACUUGUUACU	UUAAUGCUAAUCGUGAUAGGGGU	-6.6	0.177946
UUGUGCAAACUUUA	AGCAGCAUUGUACAGGGCUAUGA	-7.05	0.177896
UUGUGCAAACUUUA	AGCAGCAUUGUACAGGGCUAUGA	-7.05	0.177896
AUUUUUGUACUUGUUACU	UGAGGUAGUAGGUUGUAUGGUU	-6.18	0.177873
UAAACAUAUAACUUCUA	UUUUGCAAUAUGUUCCUGAAU	-5.14	0.177855
UUGUACUAAUUAUAUGCCUUAUUUCUU	CGGGGCCGGGGGUGGGGA	-7.74	0.177808
ACUCAAUUACCCCCUGCA	UCCUUCUGUGGGGCGAUCGAU	-6.66	0.177695
AAUUUGCUGAUGAUU	UGAGGUAGUAAGUUGUAUUGUU	-6.36	0.177681
AAAGAACUUCACAACUGCUC	UAGGUAGUUUCCUGUUGUUGGGA	-6.2	0.177498
UAACCUUAACUUGC	UGAGGUAGUAGGUUGUAUAGU	-6.28	0.177391
AUUGUUUUUAUGUGUGUU	UCUACAGUGCACGUGUCUCCAGU	-7.46	0.177029
UAAUAUUACAAACU	UUAAGACUUGCAGUGAUGUU	-5.24	0.176907
UAAACAUAUAACUUCUA	UAUAUAUAUAUAUGUACGUAUG	-4.41	0.176612
AUAAGAAACCUGCUUCAA	GGGGCCGGGGGUGGGGGU	-7.75	0.176497
UAAACGAACAUGAAAAUU	CACCCAGGUGUUUGUUGGAAUC	-6.26	0.176388
UAAACGAACAUGAAAAUU	CACCCAGGUGUUUGUUGGAAUC	-6.26	0.176388
UGUCACUAAGAAAUCU	AGGUGACACACCCCGGAAUCG	-6.2	0.176387
UUUAUUACCCUGACA	UAGGUAGUUUCAUGUUGUUGGGA	-6.5	0.176343
UCUUGUCUGUUAAUC	UAUACAAGGGCAAGCUCUCU	-5.84	0.176116
ACCAAACCAACCAUAUCCAA	UUCUCAGGUUGGUCAGUCCUGGA	-6.23	0.176088
UGUCACUAAGAAAUCU	UGAGGAAGUAGAUUUUAUA	-4.48	0.176031
AUUGUUUUUAUGUGUGUU	UUUAAGUAAUCUGAAGGCAUU	-5.11	0.176025
CUGUCUUUAUUUCACCUUAUAAUU	GGAGGCGGGGAGGGGGGUG	-8.41	0.176015
UAUUGAAUAUCCUAUAA	GGGAUGUCCGACUGCUGGCU	-7.06	0.175797
AAUUUGCUGAUGAUU	UGAGGUAGUAGGUUGUAUGGUU	-6.16	0.175555
AAACUAUUUUUAGAGAUACU	AAUUACAGAUCGUCUAAGAGGA	-5.83	0.175338
UCUUUACCAACCACCACAAACCUCUAU	GCUGGAGGAGAUGGAGGCUC	-7.29	0.175325
AAAGAACUUCACAACUGCUC	ACUGCAGACUCGUCCUGUGAGG	-6.9	0.175038
UUUAAUUUUUCACAAAUAUUAC	CACCCAGGUGUUUGUUGGAAUC	-6.21	0.174979
UUUAAUUUUUCACAAAUAUUAC	CACCCAGGUGUUUGUUGGAAUC	-6.21	0.174979
AUUUUUGUACUUGUUACU	UGAGGUAGUAGGUUGUAUAGU	-6.13	0.174892
ACAACAUGUUAAAAACUGUUUA	AGGCAGUGUAGUUAGCUGAUU	-5.72	0.17487
AUUGUUUUUAUGUGUGUU	UAGCAGCACAUCAUGGUUUACA	-6.31	0.174841
UUAAAAAGUUGAAGAA	UGUUGUACUUUUUUUUUGUU	-3.9	0.174731
CACAUGCUUUUCCA	UGAGGGGCAGAGAGCGAGACU	-7.46	0.174544
AUUGUUUUUAUGUGUGUU	ACAACCCUGUCACAUACACCUG	-6.96	0.174524
CUUUACUUGCUUUACA	CAAAGUGCUUACAGUGCAGGUAG	-6.4	0.174008
AAUUUGCUGAUGAUU	UGAGGUAGUAGGUUGUAUAGU	-6.12	0.173899
UUAAAAAGUUGAAGAA	UUUGGUCCCCUUCAACCAGCU	-5.5	0.173886
AUUUUUGUACUUGUUACU	AGCAGCAUUGUACAGGGCUAUGA	-6.89	0.173858
AUUUUUGUACUUGUUACU	AGCAGCAUUGUACAGGGCUAUGA	-6.89	0.173858
UAUUCUGUUAUUUACUUGUAC	UGAGGUAGUAGAUUGUAUAGU	-5.65	0.173846
UUUUACAAUUAAUUG	UGAGGUAGUAGAUUGUAUAGU	-5.65	0.173846
UCUUGAAACUGCUCAA	GGUGGUUCAGUGGUAGAA	-5.58	0.173778
AUUUUUGUACUUGUUACU	UGGAGUGUGACAAUGGUGUUU	-6.02	0.173687
UCUUGUCUGUUAAUC	ACCACAGGGUAGAACCACGGACA	-7.07	0.17354
AUUGUUUUUAUGUGUGUU	AGGUGACACACCCCGGAAUUG	-5.84	0.173345
GCUCUCACUCAACAUGG	UGGGUGACGCACCUUGGAAUCGGG	-7.42	0.173203
UUAGAUAUAUGAAUUCA	UGUAUGUCAACUGAUCCACAGU	-5.69	0.173159
GAAGAGCAACCAAUG	UGCCAUCAGUGGUUGUGAGCG	-6.14	0.173006
GAAGAGCAACCAAUG	UGCCAUCAGUGGUUGUGAGCG	-6.14	0.173006
UCUUGUCUGUUAAUC	GGGGGCGGGCGGGGCCGGAG	-7.9	0.17298
AUAAGAAACCUGCUUCAA	UGUUGUACUUUUUUUUUGUU	-3.86	0.172939
CUGUCUUUAUUUCACCUUAUAAUU	AGAGGUAAAAAUUUGAUUUGACU	-5.24	0.172937
AUAAACCUAUUGUU	CAGCGUGGGUUUGAACUGUGC	-6.33	0.172856
UAUUCUGUUAUUUACUUGUAC	UUAUAAAACAUCAAGUGAGAUG	-4.31	0.172815
ACAACAUGUUAAAAACUGUUUA	UUUGAUAAGCUGACAUGGGAC	-6.14	0.172812
AUUUUUGUACUUGUUACU	UAAUUUUAUGUAUAAGCUAGU	-4.36	0.17281
UUUAUUACCCUGACA	CGGGGGGUGGCGGGGAGGU	-8.07	0.172805
UAAACAUAUAACUUCUA	UGAUAUGUUUGAUAUAUUAGGU	-4.54	0.172689
UCUUGUCUGUUAAUC	GGAGGCGGGGAGGGGGGUG	-8.25	0.172666
UUGUACUAAUUAUAUGCCUUAUUUCUU	CAGUGCAAUGAUAUUGUCAAAGC	-5.33	0.17266
CUUUACUUGCUUUACA	AUGCACCUGGGCAAGGAUUC	-5.99	0.172573
CACAUGCUUUUCCA	CGGGGUGGGGGCGGGGAGGC	-8.82	0.172535
AUAAGAAACCUGCUUCAA	CGGGGCCGGGGGUGGGGA	-7.51	0.172525
CUGUCUUUAUUUCACCUUAUAAUU	GGGGCCGGGGGUGGGGGU	-7.56	0.17217
CUGUCUUUAUUUCACCUUAUAAUU	UGGGGCCGGGGGUGGGGG	-7.6	0.17214
UUGUACUAAUUAUAUGCCUUAUUUCUU	CAAAGUGCUCAUAGUGCAGGUAG	-6.4	0.172089
CCAUACCCACAAAUUUUAC	UCGGCACCAUCAGCGGGUGUGA	-6.4	0.171997
AAACUAUUUUUAGAGAUACU	UGAAUGGCACUUUCUGAGUAGU	-6.08	0.171994
AUUUUUGUACUUGUUACU	UGGAAUGUAAAGAAGUAUGUAU	-6.2	0.171957
AUUUUUGUACUUGUUACU	UGGAAUGUAAAGAAGUAUGUAU	-6.2	0.171957
UUGUACUAAUUAUAUGCCUUAUUUCUU	GGGGCCGGGGGUGGGGGU	-7.55	0.171943
CUUUACUUGCUUUACA	CAAAGUGCUCAUAGUGCAGGUAG	-6.39	0.17182
CUUUACUUGCUUUACA	UGAGGUAGUAGUUUGUACAGUU	-5.79	0.171759
AUAAACCUAUUGUU	UUUGGCAAUGGUAGAACUCACA	-6.14	0.171556
AUUGUUUUUAUGUGUGUU	AGGUGACGCACCCUGGAAUCA	-5.94	0.171528
UCUUGUCUGUUAAUC	UGGCAAGUAGGUGAUAGGAUGU	-6.79	0.171508
CUUUACUUGCUUUACA	UGGGGCCGGGGGUGGGGG	-7.57	0.171461
UAUUCUGUUAUUUACUUGUAC	UGAAUGGCACUUUCUGAGUAGU	-6.06	0.171429
AUUUUUGUACUUGUUACU	UGUAGAAUAAGUGGGAGGCCCC	-6.29	0.17139
AAUUUGCUGAUGAUU	AAUUACAGAUCGUCUAAGAGGA	-5.69	0.171128
ACCAAACCAACCAUAUCCAA	UGCCAUCAGUGGUUGUGAGCG	-6.07	0.171034
ACCAAACCAACCAUAUCCAA	UGCCAUCAGUGGUUGUGAGCG	-6.07	0.171034
UCUUUACCAACCACCACAAACCUCUAU	UUCUCAGGUUGGUCAGUCCUGGA	-6.05	0.171001
ACAAUUGGAACUGUAACUUUG	UUCACAGUGGCUAAGUUCUG	-5.66	0.170688
GAAAUUAAAUUGGCAAA	GUCCAGUUUUCCCAGGAAU	-4.85	0.170594
AUAAGAAACCUGCUUCAA	GUGGGGGGCCGGGGUGGGG	-7.97	0.170445
CACAUGCUUUUCCA	CGGGGGGUGGCGGGGAGGU	-7.95	0.170236
ACUCAAUUACCCCCUGCA	UAGGUAGUUUCCUGUUGUUGGGA	-5.94	0.170054
UUACAAACAAUUUGAUACUU	UGUGACAGAUUGAUAACUGAAAGG	-6.19	0.170008
AAUUUGCUGAUGAUU	UGGCAAGUAGGUGAUAGGAUGU	-6.73	0.169992
AUUUUUGUACUUGUUACU	UGAGGUAGUAGUUUGUACAGUU	-5.73	0.169979
CUUUAAUUUAACCGUUU	UAGCAGCACAUAAUGGUUUG	-5.31	0.16992
AUAAGAAACCUGCUUCAA	UGGGGCCGGGGGUGGGGG	-7.5	0.169875
CUGUCUUUAUUUCACCUUAUAAUU	UGGAAUGUAAAGAAGUAUGUAU	-6.5	0.169872
AUUGUUUUUAUGUGUGUU	AUUUAAGUAAUCUGAAGGCAUU	-5.1	0.16983
UAAUUCUUUCACAC	UUGCAGUAACAGGUGUGAACAUU	-5.91	0.169828
UUUAUUACCCUGACA	UGGGGCCGGGGGUGGGGG	-7.49	0.169649
CACAAGUCAAACAAAUUUACAAA	UGAGGUAGUAGAUUGUAUAGU	-5.51	0.169538
UAAUUCUUUCACAC	AGUGGGGAGGAUGUCUGGGCAGA	-8.11	0.16924
UCUUGAAACUGCUCAA	AGUGGGGAGGAUGUCUGGGCAGA	-8.11	0.16924
AAUAAUUAAUCUUGUACAA	UAAAGUGCUUAUAGUGCAGGUAG	-5.69	0.169144
UAAACGAACAUGAAAAUU	CAAAGUGCUGUUCGUGCAGGU	-5.66	0.169107
CUGUCUUUAUUUCACCUUAUAAUU	CGGGGCCGGGGGUGGGGA	-7.36	0.169079
AAUUUGCUGAUGAUU	CAUGGCGCCAUCAGUGGGUGC	-6.14	0.169053
ACUCAAUUACCCCCUGCA	AAUAAUACAUGGUUGAUCUU	-4.41	0.16903
GAGAAUUUGACUAAAG	UGAGGAAGUAGAUUUUAUA	-4.3	0.168959
UUUAUUACCCUGACA	CGGGGCCGGGGGUGGGGA	-7.35	0.168849
UCUUUACCAACCACCACAAACCUCUAU	GGUAGAGCAUGGGACUCUUAAUCC	-6.51	0.168653
GAGAAUUUGACUAAAG	AUCUCAGGUUCGUCAGCCCAUG	-6.46	0.168361
AAUUUGCUGAUGAUU	ACAGUAGUCUGCACAUUGGUU	-5.42	0.168218
AAUUUGCUGAUGAUU	ACAGUAGUCUGCACAUUGGUU	-5.42	0.168218
GAAGAGCAACCAAUG	ACCUGUAGCCCUGCUUGCUUUA	-6.38	0.167983
UAUUCUGUUAUUUACUUGUAC	AGAGGUAGUAGGUUGCAUAGU	-6.02	0.167922
AUUUUUGUACUUGUUACU	UGUAACAGCAACUCCAUGUGGA	-5.94	0.167891
AUUUUUGUACUUGUUACU	UGUAACAGCAACUCCAUGUGGA	-5.94	0.167891
AUUGUUUUUAUGUGUGUU	UAUACAAGGGCAAGCUCUCU	-5.56	0.167672
AAUCAUCAUCUAAA	ACUUGCAUCAGCUGAUGGUG	-5.18	0.167638
UUUUACAAUUAAUUG	UGAGGUAGUAGGUUGUAUGGUU	-5.19	0.167605
ACAACAUGUUAAAAACUGUUUA	AUAGGUCAGGGCAUGUGCAGGA	-7.13	0.16741
UGUAUUAAUGCUAAC	CGAGGACCAUCGGUUGGCAACC	-6.42	0.167362
UGUAUUAAUGCUAAC	CGAGGACCAUCGGUUGGCAACC	-6.42	0.167362
GAGAAUUUGACUAAAG	UCCCCUAUUGGUCAGUGCACU	-6.4	0.167277
ACAAUUGGAACUGUAACUUUG	UCUCUAGUUCUUGCACGCUCU	-6.22	0.167249
UUUAUUACCCUGACA	GUGCAGAUCUUGGUGGUAGUAGCA	-7.07	0.166982
UUUGAUAAAAAUCUCUAUGA	UUAAUGCUAAUCGUGAUAGGGGU	-6.19	0.166891
UAUUGAAUAUCCUAUAA	UCCUUCUGUGGGGCGAUCGAU	-6.25	0.166756
CUGUCUUUAUUUCACCUUAUAAUU	UGAGGUAGUAGUUUGUACAGUU	-5.62	0.166716
AAUAAUUAAUCUUGUACAA	AAAGUGCUUACAGUGCAGGUAG	-5.7	0.166618
AAAUGAUUGCUCAA	UUCAAGUAAUCCAGGAUAGGCU	-5.92	0.166573
AAAUGAUUGCUCAA	UUCAAGUAAUCCAGGAUAGGCU	-5.92	0.166573
UAAACGAACAUGAAAAUU	UUUUGCGAUGUGUUCCUAAUA	-5.07	0.166502
CACAAGUCAAACAAAUUUACAAA	AGUGGCAGAGCAUUUGACU	-5.37	0.166202
GAGAAUUUGACUAAAG	UCCGGUUCUCAGGGCUCCACC	-6.87	0.166183
UCAAUUUAAACACC	UGAGGUAGUAGAUUGUAUAGU	-5.4	0.166154
CUGUCUUUAUUUCACCUUAUAAUU	UUCAAGUAAUCCAGGAUAGGCU	-5.9	0.16601
CUGUCUUUAUUUCACCUUAUAAUU	UUCAAGUAAUCCAGGAUAGGCU	-5.9	0.16601
UUUACUCAACCGCUACUUUAGAC	CAUGCCUUGAGUGUAGGACCG	-6.23	0.165912
ACACCUAUCCUUCU	GGGGGCCGGGGAGGGGGC	-7.01	0.165447
ACACCUAUCCUUCU	GGGGGCCGGGGAGGGGGC	-7.01	0.165447
CAAGCUUUGUUAAA	UGGGAAAGUGCUUUGACAUAGU	-5.93	0.165273
AAUUUGCUGAUGAUU	UGAGGUAGUAAGUUGUAUUGUU	-6.36	0.165064
AAUUUGCUGAUGAUU	CGCAGUGCUGUCAGUGGGU	-5.95	0.165003
UUCCAAAAUCAUAA	UUUUGUGAUGUGUUCCUAAUA	-4.79	0.165002
ACACCUAUCCUUCU	CCGGGGGAGGCGGGGAGGGGU	-8.23	0.164996
UAUUCUGUUAUUUACUUGUAC	AGGUGGAGGCGGGGAGGGGGG	-8.66	0.164952
AAUGGGUGAAUGAUUU	CACGCUCAUGCACACACCCACA	-6.72	0.164908
AAUGGGUGAAUGAUUU	CACGCUCAUGCACACACCCACA	-6.72	0.164908
AUUGUUUUUAUGUGUGUU	UAACACUGUCUGGUAAAGAUG	-5.07	0.164878
CACAAGUCAAACAAAUUUACAAA	UACCCUGUAGAUCCGAAUUUGU	-5.91	0.164716
AUUGUUUUUAUGUGUGUU	UGGUGACGCACCCCAGAAUUG	-5.67	0.164586
AAAUGAUUGCUCAA	UGAAGUGCGCCUUCCUGAGUAGA	-6.46	0.164586
CACAAGUCAAACAAAUUUACAAA	UGAGGUAGUAGGUUGUAUGGUU	-6.36	0.16453
AAAUGAUUGCUCAA	ACAGUAGUCUGCACAUUGGUU	-5.3	0.164494
AAAUGAUUGCUCAA	ACAGUAGUCUGCACAUUGGUU	-5.3	0.164494
AAUGGGUGAAUGAUUU	UGCUGACAUAUUUACUAGAAGG	-5.68	0.164447
CUUUACUUGCUUUACA	UUCAAGUAAUCCAGGAUAGGCU	-5.84	0.164322
CUUUACUUGCUUUACA	UUCAAGUAAUCCAGGAUAGGCU	-5.84	0.164322
AAUUUGCUGAUGAUU	UAGCUUAUCAGACUGAUGUUGA	-5.35	0.164262
CUUUACUUGCUUUACA	CCGGGGGAGGCGGGGAGGGGU	-8.19	0.164194
AUUUUUGUACUUGUUACU	CAAAGUGCUCAUAGUGCAGGUAG	-6.1	0.164023
UAUUCUGUUAUUUACUUGUAC	CAGGCUAGGGGAGAUGACCGGAU	-7.39	0.163967
UCUUGAAACUGCUCAA	UGGAGAGAAAGGCAGUUCCUGA	-6.22	0.163943
UCUUGAAACUGCUCAA	UGGAGAGAAAGGCAGUUCCUGA	-6.22	0.163943
GAAAUUAAAUUGGCAAA	UUAAUGCUAAUCGUGAUAGGGGU	-6.08	0.163926
ACACCUAUCCUUCU	UUGGUGCUGUUAGUGGGUGCA	-5.94	0.163907
AUUGUUUUUAUGUGUGUU	AGGUGACACACCCCGGAAUCG	-5.76	0.163869
UGUCACUAAGAAAUCU	CGGGGGGUGGCGGGGAGGU	-7.65	0.163812
UAUUCUGUUAUUUACUUGUAC	UAUACCUCAGUUUUAACAGGUG	-4.68	0.163808
CAAGCUUUGUUAAA	AUAAGACGAACAAAAGGUUUG	-4.46	0.16367
AAACUAUUUUUAGAGAUACU	AAGAUGAGCAGCUCUGAACC	-5.69	0.163553
UAAACAUAUAACUUCUA	UUUUGCGAUGUGUUCCUAAUA	-4.98	0.163547
UAUUCUGUUAUUUACUUGUAC	GGUGGUUCAGUGGUAGAA	-5.25	0.1635
CACAUGCUUUUCCA	UCUGGGAAGCUGACCUCUGGUU	-6.49	0.163476
AUUUUUGUACUUGUUACU	UGAGGUAGUAAGUUGUAUUGUU	-6.28	0.163188
GAAAUGAACGAAAUGU	UGUUGUACUUUUUUUUUGUU	-3.64	0.163082
AUUUUUGUACUUGUUACU	UCAGUGCACUACAGAACUUUGU	-5.72	0.162917
UAUUCUGUUAUUUACUUGUAC	UGUAACAGCAACUCCAUGUGGA	-5.76	0.162804
UAUUCUGUUAUUUACUUGUAC	UGUAACAGCAACUCCAUGUGGA	-5.76	0.162804
UAAUUCUUUCACAC	UGUAGAAUAAGUGGGAGGCCCC	-5.97	0.16267
AAUUUGCUGAUGAUU	UGGACCACCGAUUGGCGACC	-5.13	0.162599
UUGUACUAAUUAUAUGCCUUAUUUCUU	CAGUGCAAUGUUAAAAGGGCA	-5.27	0.162504
AUAAACCUAUUGUU	CCUGGCGCCAUCAGUGGGU	-5.96	0.162442
GAGAAUUUGACUAAAG	CUGGUCAAGCACCCCAGC	-5.15	0.162358
GAGAAUUUGACUAAAG	CUGGUCAAGCACCCCAGC	-5.15	0.162358
ACAAUUGGAACUGUAACUUUG	UCCUGUUCUGAGCUGCCU	-5.67	0.162325
AAUUUGCUGAUGAUU	UGUGUAAUGGUUAGCACUCUGGACU	-6.57	0.162222
UUGUACUAAUUAUAUGCCUUAUUUCUU	UAAUUUUAUGUAUAAGCUAGU	-4.09	0.162109
CAAGCUUUGUUAAA	UCGGAUCCGUCUGAGCUUGG	-5.89	0.162036
CUUUACUUGCUUUACA	GCGGGACUGGGCGAGUUGAGC	-6.9	0.16201
UAUUCUGUUAUUUACUUGUAC	AGCAGCAUUGUACAGGGCUAUGA	-6.42	0.161998
UAUUCUGUUAUUUACUUGUAC	AGCAGCAUUGUACAGGGCUAUGA	-6.42	0.161998
CUUUACUUGCUUUACA	UAACACUGUCUGGUAAAGAUG	-4.98	0.161951
UAAUUCUUUCACAC	UGGAAGACUAGUGAUUUUGUUGUU	-5.84	0.161907
UAAUUCUUUCACAC	UGGAAGACUAGUGAUUUUGUUGUU	-5.84	0.161907
UUGUACUAAUUAUAUGCCUUAUUUCUU	ACAUGGAAAUGAACUCAGAGA	-5.38	0.161902
AAACUAUUUUUAGAGAUACU	UCUCUAGUUCUUGCACGCUCU	-6.02	0.161871
UAAAAUGAAUUAUC	UCAGUAACAAAGAUUCAUCCUUG	-5.12	0.161769
ACAACAUGUUAAAAACUGUUUA	UGGGAAAGUGCUUUGACAUAGU	-5.8	0.16165
AUAAGAAACCUGCUUCAA	UUGAAGCCUAGGGCGCGGGCC	-6.31	0.161464
AUACAAUGUAACAC	UGUUGUACUUUUUUUUUGUU	-3.6	0.16129
CACAUGCUUUUCCA	UGGAGUGUGACAAUGGUGUUU	-5.59	0.161281
UAAUUCUUUCACAC	UAUAUUCUGCUGUUUUGUGAGA	-5.05	0.161239
UAAUUCUUUCACAC	UAUAUUCUGCUGUUUUGUGAGA	-5.05	0.161239
UUAAAAAUCUGAAUUCUUC	AAAGAAACAGAAUUUCCGGAGG	-5.26	0.161201
AUUGUUUUUAUGUGUGUU	UUAUAAAGCAAUGAGACUGAUU	-4.86	0.160661
UAAUUCUUUCACAC	GUGGGGGGCCGGGGUGGGG	-7.51	0.160607
CUUUACUUGCUUUACA	CGGGGUGGGGGCGGGGAGGC	-8.21	0.160603
GAAAUUAAAUUGGCAAA	ACCACCAUUUGAUCUAUUUUUG	-5	0.160514
UAACCUUAACUUGC	AGAGGUAGUAGGUUGCAUAGU	-5.75	0.160391
AAUAAUUAAUCUUGUACAA	UGAGGUAGUAGAUUGUAUAGU	-5.21	0.160308
UAAUUCUUUCACAC	UGGAGAGAAAGGCAGUUCCUGA	-6.07	0.159989
UAAUUCUUUCACAC	UGGAGAGAAAGGCAGUUCCUGA	-6.07	0.159989
AUAAGAAACCUGCUUCAA	GCCGCUGCGGUGAGCCUUGAAGCCU	-7.45	0.159871
AAUUUGCUGAUGAUU	AACAUUCAACGCUGUCGGUGAGU	-5.68	0.159551
AAUUUGCUGAUGAUU	AACAUUCAACGCUGUCGGUGAGU	-5.68	0.159551
AAACUAUUUUUAGAGAUACU	CAACACUGUGCUGGAAGAUGG	-5.76	0.159424
CUGUCUUUAUUUCACCUUAUAAUU	UAACACUGUCUGGUAAAGAUG	-4.9	0.15935
UUGUACUAAUUAUAUGCCUUAUUUCUU	CGGGGUGGGGGCGGGGAGGC	-8.14	0.159233
UGUCACUAAGAAAUCU	UGGUGACGCACCCAGAACCAGA	-6.06	0.159097
UCUUGUCUGUUAAUC	AUGCACCUGGGCAAGGAUUCUGA	-6.48	0.159057
CAAGCUUUGUUAAA	GAGAGAUCAGAGGCGCAGAGU	-6.65	0.159015
CUUUACUUGCUUUACA	UGAGGGGCAGAGAGCGAGCCC	-5.86	0.158937
UUUACUCAACCGCUACUUUAGAC	UCUGCCCCCUGGUGGUCAGUG	-6.06	0.15893
AAUUUGCUGAUGAUU	UCCCCUAUUGGUCAGUGCACU	-6.08	0.158913
UUUAAUUUUUCACAAAUAUUAC	GAAGAAAUUAAGGAAGGACU	-4.74	0.1589
AUUUUUGUACUUGUUACU	CAGUGCAAUGUUAAAAGGGCA	-5.15	0.158804
ACAACAUGUUAAAAACUGUUUA	UUUUGUGAUGUGUUCCUAAUA	-4.61	0.158801
AUAAGAAACCUGCUUCAA	GGGGGCGGGCGGGGCCGGAG	-7.25	0.158748
CUUUACUUGCUUUACA	AGAGGUAAAAAUUUGAUUUGACU	-4.81	0.158746
CACAAGUCAAACAAAUUUACAAA	UGAGGUAGUAAGUUGUAUUGUU	-5.58	0.158706
UUUAUUACCCUGACA	UGAUGUAGUAGAUUGAAUAGU	-5.37	0.158706
ACAAUUGGAACUGUAACUUUG	GGUUCCAGAGUGCAUCACCUGA	-5.52	0.158666
CACAUGCUUUUCCA	CAUAAAGUAGAAAGCACUACU	-3.82	0.158638
UAAUUCUUUCACAC	CAAAGAAUUCUCCUUUUGGGCU	-4.99	0.158564
AUAAGAAACCUGCUUCAA	UAGAUCUGGGGUAGGGCCUGGG	-6.62	0.158563
UCUUGUCUGUUAAUC	UAUACCUCAGUUUUAACAGGUG	-4.52	0.158208
CUUUACUUGCUUUACA	ACGCUGUCAGCGGGUGCAAG	-5.47	0.158092
CUUUACUUGCUUUACA	ACGCUGUCAGCGGGUGCAAG	-5.47	0.158092
UUAAAAAUUACAGAA	UGGAAGACUAGUGAUUUUGUUGUU	-5.7	0.158026
UUAAAAAUUACAGAA	UGGAAGACUAGUGAUUUUGUUGUU	-5.7	0.158026
AUUUUUGUACUUGUUACU	AAAGUGCUUACAGUGCAGGUAG	-5.4	0.157849
AAAUGAUUGCUCAA	AUGCACCUGGGCAAGGAUUCUGA	-6.43	0.15783
GAGAAUUUGACUAAAG	UUUUGGUCCCAUGUCUAGAGCU	-5.6	0.157569
AAACUAUUUUUAGAGAUACU	UAAUGCCCCUAAAAAUCCUU	-4.78	0.157548
AUUUUUGUACUUGUUACU	AGCAAGGAUGUCAAACUCG	-4.93	0.157508
ACACCUAUCCUUCU	ACCACAGGGUAGAACCACGGACA	-6.41	0.157339
CUUUAAUUUAACCGUUU	UGAUGUAGUAGAUUGAAUAGU	-5.28	0.157165
CACAAGUCAAACAAAUUUACAAA	UGAUGUAGUAGAUUGAAUAGU	-5.25	0.157165
AUUUUUGUACUUGUUACU	CCACUGCCCCAGGUGCUG	-5.61	0.157143
AUUUUUGUACUUGUUACU	UGUGACAGAUUGAUAACUGAAAGG	-5.72	0.1571
CUUUACUUGCUUUACA	UUUAAGUAAUCUGAAGGCAUU	-4.56	0.157079
GAAAUGAACGAAAUGU	UUUGUUUCUGAAAUCUAGUUG	-4.43	0.157037
UUAGAUAUAUGAAUUCA	UGAGAACUGAAUUCCAUAGGCUGU	-6.25	0.156917
UAUUGAAUAUCCUAUAA	CAUGCCUUGAGUGUAGGACCG	-5.89	0.156858
CGAAUACCAUAAUGAAU	AACAUUCAUUGUUGUCGGUGGG	-5.15	0.156726
UUGUGCAAACUUUA	CGAGUUUGACAGGCUUGCUCU	-5.38	0.156669
UUUAAUUUUUCACAAAUAUUAC	UGUGUGGAACCAGAUGAAACU	-5.41	0.15663
CUUUAAUUUAACCGUUU	UGAGGUAGUAGAUUGUAUAGU	-5.09	0.156615
UGUCACUAAGAAAUCU	AGGUGACGCACCCUGGAAUCA	-5.42	0.156512
AAAUGAUUGCUCAA	CUGAGGGGCGAUCGGGGCCGG	-6.73	0.156439
CUGUCUUUAUUUCACCUUAUAAUU	GUGGGGGGCCGGGGUGGGG	-7.3	0.156116
CCAUACCCACAAAUUUUAC	AGAGGUAAAAAUUUGAUUUGACU	-4.73	0.156106
AAAUGAUUGCUCAA	CAGCAGCAAUUCAUGUUUUGA	-4.75	0.156045
CACAUGCUUUUCCA	UGAGGGGCAGAGAGCGAGCCC	-5.75	0.155953
ACACCUAUCCUUCU	UAGAUCUGGGGUAGGGCCUGGG	-6.51	0.155928
UCUUGAAACUGCUCAA	UGGGACUGCCAGUUUCGGCCU	-5.48	0.155903
CCAUACCCACAAAUUUUAC	CAUGGCGCCAUCAGUGGGUGC	-5.66	0.155837
UCUUUACCAACCACCACAAACCUCUAU	CUCCCACAUGCAGGGUUUGCA	-5.4	0.155799
AAAUGAUUGCUCAA	CCGAAACUGGUAGUCUGACAUC	-5.89	0.155697
ACCAAACCAACCAUAUCCAA	ACUUGGAUGGGAGACCGCC	-5.29	0.15568
CUUUACUUGCUUUACA	AGAGGUAGUAGGUUGCAUAGU	-5.58	0.155649
CACAAGUCAAACAAAUUUACAAA	CAAAGAAUUCUCCUUUUUGGCUA	-4.78	0.155599
AUUUUUGUACUUGUUACU	CGAGUUUGACAGGCUUGCUCU	-5.34	0.155504
UAUUCUGUUAUUUACUUGUAC	GAGAGAUCAGAGGCGCAGAGU	-6.5	0.155428
GAGAAUUUGACUAAAG	UCUCUAGUUCUUGCACGCUCU	-5.78	0.155418
UUGUACUAAUUAUAUGCCUUAUUUCUU	UGGCAAGUAGGUGAUAGGAUGU	-6.15	0.155342
AUAAACCUAUUGUU	UUCACAGUGGCUAAGUUCUG	-5.15	0.155308
AUAAGAAACCUGCUUCAA	GCGGGCGGGCGGGGCCGGGG	-7.03	0.15529
UUAGAUAUAUGAAUUCA	UGAUAUGUUUGAUAUAUUAGGU	-4.08	0.155192
UCUUGUCUGUUAAUC	UGUGUGGAACCAGAUGAAACU	-5.36	0.155182
CACAUGCUUUUCCA	GAGAAGUUGGACUGCAAUGAGG	-6.05	0.155128
AAACUAUUUUUAGAGAUACU	UGAGGUAGUAGGUUGUAUGGUU	-5.03	0.155018
UUGUACUAAUUAUAUGCCUUAUUUCUU	UCCUUCUGUGGGGCGAUCGAU	-5.81	0.155016
AUUUUUGUACUUGUUACU	UAAAGUGCUUAUAGUGCAGGUAG	-5.21	0.154875
AUUGUUUUUAUGUGUGUU	AGAGGUAAAAAUUUGAUUUGACU	-4.69	0.154785
CAAGCUUUGUUAAA	UCUGACUGAGAGCUUAGGCCU	-5.76	0.154756
AAUUUGCUGAUGAUU	UGAUUAUCACCUGUGCCAGUAGA	-5.93	0.154709
AAUAAUUAAUCUUGUACAA	CAAAGUGCUUACAGUGCAGGUAG	-5.69	0.154704
UUACAAACAAUUUGAUACUU	CACCCAGGUGUUUGUUGGAAUC	-5.49	0.154691
UUACAAACAAUUUGAUACUU	CACCCAGGUGUUUGUUGGAAUC	-5.49	0.154691
UAAUAUUACAAACU	UACAGUACUGUGAUAACUGAAG	-4.77	0.154669
UAAUAUUACAAACU	UACAGUACUGUGAUAACUGAAG	-4.77	0.154669
UUUACUCAACCGCUACUUUAGAC	AAGGUAGAUAGAACAGGUCUUGU	-5.75	0.154653
UUACAAACAAUUUGAUACUU	AGCAAGGAUGUCAAACUCG	-4.84	0.154633
CAAGCUUUGUUAAA	UUUGGCAAUGGUAGAACUCACA	-5.53	0.154512
AAUAAUUAAUCUUGUACAA	UGUUGAUCAGUUGUUGCCU	-4.8	0.15449
AAUAAUUAAUCUUGUACAA	UGUUGAUCAGUUGUUGCCU	-4.8	0.15449
UCUUGUCUGUUAAUC	GCGGGCGGGCGGGGCCGGGG	-6.99	0.154407
CCAAUGGAAAAACUCAA	UAGGUAGUUUCAUGUUGUUGGGA	-5.69	0.154368
UAAACAUAUAACUUCUA	UGUAUGUCAACUGAUCCACAGU	-5.07	0.154291
UUAAAAAGUUGAAGAA	UUUGGUCCCCUUCAACCAGCUGU	-5.54	0.154189
UUAAAAAGUUGAAGAA	UUUGGUCCCCUUCAACCAGCUGU	-5.54	0.154189
UUUACUCAACCGCUACUUUAGAC	CGAGGACCAUCGGUUGGCAACC	-5.91	0.154067
UUUACUCAACCGCUACUUUAGAC	CGAGGACCAUCGGUUGGCAACC	-5.91	0.154067
AUUUUUGUACUUGUUACU	UGUUGAGGGUGAGCAAAAGUCA	-5.73	0.154032
UCUUGUCUGUUAAUC	UUGCAGUAACAGGUGUGAACAUU	-5.36	0.154023
UGUAUUAAUGCUAAC	AAAGGUUGGCAACCGCUGGU	-5.07	0.153916
UCUUGUCUGUUAAUC	AGGUGGAGGCGGGGAGGGGGG	-8.08	0.153905
AAAUGAUUGCUCAA	UAAUACUGCCGGGUAAUGAUGGA	-5.86	0.153806
CACAUGCUUUUCCA	CAACACUGUGCUGGAAGAUGG	-5.55	0.153612
AAACUAUUUUUAGAGAUACU	UGAGGUAGUAGAUUGUAUAGU	-4.99	0.153538
UUUACUCAACCGCUACUUUAGAC	CGGGGCCGGGGGUGGGGA	-6.68	0.153457
CACAUGCUUUUCCA	GGGGGCCGGGGAGGGGGC	-6.5	0.15341
CACAUGCUUUUCCA	GGGGGCCGGGGAGGGGGC	-6.5	0.15341
UUUGAUAAAAAUCUCUAUGA	AUCACAUUGCCAGGGAUUACC	-5.6	0.153383
AUACAAUGUAACAC	AAAUUAGCAACUGUUGCAGAGC	-4.76	0.153202
AAUUUGCUGAUGAUU	UUUGGCAAUGGUAGAACUCACA	-5.48	0.153115
UUGUACUAAUUAUAUGCCUUAUUUCUU	UAGAUCUGGGGUAGGGCCUGGG	-6.39	0.153054
AUUGUUUUUAUGUGUGUU	UGGAUGAUGCACCCCGGAAU	-5.18	0.153028
AUUUUUGUACUUGUUACU	AUAAGACGAACAAAAGGUUUG	-4.17	0.153028
UCAAUUUAAACACC	UGACCUAUGAAUUGACAGACAGU	-5.57	0.15298
CUGUCUUUAUUUCACCUUAUAAUU	UCCUUCUGUGGGGCGAUCGAU	-5.73	0.152882
CACAUGCUUUUCCA	AGGUGGAGGCGGGGAGGGGGG	-8.02	0.152762
ACUCAAUUACCCCCUGCA	UAGGUAGUUUCAUGUUGUUGGGA	-5.63	0.15274
UUAAAAAGUUGAAGAA	UCUUUGGCCCCUUGAGUGUGG	-6.07	0.152704
AAUUUGCUGAUGAUU	AGAGGUAGUAGGUUGCAUAGU	-5.47	0.15258
AAAUGAUUGCUCAA	GGCCAGCAGUCGGACAUCCCCA	-6.78	0.152497
AAUAAUUAAUCUUGUACAA	UGUGCAAAUCUAUGCAAAACUGA	-4.39	0.152431
CUUUAAUUUAACCGUUU	UGUGUAAUGGUUAGCACUCUGGACU	-6.17	0.152346
CUUUACUUGCUUUACA	CGGGGCCGGGGGUGGGGA	-6.63	0.152309
UCUUGAAACUGCUCAA	UGGCAGUUGGACAUCCCCUGAAA	-5.94	0.152308
UUGUACUAAUUAUAUGCCUUAUUUCUU	GAGAAGUUGGACUGCAAUGAGG	-5.94	0.152308
UUAGAUAUAUGAAUUCA	AAGUUGUUCGUGGUGGAUUCG	-5.3	0.152168
AAUAAUUAAUCUUGUACAA	CAAAGUGCUCAUAGUGCAGGUAG	-5.65	0.151923
AAACUAUUUUUAGAGAUACU	CUUGACCAAAGAAUAGACCU	-4.64	0.151882
ACAACAUGUUAAAAACUGUUUA	UUUUGCAAUAUGUUCCUGAAU	-4.38	0.151557
AUUGUUUUUAUGUGUGUU	AGGUGACGCACCCAGGAAUCGGG	-6.31	0.151246
CUUUACUUGCUUUACA	AUUUAAGUAAUCUGAAGGCAUU	-4.53	0.150849
AUUGUUUUUAUGUGUGUU	CGGUGGACCGUAGAGCAUGCGU	-6.21	0.150838
CAAGCUUUGUUAAA	AACUGGCCCACAAAGUCCCGCU	-6.06	0.150821
AAUUUGCUGAUGAUU	AAGUUGUUCGUGGUGGAUUCG	-5.25	0.150732
AUUGUUUUUAUGUGUGUU	UAAUGCCCCUAAAAAUCCUU	-4.57	0.150626
UUGUACUAAUUAUAUGCCUUAUUUCUU	AAUCCUUGGAACCUAGGUGUGAG	-5.7	0.150594
GAAAUGAACGAAAUGU	UGGAAGACUAGUGAUUUUGUUGUU	-5.43	0.150541
GAAAUGAACGAAAUGU	UGGAAGACUAGUGAUUUUGUUGUU	-5.43	0.150541
AUAAACCUAUUGUU	UGAGAACUGAAUUCCAUGGGUU	-5.18	0.150232
AUCCAUCAAAACCA	GUGCAGAUCUUGGUGGUAGUAGCA	-6.36	0.150213
UUUAUUACCCUGACA	AAGUUGUUCGUGGUGGAUUCG	-5.23	0.150158
UUUACUCAACCGCUACUUUAGAC	AAUUACAGAUCGUCUAAGAGGA	-4.99	0.150075
UAAACGAACAUGAAAAUU	UGAUAUGUUUGAUAUAUUAGGU	-3.94	0.149867
AAUAAUUAAUCUUGUACAA	UGUGCAAAUCCAUGCAAAACUG	-4.33	0.149827
AAUAAUUAAUCUUGUACAA	UGUGCAAAUCCAUGCAAAACUG	-4.33	0.149827
UUGUACUAAUUAUAUGCCUUAUUUCUU	CUGGGCAUGGAACGCUUGCC	-4.94	0.149788
UUUGAUAAAAAUCUCUAUGA	UUAUCAGAAUCUCCAGGGGUA	-5.39	0.149764
AAAGAACUUCACAACUGCUC	CACUAGAUUGUGAGCUCCUGGA	-5.69	0.149737
UUUAAUUUUUCACAAAUAUUAC	UCAAGAGCAAUAACGAAAAAUGU	-4.82	0.149643
CUUUACUUGCUUUACA	GUAGGGCCCAGGAAUCUGCAU	-5.49	0.149591
UAUUGAAUAUCCUAUAA	AGGAUGUCUGACUGCUGGCU	-5.66	0.149577
UCUUGUCUGUUAAUC	CUGGGGAGGCGGGGAGGGGGA	-7.64	0.149452
UCUUGUCUGUUAAUC	CUGGGGAGGCGGGGAGGGGGA	-7.64	0.149452
CUGUCUUUAUUUCACCUUAUAAUU	UGAGGUAGUAGGUUGUAUAGU	-5.63	0.149275
CACAAGUCAAACAAAUUUACAAA	UGAGGUAGUAAGUUGUAUUGUU	-5.58	0.149275
CACAUGCUUUUCCA	UCUUUGGCCCCUUGAGUGUGG	-5.93	0.149182
UUUUACAAUUAAUUG	UGAGGUAGUAAGUUGUAUUGUU	-5.1	0.149153
UUGUUAAAAUUUAUUG	UGAUGUAGUAGAUUGAAUAGU	-5.06	0.149153
UUGUGCAAACUUUA	UGAGGUAGUAGGUUGUAUGGUU	-5.06	0.149153
CACAAGUCAAACAAAUUUACAAA	UGAGGUAGUAGGUUGUAUAGU	-5.04	0.149153
CCAAUGGAAAAACUCAA	UGGAAGACUAGUGAUUUUGUUGUU	-5.37	0.148877
CCAAUGGAAAAACUCAA	UGGAAGACUAGUGAUUUUGUUGUU	-5.37	0.148877
AAUUUGCUGAUGAUU	CGAGGACCAUCGGUUGGCAACC	-5.71	0.148853
AAUUUGCUGAUGAUU	CGAGGACCAUCGGUUGGCAACC	-5.71	0.148853
GAAAUGAACGAAAUGU	UUGUUCAGCCGUUGCCUCUCUCU	-6.41	0.148793
GAAAUUAAAUUGGCAAA	CAGUGCAAUGAUAUUGUCAAAGC	-4.58	0.148364
UUAAAAAGUUGAAGAA	UGGGAAAGUGCUUUGACAUAGU	-5.32	0.148272
UUAGAUAUAUGAAUUCA	AUUCCAAGAUGUGUCAUCCAUG	-4.78	0.148217
AAUAAUUAAUCUUGUACAA	CAAAGUGCUGUUCGUGCAGGU	-4.96	0.148192
UAAUAUUACAAACU	UGAUGUAGUAGAUUGAAUAGU	-5.3	0.148116
CAAGCUUUGUUAAA	UGACCUAUGAAUUGACAGACAGU	-5.39	0.148036
ACAAUUGGAACUGUAACUUUG	GAGAAGUUGGACUGCAAUGAGG	-5.77	0.147949
UCUUGUCUGUUAAUC	CCGGGGGAGGCGGGGAGG	-6.15	0.147801
AAAUGAUUGCUCAA	GAGGAUCUCAGGAGGUAGUCU	-5.69	0.147792
CACAAGUCAAACAAAUUUACAAA	UACCCUGUAGAACCGAAUUUGU	-5.25	0.147762
AAUUUGCUGAUGAUU	CCCCCUGGUGGUCAGUGCACA	-6.18	0.147706
UAUUCUGUUAUUUACUUGUAC	CAAAGUGCUGUUCGUGCAGGU	-4.94	0.147595
ACACCUAUCCUUCU	UGUUGAGGGUGAGCAAAAGUCA	-5.49	0.147581
UUAGAUAUAUGAAUUCA	UUCCGGGGUGUAUCACCUGAGA	-4.73	0.14749
UUUGAUAAAAAUCUCUAUGA	AGUGGGGAGGAUGUCUGGGCAGA	-7.06	0.147329
ACAAUUGGAACUGUAACUUUG	UCCGGUUCUCAGGGCUCCACC	-6.09	0.147315
UGUCACUAAGAAAUCU	AGGGUGAUGCAUCUGGAACCAGA	-5.85	0.147281
UAACCUUAACUUGC	AAUGGCGCCACUAGGGUUG	-4.87	0.147219
UAUUCUGUUAUUUACUUGUAC	UUAAUGCUAAUCGUGAUAGGGGU	-5.46	0.147209
UAUUCUGUUAUUUACUUGUAC	AGAGGUAAAAAUUUGAUUUGACU	-4.46	0.147195
UUACCCACUUACUAAA	UGCUGGCAGUGAGUGUGAGUG	-5.35	0.14714
UUAAAAAUUACAGAA	UUCCUGGUCAUCUCCUCUGUAGC	-6.4	0.147059
UCAAUUUAAACACC	UGAGGUAGUAGGUUGUAUAGU	-4.9	0.147049
CUUUAAUUUAACCGUUU	UGAGGUAGUAAGUUGUAUUGUU	-4.84	0.147049
UGUCACUAAGAAAUCU	GGUGGUUCAGUGGUAGAA	-4.72	0.146995
CUUUACUUGCUUUACA	GGGGCCGGGGGUGGGGGU	-6.45	0.146891
UUAAAAAGUUGAAGAA	CAAAGAAUUCUCCUUUUUGGCUA	-4.51	0.14681
GCUCUCACUCAACAUGG	UAGCUUAUCAGACUGAUGUUGA	-4.78	0.146761
CUUUACUUGCUUUACA	CCGGGGGAGGCGGGGAGG	-6.1	0.146599
UUGUACUAAUUAUAUGCCUUAUUUCUU	AUCAUGUAUGAUACUGCAAACA	-4.49	0.146588
UGUCACUAAGAAAUCU	CCAUGCAACAUUUUGGUGGUG	-4.66	0.146541
ACACCUAUCCUUCU	CUGGGGAGGCGGGGAGGGGGA	-7.49	0.146518
ACACCUAUCCUUCU	CUGGGGAGGCGGGGAGGGGGA	-7.49	0.146518
UAUUCUGUUAUUUACUUGUAC	AUAGGUCAGGGCAUGUGCAGGA	-6.24	0.146513
UGUCACUAAGAAAUCU	UGGUGAUCAGCUGUUGCCU	-4.52	0.14642
UCUUGUCUGUUAAUC	UUAAUGCUAAUCGUGAUAGGGGU	-5.43	0.146401
ACAAUUGGAACUGUAACUUUG	UAGGUAGUUUCCUGUUGUUGGGA	-5.11	0.146293
CUUUACUUGCUUUACA	GUGGGGGGCCGGGGUGGGG	-6.84	0.146279
AUAAGAAACCUGCUUCAA	UGGAGUGUGACAAUGGUGUUU	-5.07	0.146278
AUUUUUGUACUUGUUACU	CAAAGUGCUUACAGUGCAGGUAG	-5.38	0.146275
CUUUAAUUUAACCGUUU	UGAGGGGUGAUUAGGGCCAGC	-6.13	0.146266
CUUUAAUUUAACCGUUU	UGAGGGGUGAUUAGGGCCAGC	-6.13	0.146266
CUUUAAUUUAACCGUUU	UGAGGGGUGAUUAGGGCCAGC	-6.13	0.146266
UUUUACAAUUAAUUG	UGAGGUAGUAGGUUGUAUAGU	-5.15	0.146087
AAUUUGCUGAUGAUU	AACAUUCAUUGUUGUCGGUGGG	-4.8	0.146074
CACAUGCUUUUCCA	ACAGACAGCAGGUGUGUGGGCU	-5.94	0.146054
UCUUGUCUGUUAAUC	AAGAUGAGCAGCUCUGAACC	-5.08	0.146019
CUUUACUUGCUUUACA	AUGCACCUGGGCAAGGAUUCUGA	-5.94	0.145803
CUUUACUUGCUUUACA	AAGCAGAGAAGGGAGCGAAGCC	-6.25	0.14579
CUUUACUUGCUUUACA	AAGCAGAGAAGGGAGCGAAGCC	-6.25	0.14579
UUAGAUAUAUGAAUUCA	AUGUAUCAGACCCUGCCUCU	-5.24	0.145758
UUGUGCAAACUUUA	AUAAGACGAACAAAAGGUUUG	-3.97	0.145688
AUUUUUGUACUUGUUACU	UGAGGUAGUAGAUUGUAUAGU	-4.73	0.145538
UUUAAUUUUUCACAAAUAUUAC	CACUAGAUUGUGAGCUCCUGGA	-5.53	0.145526
AAACUAUUUUUAGAGAUACU	UUCAAGUAAUCCAGGAUAGGCU	-5.17	0.14547
AAACUAUUUUUAGAGAUACU	UUCAAGUAAUCCAGGAUAGGCU	-5.17	0.14547
GAAAUUAAAUUGGCAAA	UUCCCUUUGUCAUCCUUUGCCU	-5.66	0.145315
GAAAUUAAAUUGGCAAA	UUCCCUUUGUCAUCCUUUGCCU	-5.66	0.145315
UUAAAAAUCUGAAUUCUUC	AUGCACCUGGGCAAGGAUUCUGA	-5.92	0.145312
UAACCUUAACUUGC	AAAGGUUGGCAACCGCUGGU	-4.78	0.145112
CACAUGCUUUUCCA	GGGGGGCCGGGGAGGGGGGC	-7.28	0.144933
CUUUAAUUUAACCGUUU	UAAUUAAGGGUCAAAGUACACU	-4.65	0.14477
CUUUAAUUUAACCGUUU	UAAUUAAGGGUCAAAGUACACU	-4.65	0.14477
AAUAAUUAAUCUUGUACAA	UGGCAAGUAGGUGAUAGGAUGU	-5.73	0.144734
AUUUUUGUACUUGUUACU	AAGGUAGAUAGAACAGGUCUUGU	-5.38	0.144701
UCAAUUUAAACACC	UGAGGUAGUAAGUUGUAUUGUU	-5.15	0.144638
UCUUGUCUGUUAAUC	CGGGGUGGGGGCGGGGAGGC	-7.39	0.144562
AAACUAUUUUUAGAGAUACU	UGCUGACAUAUUUACUAGAAGG	-4.99	0.14447
AAACUAUUUUUAGAGAUACU	UGAGGUAGUAAGUUGUAUUGUU	-4.84	0.144419
UUGUACUAAUUAUAUGCCUUAUUUCUU	GUAGGGCCCAGGAAUCUGCAU	-5.3	0.144414
CACAUGCUUUUCCA	UCACCCUGCAGAGAGAGGCC	-5.48	0.144248
CACAUGCUUUUCCA	UCACCCUGCAGAGAGAGGCC	-5.48	0.144248
CCAUACCCACAAAUUUUAC	UACCCUGUAGAACCGAAUUUGU	-5.12	0.144104
UAUUGAAUAUCCUAUAA	UUUCCUCAUAUUCAUUCAGGAGUG	-4.68	0.143956
AUUGUUUUUAUGUGUGUU	AACGUAGAGGAAAUUCCACCU	-4.14	0.14395
AAACUAUUUUUAGAGAUACU	AGAGGUAGUAGGUUGCAUAGU	-5.16	0.143933
ACAAUUGGAACUGUAACUUUG	AAAGUGCUUACAGUGCAGGUAG	-4.92	0.143818
GAAAUUAAAUUGGCAAA	UUCCCUUUGUCAUCCUAUGCCU	-5.67	0.143653
AAUUUGCUGAUGAUU	UAGUAGACCGUAUAGCGUACG	-4.58	0.143619
AUUGUUUUUAUGUGUGUU	CAACACUGUGCUGGAAGAUGG	-5.18	0.143371
UAAACAUAUAACUUCUA	UACCCAUUGCAUAUCGGAGUUG	-5.05	0.143344
CUGUCUUUAUUUCACCUUAUAAUU	UGAGGCUCAGUGUAAGGGAACACU	-5.45	0.14327
UUGUACUAAUUAUAUGCCUUAUUUCUU	AAAGUGCUUACAGUGCAGGUAG	-4.9	0.143233
ACAAUUGGAACUGUAACUUUG	UUGCAGUUGGACAUCCCCUGAG	-5.36	0.143124
AUAAACCUAUUGUU	UCAAGAGCAAUAACGAAAAAUGU	-4.61	0.143123
UAAUUCUUUCACAC	CUUGACCAAAGAAUAGACCU	-4.37	0.143044
UAUUCUGUUAUUUACUUGUAC	AAGCAGAGAAGGGAGCGAAGCC	-6.13	0.14299
UAUUCUGUUAUUUACUUGUAC	AAGCAGAGAAGGGAGCGAAGCC	-6.13	0.14299
ACAACAUGUUAAAAACUGUUUA	CGCCAGCAGCUGGUGUGAGCAGU	-5.67	0.142893
CUUUACUUGCUUUACA	UGGAGAGAAAGGCAGUUCCUGA	-5.42	0.142857
CUUUACUUGCUUUACA	UGGAGAGAAAGGCAGUUCCUGA	-5.42	0.142857
CCAUACCCACAAAUUUUAC	UGAGGUAGUAGUUUGUACAGUU	-4.81	0.142688
UUGUACUAAUUAUAUGCCUUAUUUCUU	AGUGGGGAGGAUGUCUGGGCAGA	-6.83	0.142529
AAUUUGCUGAUGAUU	AGCAGCACCCAGCAGGACCUG	-5.66	0.142497
AAUUUGCUGAUGAUU	AACAUUCAACCUGUCGGUGAGU	-4.28	0.142287
CUUUACUUGCUUUACA	UGUUGAGGGUGAGCAAAAGUCA	-5.29	0.142204
UUUUACAAUUAAUUG	UGAGGUAGUAAGUUGUAUUGUU	-5.1	0.142029
UUUACUCAACCGCUACUUUAGAC	UGGAGUGUGACAAUGGUGUUU	-4.92	0.14195
UAUUCUGUUAUUUACUUGUAC	CCCAGAAUGUCCUGCUGUGC	-5.22	0.141809
UCUUGUCUGUUAAUC	ACAGACAGCAGGUGUGUGGGCU	-5.76	0.141628
ACACCUAUCCUUCU	UUAUCAGAAUCUCCAGGGGUA	-5.09	0.141428
AAUGGGUGAAUGAUUU	AAAGUGCCAUCUGUCAGCUGA	-5.09	0.14135
UUAGAUAUAUGAAUUCA	UCAGUAACAAAGAUUCAUCCUUG	-4.47	0.141232
AUUUUUGUACUUGUUACU	AAUCGUACAGGGUCAUCCACU	-4.95	0.141227
AUAAACCUAUUGUU	ACAGUAGUCUGCACAUUGGUU	-4.55	0.141217
AUAAACCUAUUGUU	ACAGUAGUCUGCACAUUGGUU	-4.55	0.141217
UUAGAUAUAUGAAUUCA	UGAGAACUGAAUUCCAUGGGUU	-4.86	0.140951
UAUUCUGUUAUUUACUUGUAC	UCAGUAACAAAGAUUCAUCCUUG	-4.46	0.140916
AACACGUUUGAAAU	CAUCAUCGUCUCAAAUGAGUCU	-4.43	0.140903
AACACGUUUGAAAU	CAUCAUCGUCUCAAAUGAGUCU	-4.43	0.140903
CGAAUACCAUAAUGAAU	AGAUCAGAAGGUGAUUGUGGCU	-5.12	0.140892
UUUAAUUUUUCACAAAUAUUAC	CAACACUGUGCUGGAAGAUGG	-5.09	0.14088
UUUGAUAAAAAUCUCUAUGA	CGGUGGACCGUAGAGCAUGCGU	-5.8	0.140879
CCAUACCCACAAAUUUUAC	UACCCUGUAGAUCCGAAUUUGU	-5.05	0.140747
AUUGUUUUUAUGUGUGUU	UGCUGACAUAUUUACUAGAAGG	-4.86	0.140706
CUGUCUUUAUUUCACCUUAUAAUU	GUGGGACUCGGUGAGACUGGCC	-5.98	0.140706
CAAGCUUUGUUAAA	UGCGGGGCUAGGGCUAACAGCA	-5.7	0.14036
AAUGGGUGAAUGAUUU	UUUACUCUCGGUUCCUGUCAGG	-5.4	0.140333
UAUUCUGUUAUUUACUUGUAC	CGGGGUGGGGGCGGGGAGGC	-7.17	0.140258
AAUCAUCAUCUAAA	ACUUGGAUGGGAGACCGCC	-4.76	0.140082
CAAGCUUUGUUAAA	UCAAGAGCAAUAACGAAAAAUGU	-4.51	0.140019
UGUCACUAAGAAAUCU	UUGGUGCUGUUAGUGGGUGCA	-5.06	0.139625
AUUUUUGUACUUGUUACU	UUUGAUAAGCUGACAUGGGAC	-4.96	0.1396
UCUUGUCUGUUAAUC	UAGUAGACCGUAUAGCGUACG	-4.45	0.139542
AAAUGAUUGCUCAA	AGGGUGAUGCAUCUGGAACCAGA	-5.54	0.139476
UAACCUUAACUUGC	UAUUGCACAUUACUAAGUUG	-3.79	0.139338
UUUGAUAAAAAUCUCUAUGA	CAGUGCAAUGAUAUUGUCAAAGC	-4.3	0.139294
AAUGGGUGAAUGAUUU	ACGCCGCCCGUCGGGCCCU	-4.8	0.139252
AAUCAUCAUCUAAA	AAGUUGUUCGUGGUGGAUUCG	-4.85	0.139248
AAUUUGCUGAUGAUU	UUGAUCAGUCGUUGCCUCUCUCU	-5.64	0.139088
AAUUUGCUGAUGAUU	UUGAUCAGUCGUUGCCUCUCUCU	-5.64	0.139088
AAUUUGCUGAUGAUU	UUGAUCAGUCGUUGCCUCUCUCU	-5.64	0.139088
CUGUCUUUAUUUCACCUUAUAAUU	CUGGGGAGGCGGGGAGGGGGA	-7.11	0.139085
CUGUCUUUAUUUCACCUUAUAAUU	CUGGGGAGGCGGGGAGGGGGA	-7.11	0.139085
UAUUCUGUUAUUUACUUGUAC	AUGCUGAAUGACCUUGAGAGC	-5.03	0.139066
UUGUGCAAACUUUA	AUAGGUCAGGGCAUGUGCAGGA	-5.92	0.139
UCAAUUUAAACACC	UGUGACAGAUUGAUAACUGAAAGG	-5.06	0.138973
UUACAAACAAUUUGAUACUU	UUUUGUGAUGUGUUCCUAAUA	-4.03	0.138822
AAACUAUUUUUAGAGAUACU	UGAUGUAGUAGAUUGAAUAGU	-5.95	0.138622
AAACUAUUUUUAGAGAUACU	UAGCACCAUUUGAAAUCAGUG	-4.32	0.138595
AAACUAUUUUUAGAGAUACU	UAGCACCAUUUGAAAUCAGUG	-4.32	0.138595
UGUAUUAAUGCUAAC	UGGAUGAUGCACCCCGGAAU	-4.69	0.138552
UUACCCACUUACUAAA	UGGGUGACGCACCUUGGAAUCGGG	-5.93	0.138422
CAAGCUUUGUUAAA	UGAGGCUCAGUGUAAGGGAACACU	-5.26	0.138275
AAUCAUCAUCUAAA	CAGGUGAUGCACCCCGGAAUCUGA	-5.59	0.138229
AUAAACCUAUUGUU	UUAAUGCUAAUCGUGAUAGGGGU	-5.12	0.138043
UAUUGAAUAUCCUAUAA	CGGGACCCCUCGGGGGAUAUC	-4.9	0.137834
CACAUGCUUUUCCA	GUGGGGGGCCGGGGUGGGG	-6.44	0.137725
AAUGGGUGAAUGAUUU	AACAUUCAUUGCUGUCGGUGGG	-4.91	0.137612
AUUGUUUUUAUGUGUGUU	AAAGAAACAGAAUUUCCGGAGG	-4.49	0.137603
UAAUUCUUUCACAC	AGGUGGAGGCGGGGAGGGGGG	-7.21	0.137333
UUUAAUUUUUCACAAAUAUUAC	UGAUGUAGUAGAUUGAAUAGU	-4.68	0.137268
CUUUAAUUUAACCGUUU	UGAGGUAGUAGGUUGUAUGGUU	-4.6	0.137268
UCUUGUCUGUUAAUC	CCGGGGGAGGCGGGGAGGGGU	-6.84	0.137129
UAACCUUAACUUGC	UUUGCAGGUUCGAUUCUGGUCA	-4.75	0.137085
UUUGAUAAAAAUCUCUAUGA	UGGAAGACUAGUGAUUUUGUUGUU	-4.94	0.136956
UUUGAUAAAAAUCUCUAUGA	UGGAAGACUAGUGAUUUUGUUGUU	-4.94	0.136956
GAAAUGAACGAAAUGU	CCAUGCAACAUUUUGGUGGUG	-4.35	0.136792
AUUUUUGUACUUGUUACU	AAAUUAGCAACUGUUGCAGAGC	-4.25	0.136788
AAUUUGCUGAUGAUU	ACAGACAGCAGGUGUGUGGGCU	-5.56	0.13671
ACUCAAUUACCCCCUGCA	UAGAUCUGGGGUAGGGCCUGGG	-5.7	0.136527
AUAAGAAACCUGCUUCAA	CGCAGUGCUGUCAGUGGGU	-4.92	0.136439
UUUGAUAAAAAUCUCUAUGA	AGCAAGGAUGUCAAACUCG	-4.27	0.136422
UUGUACUAAUUAUAUGCCUUAUUUCUU	UGCCCCCUGGUAGUCGGUGUGU	-5.77	0.136342
AUAAACCUAUUGUU	UUGGUGCUGUUAGUGGGUGCA	-4.94	0.136313
UCUUGUCUGUUAAUC	UGUGUAAUGGUUAGCACUCUGGACU	-5.52	0.136296
AUAAACCUAUUGUU	UUAUAAAGCAAUGAGACUGAUU	-4.12	0.136198
UAAACGAACAUGAAAAUU	CUGCCCUGUGUUCUCUCCAGU	-5.3	0.136177
UAAAAUGAAUUAUC	UCAAGUGUUCUAGUUCAGACA	-4.34	0.136136
UAUUCUGUUAUUUACUUGUAC	UGUAGAAUAAGUGGGAGGCCCC	-4.99	0.135967
AUUGUUUUUAUGUGUGUU	UCAGUGCACUACAGAACUUUGU	-4.77	0.135859
AAUUUGCUGAUGAUU	AAUCGUACAGGGUCAUCCACU	-4.76	0.135806
CUGUCUUUAUUUCACCUUAUAAUU	UAUACAAGGGCAAGCUCUCU	-4.5	0.135706
UAUUCUGUUAUUUACUUGUAC	CACUGUGAGCAGAGCUAUCA	-4.55	0.135699
GAGAAUUUGACUAAAG	UUUGGUCCCCUUCAACCAGCU	-4.29	0.135631
AAACUAUUUUUAGAGAUACU	CAUGGAGGUCUCUGUCUGGCU	-5.43	0.135445
AAUAAUUAAUCUUGUACAA	CUCCCACAUGCAGGGUUUGCA	-4.69	0.135314
AAACUAUUUUUAGAGAUACU	UGAGGUAGUAAGUUGUAUUGUU	-4.84	0.135285
CUUUAAUUUAACCGUUU	UGAGGUAGUAAGUUGUAUUGUU	-4.84	0.135285
UAUUCUGUUAUUUACUUGUAC	UGAGGUAGUAGGUUGUAUAGU	-5.15	0.13515
CAAGCUUUGUUAAA	CCUCUGGCCACAGCGAGGCU	-4.75	0.135097
CAAGCUUUGUUAAA	CCUCUGGCCACAGCGAGGCU	-4.75	0.135097
CAAGCUUUGUUAAA	CCUCUGGCCACAGCGAGGCU	-4.75	0.135097
CAAGCUUUGUUAAA	CCUCUGGCCACAGCGAGGCU	-4.75	0.135097
CAAGCUUUGUUAAA	CCUCUGGCCACAGCGAGGCU	-4.75	0.135097
CAAGCUUUGUUAAA	CCUCUGGCCACAGCGAGGCU	-4.75	0.135097
CAAGCUUUGUUAAA	CCUCUGGCCACAGCGAGGCU	-4.75	0.135097
UUUAUUACCCUGACA	UUCCGGGGUGUAUCACCUGAGA	-4.33	0.135017
CAAGCUUUGUUAAA	CAGGGCUGGGCUGGGUGGG	-5.9	0.134919
AUUUUUGUACUUGUUACU	CAGGGUACGAACGAUCUGGAGCU	-5.78	0.134889
UAAUUCUUUCACAC	AAGCAGAGAAGGGAGCGAAGCC	-5.78	0.134826
UAAUUCUUUCACAC	AAGCAGAGAAGGGAGCGAAGCC	-5.78	0.134826
UAUUGAAUAUCCUAUAA	UUACAGUUGUUCAACCAGUUACU	-4.59	0.134802
UUCCAAAAUCAUAA	UAGCAGCACAUAAUGGUUUG	-4.21	0.13472
CACAAGUCAAACAAAUUUACAAA	UUUGUUUCUGAAAUCUAGUUG	-3.8	0.134704
AAUCAUCAUCUAAA	UAAUACUGCCGGGUAAUGAUGGA	-5.13	0.134646
CACAAGUCAAACAAAUUUACAAA	UGAGGUAGUAGUUUGUACAGUU	-4.53	0.134381
UCUUGUCUGUUAAUC	UGGUAGACUAUGGAACGUAG	-4.4	0.134351
UCAAUUUAAACACC	UGAGGUAGUAAGUUGUAUUGUU	-5.15	0.134348
ACAAUUGGAACUGUAACUUUG	AAGCUGCCAGUUGAAGAACUGU	-4.16	0.13415
UCUUGUCUGUUAAUC	UCACGGCCGGCGGACUGCAUGC	-5.88	0.133758
ACAACAUGUUAAAAACUGUUUA	UGACCUAUGAAUUGACAGACAGU	-4.87	0.133754
UAAUUCUUUCACAC	AAUCCUUGGAACCUAGGUGUGAG	-5.06	0.133686
AAUUUGCUGAUGAUU	AAAGGUUGGCAACCGCUGGU	-4.4	0.133576
AUUUUUGUACUUGUUACU	UGAAGUGCGCCUUCCUGAGUAGA	-5.24	0.133503
AAUUUGCUGAUGAUU	UCAGCGGCCUCCUCCGGGACCG	-5.18	0.133471
AAAUGAUUGCUCAA	AGUAGUUAUUCUGCCUGCCAGU	-4.67	0.133314
AUAAGAAACCUGCUUCAA	UUGGUGCUGUUAGUGGGUGCA	-4.83	0.133278
UAUUCUGUUAUUUACUUGUAC	UGAGCUAAGUUGAUGGACAUAG	-4.64	0.133218
GAGAAUUUGACUAAAG	UCAGAGGUCGAAUAGCCUGCU	-4.53	0.133118
UCAAUUUAAACACC	UGAGGUAGUAGGUUGUAUGGUU	-4.92	0.133043
CAAGCUUUGUUAAA	UGAGGGGCAGAGAGCGAGACU	-5.68	0.132897
ACAACAUGUUAAAAACUGUUUA	UGGCAGUUGGACAUCCCCUGAAA	-5.18	0.132821
UUGUACUAAUUAUAUGCCUUAUUUCUU	CAAAGUGCUUACAGUGCAGGUAG	-4.88	0.132681
UUUAAUUUUUCACAAAUAUUAC	UUAAGACUUGCAGUGAUGUU	-3.93	0.132681
UGUAUUAAUGCUAAC	AGAGGUCUUCCAUGAUGCAUU	-4.55	0.132576
UCAAUUUAAACACC	UAUUGCACAUUACUAAGUUG	-3.6	0.132353
AAAGAACUUCACAACUGCUC	UCCUUCUGUGGGGCGAUCGAU	-4.96	0.132337
CUUUACUUGCUUUACA	ACAGACAGCAGGUGUGUGGGCU	-5.38	0.132284
AUUUUUGUACUUGUUACU	UGCUGUGUGAGCAGGUGUCGGA	-5.21	0.132234
AAUAAUUAAUCUUGUACAA	UAUACAAGGGCAAGCUCUCU	-4.38	0.132087
AUCCAUCAAAACCA	CAGCAGCAAUUCAUGUUUUGA	-4.02	0.132063
UUAGAUAUAUGAAUUCA	UGGAAUGUAAAGAAGUAUGUAU	-4.51	0.132051
UUAGAUAUAUGAAUUCA	UGGAAUGUAAAGAAGUAUGUAU	-4.51	0.132051
UUGUACUAAUUAUAUGCCUUAUUUCUU	ACAGACAGCAGGUGUGUGGGCU	-5.36	0.131792
UUGUACUAAUUAUAUGCCUUAUUUCUU	UUGGUGCUGUUAGUGGGUGCA	-4.77	0.131623
AUAAGAAACCUGCUUCAA	CACUGACCACCAGGGGGCAGC	-4.97	0.131551
CAAGCUUUGUUAAA	AAAGGUUGGCAACCGCUGGU	-4.33	0.131451
AAUGGGUGAAUGAUUU	GAGUAUUGUUUCUGCUGCCCGGG	-5.73	0.131422
AAUAAUUAAUCUUGUACAA	UGAGGUAGUAGGUUGUAUAGU	-5.11	0.13141
AUAAGAAACCUGCUUCAA	UUGGGCGCUGGCAGUGGGUGU	-5.52	0.131366
CCAAUGGAAAAACUCAA	UGUUGUACUUUUUUUUUGUU	-2.93	0.131272
UUGUACUAAUUAUAUGCCUUAUUUCUU	UUGAAGCCUAGGGCGCGGGCC	-5.13	0.131269
AAUUUGCUGAUGAUU	UAAGGCACGCGGUGAAUGCC	-4	0.131234
AAUUUGCUGAUGAUU	UAAGGCACGCGGUGAAUGCC	-4	0.131234
AUUUUUGUACUUGUUACU	GAUCGGGCCUAAACAGGUAGU	-4.58	0.131157
UUUACUCAACCGCUACUUUAGAC	UAAAGUGCUUAUAGUGCAGGUAG	-4.41	0.131094
UAUUCUGUUAUUUACUUGUAC	UGAGGGGCAGAGAGCGAGACU	-5.6	0.131025
UUUAUUACCCUGACA	CCUGGGCCUCCCUCUUUGGGGUG	-5.52	0.13093
AAUUUGCUGAUGAUU	AGUGGCAGAGCAUUUGACU	-4.23	0.130919
AUUUUUGUACUUGUUACU	UGUGCAAAUCUAUGCAAAACUGA	-3.77	0.130903
UUAGAUAUAUGAAUUCA	UUUUGUGAUGUGUUCCUAAUA	-3.8	0.130899
UUGUACUAAUUAUAUGCCUUAUUUCUU	CGGGGGGUGGCGGGGAGGU	-6.11	0.130835
UGUAUUAAUGCUAAC	AGGGUGAUGCAUCUGGAACCAGA	-5.19	0.130665
AAUGGGUGAAUGAUUU	UAUUGCACUUGUCCCGGCCUGU	-5.45	0.130601
AAUGGGUGAAUGAUUU	UAUUGCACUUGUCCCGGCCUGU	-5.45	0.130601
AAUUUGCUGAUGAUU	UUCCUGGUCAUCUCCUCUGUAGC	-5.68	0.130515
ACAACAUGUUAAAAACUGUUUA	AAGAUGAGCAGCUCUGAACC	-4.54	0.130497
UUGUUAAAAUUUAUUG	UUUGGCAAUGGUAGAACUCACA	-4.67	0.130483
UUGUACUAAUUAUAUGCCUUAUUUCUU	GUGGGGGGCCGGGGUGGGG	-6.1	0.130453
CUGUCUUUAUUUCACCUUAUAAUU	CAGGGCUGGGCUGGGUGGG	-5.7	0.130345
GAGAAUUUGACUAAAG	AUAGGUCAGGGCAUGUGCAGGA	-5.55	0.130312
UGUCACUAAGAAAUCU	UGGGUGACGCACCUUGGAAUCGGG	-5.58	0.130252
AAUGGGUGAAUGAUUU	GCAGGGCUCGCUCGGCACCCG	-5.16	0.130106
AUUGUUUUUAUGUGUGUU	ACAGUAGUCUGCACAUUGGUU	-4.19	0.130043
AUUGUUUUUAUGUGUGUU	ACAGUAGUCUGCACAUUGGUU	-4.19	0.130043
AUUGUUUUUAUGUGUGUU	UUAGGUGAUGCACCCUGGAAU	-3.88	0.12994
UUUACUCAACCGCUACUUUAGAC	CGGGGACCAUCGGUUGGCGACU	-5.34	0.129864
AUUGUUUUUAUGUGUGUU	CUCCCACAUGCAGGGUUUGCA	-4.5	0.129833
AAUGGGUGAAUGAUUU	AAGUUGUUCGUGGUGGAUUCG	-4.52	0.129773
AAUCAUCAUCUAAA	UGGUGAUCAGCUGUUGCCU	-4	0.129576
UUACAAACAAUUUGAUACUU	UAGCUUAUCAGACUGAUGUUGA	-4.22	0.129567
CUGUCUUUAUUUCACCUUAUAAUU	CCGGGGGAGGCGGGGAGG	-5.39	0.129536
UUUUACAAUUAAUUG	UACCCUGUAGAACCGAAUUUGU	-4.6	0.129468
CAAGCUUUGUUAAA	UACCCAUUGCAUAUCGGAGUUG	-4.56	0.129435
UAUUGAAUAUCCUAUAA	AGUGGGGAGGAUGUCUGGGCAGA	-6.19	0.129174
AUUUUUGUACUUGUUACU	UGUGCAAAUCCAUGCAAAACUG	-3.73	0.129066
AUUUUUGUACUUGUUACU	UGUGCAAAUCCAUGCAAAACUG	-3.73	0.129066
ACAAUUGGAACUGUAACUUUG	UGGGACUGCCAGUUUCGGCCU	-4.53	0.128876
UAUUCUGUUAUUUACUUGUAC	ACCACAGGGUAGAACCACGGACA	-5.24	0.128621
AUAAGAAACCUGCUUCAA	UGAGGGGCAGAGAGCGAGCCC	-4.74	0.12856
AUUGUUUUUAUGUGUGUU	UGGAAUGUAAAGAAGUAUGUAU	-4.05	0.128519
GCUCUCACUCAACAUGG	CAGCAGCAAUUCAUGUUUUGA	-3.91	0.128449
AUUGUUUUUAUGUGUGUU	UGGGUGACGCACCUUGGAAUCGGG	-5.5	0.128385
UUGUUAAAAUUUAUUG	UGAGGUAGUAGAUUGUAUAGU	-4.17	0.128308
AUUUUUGUACUUGUUACU	UGAGGGGCAGAGAGCGAGACU	-5.48	0.128217
GAAAUUAAAUUGGCAAA	ACUUGCACCUGCUGAUGGCACU	-4.64	0.128212
UUAGAUAUAUGAAUUCA	UAUAUAUAUAUAUGUACGUAUG	-3.2	0.128154
UUAGAUAUAUGAAUUCA	UACCCUGUAGAACCGAAUUUGU	-4.55	0.128061
UUAAAAAUCUGAAUUCUUC	CGGGGGGUGGCGGGGAGGU	-5.98	0.128051
AAUUUGCUGAUGAUU	UGCUGUGUGAGCAGGUGUCGGA	-5.04	0.127919
UUGUACUAAUUAUAUGCCUUAUUUCUU	AAGAUGAGCAGCUCUGAACC	-4.45	0.12791
AAUAAUUAAUCUUGUACAA	AUCACAUUGCCAGGGAUUACC	-4.67	0.12791
AUUGUUUUUAUGUGUGUU	AAGCCCUUACCCCAAAAAGCAU	-4.36	0.127859
AUUGUUUUUAUGUGUGUU	AAGCCCUUACCCCAAAAAGCAU	-4.36	0.127859
CACAUGCUUUUCCA	UGCCCCCUGGUAGUCGGUGUGU	-5.41	0.127836
GAAAUUAAAUUGGCAAA	ACUUGCACCUGCUGAUGGCAUG	-4.7	0.127822
CUGUCUUUAUUUCACCUUAUAAUU	CAGUGCAAUGUUAAAAGGGCA	-4.14	0.12766
UAAUUCUUUCACAC	CAAAGAAUUCUCCUUUUUGGCUA	-3.92	0.127604
AAUCAUCAUCUAAA	UGAGGGGUGAUUAGGGCCAGC	-5.34	0.127416
AAUCAUCAUCUAAA	UGAGGGGUGAUUAGGGCCAGC	-5.34	0.127416
AAUCAUCAUCUAAA	UGAGGGGUGAUUAGGGCCAGC	-5.34	0.127416
UAAAAUGAAUUAUC	UUUCCUCAUAUUCAUUCAGGAGUG	-4.14	0.127345
GAAAUGAACGAAAUGU	AAGCACUGUUCGUGACCUGUGG	-4.62	0.127063
UCUUGAAACUGCUCAA	UCAGAUCCUGUCCUCCUUUCAAGG	-5.19	0.126988
AAUUUGCUGAUGAUU	CGGGGACCAUCGGUUGGCGACU	-5.22	0.126946
UCUUGAAACUGCUCAA	UGGCAGUUGGACAUCGCCUGAGG	-5.12	0.126858
ACAAUUGGAACUGUAACUUUG	UUAGACCAUUGUCAAUUGAGAUG	-4.09	0.126665
UUUGAUAAAAAUCUCUAUGA	UUCCCUUUGUCAUCCUUUGCCU	-4.93	0.126573
UUUGAUAAAAAUCUCUAUGA	UUCCCUUUGUCAUCCUUUGCCU	-4.93	0.126573
AUUGUUUUUAUGUGUGUU	UGGAAUGUAAAGAAGUAUGUAU	-4.05	0.126532
CAAGCUUUGUUAAA	UCCGGUUCUCAGGGCUCCACC	-5.23	0.126512
CAAGCUUUGUUAAA	AUCGAGGCUAGAGUCACGCUUGG	-5.21	0.126456
UUUUACAAUUAAUUG	UGUAGAAUAAGUGGGAGGCCCC	-4.64	0.126431
AUUUUUGUACUUGUUACU	GGUUCCAGAGUGCAUCACCUGA	-4.39	0.126186
UUCCAAAAUCAUAA	CAAAGAAUUCUCCUUUUGGGCU	-3.97	0.126152
UUACAAACAAUUUGAUACUU	UAUUGCACAUUACUAAGUUG	-3.43	0.126103
AUUUUUGUACUUGUUACU	AGGUGACGCACCCAGGAAUCGGG	-5.26	0.126079
CAAGCUUUGUUAAA	GCAGGGCUCGCUCGGCACCCG	-5	0.126072
AAACUAUUUUUAGAGAUACU	UAGCACCAUUUGAAAUCGGUU	-3.73	0.126056
UUUGAUAAAAAUCUCUAUGA	UUUACUCUCGGUUCCUGUCAGG	-4.85	0.12604
AAUGGGUGAAUGAUUU	GGUUCCAGAGUGCAUCACCUGA	-4.38	0.125898
GCUCUCACUCAACAUGG	GUGGGACUCGGUGAGACUGGCC	-5.35	0.125882
AUUGUUUUUAUGUGUGUU	UGAGGGGCAGAGAGCGAGCCC	-4.64	0.125848
UUACAAACAAUUUGAUACUU	UAUAUUCUGCUGUUUUGUGAGA	-3.94	0.125798
UUACAAACAAUUUGAUACUU	UAUAUUCUGCUGUUUUGUGAGA	-3.94	0.125798
UAAUUCUUUCACAC	UGUGACAGAUUGAUAACUGAAAGG	-4.58	0.12579
CACAUGCUUUUCCA	UAUACAAGGGCAAGCUCUCU	-4.17	0.125754
UUCCAAAAUCAUAA	AAGGGCUGUUUUGGUACCGGAAA	-4.79	0.125689
UGUAUUAAUGCUAAC	UGUGUAAUGGUUAGCACUCUGGACU	-5.09	0.125679
ACACCUAUCCUUCU	UGCCCAGGUCGGAAGGAGCUG	-4.69	0.125603
ACACCUAUCCUUCU	UGCCCAGGUCGGAAGGAGCUG	-4.69	0.125603
AAUUUGCUGAUGAUU	AGCCAGCAGUAGGACAUCCCCC	-5.48	0.125602
AAUUUGCUGAUGAUU	UAGCAGCACGUAAAUAUUGGCG	-4.45	0.125529
AAUUUGCUGAUGAUU	UAGCAGCACGUAAAUAUUGGCG	-4.45	0.125529
UCAAUUUAAACACC	UGAGCUAAGUUGAUGGACAUAG	-4.37	0.125467
UUAGAUAUAUGAAUUCA	AGGAUGUCUGACUGCUGGCU	-4.74	0.125264
UUAAAAAGUUGAAGAA	ACGCCCUUCCCCCCCUUCUUCA	-5.94	0.125264
UUUGAUAAAAAUCUCUAUGA	UUCCCUUUGUCAUCCUAUGCCU	-4.94	0.125158
UUACAAACAAUUUGAUACUU	UAUCAGGCUUGGACAGGGGAC	-5.21	0.12509
UUUACUCAACCGCUACUUUAGAC	CGAGGACCAUCGGUUGGCGACU	-4.81	0.125032
GCUCUCACUCAACAUGG	AGUGGGGAGGAUGUCUGGGCAGA	-5.99	0.125
AAUGGGUGAAUGAUUU	CCAAACCAGUUGUGCCUGUAGC	-4.69	0.1249
UAAACAUAUAACUUCUA	AAGUUGUUCGUGGUGGAUUCG	-4.35	0.124892
UUAAAAAUUACAGAA	UAUAUUCUGCUGUUUUGUGAGA	-3.91	0.12484
UUAAAAAUUACAGAA	UAUAUUCUGCUGUUUUGUGAGA	-3.91	0.12484
AAACUAUUUUUAGAGAUACU	UAGCAGCACAUAAUGGUUUG	-3.9	0.1248
UCUUGUCUGUUAAUC	GCGGGACUGGGCGAGUUGAGC	-5.31	0.124677
AAACUAUUUUUAGAGAUACU	UGAGGUAGUAGUUUGUACAGUU	-4.2	0.124592
AAUCAUCAUCUAAA	CCAUGCAACAUUUUGGUGGUG	-3.96	0.124528
UUACAAACAAUUUGAUACUU	UUAUCAGAAUCUCCAGGGGUA	-4.48	0.124479
CACAAGUCAAACAAAUUUACAAA	GGAUAUCAUCGUAUACUGUAAGU	-4.36	0.124465
UUGUUAAAAUUUAUUG	UGACCUAUGAAUUGACAGACAGU	-4.53	0.124416
UUAGAUAUAUGAAUUCA	UACCCUGUAGAUCCGAAUUUGU	-4.46	0.124303
AAUGGGUGAAUGAUUU	UUCCGGAGUGCAUCACCUGAGA	-4.52	0.124142
AAUGGGUGAAUGAUUU	UUCCGGAGUGCAUCACCUGAGA	-4.52	0.124142
AAUGGGUGAAUGAUUU	UUCCGGAGUGCAUCACCUGAGA	-4.52	0.124142
AAUGGGUGAAUGAUUU	UAUGGCUUUUCAUUCCUAUGUGA	-4.22	0.123972
UUUGAUAAAAAUCUCUAUGA	UUAGACCAUUGUCAAUUGAGAUG	-4	0.123877
UUAAAAAUCUGAAUUCUUC	AAGUUGUUCGUGGUGGAUUCG	-4.31	0.123744
UUUUACAAUUAAUUG	CACUAGAUUGUGAGCUCCUGGA	-4.7	0.123684
CUGUCUUUAUUUCACCUUAUAAUU	UAUAUUCUGCUGUUUUGUGAGA	-3.87	0.123563
CUGUCUUUAUUUCACCUUAUAAUU	UAUAUUCUGCUGUUUUGUGAGA	-3.87	0.123563
UAUUCUGUUAUUUACUUGUAC	UAGCAGCACAUAAUGGUUUG	-3.86	0.12352
GAGAAUUUGACUAAAG	AAGUUGUUCGUGGUGGAUUCG	-4.3	0.123457
UUGUACUAAUUAUAUGCCUUAUUUCUU	UGUAGAAUAAGUGGGAGGCCCC	-4.53	0.123433
CCAAUGGAAAAACUCAA	CAGCGUGGGUUUGAACUGUGC	-4.52	0.12343
CAAGCUUUGUUAAA	CAGCGUGGGUUUGAACUGUGC	-4.52	0.12343
AAAUGAUUGCUCAA	UGGAGAGAAAGGCAGUUCCUGA	-4.68	0.123353
AAAUGAUUGCUCAA	UGGAGAGAAAGGCAGUUCCUGA	-4.68	0.123353
UAUUCUGUUAUUUACUUGUAC	GUGCAGAUCUUGGUGGUAGUAGCA	-5.22	0.123288
CAAGCUUUGUUAAA	AAUCGUACAGGGUCAUCCACU	-4.32	0.123252
UUAGAUAUAUGAAUUCA	UUUUGCAAUAUGUUCCUGAAU	-3.56	0.123183
CUGUCUUUAUUUCACCUUAUAAUU	GAGGAUCUCAGGAGGUAGUCU	-4.74	0.123117
AAAUGAUUGCUCAA	UGCUGUGUGAGCAGGUGUCGGA	-4.85	0.123096
CUGUCUUUAUUUCACCUUAUAAUU	CCGGGGGAGGCGGGGAGGGGU	-6.14	0.123095
CACAUGCUUUUCCA	AGAUCAGAAGGUGAUUGUGGCU	-4.47	0.123005
UUGUACUAAUUAUAUGCCUUAUUUCUU	UGUGUAAUGGUUAGCACUCUGGACU	-4.98	0.122963
CAAGCUUUGUUAAA	UUAAUGCUAAUCGUGAUAGGGGU	-4.56	0.122944
AAACUAUUUUUAGAGAUACU	UGAGGUAGUAGGUUGUAUAGU	-4.99	0.122863
UUUGAUAAAAAUCUCUAUGA	UGUUGUACUUUUUUUUUGUU	-2.74	0.12276
CUGUCUUUAUUUCACCUUAUAAUU	AGAGGUAGUAGGUUGCAUAGU	-4.4	0.122734
CUUUACUUGCUUUACA	AAGGUAGAUAGAACAGGUCUUGU	-4.56	0.122647
UUAGAUAUAUGAAUUCA	UAAACCAGGGGUCGUGAGUUC	-4.41	0.122602
AAAUGAUUGCUCAA	UGAGGGGUGAUUAGGGCCAGC	-5.13	0.122405
AAAUGAUUGCUCAA	UGAGGGGUGAUUAGGGCCAGC	-5.13	0.122405
AAAUGAUUGCUCAA	UGAGGGGUGAUUAGGGCCAGC	-5.13	0.122405
UAUUCUGUUAUUUACUUGUAC	CAGGUGAUGCACCCCGGAAUCUGA	-4.95	0.122404
UUUACUCAACCGCUACUUUAGAC	UGUUGAGGGUGAGCAAAAGUCA	-4.54	0.122043
UUAAAAAUCUGAAUUCUUC	AUCUCAGGUUCGUCAGCCCAUG	-4.68	0.12197
UCUUGUCUGUUAAUC	AAUAAUACAUGGUUGAUCUU	-3.18	0.121886
AAAUGAUUGCUCAA	UGCCCCCUGGUAGUCGGUG	-4.47	0.121865
AAAUGAUUGCUCAA	UGCCCCCUGGUAGUCGGUG	-4.47	0.121865
AUAAACCUAUUGUU	AACAUUCAUUGUUGUCGGUGGG	-4	0.121729
CACAUGCUUUUCCA	GAGAGAUCAGAGGCGCAGAGU	-5.09	0.121712
UAUUCUGUUAUUUACUUGUAC	UUUGGCAAUGGUAGAACUCACA	-4.35	0.121542
AAAUGAUUGCUCAA	AGUGGGGAGGAUGUCUGGGCAGA	-5.82	0.121452
ACUCAAUUACCCCCUGCA	UGCCAUCAGUGGUUGUGAGCG	-4.31	0.121443
ACUCAAUUACCCCCUGCA	UGCCAUCAGUGGUUGUGAGCG	-4.31	0.121443
AAAGAACUUCACAACUGCUC	AGUAGUUAUUCUGCCUGCCAGU	-4.25	0.121325
UUUAAUUUUUCACAAAUAUUAC	UGCCAUCAGUGGUUGUGAGCG	-4.3	0.121161
UUUAAUUUUUCACAAAUAUUAC	UGCCAUCAGUGGUUGUGAGCG	-4.3	0.121161
AAUUUGCUGAUGAUU	UGCCCCCUGGUAGUCGGUG	-4.44	0.121047
AAUUUGCUGAUGAUU	UGCCCCCUGGUAGUCGGUG	-4.44	0.121047
CCAUACCCACAAAUUUUAC	CCAAAUUCACGCAAGAUUUG	-3.23	0.121019
CCAUACCCACAAAUUUUAC	CCAAAUUCACGCAAGAUUUG	-3.23	0.121019
CCAUACCCACAAAUUUUAC	CCAAAUUCACGCAAGAUUUG	-3.23	0.121019
CACAUGCUUUUCCA	CUGGGCAUGGAACGCUUGCC	-3.99	0.120982
UAAUUCUUUCACAC	GCUGGAGGAGAUGGAGGCUC	-5.03	0.120972
UCUUGUCUGUUAAUC	UGAUGUAGUAGAUUGAAUAGU	-4.36	0.120801
UUUUACAAUUAAUUG	UGGAAUGUAAAGAAGUAUGUAU	-4.21	0.120801
UUUUACAAUUAAUUG	UGGAAUGUAAAGAAGUAUGUAU	-4.21	0.120493
UUCCAAAAUCAUAA	UGAGGUAGUAGGUUGUAUGGUU	-4.15	0.120493
CUGUCUUUAUUUCACCUUAUAAUU	UUAGACCAUUGUCAAUUGAGAUG	-3.89	0.120471
UUAAAAAUCUGAAUUCUUC	AUGCACCUGGGCAAGGAUUC	-4.18	0.120426
UUAGAUAUAUGAAUUCA	UCUUUGGUUAUCUAGCUGUAUGA	-4.26	0.120407
UAUUCUGUUAUUUACUUGUAC	AGCAGCACCCAGCAGGACCUG	-4.78	0.120342
AAUUUGCUGAUGAUU	CGAGGACCAUCGGUUGGCGACU	-4.62	0.120094
UUUGAUAAAAAUCUCUAUGA	GCUGGAGGAGAUGGAGGCUC	-4.99	0.12001
AUAAACCUAUUGUU	UAGCAGCACAUAAUGGUUUG	-3.75	0.12
CCAUACCCACAAAUUUUAC	AAAGAAACAGAAUUUCCGGAGG	-3.91	0.119828
AUUGUUUUUAUGUGUGUU	CUUGACCAAAGAAUAGACCU	-3.66	0.119804
UAAACAUAUAACUUCUA	UUAAUGCUAAUCGUGAUAGGGGU	-4.44	0.119709
GAGAAUUUGACUAAAG	UUUGGUCCCCUUCAACCAGCUGU	-4.3	0.119677
GAGAAUUUGACUAAAG	UUUGGUCCCCUUCAACCAGCUGU	-4.3	0.119677
GAAAUUAAAUUGGCAAA	CAGCGUGGGUUUGAACUGUGC	-4.38	0.119607
UAAACAUAUAACUUCUA	CCAAACCAGUUGUGCCUGUAGC	-4.49	0.119574
ACACCUAUCCUUCU	CGGGACCCCUCGGGGGAUAUC	-4.25	0.11955
UAAACGAACAUGAAAAUU	UUUGUUUCUGAAAUCUAGUUG	-3.37	0.119461
CCAAUGGAAAAACUCAA	UAUGGCUUUUCAUUCCUAUGUGA	-4.05	0.118978
CCAAUGGAAAAACUCAA	CACCCAGGUGUUUGUUGGAAUC	-4.22	0.118907
CCAAUGGAAAAACUCAA	CACCCAGGUGUUUGUUGGAAUC	-4.22	0.118907
UUGUACUAAUUAUAUGCCUUAUUUCUU	CAGGGUACGAACGAUCUGGAGCU	-5.09	0.118786
GAAAUUAAAUUGGCAAA	CGCAGUGCUGUCAGUGGGU	-4.28	0.118691
UCUUGUCUGUUAAUC	CGGGGACCAUCGGUUGGCGACU	-4.88	0.118677
CGAAUACCAUAAUGAAU	UUUCCUCAUAUUCAUUCAGGAGUG	-3.85	0.118425
UCUUGAAACUGCUCAA	CAGGGCUGGGCUGGGUGGG	-5.17	0.118225
GAGAAUUUGACUAAAG	UACCCUGUAGAACCGAAUUUGU	-4.2	0.11821
UUUUACAAUUAAUUG	UAUAUUCUGCUGUUUUGUGAGA	-3.7	0.118135
UUUUACAAUUAAUUG	UAUAUUCUGCUGUUUUGUGAGA	-3.7	0.118135
CUUUAAUUUAACCGUUU	GGUGGUUCAGUGGUAGAA	-3.79	0.118032
UAUUCUGUUAUUUACUUGUAC	GAUCGGGCCUAAACAGGUAGU	-4.12	0.117984
UAUUCUGUUAUUUACUUGUAC	AUAGCUCAGAAUGUCACUUCUG	-3.52	0.117962
UAUUCUGUUAUUUACUUGUAC	AUAGCUCAGAAUGUCACUUCUG	-3.52	0.117962
UUUGAUAAAAAUCUCUAUGA	AUGUAUCAGACCCUGCCUCU	-4.24	0.117942
ACAACAUGUUAAAAACUGUUUA	UGAUAUGUUUGAUAUAUUAGGU	-3.1	0.117916
AAAUGAUUGCUCAA	UGGUGAUCAGCUGUUGCCU	-3.64	0.117914
ACACCUAUCCUUCU	CUGGCCAUGCCCCCCAGAGGGA	-4.72	0.117912
AUUGUUUUUAUGUGUGUU	AGGUGGAGGCGGGGAGGGGGG	-6.19	0.117905
UUGUACUAAUUAUAUGCCUUAUUUCUU	UUCUUCCAGAGGUGAUGGAACU	-3.76	0.117868
AUUUUUGUACUUGUUACU	GUGCAGAUCUUGGUGGUAGUAGCA	-4.98	0.117619
AAACUAUUUUUAGAGAUACU	UCUCUGGGCCUGUGUCUUAGGCU	-4.26	0.117615
UUGUUAAAAUUUAUUG	UGGGAAAGUGCUUUGACAUAGU	-4.22	0.117614
UGUAUUAAUGCUAAC	UUAAUGCUAAUCGUGAUAGGGGU	-4.36	0.117552
AAUUUGCUGAUGAUU	UAUGGCACUGGUAGAAUUCACU	-4.31	0.117471
CUUUAAUUUAACCGUUU	GCGGGACUGGGCGAGUUGAGC	-4.99	0.117164
UAAUUCUUUCACAC	UGCUGUGUGAGCAGGUGUCGGA	-4.61	0.117005
ACAAUUGGAACUGUAACUUUG	UCCGUGCACCAGGCCUAUAGUU	-4.71	0.11699
UAAUUCUUUCACAC	UCACCCUGCAGAGAGAGGCC	-4.44	0.116873
UAAUUCUUUCACAC	UCACCCUGCAGAGAGAGGCC	-4.44	0.116873
AAUGGGUGAAUGAUUU	AACAUUCAUUGUUGUCGGUGGG	-3.84	0.116859
UGUAUUAAUGCUAAC	UUGGUGCUGUUAGUGGGUGCA	-4.23	0.116722
UCUUGUCUGUUAAUC	UCCUCCCUCCAUGGACACU	-3.97	0.116696
AUUUUUGUACUUGUUACU	UGGUGACGCACCCCAGAAUUG	-4.02	0.116691
UAUUCUGUUAUUUACUUGUAC	CAGUGCAAUGAUAUUGUCAAAGC	-3.6	0.116618
UAUUCUGUUAUUUACUUGUAC	UUUGCAGGUUCGAUUCUGGUCA	-4.04	0.116595
UUUACUCAACCGCUACUUUAGAC	ACCACAGGGUAGAACCACGGACA	-4.75	0.116593
ACAACAUGUUAAAAACUGUUUA	UUUUGCGAUGUGUUCCUAAUA	-3.55	0.116585
AUAAGAAACCUGCUUCAA	CGGGGGGUGGCGGGGAGGU	-5.44	0.116488
UUUUACAAUUAAUUG	UAAUUAAGGGUCAAAGUACACU	-3.74	0.116438
UUUUACAAUUAAUUG	UAAUUAAGGGUCAAAGUACACU	-3.74	0.116438
AUAAGAAACCUGCUUCAA	UGAAGUGCGCCUUCCUGAGUAGA	-4.57	0.116433
AAAUGAUUGCUCAA	UGCCCCCUGGUAGUCGGUGUGC	-4.82	0.116397
AUAAGAAACCUGCUUCAA	UCGGCACCAUCAGCGGGUGUGA	-4.33	0.116367
AUAAGAAACCUGCUUCAA	UGUAGAAUAAGUGGGAGGCCCC	-4.27	0.116349
AAAUGAUUGCUCAA	UUACAGUUGUUCAACCAGUUACU	-3.96	0.1163
UAAUUCUUUCACAC	GGGGCCGGGGAGGGGGCC	-4.16	0.116136
CACAUGCUUUUCCA	UGUAGAAUAAGUGGGAGGCCCC	-4.26	0.116076
UUUAAUUUUUCACAAAUAUUAC	UAUGUAAUAUGGUCCACGUCU	-3.81	0.116017
UUAAAAAUUACAGAA	UGAGGUAGUAGUUUGUACAGUU	-3.91	0.115989
UUUAAUUUUUCACAAAUAUUAC	AGCUGGUGUUGUGAAUCAGGCCG	-4.58	0.115832
UCAAUUUAAACACC	CAGCGUGGGUUUGAACUGUGC	-4.23	0.115511
UAAUUCUUUCACAC	AGGUGACACACCCCGGAAUUG	-3.89	0.115465
AUUUUUGUACUUGUUACU	AGGUGACACACCCCGGAAUUG	-3.89	0.115465
GAGAAUUUGACUAAAG	UACCCUGUAGAUCCGAAUUUGU	-4.14	0.115385
UUACCCACUUACUAAA	AACAUUCAACGCUGUCGGUGAGU	-4.1	0.115169
UUACCCACUUACUAAA	AACAUUCAACGCUGUCGGUGAGU	-4.1	0.115169
AUUGUUUUUAUGUGUGUU	UGGAGAGAAAGGCAGUUCCUGA	-4.36	0.114918
AUUGUUUUUAUGUGUGUU	UGGAGAGAAAGGCAGUUCCUGA	-4.36	0.114918
UAUUCUGUUAUUUACUUGUAC	UGAAGUGCGCCUUCCUGAGUAGA	-4.51	0.114904
UCUUUACCAACCACCACAAACCUCUAU	UGAGGCUCAGUGUAAGGGAACACU	-4.37	0.114879
UUAGAUAUAUGAAUUCA	UUUUGGUCCCAUGUCUAGAGCU	-4.08	0.1148
UAAAAUGAAUUAUC	UAGGUAGUUUCAUGUUGUUGGGA	-4.23	0.114759
UUUGAUAAAAAUCUCUAUGA	AGGUGGAGGCGGGGAGGGGGG	-6.02	0.114667
CACAAGUCAAACAAAUUUACAAA	UAAACCAGGGGUCGUGAGUUC	-4.12	0.11454
AAAUGAUUGCUCAA	UAGGUAGUUUCCUGUUGUUGGGA	-4	0.114515
ACAACAUGUUAAAAACUGUUUA	UAUGUAAUAUGGUCCACGUCU	-3.76	0.114495
AAAUGAUUGCUCAA	UCUUUGGCCCCUUGAGUGUGG	-4.55	0.114465
UUUUACAAUUAAUUG	UGCCAUCAGUGGUUGUGAGCG	-4.06	0.114398
UUUUACAAUUAAUUG	UGCCAUCAGUGGUUGUGAGCG	-4.06	0.114398
CUUUACUUGCUUUACA	UGAAGUGCGCCUUCCUGAGUAGA	-4.49	0.114395
AAAUGAUUGCUCAA	UGGCAGUUGGACAUCCCCUGAAA	-4.46	0.114359
ACAACAUGUUAAAAACUGUUUA	GUCCAGUUUUCCCAGGAAU	-3.25	0.114316
AUAAGAAACCUGCUUCAA	UCCUUCUGUGGGGCGAUCGAU	-4.28	0.114194
ACAAUUGGAACUGUAACUUUG	AAAGGUUGGCAACCGCUGGU	-3.76	0.114147
CUUUAAUUUAACCGUUU	UGACCUAUGAAUUGACAGACAGU	-4.15	0.11398
CGAAUACCAUAAUGAAU	AACAUUCAUUGCUGUCGGUGGG	-4.06	0.113789
CCAAUGGAAAAACUCAA	UUAGCUUCUAUUUCCUGGACU	-3.77	0.113725
UUAAAAAGUUGAAGAA	UUAGCUUCUAUUUCCUGGACU	-3.77	0.113725
UCAAUUUAAACACC	AGAGGUAGUAGGUUGCAUAGU	-4.07	0.113529
GAAAUGAACGAAAUGU	UAUAUUCUGCUGUUUUGUGAGA	-3.55	0.113346
GAAAUGAACGAAAUGU	UAUAUUCUGCUGUUUUGUGAGA	-3.55	0.113346
UUUAAUUUUUCACAAAUAUUAC	GAGAGAUCAGAGGCGCAGAGU	-4.74	0.113343
CUUUAAUUUAACCGUUU	AGAGGUAGUAGGUUGCAUAGU	-4.06	0.11325
UAUUCUGUUAUUUACUUGUAC	UUCUUCCAGAGGUGAUGGAACU	-3.61	0.113166
UUAGAUAUAUGAAUUCA	UAGGUAGUUUCAUGUUGUUGGGA	-4.17	0.113131
AUAAGAAACCUGCUUCAA	CCUGGCGCCAUCAGUGGGU	-4.15	0.11311
UAAUUCUUUCACAC	CGGGGUGGGGGCGGGGAGGC	-5.78	0.113067
UCUUGUCUGUUAAUC	AAAGGUUGGCAACCGCUGGU	-3.72	0.112933
UAACCUUAACUUGC	UAAACCAGGGGUCGUGAGUUC	-4.06	0.112872
CACAUGCUUUUCCA	AGAGGUAAAAAUUUGAUUUGACU	-3.42	0.112871
CAAGCUUUGUUAAA	UUUUGGUCCCAUGUCUAGAGCU	-4.01	0.112831
UUUAUUACCCUGACA	UACAGUACUGUGAUAACUGAAG	-3.47	0.112516
UUUAUUACCCUGACA	UACAGUACUGUGAUAACUGAAG	-3.47	0.112516
CUGUCUUUAUUUCACCUUAUAAUU	UUAAUGCUAAUCGUGAUAGGGGU	-4.16	0.11216
UCUUGUCUGUUAAUC	AAGGUAGAUAGAACAGGUCUUGU	-4.17	0.112157
AACACGUUUGAAAU	UUCCACCCUGUCUUUGAGCA	-3.89	0.111942
UUUAAUUUUUCACAAAUAUUAC	UGGGAAAGUGCUUUGACAUAGU	-4.01	0.111761
UAAUUCUUUCACAC	AUCACAUUGCCAGGGAUUACC	-4.08	0.11175
UUAGAUAUAUGAAUUCA	UUUUGCGAUGUGUUCCUAAUA	-3.4	0.111658
AUUUUUGUACUUGUUACU	UCUCACACAGAAAUCGCACCCG	-4.45	0.111641
UUGUGCAAACUUUA	CAGCGUGGGUUUGAACUGUGC	-4.08	0.111415
GAAAUUAAAUUGGCAAA	UGUUGAUCAGUUGUUGCCU	-3.46	0.111361
GAAAUUAAAUUGGCAAA	UGUUGAUCAGUUGUUGCCU	-3.46	0.111361
UAAUUCUUUCACAC	UGGUGACGCACCCCAGAAUUG	-3.83	0.111176
UUUGAUAAAAAUCUCUAUGA	UAGCUUAUCAGACUGAUGUUGA	-3.62	0.111145
UUAGAUAUAUGAAUUCA	AUUCCUUGGCUGUGUCUGAGCACC	-4.69	0.110953
CUUUAAUUUAACCGUUU	UGAGGUAGUAGGUUGUAUAGU	-4.59	0.110844
AUAAACCUAUUGUU	CUCCCACAUGCAGGGUUUGCA	-3.84	0.110791
UUACAAACAAUUUGAUACUU	UUAUAAAACAUCAAGUGAGAUG	-2.76	0.110666
UUAAAAAGUUGAAGAA	UUCCACCCUGUCUUUGAGCA	-3.84	0.110504
AUAAACCUAUUGUU	AACAUUCAUUGCUGUCGGUGGG	-3.94	0.110426
CACAUGCUUUUCCA	CAGUGCAAUGUUAAAAGGGCA	-3.58	0.110392
UCUUGUCUGUUAAUC	CGAGGACCAUCGGUUGGCGACU	-4.24	0.110216
UAAAAUGAAUUAUC	UCAUUUUCCCUUUCCCUCCAGC	-4.48	0.110209
AUACAAUGUAACAC	UCCUGUAUUGUGCUGCCCC	-4.13	0.110104
AUUUUUGUACUUGUUACU	AAGCAGAGAAGGGAGCGAAGCC	-4.72	0.1101
AUUUUUGUACUUGUUACU	AAGCAGAGAAGGGAGCGAAGCC	-4.72	0.1101
ACAACAUGUUAAAAACUGUUUA	UGGCAGUUGGACAUCGCCUGAGG	-4.44	0.11001
CACAAGUCAAACAAAUUUACAAA	AGAGGUAGUAGGUUGCAUAGU	-3.94	0.109902
UGUAUUAAUGCUAAC	UUAGGUGAUGCACCCUGGAAU	-3.28	0.109846
GCUCUCACUCAACAUGG	AUUGGCACUUUUUUGAGUGUG	-2.64	0.109817
AAUUUGCUGAUGAUU	AAGGUAGAUAGAACAGGUCUUGU	-4.08	0.109736
UUGUACUAAUUAUAUGCCUUAUUUCUU	CAGGCUAGGGGAGAUGACCGGAU	-4.94	0.109607
CUGUCUUUAUUUCACCUUAUAAUU	AGUGGGGAGGAUGUCUGGGCAGA	-5.25	0.109558
UAAUAUUACAAACU	UAUAUUCUGCUGUUUUGUGAGA	-3.43	0.109515
UAAUAUUACAAACU	UAUAUUCUGCUGUUUUGUGAGA	-3.43	0.109515
GAGAAUUUGACUAAAG	ACUGGACUUGGAGUCAGAAGGCC	-4.43	0.109491
GAAAUGAACGAAAUGU	UCAUUUUCCCUUUCCCUCCAGC	-4.45	0.109471
AAUUUGCUGAUGAUU	UCACGGCCGGCGGACUGCAUGC	-4.81	0.109418
AAAUGAUUGCUCAA	UGCCCCCUGGUAGUCGGUGUGU	-4.63	0.109405
GAAAUUAAAUUGGCAAA	UAGGUAGUUUCAUGUUGUUGGGA	-4.03	0.109333
AUUUUUGUACUUGUUACU	UGGUGACGCACCCAGAACCAGA	-4.16	0.109215
AUUGUUUUUAUGUGUGUU	AUGCUGAAUGACCUUGAGAGC	-3.95	0.109207
UUCCAAAAUCAUAA	UAGCAGCACAUCAUGGUUUACA	-3.94	0.109172
AAUUUGCUGAUGAUU	UGCCCCCUGGUAGUCGGUGUGU	-4.62	0.109168
CAAGCUUUGUUAAA	AUGCACCUGGGCAAGGAUUC	-3.78	0.108902
ACAACAUGUUAAAAACUGUUUA	UGGAGAGAAAGGCAGUUCCUGA	-4.13	0.108856
ACAACAUGUUAAAAACUGUUUA	UGGAGAGAAAGGCAGUUCCUGA	-4.13	0.108856
UGUAUUAAUGCUAAC	UGAGCUAAGUUGAUGGACAUAG	-3.79	0.108814
UGUAUUAAUGCUAAC	UAAAGUGCUUAUAGUGCAGGUAG	-3.66	0.108799
AAUUUGCUGAUGAUU	UUGGUGCUGUUAGUGGGUGCA	-3.94	0.10872
AACACGUUUGAAAU	UCUUUGGCCCCUUGAGUGUGG	-4.32	0.108679
UGUAUUAAUGCUAAC	ACAGUAGUCUGCACAUUGGUU	-3.5	0.108628
UGUAUUAAUGCUAAC	ACAGUAGUCUGCACAUUGGUU	-3.5	0.108628
CAAGCUUUGUUAAA	CGGGGGGUGGCGGGGAGGU	-5.07	0.108565
CUGUCUUUAUUUCACCUUAUAAUU	UGUAGAAUAAGUGGGAGGCCCC	-3.98	0.108447
AUUUUUGUACUUGUUACU	AGGUGACACACCCCGGAAUCG	-3.81	0.108393
UUAAAAAGUUGAAGAA	UCCACACAACCACAUUUGACUG	-3.99	0.108336
AUUGUUUUUAUGUGUGUU	UGACCUAUGAAUUGACAGACAGU	-3.94	0.108212
GAGAAUUUGACUAAAG	UGCCCAGGUCGGAAGGAGCUG	-4.04	0.108195
GAGAAUUUGACUAAAG	UGCCCAGGUCGGAAGGAGCUG	-4.04	0.108195
UCUUGAAACUGCUCAA	AGUAGUUAUUCUGCCUGCCAGU	-3.79	0.108193
UUGUGCAAACUUUA	UGUGCAAAUCUAUGCAAAACUGA	-3.11	0.107986
CUUUACUUGCUUUACA	GGGGGCGGGCGGGGCCGGAG	-4.93	0.107948
CCAAUGGAAAAACUCAA	UAGGUAGUUUCCUGUUGUUGGGA	-3.77	0.10793
UUAGAUAUAUGAAUUCA	UUCACAAGAAGGUGCCAUUCAUG	-3.96	0.107814
UUACAAACAAUUUGAUACUU	UUACAGUUGUUCAACCAGUUACU	-3.67	0.107783
UUUAUUACCCUGACA	UUAAUGCUAAUCGUGAUAGGGGU	-3.99	0.107576
ACAAUUGGAACUGUAACUUUG	GGUGGUUCAGUGGUAGAA	-3.45	0.107443
CGAAUACCAUAAUGAAU	UCCUGUAUUGUGCUGCCCC	-4.02	0.107171
UGUAUUAAUGCUAAC	CGAGGACCAUCGGUUGGCGACU	-4.12	0.107096
GAAAUUAAAUUGGCAAA	UAAUUUUAUGUAUAAGCUAGU	-2.7	0.107015
UUACAAACAAUUUGAUACUU	UCAAGUGUUCUAGUUCAGACA	-3.41	0.106964
CCAUACCCACAAAUUUUAC	UAUGGCACUGGUAGAAUUCACU	-3.92	0.106841
CUGUCUUUAUUUCACCUUAUAAUU	UGAGGUAGUAAGUUGUAUUGUU	-4.39	0.106838
CUGUCUUUAUUUCACCUUAUAAUU	UGAGGUAGUAAGUUGUAUUGUU	-4.39	0.106838
AUUGUUUUUAUGUGUGUU	AGGGUGAUGCAUCUGGAACCAGA	-4.24	0.106747
UCUUGAAACUGCUCAA	UCUUUGGCCCCUUGAGUGUGG	-4.24	0.106667
UUGUUAAAAUUUAUUG	UGAGGUAGUAAGUUGUAUUGUU	-3.92	0.106667
AAUCAUCAUCUAAA	GUGCAGAUCUUGGUGGUAGUAGCA	-4.51	0.106519
CGAAUACCAUAAUGAAU	UACGUCAUCGUUGUCAUCAUCA	-3.66	0.106457
ACAACAUGUUAAAAACUGUUUA	UAUCAGGCUUGGACAGGGGAC	-4.43	0.106363
AACACGUUUGAAAU	CAGCGUGGGUUUGAACUGUGC	-3.89	0.106226
AAUUUGCUGAUGAUU	AACAUUCAUUGCUGUCGGUGGG	-3.79	0.106222
CUUUAAUUUAACCGUUU	AUGGAUUAGACCCUGCUUCU	-3.45	0.106219
UUAAAAAUCUGAAUUCUUC	UACCCUGUAGAACCGAAUUUGU	-3.77	0.106108
UUGUUAAAAUUUAUUG	UUUGAUAAGCUGACAUGGGAC	-3.77	0.106108
AUUGUUUUUAUGUGUGUU	GCUGGAGGAGAUGGAGGCUC	-4.41	0.106061
UUUACUCAACCGCUACUUUAGAC	GAUCGGGCCUAAACAGGUAGU	-3.7	0.105956
CUUUACUUGCUUUACA	CAUAAAGUAGAAAGCACUACU	-2.55	0.105897
AUUGUUUUUAUGUGUGUU	UAAUUAAGGGUCAAAGUACACU	-3.4	0.105853
AUUGUUUUUAUGUGUGUU	UAAUUAAGGGUCAAAGUACACU	-3.4	0.105853
UCUUGUCUGUUAAUC	UGAGGUAGUAGAUUGUAUAGU	-3.44	0.105846
CUGUCUUUAUUUCACCUUAUAAUU	CACUAGAUUGUGAGCUCCUGGA	-4.02	0.105789
UUUGAUAAAAAUCUCUAUGA	GUGGGGGGCCGGGGUGGGG	-4.94	0.105646
ACAAUUGGAACUGUAACUUUG	UACCCAUUGCAUAUCGGAGUUG	-3.72	0.105592
UUGUGCAAACUUUA	UGUGCAAAUCCAUGCAAAACUG	-3.05	0.105536
UUGUGCAAACUUUA	UGUGCAAAUCCAUGCAAAACUG	-3.05	0.105536
UCUUGAAACUGCUCAA	CAUGCCUUGAGUGUAGGACCG	-3.96	0.105459
ACCAAACCAACCAUAUCCAA	UUGGGCGCUGGCAGUGGGUGU	-4.43	0.105426
UUACCCACUUACUAAA	CCAUGCAACAUUUUGGUGGUG	-3.35	0.105346
UUUUACAAUUAAUUG	AGAUCAGAAGGUGAUUGUGGCU	-3.82	0.105118
AUUUUUGUACUUGUUACU	AGGGGGAGGCGGGGAGGGGG	-5.43	0.105049
UUAAAAAUUACAGAA	UCCUUCUGUGGGGCGAUCGAU	-3.93	0.104856
AAUUUGCUGAUGAUU	UGCCCCCUGGUAGUCGGUGUGC	-4.34	0.104806
ACAAUUGGAACUGUAACUUUG	UAGCAGCACAUAAUGGUUUG	-3.27	0.10464
AUAAGAAACCUGCUUCAA	CAGGGCUGGGCUGGGUGGG	-4.57	0.104505
UUUACUCAACCGCUACUUUAGAC	CAGGGUACGAACGAUCUGGAGCU	-4.47	0.104317
AAUGGGUGAAUGAUUU	UCCUUCAUUCCACCGGAGUCUG	-4	0.104275
AAACUAUUUUUAGAGAUACU	UAGGUAGUUUCCUGUUGUUGGGA	-3.64	0.104208
AUUGUUUUUAUGUGUGUU	CAGGUGAUGCACCCCGGAAUCUGA	-4.21	0.104105
CUUUACUUGCUUUACA	GCGGGCGGGCGGGGCCGGGG	-4.71	0.104042
CAAGCUUUGUUAAA	UGUGACAGAUUGAUAACUGAAAGG	-3.78	0.103818
GAGAAUUUGACUAAAG	CCCCCUGGUGGUCAGUGCACA	-4.34	0.103728
AUAAACCUAUUGUU	CAUGGCGCCAUCAGUGGGUGC	-3.76	0.103524
AUACAAUGUAACAC	CAGUGCAAUGAUAUUGUCAAAGC	-3.19	0.103337
UAAAAUGAAUUAUC	UGAGGUAGUAGUUUGUACAGUU	-3.48	0.103233
AAUUUGCUGAUGAUU	UCUGCCCCCUGGUGGUCAGUG	-3.93	0.103068
UAAACAUAUAACUUCUA	CAUGGAGGUCUCUGUCUGGCU	-4.13	0.103018
UUAGAUAUAUGAAUUCA	AGUGGGGAGGAUGUCUGGGCAGA	-4.93	0.10288
UGUCACUAAGAAAUCU	UUCUUCCAGAGGUGAUGGAACU	-3.28	0.102821
CUUUACUUGCUUUACA	UUGGUGCUGUUAGUGGGUGCA	-3.72	0.102649
UUGUACUAAUUAUAUGCCUUAUUUCUU	GAGGAUCUCAGGAGGUAGUCU	-3.95	0.102597
UUAAAAAUCUGAAUUCUUC	UACCCUGUAGAUCCGAAUUUGU	-3.68	0.102564
CAAGCUUUGUUAAA	GGAGGCGGGGAGGGGGGUG	-4.9	0.102553
UUUGAUAAAAAUCUCUAUGA	UUAAUAUCGGACAACCAUUGU	-2.97	0.102484
AUUUUUGUACUUGUUACU	CAGUGCAAUAGUAUUGUCAAAGC	-3.22	0.102417
UAAACGAACAUGAAAAUU	GUCCAGUUUUCCCAGGAAU	-2.91	0.102357
UUUAAUUUUUCACAAAUAUUAC	GUGGGGGGCCGGGGUGGGG	-4.78	0.102224
GAGAAUUUGACUAAAG	AUGCACCUGGGCAAGGAUUCUGA	-4.16	0.102111
AAUUUGCUGAUGAUU	CGGUGGACCGUAGAGCAUGCGU	-4.2	0.102016
UUACAAACAAUUUGAUACUU	UUAAUAUCGGACAACCAUUGU	-2.95	0.101794
AAACUAUUUUUAGAGAUACU	GCUGGAGGAGAUGGAGGCUC	-4.23	0.101732
CACAUGCUUUUCCA	AAGCAGAGAAGGGAGCGAAGCC	-4.36	0.101703
CACAUGCUUUUCCA	AAGCAGAGAAGGGAGCGAAGCC	-4.36	0.101703
UAUUCUGUUAUUUACUUGUAC	UGGAUGAUGCACCCCGGAAU	-3.44	0.101625
AAAUGAUUGCUCAA	CCCCCUGGUGGUCAGUGCACA	-4.25	0.101577
UUUAUUACCCUGACA	UUAGGUGAUGCACCCUGGAAU	-3.03	0.101474
CUUUACUUGCUUUACA	UAGGUAGUUUCCUGUUGUUGGGA	-3.54	0.101346
CUUUAAUUUAACCGUUU	CGAGGACCAUCGGUUGGCAACC	-3.88	0.101147
CUUUAAUUUAACCGUUU	CGAGGACCAUCGGUUGGCAACC	-3.88	0.101147
AUUGUUUUUAUGUGUGUU	AGAGGUCUUCCAUGAUGCAUU	-3.47	0.101107
UCUUGAAACUGCUCAA	UUUCCUCAUAUUCAUUCAGGAGUG	-3.28	0.100892
UAAUUCUUUCACAC	GGAGGCGGGGAGGGGGGUG	-4.82	0.100879
AAAUGAUUGCUCAA	UGAGGUAGUAGUUUGUACAGUU	-3.4	0.10086
CACAUGCUUUUCCA	UGCCCUUAAAGGCACGAGAGGAC	-3.58	0.100703
CACAAGUCAAACAAAUUUACAAA	AAGUUGUUCGUGGUGGAUUCG	-3.5	0.100488
UAUUCUGUUAUUUACUUGUAC	UAGGUAGUUUCCUGUUGUUGGGA	-3.51	0.100487
UCUUGUCUGUUAAUC	AAAUUAGCAACUGUUGCAGAGC	-3.12	0.100418
AACACGUUUGAAAU	UUGCAGUAACAGGUGUGAACAUU	-3.49	0.100287
UAUUCUGUUAUUUACUUGUAC	UCAGAGGUCGAAUAGCCUGCU	-3.41	0.100206
ACAAUUGGAACUGUAACUUUG	UGAGGUAGUAGGUUGUAUGGUU	-4	0.10016
CACAUGCUUUUCCA	AGAGGUAGUAGGUUGCAUAGU	-3.59	0.100139
UAUUCUGUUAUUUACUUGUAC	ACAGACAGCAGGUGUGUGGGCU	-4.07	0.100074
UAUUCUGUUAUUUACUUGUAC	UAAGGCACGCGGUGAAUGCC	-3.05	0.100066
UAUUCUGUUAUUUACUUGUAC	UAAGGCACGCGGUGAAUGCC	-3.05	0.100066
UAUUGAAUAUCCUAUAA	UUGUUCAGCCGUUGCCUCUCUCU	-4.31	0.100046
AAUUUGCUGAUGAUU	GCGGGACUGGGCGAGUUGAGC	-4.26	0.100023
AAACUAUUUUUAGAGAUACU	UCCUGUUCUGAGCUGCCU	-3.49	0.0999141
UAAACGAACAUGAAAAUU	UAUGGCUUUUCAUUCCUAUGUGA	-3.4	0.0998825
UUAAAAAGUUGAAGAA	UGGGACUGCCAGUUUCGGCCU	-3.51	0.0998578
AUUGUUUUUAUGUGUGUU	UGAGAACUGAAUUCCAUAGGCUGU	-3.97	0.0996736
UUAAAAAGUUGAAGAA	AGAGGUAAAAAUUUGAUUUGACU	-3.02	0.09967
CUGUCUUUAUUUCACCUUAUAAUU	UGCCCUUAAAGGCACGAGAGGAC	-3.54	0.0995781
AUUUUUGUACUUGUUACU	UACAGUACUGUGAUAACUGAAG	-3.07	0.099546
AUUUUUGUACUUGUUACU	UACAGUACUGUGAUAACUGAAG	-3.07	0.099546
CUGUCUUUAUUUCACCUUAUAAUU	CACUGGGGUGCCUGGCCAGCCU	-4.21	0.0994567
UGUAUUAAUGCUAAC	AAGGGCUGUUUUGGUACCGGAAA	-3.79	0.099449
AUUUUUGUACUUGUUACU	AACUGGCCUACAAAGUCCCAGU	-3.05	0.0994457
UUGUACUAAUUAUAUGCCUUAUUUCUU	UUGCAGUAACAGGUGUGAACAUU	-3.46	0.0994253
UAUUCUGUUAUUUACUUGUAC	UGAGGUAGUAGGUUGUAUGGUU	-4	0.099359
AAAUGAUUGCUCAA	UAGGUAGUUUCAUGUUGUUGGGA	-3.66	0.0992946
AAAUGAUUGCUCAA	UUAAUGCUAAUCGUGAUAGGGGU	-3.68	0.0992181
UUGUUAAAAUUUAUUG	UCACAGUGAACCGGUCUCU	-3.43	0.0991043
CUGUCUUUAUUUCACCUUAUAAUU	UGUGUGGAACCAGAUGAAACU	-3.42	0.0990156
AUUGUUUUUAUGUGUGUU	AUGAGAUGCGCUCUGUCCAGGU	-4.04	0.0989711
GAAAUUAAAUUGGCAAA	UGUUGAUCAGCCGUUGCCU	-3.4	0.0989523
GAAAUUAAAUUGGCAAA	UGUUGAUCAGCCGUUGCCU	-3.4	0.0989523
AAUGGGUGAAUGAUUU	UGGCAGUUGGACAUCGCCUGAGG	-3.99	0.0988603
ACAAUUGGAACUGUAACUUUG	UAAAGUGCUUAUAGUGCAGGUAG	-3.32	0.098692
CACAAGUCAAACAAAUUUACAAA	UAUAUUCUGCUGUUUUGUGAGA	-3.09	0.098659
CACAAGUCAAACAAAUUUACAAA	UAUAUUCUGCUGUUUUGUGAGA	-3.09	0.098659
UCUUGUCUGUUAAUC	ACUUGGAUGGGAGACCGCC	-3.35	0.0985874
UUACAAACAAUUUGAUACUU	UACCCAUUGCAUAUCGGAGUUG	-3.47	0.0984956
UUGUUAAAAUUUAUUG	AAGGUAGAUAGAACAGGUCUUGU	-3.66	0.09844
UGUAUUAAUGCUAAC	CAAAGUGCUCAUAGUGCAGGUAG	-3.66	0.0984136
UAUUCUGUUAUUUACUUGUAC	GUGGGGGGCCGGGGUGGGG	-4.6	0.0983747
UCUUGAAACUGCUCAA	UGCCAUCAGUGGUUGUGAGCG	-3.49	0.0983376
UCUUGAAACUGCUCAA	UGCCAUCAGUGGUUGUGAGCG	-3.49	0.0983376
AUUGUUUUUAUGUGUGUU	UGAGAACUGAAUUCCAUGGGUU	-3.39	0.0983179
CUGUCUUUAUUUCACCUUAUAAUU	CCUGGGCCUCCCUCUUUGGGGUG	-4.14	0.0981973
UGUAUUAAUGCUAAC	GAGUAUUGUUUCUGCUGCCCGGG	-4.28	0.0981651
UUUAAUUUUUCACAAAUAUUAC	AGGUGGAGGCGGGGAGGGGGG	-5.15	0.0980952
AAACUAUUUUUAGAGAUACU	CACCCAGGUGUUUGUUGGAAUC	-3.48	0.0980558
AAACUAUUUUUAGAGAUACU	CACCCAGGUGUUUGUUGGAAUC	-3.48	0.0980558
AAACUAUUUUUAGAGAUACU	UAGGUAGUUUCAUGUUGUUGGGA	-3.61	0.0979381
AAUGGGUGAAUGAUUU	UCUUUGGUUAUCUAGCUGUAUGA	-3.46	0.0977954
AAUAAUUAAUCUUGUACAA	AGAUCAGAAGGUGAUUGUGGCU	-3.55	0.0976885
GAAAUUAAAUUGGCAAA	AACAUUCAUUGCUGUCGGUGGG	-3.48	0.0975336
CUUUACUUGCUUUACA	UGAGGCUCAGUGUAAGGGAACACU	-3.71	0.0975289
UUGUUAAAAUUUAUUG	UGAGGUAGUAAGUUGUAUUGUU	-3.92	0.0974894
UAUUCUGUUAUUUACUUGUAC	UGAGGUAGUAAGUUGUAUUGUU	-3.91	0.0974894
UAAUUCUUUCACAC	GGGGCCGGGGGUGGGGGU	-4.28	0.0974721
UAAUUCUUUCACAC	UGAGGGGCAGAGAGCGAGACU	-4.16	0.0973327
AUUGUUUUUAUGUGUGUU	CGCCAGCAGCUGGUGUGAGCAGU	-3.86	0.0972782
AUUGUUUUUAUGUGUGUU	UACCCAUUGCAUAUCGGAGUUG	-3.42	0.0970764
UUUAAUUUUUCACAAAUAUUAC	AGUGGGGAGGAUGUCUGGGCAGA	-4.65	0.0970367
AAUCAUCAUCUAAA	CCCCCUGGUGGUCAGUGCACA	-4.06	0.0970363
AAACUAUUUUUAGAGAUACU	GAGUAUUGUUUCUGCUGCCCGGG	-4.23	0.0970183
UAAUUCUUUCACAC	GGGGGCCGGGGAGGGGGC	-4.11	0.0970026
UAAUUCUUUCACAC	GGGGGCCGGGGAGGGGGC	-4.11	0.0970026
UUAAAAAGUUGAAGAA	UAUACCUCAGUUUUAACAGGUG	-2.77	0.0969548
UAAACAUAUAACUUCUA	CACCCAGGUGUUUGUUGGAAUC	-3.44	0.0969287
UAAACAUAUAACUUCUA	CACCCAGGUGUUUGUUGGAAUC	-3.44	0.0969287
UAAUUCUUUCACAC	AGGGGGAGGCGGGGAGGGGG	-5.01	0.096924
AUAAGAAACCUGCUUCAA	ACUGGACUUGGAGUCAGAAGGCC	-3.91	0.0966387
GAGAAUUUGACUAAAG	UGCCCCCUGGUAGUCGGUG	-3.53	0.0962377
GAGAAUUUGACUAAAG	UGCCCCCUGGUAGUCGGUG	-3.53	0.0962377
AUUUUUGUACUUGUUACU	UAUCAGGCUUGGACAGGGGAC	-4	0.0960384
AUUGUUUUUAUGUGUGUU	AUAGGUCAGGGCAUGUGCAGGA	-4.08	0.0957971
AAACUAUUUUUAGAGAUACU	UUUUGGUCCCAUGUCUAGAGCU	-3.4	0.0956669
UUUUACAAUUAAUUG	AGAUAUUGCACGGUUGAUCUCU	-3.44	0.0956618
UAAAAUGAAUUAUC	CAGCAGCAAUUCAUGUUUUGA	-2.9	0.0952694
GAAAUUAAAUUGGCAAA	AACAUUCAUUGUUGUCGGUGGG	-3.13	0.0952526
GAGAAUUUGACUAAAG	UUUGCAGGUUCGAUUCUGGUCA	-3.3	0.0952381
CAAGCUUUGUUAAA	AGGGGGAGGCGGGGAGGGGG	-4.92	0.0951828
UAACCUUAACUUGC	GAGAAGUUGGACUGCAAUGAGG	-3.71	0.0951282
CACAUGCUUUUCCA	UUGCAGUAACAGGUGUGAACAUU	-3.31	0.0951149
CUGUCUUUAUUUCACCUUAUAAUU	CACUGACCACCAGGGGGCAGC	-3.59	0.0950238
UUACAAACAAUUUGAUACUU	CACUAGAUUGUGAGCUCCUGGA	-3.61	0.095
AAUAAUUAAUCUUGUACAA	CAUGCCUUGAGUGUAGGACCG	-3.56	0.0948069
AUUUUUGUACUUGUUACU	UUCCGGAGUGCAUCACCUGAGA	-3.45	0.0947542
AUUUUUGUACUUGUUACU	UUCCGGAGUGCAUCACCUGAGA	-3.45	0.0947542
AUUUUUGUACUUGUUACU	UUCCGGAGUGCAUCACCUGAGA	-3.45	0.0947542
UUGUACUAAUUAUAUGCCUUAUUUCUU	UUAUAAAACAUCAAGUGAGAUG	-2.36	0.0946271
AACACGUUUGAAAU	UGGAGUGUGACAAUGGUGUUU	-3.27	0.0943451
AAUAAUUAAUCUUGUACAA	AUGGAUUAGACCCUGCUUCU	-3.06	0.0942118
CUUUACUUGCUUUACA	UAGGUAGUUUCAUGUUGUUGGGA	-3.47	0.09414
CUGUCUUUAUUUCACCUUAUAAUU	CCCUGGGGUGCCUGGCCAGCCU	-4.3	0.0940919
AAUAAUUAAUCUUGUACAA	AUCAUGUAUGAUACUGCAAACA	-2.88	0.0940255
UUUUACAAUUAAUUG	CAUGCCUUGAGUGUAGGACCG	-3.53	0.094008
AAUUUGCUGAUGAUU	UGUUGAUCAGUUGUUGCCU	-2.92	0.0939813
AAUUUGCUGAUGAUU	UGUUGAUCAGUUGUUGCCU	-2.92	0.0939813
UUACAAACAAUUUGAUACUU	CAGUGCAAUGAUAUUGUCAAAGC	-2.9	0.0939423
CUGUCUUUAUUUCACCUUAUAAUU	AGCAAGGAUGUCAAACUCG	-2.94	0.0939297
ACACCUAUCCUUCU	CAUGGCGCCAUCAGUGGGUGC	-3.41	0.0938877
GAAAUGAACGAAAUGU	CAAAGUGCUGUUCGUGCAGGU	-3.14	0.0938154
ACAAUUGGAACUGUAACUUUG	UAGCAGCACAUCAUGGUUUACA	-3.38	0.0936548
UGUAUUAAUGCUAAC	CGGGGACCAUCGGUUGGCGACU	-3.85	0.0936284
CUGUCUUUAUUUCACCUUAUAAUU	UGAGGGGCAGAGAGCGAGCCC	-3.45	0.093572
AAUCAUCAUCUAAA	CAGGGCUGGGCUGGGUGGG	-4.09	0.0935285
UCUUUACCAACCACCACAAACCUCUAU	AGUGGGGAGGAUGUCUGGGCAGA	-4.48	0.0934891
CUGUCUUUAUUUCACCUUAUAAUU	GAGAAGUUGGACUGCAAUGAGG	-3.64	0.0933333
UAUUCUGUUAUUUACUUGUAC	UAGGUAGUUUCAUGUUGUUGGGA	-3.44	0.0933261
UUUGAUAAAAAUCUCUAUGA	CGGGGCCGGGGGUGGGGA	-4.06	0.093269
UAAACAUAUAACUUCUA	UGCCAUCAGUGGUUGUGAGCG	-3.31	0.0932657
UAAACAUAUAACUUCUA	UGCCAUCAGUGGUUGUGAGCG	-3.31	0.0932657
GAAAUGAACGAAAUGU	CAAUGUUUCCACAGUGCAU	-2.65	0.0930804
UUAAAAAUUACAGAA	UAGGUAGUUUCAUGUUGUUGGGA	-3.43	0.0930548
UUAAAAAUCUGAAUUCUUC	UGAGGGGUGAUUAGGGCCAGC	-3.89	0.0928179
UUAAAAAUCUGAAUUCUUC	UGAGGGGUGAUUAGGGCCAGC	-3.89	0.0928179
UUAAAAAUCUGAAUUCUUC	UGAGGGGUGAUUAGGGCCAGC	-3.89	0.0928179
CAAGCUUUGUUAAA	UGGCAAGUAGGUGAUAGGAUGU	-3.67	0.0927002
UCUUGUCUGUUAAUC	CGAGGACCAUCGGUUGGCAACC	-3.55	0.0925443
UCUUGUCUGUUAAUC	CGAGGACCAUCGGUUGGCAACC	-3.55	0.0925443
AAAUGAUUGCUCAA	GCGGGACUGGGCGAGUUGAGC	-3.94	0.09251
CUUUACUUGCUUUACA	CGGGGGGUGGCGGGGAGGU	-4.32	0.0925054
CUUUACUUGCUUUACA	GAUCGGGCCUAAACAGGUAGU	-3.23	0.0924971
AAACUAUUUUUAGAGAUACU	GGUGGUUCAGUGGUAGAA	-2.97	0.0924945
UUAAAAAUUACAGAA	UAAUUUUAUGUAUAAGCUAGU	-2.33	0.0923504
CUUUACUUGCUUUACA	GAGGAUCUCAGGAGGUAGUCU	-3.55	0.0922078
CACAAGUCAAACAAAUUUACAAA	CCAAAUUCACGCAAGAUUUG	-2.46	0.0921694
CACAAGUCAAACAAAUUUACAAA	CCAAAUUCACGCAAGAUUUG	-2.46	0.0921694
CACAAGUCAAACAAAUUUACAAA	CCAAAUUCACGCAAGAUUUG	-2.46	0.0921694
AUUGUUUUUAUGUGUGUU	CGGGGUGGGGGCGGGGAGGC	-4.7	0.0919405
UAUUCUGUUAUUUACUUGUAC	AGGGGGAGGCGGGGAGGGGG	-4.75	0.091894
UUUUACAAUUAAUUG	UGUGUGGAACCAGAUGAAACU	-3.17	0.0917776
UUACAAACAAUUUGAUACUU	GAGUAUUGUUUCUGCUGCCCGGG	-4	0.0917431
GAAAUUAAAUUGGCAAA	AGGCAGUGUAGUUAGCUGAUU	-3	0.0917151
AUUUUUGUACUUGUUACU	UCACCCUGCAGAGAGAGGCC	-3.48	0.0916031
AUUUUUGUACUUGUUACU	UCACCCUGCAGAGAGAGGCC	-3.48	0.0916031
UUGUACUAAUUAUAUGCCUUAUUUCUU	CAGUGCAAUAGUAUUGUCAAAGC	-2.88	0.0916031
CAAGCUUUGUUAAA	AUGCACCUGGGCAAGGAUUCUGA	-3.73	0.0915562
UAUUCUGUUAUUUACUUGUAC	ACUUGCACCUGCUGAUGGCACU	-3.31	0.0914617
UAUUGAAUAUCCUAUAA	UGGAGUGUGACAAUGGUGUUU	-3.17	0.0914599
UUAAAAAUCUGAAUUCUUC	UUUCCUCAUAUUCAUUCAGGAGUG	-2.97	0.0913565
UUAGAUAUAUGAAUUCA	CAUGGAGGUCUCUGUCUGGCU	-3.66	0.0912946
UUUACUCAACCGCUACUUUAGAC	AAUGGCGCCACUAGGGUUG	-3.02	0.0912938
UUUUACAAUUAAUUG	CCAAACCAGUUGUGCCUGUAGC	-3.42	0.0910786
AACACGUUUGAAAU	UAUACCUCAGUUUUAACAGGUG	-2.6	0.0910046
AAAUGAUUGCUCAA	UGGAAGACUAGUGAUUUUGUUGUU	-3.28	0.0909343
AAAUGAUUGCUCAA	UGGAAGACUAGUGAUUUUGUUGUU	-3.28	0.0909343
AUUGUUUUUAUGUGUGUU	UACCCUGUAGAACCGAAUUUGU	-3.23	0.0909091
UAUUCUGUUAUUUACUUGUAC	AGGUGACGCACCCAGGAAUCGGG	-3.79	0.0908437
UAAUUCUUUCACAC	UGGGGCCGGGGGUGGGGG	-4.01	0.0908267
UUAAAAAUUACAGAA	AGGCAGUGUAGUUAGCUGAUU	-2.97	0.0907979
UUUUACAAUUAAUUG	AGCUGGUGUUGUGAAUCAGGCCG	-3.59	0.0907941
UCUUGUCUGUUAAUC	UGAGGAAGUAGAUUUUAUA	-2.31	0.0907662
UUUAUUACCCUGACA	CAGGUGAUGCACCCCGGAAUCUGA	-3.67	0.0907517
UUAAAAAUCUGAAUUCUUC	AUCACAUUGCCAGGGAUUACC	-3.31	0.0906601
CUUUAAUUUAACCGUUU	UGUUGAGGGUGAGCAAAAGUCA	-3.37	0.0905914
UUUUACAAUUAAUUG	AAUAAUACAUGGUUGAUCUU	-2.36	0.0904561
UAUUGAAUAUCCUAUAA	AGAGGUAAAAAUUUGAUUUGACU	-2.74	0.090429
UAUUCUGUUAUUUACUUGUAC	GGAGGCGGGGAGGGGGGUG	-4.32	0.0904144
UUUGAUAAAAAUCUCUAUGA	GGGGCCGGGGGUGGGGGU	-3.97	0.0904122
UUUACUCAACCGCUACUUUAGAC	CCCUGGGGUGCCUGGCCAGCCU	-4.13	0.090372
AUUUUUGUACUUGUUACU	AGGUGGAGGCGGGGAGGGGGG	-4.74	0.0902857
UUUAUUACCCUGACA	UAUGGCACUGGUAGAAUUCACU	-3.31	0.0902153
CAAGCUUUGUUAAA	AGGUGGAGGCGGGGAGGGGGG	-4.73	0.0900952
UUAAAAAGUUGAAGAA	UAAUUUUAUGUAUAAGCUAGU	-2.27	0.0899723
GAAAUUAAAUUGGCAAA	AACAUUCAACGCUGUCGGUGAGU	-3.2	0.0898876
GAAAUUAAAUUGGCAAA	AACAUUCAACGCUGUCGGUGAGU	-3.2	0.0898876
AAUAAUUAAUCUUGUACAA	UCUUUGGUUAUCUAGCUGUAUGA	-3.18	0.0898813
UGUCACUAAGAAAUCU	UGUUGUACUUUUUUUUUGUU	-2	0.0896057
UUUGAUAAAAAUCUCUAUGA	CACCCAGGUGUUUGUUGGAAUC	-3.18	0.0896027
UUUGAUAAAAAUCUCUAUGA	CACCCAGGUGUUUGUUGGAAUC	-3.18	0.0896027
AAAUGAUUGCUCAA	AGGCAGUGUAGUUAGCUGAUU	-2.92	0.0892693
UUGUUAAAAUUUAUUG	UUAUAAAGCAAUGAGACUGAUU	-2.7	0.0892562
UUUGAUAAAAAUCUCUAUGA	CGGGGUGGGGGCGGGGAGGC	-4.56	0.0892019
UAUUCUGUUAUUUACUUGUAC	UGGAGUGUGACAAUGGUGUUU	-3.09	0.0891518
AAACUAUUUUUAGAGAUACU	UGGAGUGUGACAAUGGUGUUU	-3.09	0.0891518
UUUAUUACCCUGACA	UUUGGCAAUGGUAGAACUCACA	-3.19	0.089131
UAUUCUGUUAUUUACUUGUAC	UAUGGCACUGGUAGAAUUCACU	-3.27	0.0891251
AUAAACCUAUUGUU	CAGUGCAAUAGUAUUGUCAAAGC	-2.8	0.0890585
UAUUCUGUUAUUUACUUGUAC	UGAGGUAGUAAGUUGUAUUGUU	-3.91	0.0890121
ACAACAUGUUAAAAACUGUUUA	UGAUGUAGUAGAUUGAAUAGU	-3.88	0.0890121
CUUUACUUGCUUUACA	CAGGGCUGGGCUGGGUGGG	-3.89	0.088955
UUACCCACUUACUAAA	AAGGGCUGUUUUGGUACCGGAAA	-3.39	0.088953
AAUUUGCUGAUGAUU	UUUGCAGGUUCGAUUCUGGUCA	-3.08	0.0888889
AUUGUUUUUAUGUGUGUU	CAUAAAGUAGAAAGCACUACU	-2.14	0.0888704
AAUAAUUAAUCUUGUACAA	UUUGGGUCCCUGUGCGGCUGCU	-3.8	0.0888266
AAAUGAUUGCUCAA	UGGCAGUUGGACAUCGCCUGAGG	-3.57	0.0884539
UAAUUCUUUCACAC	GGGGGGCCGGGGAGGGGGGC	-4.43	0.0881943
GCUCUCACUCAACAUGG	CUGCCCUGUGUUCUCUCCAGU	-3.43	0.0881295
CACAUGCUUUUCCA	GAGGAUCUCAGGAGGUAGUCU	-3.39	0.0880519
UUUAAUUUUUCACAAAUAUUAC	UGUAGAAUAAGUGGGAGGCCCC	-3.23	0.0880109
GAGAAUUUGACUAAAG	UGUGUAAUGGUUAGCACUCUGGACU	-3.56	0.0879012
AAUAAUUAAUCUUGUACAA	ACCACAGGGUAGAACCACGGACA	-3.58	0.0878743
GAGAAUUUGACUAAAG	GGCCAGCAGUCGGACAUCCCCA	-3.9	0.0877193
CACAUGCUUUUCCA	ACUUGGAUGGGAGACCGCC	-2.98	0.0876986
AUUGUUUUUAUGUGUGUU	ACUGAGACGACAGACUGCU	-2.93	0.0876458
UAAUUCUUUCACAC	CCGGGGGAGGCGGGGAGGGGU	-4.36	0.0874098
UUUAUUACCCUGACA	CACUGGGGUGCCUGGCCAGCCU	-3.7	0.0874085
[truncated: 797 more rows]

## Sheet: Analysis2 possible targets
miRNA sequence	Score	Target ID	Target name
UGGCAAGUAGGUGAUAGGAUGU	97	SGMS1	sphingomyelin synthase 1
UGGCAAGUAGGUGAUAGGAUGU	97	WASF1	WAS protein family member 1
UGGCAAGUAGGUGAUAGGAUGU	97	MAPK8	mitogen-activated protein kinase 8
UGGCAAGUAGGUGAUAGGAUGU	96	FRAT1	FRAT1, WNT signaling pathway regulator
UGGCAAGUAGGUGAUAGGAUGU	96	SEMA6D	semaphorin 6D
UGGCAAGUAGGUGAUAGGAUGU	95	FLOT1	flotillin 1
UGGCAAGUAGGUGAUAGGAUGU	94	RHOBTB1	Rho related BTB domain containing 1
UGGCAAGUAGGUGAUAGGAUGU	94	RAP1B	RAP1B, member of RAS oncogene family
UGGCAAGUAGGUGAUAGGAUGU	94	SGIP1	SH3 domain GRB2 like endophilin interacting protein 1
UGGCAAGUAGGUGAUAGGAUGU	94	ZC3H6	zinc finger CCCH-type containing 6
GGUGGUUCAGUGGUAGAA	99	KLHL42	kelch like family member 42
GGUGGUUCAGUGGUAGAA	98	CCR2	C-C motif chemokine receptor 2
GGUGGUUCAGUGGUAGAA	97	CASC4	cancer susceptibility 4
GGUGGUUCAGUGGUAGAA	96	TSG101	tumor susceptibility 101
GGUGGUUCAGUGGUAGAA	96	FAM126B	family with sequence similarity 126 member B
GGUGGUUCAGUGGUAGAA	96	CR2	complement C3d receptor 2
GGUGGUUCAGUGGUAGAA	96	SEC24B	SEC24 homolog B, COPII coat complex component
GGUGGUUCAGUGGUAGAA	95	BDNF	brain derived neurotrophic factor
GGUGGUUCAGUGGUAGAA	94	ADGRF5	adhesion G protein-coupled receptor F5
GGUGGUUCAGUGGUAGAA	94	SRSF6	serine and arginine rich splicing factor 6
UGAGGUAGUAGUUUGUACAGUU	99	HEATR5A	HEAT repeat containing 5A
UGAGGUAGUAGUUUGUACAGUU	99	MAP3K2	mitogen-activated protein kinase kinase kinase 2
UGAGGUAGUAGUUUGUACAGUU	97	TTC33	tetratricopeptide repeat domain 33
UGAGGUAGUAGUUUGUACAGUU	95	FRMPD4	FERM and PDZ domain containing 4
UGAGGUAGUAGUUUGUACAGUU	95	CADM2	cell adhesion molecule 2
UGAGGUAGUAGUUUGUACAGUU	94	ASF1A	anti-silencing function 1A histone chaperone
UGAGGUAGUAGUUUGUACAGUU	94	RAP1A	RAP1A, member of RAS oncogene family
UGAGGUAGUAGUUUGUACAGUU	93	ARID1B	AT-rich interaction domain 1B
UGAGGUAGUAGUUUGUACAGUU	92	TOB1	transducer of ERBB2, 1
UGAGGUAGUAGUUUGUACAGUU	92	NUP37	nucleoporin 37
AAGUUGUUCGUGGUGGAUUCG	98	ECHDC1	ethylmalonyl-CoA decarboxylase 1
AAGUUGUUCGUGGUGGAUUCG	96	BCOR	BCL6 corepressor
AAGUUGUUCGUGGUGGAUUCG	95	SASH1	SAM and SH3 domain containing 1
AAGUUGUUCGUGGUGGAUUCG	94	EDNRB	endothelin receptor type B
AAGUUGUUCGUGGUGGAUUCG	94	EXTL3	exostosin like glycosyltransferase 3
AAGUUGUUCGUGGUGGAUUCG	94	PDLIM5	PDZ and LIM domain 5
AAGUUGUUCGUGGUGGAUUCG	93	CELF4	CUGBP Elav-like family member 4
AAGUUGUUCGUGGUGGAUUCG	92	CLDN20	claudin 20
AAGUUGUUCGUGGUGGAUUCG	92	TRMT61B	tRNA methyltransferase 61B
AAGUUGUUCGUGGUGGAUUCG	91	STAM	signal transducing adaptor molecule
UGAGGAAGUAGAUUUUAUA	100	ZNF609	zinc finger protein 609
UGAGGAAGUAGAUUUUAUA	100	USB1	U6 snRNA biogenesis phosphodiesterase 1
UGAGGAAGUAGAUUUUAUA	99	STX5	syntaxin 5
UGAGGAAGUAGAUUUUAUA	98	GANAB	glucosidase II alpha subunit
UGAGGAAGUAGAUUUUAUA	98	PLCD4	phospholipase C delta 4
UGAGGAAGUAGAUUUUAUA	98	RAB6A	RAB6A, member RAS oncogene family
UGAGGAAGUAGAUUUUAUA	97	TOR1A	torsin family 1 member A
UGAGGAAGUAGAUUUUAUA	97	CARNS1	carnosine synthase 1
UGAGGAAGUAGAUUUUAUA	97	RTL5	retrotransposon Gag like 5
UGAGGAAGUAGAUUUUAUA	97	PLEK	pleckstrin
UUUGUUUCUGAAAUCUAGUUG	100	ZBTB20	zinc finger and BTB domain containing 20
UUUGUUUCUGAAAUCUAGUUG	100	XKR6	XK related 6
UUUGUUUCUGAAAUCUAGUUG	100	SSPN	sarcospan
UUUGUUUCUGAAAUCUAGUUG	100	RORA	RAR related orphan receptor A
UUUGUUUCUGAAAUCUAGUUG	100	ITGA4	integrin subunit alpha 4
UUUGUUUCUGAAAUCUAGUUG	100	HTR2C	5-hydroxytryptamine receptor 2C
UUUGUUUCUGAAAUCUAGUUG	100	DAPP1	dual adaptor of phosphotyrosine and 3-phosphoinositides 1
UUUGUUUCUGAAAUCUAGUUG	100	BCAT1	branched chain amino acid transaminase 1
UUUGUUUCUGAAAUCUAGUUG	100	MDGA2	MAM domain containing glycosylphosphatidylinositol anchor 2
UUUGUUUCUGAAAUCUAGUUG	100	LRRTM3	leucine rich repeat transmembrane neuronal 3
CGGGGGGUGGCGGGGAGGU	99	NFIC	nuclear factor I C
CGGGGGGUGGCGGGGAGGU	98	FXR2	FMR1 autosomal homolog 2
CGGGGGGUGGCGGGGAGGU	97	TUBB4A	tubulin beta 4A class IVa
CGGGGGGUGGCGGGGAGGU	97	ZBTB7A	zinc finger and BTB domain containing 7A
CGGGGGGUGGCGGGGAGGU	96	CBX6	chromobox 6
CGGGGGGUGGCGGGGAGGU	94	MYOG	myogenin
CGGGGGGUGGCGGGGAGGU	92	MECP2	methyl-CpG binding protein 2
CGGGGGGUGGCGGGGAGGU	91	MCMDC2	minichromosome maintenance domain containing 2
CGGGGGGUGGCGGGGAGGU	91	ELL2	elongation factor for RNA polymerase II 2
CGGGGGGUGGCGGGGAGGU	91	PHB	prohibitin
AGAGGUAGUAGGUUGCAUAGU	100	TRIM71	tripartite motif containing 71
AGAGGUAGUAGGUUGCAUAGU	100	HMGA2	high mobility group AT-hook 2
AGAGGUAGUAGGUUGCAUAGU	100	LIN28B	lin-28 homolog B
AGAGGUAGUAGGUUGCAUAGU	100	IGF2BP1	insulin like growth factor 2 mRNA binding protein 1
AGAGGUAGUAGGUUGCAUAGU	100	STARD13	StAR related lipid transfer domain containing 13
AGAGGUAGUAGGUUGCAUAGU	100	PRTG	protogenin
AGAGGUAGUAGGUUGCAUAGU	99	C14orf28	chromosome 14 open reading frame 28
AGAGGUAGUAGGUUGCAUAGU	99	IGDCC3	immunoglobulin superfamily DCC subclass member 3
AGAGGUAGUAGGUUGCAUAGU	99	ARID3B	AT-rich interaction domain 3B
AGAGGUAGUAGGUUGCAUAGU	99	NR6A1	nuclear receptor subfamily 6 group A member 1
UGAGGUAGUAGAUUGUAUAGU	100	TRIM71	tripartite motif containing 71
UGAGGUAGUAGAUUGUAUAGU	100	HMGA2	high mobility group AT-hook 2
UGAGGUAGUAGAUUGUAUAGU	100	LIN28B	lin-28 homolog B
UGAGGUAGUAGAUUGUAUAGU	100	IGF2BP1	insulin like growth factor 2 mRNA binding protein 1
UGAGGUAGUAGAUUGUAUAGU	100	STARD13	StAR related lipid transfer domain containing 13
UGAGGUAGUAGAUUGUAUAGU	100	PRTG	protogenin
UGAGGUAGUAGAUUGUAUAGU	100	ARID3B	AT-rich interaction domain 3B
UGAGGUAGUAGAUUGUAUAGU	100	IGDCC3	immunoglobulin superfamily DCC subclass member 3
UGAGGUAGUAGAUUGUAUAGU	100	C14orf28	chromosome 14 open reading frame 28
UGAGGUAGUAGAUUGUAUAGU	100	NR6A1	nuclear receptor subfamily 6 group A member 1
ACAAUUCUGUGUAUCUGAUC	97	CHCHD2	coiled-coil-helix-coiled-coil-helix domain containing 2
ACAAUUCUGUGUAUCUGAUC	97	FAM91A1	family with sequence similarity 91 member A1
ACAAUUCUGUGUAUCUGAUC	97	FAT4	FAT atypical cadherin 4
ACAAUUCUGUGUAUCUGAUC	96	RAB11FIP2	RAB11 family interacting protein 2
ACAAUUCUGUGUAUCUGAUC	96	LGALSL	galectin like
ACAAUUCUGUGUAUCUGAUC	95	UBE2K	ubiquitin conjugating enzyme E2 K
ACAAUUCUGUGUAUCUGAUC	95	ZPLD1	zona pellucida like domain containing 1
ACAAUUCUGUGUAUCUGAUC	94	GAS1	growth arrest specific 1
ACAAUUCUGUGUAUCUGAUC	93	USP38	ubiquitin specific peptidase 38
ACAAUUCUGUGUAUCUGAUC	93	LMO3	LIM domain only 3
AGAGGUAAAAAUUUGAUUUGACU	100	STARD13	StAR related lipid transfer domain containing 13
AGAGGUAAAAAUUUGAUUUGACU	100	ACVR1B	activin A receptor type 1B
AGAGGUAAAAAUUUGAUUUGACU	100	CCND2	cyclin D2
AGAGGUAAAAAUUUGAUUUGACU	99	USP44	ubiquitin specific peptidase 44
AGAGGUAAAAAUUUGAUUUGACU	99	FIGN	fidgetin, microtubule severing factor
AGAGGUAAAAAUUUGAUUUGACU	99	LPGAT1	lysophosphatidylglycerol acyltransferase 1
AGAGGUAAAAAUUUGAUUUGACU	99	PRTG	protogenin
AGAGGUAAAAAUUUGAUUUGACU	99	RAB8B	RAB8B, member RAS oncogene family
AGAGGUAAAAAUUUGAUUUGACU	99	SLC16A9	solute carrier family 16 member 9
AGAGGUAAAAAUUUGAUUUGACU	98	ONECUT2	one cut homeobox 2
GGGGCCGGGGGUGGGGGU	97	GNG13	G protein subunit gamma 13
GGGGCCGGGGGUGGGGGU	83	SIX5	SIX homeobox 5
GGGGCCGGGGGUGGGGGU	81	KMT2D	lysine methyltransferase 2D
GGGGCCGGGGGUGGGGGU	78	AKT1S1	AKT1 substrate 1
GGGGCCGGGGGUGGGGGU	78	BMP1	bone morphogenetic protein 1
GGGGCCGGGGGUGGGGGU	77	SBF1	SET binding factor 1
GGGGCCGGGGGUGGGGGU	77	H2AFB2	H2A histone family member B2
GGGGCCGGGGGUGGGGGU	77	MIEF2	mitochondrial elongation factor 2
GGGGCCGGGGGUGGGGGU	76	GOLGA6L1	golgin A6 family-like 1
GGGGCCGGGGGUGGGGGU	76	CNBD2	cyclic nucleotide binding domain containing 2

## Sheet: Analysis3-mirBase-Energy
SARS-CoV-2 UCR	miRNA sequence	Interaction energy	Interaction energy/ best possible interaction energy
GCUCUCACUCAACAUGG	AAUUUCCCGUGUUGAGUGG	-19.24	0.627323
AUCCAUCAAAACCA	UUUUUUUAGGUUUUGAUU	-11.26	0.609967
UUGUACUAAUUAUAUGCCUUAUUUCUU	ACUGGCGUAUAGUUGGUAA	-16.03	0.585892
UCUUUACCAACCACCACAAACCUCUAU	GUGUGGUUGGUUGGUGGUUG	-21.98	0.584886
ACCAAACCAACCAUAUCCAA	AGUGGUUGGUUUGGUGCUGUC	-22.23	0.581785
UUACAAACAAUUUGAUACUU	CUUAUCAGAUUGUAUUGUAAU	-15.33	0.574803
AAUAAUUAAUCUUGUACAA	UUUGUACAAUAUUAAUAUUU	-11.02	0.570984
AUAAGAAACCUGCUUCAA	UGAGGUAGUAGUUUCUU	-13.99	0.570555
CACAUGCUUUUCCA	CUUGGAAAUGCAUGUGCUUU	-16.81	0.569831
ACUCAAUUACCCCCUGCA	GGUGGGGGGUGUUGUUUU	-19.24	0.568558
AAAGAACUUCACAACUGCUC	GUUGUGUUGUUUUUUUUUGU	-13.52	0.568306
CCAUACCCACAAAUUUUAC	GGGAAAAUGUGGGUGUGGU	-19.98	0.566327
AAUGGGUGAAUGAUUU	AUCAUUCACGCAAAAAUGAUU	-12.11	0.557807
UUACAAACAAUUUGAUACUU	CUUAUCAGAUUGUAUUGUAAUU	-15.27	0.555273
UCUUUACCAACCACCACAAACCUCUAU	UGUGGUUAAGUUGGUGCA	-16.22	0.549644
GAAGAGCAACCAAUG	GGUUGUUUUUUUUCUUUUUC	-12.85	0.549615
CACAAGUCAAACAAAUUUACAAA	GUGAGUUUGUUGUAUUGUGGU	-17.98	0.54717
UUGUACUAAUUAUAUGCCUUAUUUCUU	UCAGAUAAGGUAUUUAAUUUU	-13.49	0.546154
AUCCAUCAAAACCA	UGAUUUUUUUGAUGGAAUU	-11.65	0.545667
ACCAAACCAACCAUAUCCAA	UGGGUAUCUGGAUGUGGUUGG	-21.69	0.543882
ACCAAACCAACCAUAUCCAA	GUGUGGUUGGUUGGUGGUUG	-20.28	0.539649
CUGUCUUUAUUUCACCUUAUAAUU	UGAGGGAAAUGAAGACGACGA	-20.03	0.538731
CCAUACCCACAAAUUUUAC	AGAAUUUGUGGGAAUGGGCUGA	-20.84	0.538084
UUGUACUAAUUAUAUGCCUUAUUUCUU	UGAGGUAGUAGUUAGAA	-13.88	0.536944
ACUCAAUUACCCCCUGCA	GUUGCUUGGGGGUAUUAU	-15.65	0.535043
UUUACUCAACCGCUACUUUAGAC	UAAAAGUUUGGUUGGGUUUUU	-14.78	0.533189
CACAUGCUUUUCCA	UAUGGGAAAAGCAGGUGAAA	-17.34	0.532883
UCUUGAAACUGCUCAA	UGAGCAAAGUUUCAAGUGUA	-15.44	0.53223
ACAAUUGGAACUGUAACUUUG	UUGAACAGUUUCAAUUUGUU	-11.66	0.532177
CUGUCUUUAUUUCACCUUAUAAUU	UCAGGAGUAAAGACAGAGU	-16.97	0.530478
UCUUUACCAACCACCACAAACCUCUAU	CGAGGCGUGGUGGGCGGUAAUAU	-23.26	0.529238
CUUUACUUGCUUUACA	UAUAAGCAAGUAGAAUUUAAU	-13.22	0.526693
GCUCUCACUCAACAUGG	CUCAAAUGUUGAGCGAGAC	-14.36	0.523705
UCUUUACCAACCACCACAAACCUCUAU	CUUGUUUGUGGUGAUGUCU	-16.02	0.523529
CCAUACCCACAAAUUUUAC	AUUUGAUUAUUUUGUGGGU	-12.77	0.52165
GCUCUCACUCAACAUGG	UCACACCCAGGUUGAGUGAGU	-16.67	0.5198
UUGUACUAAUUAUAUGCCUUAUUUCUU	UGAAGUAAGGUAGAUUAGUAAGGU	-19.39	0.519143
AAUUUGCUGAUGAUU	AUCAAGAUCGUUAGUAAGUU	-14.37	0.516535
UCUUGAAACUGCUCAA	AAGUUUUAUUGCAGUUUUAAG	-13.02	0.516462
CUGUCUUUAUUUCACCUUAUAAUU	AUAGGGUGGAUCUGAGGCAGAA	-20.21	0.516352
GCUCUCACUCAACAUGG	GUGAGUGAGAGCGAGUUCCAAU	-20.2	0.515175
ACUCAAUUACCCCCUGCA	UGCAGGGGGUGGUUGCACACGGA	-22.99	0.513973
UUUACUCAACCGCUACUUUAGAC	UGAGGUAGUGGUUGUAAUAGCU	-18.73	0.512309
UUACAAACAAUUUGAUACUU	CUUAUCAGAUUGUAUUGUAACU	-15.2	0.511957
AAAGAACUUCACAACUGCUC	UUAUUUUUGUAGAAGUUUUUU	-10.92	0.510758
ACUCAAUUACCCCCUGCA	UGGUGUGCAGGGGGUGGAAUA	-21.68	0.510478
ACUCAAUUACCCCCUGCA	UUAAAGCAGGGGGUCUAGUAGU	-19.9	0.509995
GAAGAGCAACCAAUG	UUUGUGUUGUUUUUUGUUUU	-11.27	0.509955
ACCAAACCAACCAUAUCCAA	GUGGGUAUCUGGAUGUGGUUGG	-21.67	0.509044
UCUUUACCAACCACCACAAACCUCUAU	AGGGUGUACGUGGUGGUCUGGUA	-23.22	0.50843
CUGUCUUUAUUUCACCUUAUAAUU	AAAGGUGUUAAAUGAAGACUUAG	-15.41	0.507576
UUUACUCAACCGCUACUUUAGAC	CGUCAAAGUGGUGGUGAUUUG	-17.55	0.507519
AUCCAUCAAAACCA	AUUUUUUUAGGUUUUGAUUUUU	-11.21	0.506552
AAUGGGUGAAUGAUUU	UCUAAUUAUUCACCAAGUAAA	-13.3	0.505511
ACUCAAUUACCCCCUGCA	UAAAUGCAGGGGCAAAAUGAU	-15.42	0.504086
GCUCUCACUCAACAUGG	UAAUACGUGAUAGUGAGAGUG	-16.48	0.503976
UCUUGUCUGUUAAUC	UAAAAGUUAAGAGACAAGUUA	-13.33	0.503019
GAAGAGCAACCAAUG	GUUGUGUUGUUUUUUUUUGU	-11.96	0.502732
ACAACAUGUUAAAAACUGUUUA	UAAGUUGUAAUAUGUUGUGU	-13.07	0.50192
UCUUGAAACUGCUCAA	UUGAACAGUUUCAAUUUGUU	-10.99	0.501597
AUCCAUCAAAACCA	UGAGAACUGGUUUUGAUGGACU	-17.84	0.501405
UUUACUCAACCGCUACUUUAGAC	ACUGAAGUAGAGAUUGGGUUU	-16.39	0.50107
UCUUUACCAACCACCACAAACCUCUAU	UGGGGUCACAGGGUGGUUGGC	-22.11	0.500453
AAUUUGCUGAUGAUU	UUUGAUCAUCAGUAAGUGAGAU	-15.05	0.499171
ACUCAAUUACCCCCUGCA	AAGGGGGUGAAAAGAUUCAAA	-15.24	0.498528
UUACAAACAAUUUGAUACUU	CUUAUCAGGUUGUAUUGUAAUU	-14.6	0.497784
CUGUCUUUAUUUCACCUUAUAAUU	AGGAGAAGUAAAGUAGAA	-13.22	0.496992
UUUACUCAACCGCUACUUUAGAC	UGACUAGGGUAGUAUGAGUAGA	-18.49	0.496909
ACACCUAUCCUUCU	UGAGGGAGUUGGGUGUAUA	-17.15	0.496382
ACUCAAUUACCCCCUGCA	CUGGCAGGGGGAGAGGUA	-19.38	0.496033
ACCAAACCAACCAUAUCCAA	AGGUUGUUUGGUUUUGUUUU	-13.28	0.495892
UCUUUACCAACCACCACAAACCUCUAU	GGUUGUGUGGUUGUGUGUGU	-17.89	0.495705
UCUUUACCAACCACCACAAACCUCUAU	UAAGUAAUCGGUGGUUGGCG	-16.92	0.495461
UUUACUCAACCGCUACUUUAGAC	UGAGGUAGUAGGUUGUGUGGU	-19.1	0.49546
UUUACUCAACCGCUACUUUAGAC	UGAGGUAGUCGGUUGUAAAGA	-17.44	0.495173
AAAGAACUUCACAACUGCUC	UUUGUGUUGUUUUUUGUUUU	-10.93	0.49457
UCUUUACCAACCACCACAAACCUCUAU	AGUGGGUGGUGUGGUAAGAUU	-18.87	0.494367
UCUUUACCAACCACCACAAACCUCUAU	UUGUGAUUUGGUUGGAAUAUC	-15.09	0.493137
AUCCAUCAAAACCA	GUUUUUUUAGGUUUUGAUUUU	-11.25	0.492341
UUUACUCAACCGCUACUUUAGAC	AGGUAGUUGGUUGUGUUG	-14.53	0.49121
UUUACUCAACCGCUACUUUAGAC	AAAGAAGGGUAGGAGUUGAGUA	-18.33	0.490369
CACAAGUCAAACAAAUUUACAAA	CUAAGUUUGUUUGAAGCA	-11.48	0.489761
CUGUCUUUAUUUCACCUUAUAAUU	AAGGGUGUUAAAUGAAGACUUAA	-15.18	0.48952
UCUUUACCAACCACCACAAACCUCUAU	CGUGAGUGGUGGGGUAAGAUA	-19.35	0.489254
CACAAGUCAAACAAAUUUACAAA	AAAAAAGUUUGUUUGGGUUUU	-12.18	0.488372
UUAAAAAUCUGAAUUCUUC	CAGAUUUCGGAUUUUUUGUA	-12.82	0.488195
UUUAAUUUUUCACAAAUAUUAC	UAUGAUUGGUGUUUGUGAAAAGU	-16.12	0.488189
CACAUGCUUUUCCA	UUCGUCGGAGAAGCAUGUUGC	-17.4	0.487258
UAAACAUAUAACUUCUA	AGGUUGUGUGUUUAUUCUUU	-13.37	0.48689
UUUACUCAACCGCUACUUUAGAC	UGAGGUAGUAGGUUGUAUAG	-15.96	0.486437
CCAUACCCACAAAUUUUAC	UGAAGUAGAAUAGUUGGGUAUGGU	-19.23	0.485361
UUUGAUAAAAAUCUCUAUGA	AAUGUAGAGAUUGAUCAAAAU	-13.04	0.4853
AAUUUGCUGAUGAUU	AAUUUUAUCAUCAAGCAAUAU	-11.99	0.484053
UUUACUCAACCGCUACUUUAGAC	UGAGGUAGUAGGUUGUGUGGUU	-19.08	0.483896
CUGUCUUUAUUUCACCUUAUAAUU	AAGGGUGUUAAAUGAAGACUUAU	-15.17	0.483583
UUUACUCAACCGCUACUUUAGAC	GUAGCGGUAUAUAAGGUUA	-13.74	0.482783
ACACCUAUCCUUCU	AAUGGAAGGGUAGGAAAGAAG	-17.08	0.482759
UCUUUACCAACCACCACAAACCUCUAU	UCCUGUGGUGUUUGGUGUGGUU	-19.39	0.482098
UUAGAUAUAUGAAUUCA	UAUUAUGUCAUAUAUUUAG	-10.03	0.481748
UGUCACUAAGAAAUCU	AAUCUGUUUGUCUUAGUGACA	-12.31	0.481612
CUGUCUUUAUUUCACCUUAUAAUU	AUGGGGUGGAUCUGAGGCAGAA	-19.81	0.481526
UUUACUCAACCGCUACUUUAGAC	UGAGGUAGUCGGUUGUAUUGUU	-17.34	0.481266
AAAGAACUUCACAACUGCUC	UAGUGGUUGUGAAUUUACCUU	-13.73	0.481079
ACAAUUGGAACUGUAACUUUG	AAAAGUUUGUUCCAGUUUUUCU	-13.85	0.48107
UUGUACUAAUUAUAUGCCUUAUUUCUU	UAAUGCGUGUAAUAAGUACUGU	-14.98	0.48059
UUACCCACUUACUAAA	GAGGUAGUAGGUGGUAU	-14.3	0.479866
UCUUUACCAACCACCACAAACCUCUAU	UGAGGUAGUCGGUUGUAAAGA	-16.89	0.479557
UUGUACUAAUUAUAUGCCUUAUUUCUU	AUAUAAUCGGCAUAUAACC	-11.55	0.478856
UCUUUACCAACCACCACAAACCUCUAU	UGGGAGGUAGCAGUGGUGGUGA	-21.83	0.478728
UCUUUACCAACCACCACAAACCUCUAU	GUGGGGUAAUGGUGGAGUACA	-18.97	0.477954
UUUACUCAACCGCUACUUUAGAC	AGUGGGGGUUGGGGUAUAUAU	-18.59	0.477401
UUUACUCAACCGCUACUUUAGAC	AAAAGUUUGGUUGGGUUUUUCU	-14.72	0.477302
GCUCUCACUCAACAUGG	UCACACCCAGGUUGAGUGAGUC	-16.67	0.476831
ACCAAACCAACCAUAUCCAA	UUGUGAUUUGGUUGGAAUAUC	-14.59	0.476797
UUGUACUAAUUAUAUGCCUUAUUUCUU	UGAGGUAGUAGUUUGUACAGU	-15.66	0.476712
AUUUUUGUACUUGUUACU	AGAUUGACGAGUGCAAGAAGA	-16.74	0.476651
AUUGUUUUUAUGUGUGUU	CAAAAAACACAUAUGAAACUG	-12.94	0.476436
AAAGAACUUCACAACUGCUC	UGGAAUGUUGUGAAGUAUGU	-14.53	0.476237
ACAAUUGGAACUGUAACUUUG	AGAUCAUGUUGCAGUUUCAUC	-15.61	0.47606
UCUUGUCUGUUAAUC	UAUUUUGCCUAUUUAACAGACA	-11.89	0.475981
UUUACUCAACCGCUACUUUAGAC	CGUCAAAGUGGUGGGUGAUUUG	-18.08	0.475539
CCAUACCCACAAAUUUUAC	UUGAGAAUUUGUGGGCGGUAA	-16.74	0.475028
GCUCUCACUCAACAUGG	AACACCAUGUUGUGCUUGAGC	-15.39	0.474707
UUGUACUAAUUAUAUGCCUUAUUUCUU	UGAGGUAGUAGUUUGUAUAG	-14.42	0.474498
GAGAAUUUGACUAAAG	UCAAGUUCUCAUAAUUCAAAA	-12.72	0.474273
UUUACUCAACCGCUACUUUAGAC	UGAGGUAGUUGGUUGUAUAGU	-16.19	0.474224
CCAAUGGAAAAACUCAA	GUGGGUUUUUUCAAAAUUUUUU	-11.83	0.473769
AUCCAUCAAAACCA	GUUUUUUUAGGUUUUGAUUUUU	-11.24	0.473463
UCUUUACCAACCACCACAAACCUCUAU	CGUGGUGGUGGGGGUGGGG	-21.27	0.472982
UUUACUCAACCGCUACUUUAGAC	UGAGGUAGGAGGUUGUGUG	-16.89	0.47258
UUAAAAAGUUGAAGAA	UUGUCAACUUUUUAACUUACU	-11.61	0.472335
GCUCUCACUCAACAUGG	GGGUGAGGGCAGGUGGUU	-18.24	0.472172
UCUUUACCAACCACCACAAACCUCUAU	GUAGGUUUUGUGGUUUUGUU	-13.68	0.47205
CACAAGUCAAACAAAUUUACAAA	UUGGUUUGUGAGUUUGUUUUUA	-13.83	0.472014
UUGUACUAAUUAUAUGCCUUAUUUCUU	UGAGGUAUCUUAGUUAGACAGA	-15.43	0.47201
UUUACUCAACCGCUACUUUAGAC	UGAGGUAGUAGUUAGAA	-12.2	0.471954
UUGUACUAAUUAUAUGCCUUAUUUCUU	UAGGUAGGAGAAAUAAGGU	-14.2	0.471918
ACAACAUGUUAAAAACUGUUUA	UAGACGGUUUGAAACAUGGA	-14.96	0.471478
UUGUACUAAUUAUAUGCCUUAUUUCUU	AGAGAAUAGGGCAUGGGUACU	-18.09	0.469992
ACACCUAUCCUUCU	GAAAUCAAGGAUGGGUGAAGC	-17.11	0.469926
AAAGAACUUCACAACUGCUC	ACUCUCAAAGUGGUUGUGAAA	-14.6	0.469755
UCUUUACCAACCACCACAAACCUCUAU	GUGUGGUGGUGGUGGCGGC	-19.11	0.469649
UGUCACUAAGAAAUCU	UAUGAUAGUAUUCUUGGUGACA	-15.37	0.4696
UUUACUCAACCGCUACUUUAGAC	UAGGUAGUUUAAAGUUGUGG	-13.91	0.468982
UCUUUACCAACCACCACAAACCUCUAU	UAUUGUUCUGUGGUUGGUUUCG	-16.46	0.468545
UGUCACUAAGAAAUCU	UGGGGUUUCUUAGCGGCAUUU	-16.92	0.468179
UUUACUCAACCGCUACUUUAGAC	UGAGGUAGUAGGUUGUAUAGU	-16.15	0.468116
AUUGUUUUUAUGUGUGUU	AGAGUACGCAAAAAAACAAUU	-12.74	0.468038
UUUACUCAACCGCUACUUUAGAC	UGAGGUAGUGGAUUCUGU	-14.25	0.46798
AUAAGAAACCUGCUUCAA	AAUGGAUUUUUGGAGCAGG	-14.31	0.4678
ACCAAACCAACCAUAUCCAA	UGUGGAUAUAGGAGGGUUAGG	-18	0.467532
AAUGGGUGAAUGAUUU	UAUCUCACAUUCAUCCGUAUUU	-14.93	0.467146
ACUCAAUUACCCCCUGCA	GUGGGGGCGAAGAUUGGGUU	-18.52	0.466264
UUGUACUAAUUAUAUGCCUUAUUUCUU	UUUCUAGAGAUGAGCAUAUAU	-14.11	0.465984
ACCAAACCAACCAUAUCCAA	UAUUGUUCUGUGGUUGGUUUCG	-16.37	0.465983
UUUACUCAACCGCUACUUUAGAC	UGAGGUAGUAGGUUGUAUAGUA	-16.61	0.464485
CACAAGUCAAACAAAUUUACAAA	AAAAAAGUUUGUUUGGGUUUUU	-11.83	0.464468
CUGUCUUUAUUUCACCUUAUAAUU	GUUGAGGCGAGUUGAAGACU	-16.36	0.464113
UUUACUCAACCGCUACUUUAGAC	UGAGGUAGUAGGUUGUUUAGUU	-16.15	0.46408
ACCAAACCAACCAUAUCCAA	UGAUAUGUUUGGUUUAUUGGUGA	-15.58	0.463967
UCUUUACCAACCACCACAAACCUCUAU	UGGGUUUGUAAUGUGGUCAUG	-16.09	0.463956
ACAAUUGGAACUGUAACUUUG	UAAAGUUAUGGUACCGAAGUUA	-14.69	0.463846
CACAUGCUUUUCCA	AAGGAGUGGCAUGUGAACACA	-16.28	0.463818
GCUCUCACUCAACAUGG	UGUUGGUGAGAGUUCGAUUCUC	-14.91	0.463764
UUGUACUAAUUAUAUGCCUUAUUUCUU	UGAGGUAGUAGUUUGUACAGUU	-15.63	0.463661
CCAUACCCACAAAUUUUAC	AAAAAAGUUUGUUUGGGUUUU	-11.56	0.463512
UCUUUACCAACCACCACAAACCUCUAU	AAUUGGUGGUACUUGAGGA	-14.66	0.463338
ACCAAACCAACCAUAUCCAA	GGACAUGGGUUGGUUUGCAAGA	-18.26	0.463334
UUUACUCAACCGCUACUUUAGAC	UGUGUGAAGUAGAGGAAC	-14.01	0.463294
AAAGAACUUCACAACUGCUC	AUAGUGGUUGUGAAUUUACCUU	-13.73	0.463225
UCUUGAAACUGCUCAA	GUGAGCAAAGUUUCAGGUGU	-15.14	0.463139
AUAAGAAACCUGCUUCAA	AUAAGUAGGUUUUAUUCAGUUU	-12.81	0.462956
AAUAAUUAAUCUUGUACAA	UUUUAUACAAGAUUAGCC	-10.83	0.462031
UCUUUACCAACCACCACAAACCUCUAU	AAAGGAUGUUGGUAGAGUAUUG	-15.79	0.461831
ACACCUAUCCUUCU	GGAUAGGUGGGUUUCAUUGA	-15.62	0.461175
UGUAUUAAUGCUAAC	UGGGCGUUAAUACAUUUCAUA	-14.13	0.461162
ACCAAACCAACCAUAUCCAA	UAGGAUAUGGUAAUGCUAAAA	-13.09	0.461078
UCUUUACCAACCACCACAAACCUCUAU	CUUGUUUGUGGUGAUGUCUAG	-15.79	0.460887
AAUGGGUGAAUGAUUU	AUGGUAAAUUGUUCACUCAGAU	-13.94	0.460522
ACUCAAUUACCCCCUGCA	AAGGGGGUGCUUGAGAGGUUUGG	-20.76	0.460208
UUAAAAAUCUGAAUUCUUC	AAACGAGUUCAGAUUUACAGC	-14.74	0.459906
UUUACUCAACCGCUACUUUAGAC	UGAGGUAGUAGGUUUUGUAGUU	-16.04	0.459731
ACCAAACCAACCAUAUCCAA	AAUAAUACAUGGUUGGUCUUU	-13.3	0.45973
ACACCUAUCCUUCU	AAAGAAGGGUAGGAGUUGAGUA	-17.18	0.459604
AAAGAACUUCACAACUGCUC	UAUAGUUUUGUGUGGUUUUU	-11.53	0.459363
UUGUACUAAUUAUAUGCCUUAUUUCUU	CCUGGCAUAUUUGGUAUAACUU	-15.24	0.459313
ACAAUUGGAACUGUAACUUUG	CAAAACCACAGUUCCUUUUGC	-14.84	0.459016
AAUGGGUGAAUGAUUU	UCAUUCGCUCAUUCACACAGU	-15.95	0.458993
ACUCAAUUACCCCCUGCA	GUUGCUUGGGGGUAUUACUA	-15.3	0.458633
CUGUCUUUAUUUCACCUUAUAAUU	UCUCAGGAGUAAAGACAGAGUU	-16.07	0.457965
CUGUCUUUAUUUCACCUUAUAAUU	ACGAGGUGGACUUGAGACAGAA	-17.59	0.457834
GAAGAGCAACCAAUG	CAAGAAGGUUGCUCACUAUUU	-14.52	0.457611
UAACCUUAACUUGC	AUAUUCGUUAAGGUUGUAAC	-11.63	0.457154
UCUUUACCAACCACCACAAACCUCUAU	CGGGCGUGGUGGUGGGGG	-19.4	0.456578
AAAGAACUUCACAACUGCUC	AUUUCAGUGGAGUGAAGUUCA	-13.54	0.456046
UCUUUACCAACCACCACAAACCUCUAU	UGAUAUGUUUGUUAUUUGGUUGGU	-15.34	0.456005
UUUACUCAACCGCUACUUUAGAC	UGAGGUAGUAGGUUGUAUAGUU	-16.13	0.455907
AAUGGGUGAAUGAUUU	ACAUUCAACUCAUUAUUAAUG	-11.69	0.45575
UUUACUCAACCGCUACUUUAGAC	UGAGGUAGUAGGUUGGAUAGUU	-17.18	0.455341
UUUACUCAACCGCUACUUUAGAC	UGAGGUAGUAGGUUGUAAAGUU	-15.9	0.454936
ACUCAAUUACCCCCUGCA	UUCAUGUCGGGGGUGUUUGUG	-17.49	0.454876
CACAAGUCAAACAAAUUUACAAA	CGUGAUAUUUGUUUGGCUCAUC	-15.41	0.454841
UUUACUCAACCGCUACUUUAGAC	UGAGGUAGUAGAUUGAAU	-12.22	0.454782
UUUACUCAACCGCUACUUUAGAC	UGAGGUAGUUGGUUGUAUUGUU	-15.72	0.45473
UCUUUACCAACCACCACAAACCUCUAU	GGUGGGAGGUGGGGUGGUUC	-20.49	0.454727
UUGUACUAAUUAUAUGCCUUAUUUCUU	AAUGGGUAUAUGUCUAGUGC	-14.66	0.454011
CUGUCUUUAUUUCACCUUAUAAUU	UUGAGGCGAGUUGAAGACUAAA	-16.15	0.453907
AAUGGGUGAAUGAUUU	AAUUAUCGUGUCACUCAUUAUU	-13.45	0.453779
ACCAAACCAACCAUAUCCAA	AGGUUGUUUGGUUUUGUGUU	-13.28	0.453552
UUUACUCAACCGCUACUUUAGAC	AUCUGAAGAAAAUAGCGGCAU	-14.95	0.452619
AAAGAACUUCACAACUGCUC	GUAGGUUGUGGGUUUUUGUUU	-14.6	0.452433
UCUUGUCUGUUAAUC	UGAUUAAUUUGAUAAGGUAU	-10.88	0.452203
AAAGAACUUCACAACUGCUC	UAAGUUGUGUAAAUUCUAAC	-11.2	0.451431
AUUGUUUUUAUGUGUGUU	UAUACAUGAGAGCAUACAUAGA	-14.07	0.451396
UCUUGAAACUGCUCAA	UUGAGCAAAGUUUCAGGUGUAU	-14.74	0.451317
UCUUGAAACUGCUCAA	GUGAGCAAAGUUUCAGGUGUU	-15.1	0.450209
UUUGAUAAAAAUCUCUAUGA	AGACUAUAGAGAUUUUUGCUAU	-13.72	0.450131
ACCAAACCAACCAUAUCCAA	AUGAGGUUGGUUUAUUUUGG	-13	0.449827
UGUCACUAAGAAAUCU	CGUGAUCUCUUAGUGGCAUCUA	-16.3	0.449531
UUACCCACUUACUAAA	UAGUAUUUGUUAGUUAGUGGGUC	-15.99	0.44941
AUUGUUUUUAUGUGUGUU	UAUACAUACACACACAUAUAU	-11.56	0.449281
UAAACGAACAUGAAAAUU	UAUAUUACUUUUAUGUUCAG	-10.44	0.449225
AUAAGAAACCUGCUUCAA	ACUUAGCAGGUUGUAUUAU	-12.12	0.449222
UCUUUACCAACCACCACAAACCUCUAU	CAAAGGUAUUUGUGGUUUUUG	-12.69	0.448727
ACCAAACCAACCAUAUCCAA	GGGAUAUGAAGAAAAAU	-10.09	0.448644
UUACCCACUUACUAAA	GUAAGUGGUGUAGAUGAAACA	-14.78	0.448558
AAAGAACUUCACAACUGCUC	ACCUGUGAAGUUCAGUUCUUU	-13.87	0.448287
UUGUACUAAUUAUAUGCCUUAUUUCUU	UGAGGUAGUAGUUUGUGCU	-13.58	0.447889
UUACAAACAAUUUGAUACUU	UAAAACAAGUCAUUUUGUUUGUA	-9.84	0.447883
AAAGAACUUCACAACUGCUC	UUCUUCAAAGUGGUUGUGAAAUG	-14.72	0.447689
UUUACUCAACCGCUACUUUAGAC	UUUAGUCGCGGUUGGUGUUA	-14.19	0.447493
UCUUUACCAACCACCACAAACCUCUAU	GGAGUGGGUGGCAUGGUAAGA	-18.76	0.447199
CUGUCUUUAUUUCACCUUAUAAUU	UGGUAGAGCUGAGGACAG	-15.07	0.446916
UCUUUACCAACCACCACAAACCUCUAU	GAUACUACGUGGUUGGUGAUUC	-16.21	0.44668
GAGAAUUUGACUAAAG	UUACCAAGUUUCAAAUUCUCA	-12.92	0.446441
UCUUUACCAACCACCACAAACCUCUAU	CACAGUGGAGGUAAAGAUUG	-14.87	0.446279
UCUUUACCAACCACCACAAACCUCUAU	AAGUUGUUCGUGGUGGAUUCG	-15.54	0.446167
GAGAAUUUGACUAAAG	ACUAGUCGAGUUUCUCGUC	-12	0.445765
ACUCAAUUACCCCCUGCA	UGAGGGAGGAGGUUGGGUA	-17.37	0.445727
ACUCAAUUACCCCCUGCA	UGUAGGGGAAGAUAUGAAUUGA	-15.84	0.445695
UUAGAUAUAUGAAUUCA	AGAGUUGUCAUGUGUCU	-12.13	0.445465
UUUAUUACCCUGACA	UAUGUGAGGGUGGUAACUGAA	-15.79	0.445416
UAAACGAACAUGAAAAUU	AUCAGUUUCUUGUUCGUUUCA	-13.5	0.445251
ACCAAACCAACCAUAUCCAA	UGUGUGGUUUGUUUGGCCUC	-14.63	0.445087
UUUACUCAACCGCUACUUUAGAC	AGGGUCUUAGCGGUCGAGUGG	-18.92	0.444758
UGUCACUAAGAAAUCU	CAAGGAUUUCUUAGGGUGAU	-13.94	0.444374
UUGUACUAAUUAUAUGCCUUAUUUCUU	UGAGGUAGUUGGUUGUAUAGU	-15.17	0.444347
ACACCUAUCCUUCU	UGAGGGAGGAAGGGUGGUAU	-17.79	0.443752
UUUACUCAACCGCUACUUUAGAC	UGAGGUAGUAGGUUGUAUAGUUU	-16.07	0.443678
AUUGUUUUUAUGUGUGUU	AUAUAUACACACACACAUAAGAC	-14.26	0.443546
UCUUUACCAACCACCACAAACCUCUAU	GGGGUUGGUGGUUGAACUUCGA	-16.3	0.443537
ACUCAAUUACCCCCUGCA	UAUCUUUUGCGGGGGAAUUUC	-14.83	0.443481
ACCAAACCAACCAUAUCCAA	UAGGACUAUGGUUUGGAUUU	-13.37	0.443449
CACAUGCUUUUCCA	AGGAGAAGUAAAGUAGAA	-11.79	0.443233
ACCAAACCAACCAUAUCCAA	UUGGGUUGGUUUGGUCUCGGGUU	-18.62	0.443228
UCUUUACCAACCACCACAAACCUCUAU	UGAGGGGUUUGGAAUGGGAUGG	-19.1	0.443155
GAAGAGCAACCAAUG	AUUGAUUCAUUCUUUGCUCUUCU	-14.72	0.442973
GCUCUCACUCAACAUGG	UAAAAUAGACAAAGUGAGAGUU	-13.4	0.442829
AAAGAACUUCACAACUGCUC	CUCUCAAAGUGGUUGUGAAAUG	-14.66	0.442767
GAAGAGCAACCAAUG	UCAUUGAUUGGUUGAAAUUCA	-12.4	0.442699
UUGUACUAAUUAUAUGCCUUAUUUCUU	UGAGGUAGUAGUUUGUAUAGUU	-14.59	0.442658
UAUUCUGUUAUUUACUUGUAC	UGGAAGAAGAUGAUAGAAUUA	-13.3	0.442596
UCUUUACCAACCACCACAAACCUCUAU	AGGAGGACAUAUGUGGUGUGGU	-17.67	0.442414
UUGUACUAAUUAUAUGCCUUAUUUCUU	UAGCAUGUGUAGUACAUAAUG	-12.49	0.441967
GAAAUUAAAUUGGCAAA	CAUGCCAUUAAUUUCUAAGCA	-12.37	0.441786
UCUUUACCAACCACCACAAACCUCUAU	UUGGUGGUUAGUAGAAUUAAGACU	-16.06	0.441694
ACCAAACCAACCAUAUCCAA	UAGUUGGAUGUGGUGGCCCAU	-15.73	0.441482
ACUCAAUUACCCCCUGCA	AGGAGCAGGGGGUGGUCAAGCUGA	-21.17	0.441317
UUUACUCAACCGCUACUUUAGAC	GAGGUAGUAGGUGGUAU	-13.15	0.441275
UUACAAACAAUUUGAUACUU	AUAUGUCAGAUUGUUCUAUU	-11.15	0.44106
UGUCACUAAGAAAUCU	CGUGAUCUCUUAGUGGCAUCAC	-13.46	0.440733
UUACAAACAAUUUGAUACUU	AAAUCAAAUUGGCUGUGGAAU	-13.58	0.440337
CCAUACCCACAAAUUUUAC	AAAAAAGUUUGUUUGGGUUUUU	-11.21	0.440126
AUCCAUCAAAACCA	GUUUUCUUAGGUUUUGAUUUU	-11.2	0.439733
CCAUACCCACAAAUUUUAC	AGGGUGUGUGUGUUUUU	-11.69	0.439639
ACUCAAUUACCCCCUGCA	UAUGGGGGGAUUGGGAAGGAA	-18.05	0.439601
ACACCUAUCCUUCU	GAGGUAGUAGGUGGUAU	-13.1	0.439597
GAAGAGCAACCAAUG	AAGCUCUUCCUCAAAAUUU	-11.45	0.439371
CUGUCUUUAUUUCACCUUAUAAUU	UUGAGGCGAGUUGAAGACUUUA	-15.13	0.439315
AAUCAUCAUCUAAA	AGAAUCUUGAUGAUGAUUAAA	-10.91	0.439211
ACAAUUGGAACUGUAACUUUG	AAGUUUUAUUGCAGUUUUAAG	-11.07	0.439111
UUGUACUAAUUAUAUGCCUUAUUUCUU	UAAGUGCAUGUAUGGUGCUA	-12.44	0.43911
GCUCUCACUCAACAUGG	UCUGUUGAGUGUUUGCUGUGU	-15.36	0.439108
AUUGUUUUUAUGUGUGUU	UUGCACAUAAUAAGGACGGUA	-14.6	0.439098
UCUUUACCAACCACCACAAACCUCUAU	GUGAGUGGGGUGGUUGGCAUG	-18.54	0.439024
UUUACUCAACCGCUACUUUAGAC	AGAGUAGUAGGUUGCAUAGUA	-14.81	0.438815
UUUACUCAACCGCUACUUUAGAC	UCUAGUAAGAGUGGCAGUUGAA	-16.12	0.438639
ACCAAACCAACCAUAUCCAA	UAAGGGUAAUUUGGUUUGAAACC	-13.68	0.438462
UUGUACUAAUUAUAUGCCUUAUUUCUU	ACUAGCGUAUAGUUGGUAAUU	-11.16	0.438335
ACCAAACCAACCAUAUCCAA	UGUCGGUUGGUUUUUGUUUG	-13.24	0.437976
CUUUACUUGCUUUACA	UAUGGGAAAAGCAGGUGAAA	-14.24	0.437615
ACUCAAUUACCCCCUGCA	UCUGCAGGGUUUGCUUUGAG	-13.79	0.437223
CUUUACUUGCUUUACA	GUUGAGCAAGUUGAAGAUGAA	-14.44	0.437178
UCUUUACCAACCACCACAAACCUCUAU	CGGGCGUGGUGGUGGGCG	-17.58	0.437096
UCUUUACCAACCACCACAAACCUCUAU	GGGUGGUGGUUGACUUCUUUCU	-16.67	0.437074
ACCAAACCAACCAUAUCCAA	UUUCAAAUAUGGUUGGAGAUG	-12.48	0.436516
ACUCAAUUACCCCCUGCA	UAUAUAGGGUCAGGGGGUUC	-16.4	0.436402
UUAGAUAUAUGAAUUCA	CAUUGAGUUCGUAUUUCCA	-12.12	0.436285
CUGUCUUUAUUUCACCUUAUAAUU	UGUGUGAAGUAGAGGAAC	-13.19	0.436177
UCUUGAAACUGCUCAA	GUGAGCAAAGUUUCAGGUGUUU	-14.95	0.435987
AUACAAUGUAACAC	UCUGGGUGUUGCGUUGUGUGU	-17.01	0.435707
UCUUUACCAACCACCACAAACCUCUAU	CUUCGUGUGUUUUUGGUGGUUU	-14.94	0.435188
UCUUUACCAACCACCACAAACCUCUAU	UUUGUUGGUGGUCAUUUAACC	-12.25	0.435169
UAUUCUGUUAUUUACUUGUAC	UCAGGAGUAAAGACAGAGU	-13.92	0.435136
CACAUGCUUUUCCA	UAAUGAUUAGUAUGUGGCUU	-12.38	0.434844
CUGUCUUUAUUUCACCUUAUAAUU	GACUCCGGUGGAAUGAAGGA	-14.88	0.434706
GAAAUGAACGAAAUGU	AUCAGUUUCUUGUUCGUUUCA	-13.18	0.434697
ACCAAACCAACCAUAUCCAA	GAAUGGGCGGUUUGGGAAAGA	-16.82	0.434513
UCUUUACCAACCACCACAAACCUCUAU	GGAGUGGGCUGGUGGUU	-15.33	0.434155
UAUUCUGUUAUUUACUUGUAC	ACACCCGUACGAGUGACAGAAUA	-15.49	0.434137
ACAAUUGGAACUGUAACUUUG	UACAAAGUUGCUUCACCAUU	-12.52	0.434119
AAUUUGCUGAUGAUU	AAAUAUCAGCAGGUAAUUCU	-11.97	0.433853
UCUUGAAACUGCUCAA	CAGAGCAGUGGCAAGAACGCAU	-16.69	0.433732
AUCCAUCAAAACCA	AUGGACAAUUUUGGUUUUGAUG	-13.25	0.433715
CUGUCUUUAUUUCACCUUAUAAUU	AGGGUGGAAGAAAGAGGGCG	-17.43	0.433474
UCUUUACCAACCACCACAAACCUCUAU	UGGUUUCAUAUGGUGGUUUAGA	-14.99	0.433237
AUUGUUUUUAUGUGUGUU	UAUAAAUACAUGCACACAUAUU	-11.62	0.433097
AAAGAACUUCACAACUGCUC	AAAAAGGUGAGGUUUUGUUUU	-11.93	0.432874
ACUCAAUUACCCCCUGCA	AAAGAAGGGUAGGAGUUGAGUA	-16.18	0.432852
CCAAUGGAAAAACUCAA	UUUUCAUUGGAUUAGUGUU	-10.47	0.432823
CUGUCUUUAUUUCACCUUAUAAUU	CCCGCAGGUGAGAUGAGGGCU	-16.65	0.432692
UUUACUCAACCGCUACUUUAGAC	UGAGGUAGUAGGUUGUAUGGU	-15.82	0.432595
GAAGAGCAACCAAUG	UGUCAUGGAGUUGCUCUUCAAA	-14.31	0.432326
GAAGAGCAACCAAUG	UGUCAUGGAUAUGCUCUUC	-13.44	0.432293
AAUCAUCAUCUAAA	UUGGAUGAUGAAUUAUUUAACC	-11.95	0.432188
UUUAAUUUUUCACAAAUAUUAC	AACUAAAAUAGAUUGUGAAAAAUU	-11.66	0.432172
CUGUCUUUAUUUCACCUUAUAAUU	UUUUGAAAUAAAGAACUGUUUU	-10.35	0.43179
CGAAUACCAUAAUGAAU	AAAAGUAAUUGUGGUUUUUG	-10.34	0.431553
GAAGAGCAACCAAUG	GAUUGUGUUGUUUUCUUUUU	-10.49	0.43151
AUAAGAAACCUGCUUCAA	AAUGGGUUUUUGGAGCAGG	-13.86	0.431238
UCUUGAAACUGCUCAA	GUGAGCAAAGUUUCAGGUGUAU	-15.11	0.431098
ACCAAACCAACCAUAUCCAA	UGUGGAUAUAGGAGGGUUAGU	-15.9	0.430894
UCUUUACCAACCACCACAAACCUCUAU	UGACUGUUUUGGUGUAUGGUAGAG	-16.93	0.430789
GAAAUUAAAUUGGCAAA	UCGGCCAAUUUAUCUUUCAGC	-14.02	0.43059
UUAAAAAUCUGAAUUCUUC	UUCAAGUAAUUCAGGUG	-10.52	0.430442
UUUACUCAACCGCUACUUUAGAC	AGAAGAGAGAAGUUGAGUAGA	-14.83	0.430104
ACUCAAUUACCCCCUGCA	UGAGGGAGUUGAGUGUAUA	-13.96	0.430068
ACAAUUGGAACUGUAACUUUG	UAAAGUUAUGGUACCGAAGUCC	-14.48	0.430056
UCUUUACCAACCACCACAAACCUCUAU	UUGGUUUGUGAGUUUGUUUUUA	-12.6	0.430034
GCUCUCACUCAACAUGG	UGUUUCCAUGUUGUUGAGUGAC	-14.91	0.429931
AAUUUGCUGAUGAUU	AAUCAGCAAGUAUACUGCCG	-11.44	0.429914
AAUAAUUAAUCUUGUACAA	UUUGUACAAGAUGCUCUGUUU	-12.69	0.429878
UCUUGAAACUGCUCAA	UUGAGCAAAGUUUCAGGCGAAU	-14.47	0.429759
UUGUACUAAUUAUAUGCCUUAUUUCUU	UGGUAAAUAUCUAGUGCAAGUC	-14.79	0.429567
CACAAGUCAAACAAAUUUACAAA	AAGUUGGAAUUUGAUUGACU	-11.71	0.429567
CGAAUACCAUAAUGAAU	AUUCAUGUCAGUAUUCGGU	-12.48	0.429456
UUAAAAAUCUGAAUUCUUC	AGCAUGAAGAGUUCAGAUCACGUU	-15.76	0.429428
UUUAUUACCCUGACA	UUGUUGGGGUUUUUUUGUAU	-11.74	0.429407
ACUCAAUUACCCCCUGCA	UAUGGGGGGAUUGGGAAGGAAU	-18.05	0.429251
UCUUGAAACUGCUCAA	AAAGUUUUAGUGUAGUUUUAAGU	-12.11	0.429128
UCUUGAAACUGCUCAA	GUGAGCAAAGUUUCAGGUGUG	-15.13	0.429098
GCUCUCACUCAACAUGG	UCACAACCUUUUUGAGUGAG	-11.67	0.429044
UUUGAUAAAAAUCUCUAUGA	CGUGGAGAUUAAUAUAAACA	-11.64	0.428887
UUUACUCAACCGCUACUUUAGAC	UGAAGUAGAAUAGUUGGGUAUGGU	-16.98	0.428571
AAUGGGUGAAUGAUUU	UUGUUAAAAGUUUCAUCCAUU	-11.27	0.428517
UCUUUACCAACCACCACAAACCUCUAU	AGUGGGUGGAGUGGUAAGAUA	-16.64	0.428424
UCUUUACCAACCACCACAAACCUCUAU	CUGGUUUCACGUGGUGGUUUAGAU	-16.69	0.428388
ACUCAAUUACCCCCUGCA	ACAGGAGAAGGGGGUGAGAGA	-18.56	0.428341
GCUCUCACUCAACAUGG	CACCAAACAAGUGAGAGUGUG	-14.34	0.428188
UUGUACUAAUUAUAUGCCUUAUUUCUU	GAGGUUGUAGUUUGUGCUUU	-13.04	0.427962
UUGUACUAAUUAUAUGCCUUAUUUCUU	AGAUGUAGUUGGUGUAAA	-11.28	0.427921
UCUUUACCAACCACCACAAACCUCUAU	CGGGCGUGGUGGUGGGGGUG	-19.96	0.427867
UCUUUACCAACCACCACAAACCUCUAU	CUGGGUAGAGGUUGGGCGGUGGA	-21.28	0.427653
AAUCAUCAUCUAAA	UGAUUGGAUGAUGAGUUAUUUA	-12.72	0.427563
ACUCAAUUACCCCCUGCA	CGUUCCAGGGGGAUGUGAGUUU	-15.72	0.427522
ACCAAACCAACCAUAUCCAA	GAUGGAUGUGGCCACGGUAUGGUA	-17.94	0.427448
ACACCUAUCCUUCU	CAUCAGAGGGAUAGGAUGGAC	-15.88	0.427341
AUUGUUUUUAUGUGUGUU	CAGAGUACGCAAAAAAACAAUU	-12.74	0.42723
CACAUGCUUUUCCA	GGAAAAGUCGUGAUGUAUUUUU	-12.87	0.427149
CUGUCUUUAUUUCACCUUAUAAUU	GUUGAGGCGAGUUGAAGACUUU	-15.36	0.427023
UUUACUCAACCGCUACUUUAGAC	CUUAUCAGAGUUGGCGGUU	-13.73	0.426795
UUUACUCAACCGCUACUUUAGAC	UGAGGUAGUUGGUUGUAUGGUU	-15.82	0.42676
UCUUUACCAACCACCACAAACCUCUAU	GUAGUUUGUGUUGUUUGUUU	-11.39	0.426752
UUUACUCAACCGCUACUUUAGAC	UGAGGGAGGAGGUUGGGUA	-16.62	0.426482
UCUUGAAACUGCUCAA	UUGAGCAAAGUUUCAGGUGUGU	-14.73	0.426462
AUUUUUGUACUUGUUACU	UAGCAGGUGCAUUAUAAAUAU	-12.06	0.42645
GAAGAGCAACCAAUG	CGAUUGUUGGUAGUGUUCUUUA	-14.1	0.426239
AAUGGGUGAAUGAUUU	UCUUUCAGAUUUUUCACCCGACA	-13.59	0.426152
GCUCUCACUCAACAUGG	AAAAAUGGAGUGAGAAAUGGA	-13.37	0.426068
UUGUACUAAUUAUAUGCCUUAUUUCUU	CUGGUAGUGUAGUUAGUGAUU	-14.14	0.425904
ACUCAAUUACCCCCUGCA	CAGGGCAGGGCAAGAGUUGAG	-18.22	0.4258
CCAAUGGAAAAACUCAA	AAAAGUUCGUUUGAGUUUUUCU	-11.48	0.425658
CUGUCUUUAUUUCACCUUAUAAUU	CGGUGGAAUCUGAGGAUAGUG	-16.16	0.425487
CUGUCUUUAUUUCACCUUAUAAUU	CAGAGGAGGAGAUGAAGAGGGA	-18.78	0.425272
UCUUUACCAACCACCACAAACCUCUAU	UAGUUGGAUGUGGUGGCCCAU	-15.15	0.425203
AUAAGAAACCUGCUUCAA	UGAGGUAGUUUUUUGUACAGUU	-13.27	0.424912
CACAAGUCAAACAAAUUUACAAA	GUUUUGUUUGGGUUUGUU	-10.32	0.424866
AAUGGGUGAAUGAUUU	UAGCUGCCGAGUCAUUCAUCCA	-16.96	0.42485
UAUUCUGUUAUUUACUUGUAC	GUAAGUGUUACAGAAUAAUCUU	-11.89	0.424795
CUGUCUUUAUUUCACCUUAUAAUU	CGGUGGAACUUGAGGACGGUG	-17.59	0.424777
AAAGAACUUCACAACUGCUC	UAGUAGGUUGUGUUGUUUAGU	-13.34	0.424706
GAAGAGCAACCAAUG	UACUCACAUGGUUGCUAAUCA	-13.85	0.424586
GAAAUGAACGAAAUGU	AUUUUGUUCAUUUGGAUUAUGC	-12.17	0.424486
UGUCACUAAGAAAUCU	AGGUUUUUUGGUUUUGUUUU	-10.31	0.424455
UUUAAUUUUUCACAAAUAUUAC	UAAGUUAAGAUUUGUGAAGAA	-11.43	0.424434
AAAUGAUUGCUCAA	UGAGCAGUCAUAAGGUAGCCU	-15.29	0.424251
ACACCUAUCCUUCU	AGAGGUAGGUGUGGAAGAA	-14.58	0.424084
AAAGAACUUCACAACUGCUC	UUUUUGGUUGUUAAGUUCCAUU	-11.7	0.424067
UUGUACUAAUUAUAUGCCUUAUUUCUU	UUAAACUCCAGAAGUAGGGCU	-13.87	0.424029
UCUUUACCAACCACCACAAACCUCUAU	UUGAGAAUUUGUGGGCGGUAA	-14.94	0.42395
ACAAUUGGAACUGUAACUUUG	UUAAAGUUGUAGUUUGGAAAGU	-12.52	0.423545
ACUCAAUUACCCCCUGCA	CGGGGGGUAGCUGGGGCCGC	-19.19	0.423527
CGAAUACCAUAAUGAAU	AAAAAGUUCGUUUUGGUUUU	-9.91	0.423504
UCUUUACCAACCACCACAAACCUCUAU	GUGGUUUGUUUUGUGUUUUU	-11.09	0.423444
AAUUUGCUGAUGAUU	UUAGAUGACCAUCAGCAAACA	-13.95	0.42324
AUAAGAAACCUGCUUCAA	AGUGAAGCGAAGUUUUUUC	-11.18	0.423164
UCUUUACCAACCACCACAAACCUCUAU	CAUAAUGGAGGUUUUUUACU	-11.4	0.423163
UUGUGCAAACUUUA	UUGGUUUUCCUGUUUGCACAG	-12.41	0.423116
GCUCUCACUCAACAUGG	CUGGGUGAGAGAAACACGUAU	-14.27	0.42294
GCUCUCACUCAACAUGG	AAAAGGGUGAGAUUUUGUUUU	-11.8	0.422939
AUUGUUUUUAUGUGUGUU	UACAUACAUGCACACAUAAGAC	-14.31	0.422872
CUUUACUUGCUUUACA	AGUGAAGCGAAGUUUUUUC	-11.17	0.422786
UUUAAUUUUUCACAAAUAUUAC	UUGUAUUUGUGUGAUUAAAGU	-11.27	0.422572
UUUACUCAACCGCUACUUUAGAC	GAAGUCCUUGGGGUUGAGUGA	-16.23	0.422546
CUGUCUUUAUUUCACCUUAUAAUU	CAAGGUGGGAUUGACAGGUUCA	-16.45	0.422445
UCUUUACCAACCACCACAAACCUCUAU	AAACAUCUGGUUGGUUGAGAGA	-14.97	0.422404
ACACCUAUCCUUCU	UUCAAGUAAUUCAGGAUAGGU	-13.46	0.422341
UCUUUACCAACCACCACAAACCUCUAU	GAGGUUUGGGGAGGAUUUGCU	-16.44	0.422296
UUUACUCAACCGCUACUUUAGAC	UGAGGUAGUAGGUUGUAUGGUU	-15.79	0.421741
AAAGAACUUCACAACUGCUC	AGAGAUGAGCGGUUGUGCUUCA	-14.16	0.42168
UCUUUACCAACCACCACAAACCUCUAU	AAACGAGGUUUGUUACUUUGG	-11.37	0.421423
UCUUUACCAACCACCACAAACCUCUAU	UCCCUGAGUGUAUGUGGUGAA	-15.47	0.421296
UCUUUACCAACCACCACAAACCUCUAU	UGGUGGUUUACAAAGUAAUUC	-12.48	0.421195
ACACCUAUCCUUCU	CGGAGGAUUAGGUAAAACAAC	-14.25	0.421099
AUUGUUUUUAUGUGUGUU	AUACAUACACGCACACAUAAGA	-14.05	0.421037
AUACAAUGUAACAC	AGUGUUACAUUGGCUCAACAUU	-13.25	0.421036
UUUACUCAACCGCUACUUUAGAC	UGAGGUAGUAGUUUCUU	-10.32	0.420881
ACUCAAUUACCCCCUGCA	UAGGAUGGGGGUGAGAGGUG	-17.58	0.420775
CACAUGCUUUUCCA	UCCAAUAGGUCGAGCAUGUGC	-15.66	0.420742
UCUUUACCAACCACCACAAACCUCUAU	AAUUGUGGUGGGUUGACAGUC	-14.55	0.420642
UCUUUACCAACCACCACAAACCUCUAU	GUUGGUAAAGUGGAAUCAAA	-11.82	0.420491
AUCCAUCAAAACCA	GUAGGUUUUGUGGUUUUGUU	-12.18	0.42029
CGAAUACCAUAAUGAAU	AAAAGGCAUUGUGGUUUUUG	-11.02	0.42029
UCUUUACCAACCACCACAAACCUCUAU	UGGGGGUGCAGGUGGGGGGCU	-20.88	0.420205
UCUUUACCAACCACCACAAACCUCUAU	UGGGGUGGGAGGUUGGUGUGUG	-19.93	0.420198
ACCAAACCAACCAUAUCCAA	UUUCAUAUGGUGGUUUAGAUUU	-12.62	0.419967
ACACCUAUCCUUCU	UUCAAGUAAUUCAGGAUAGGUU	-13.75	0.419847
AAAGAACUUCACAACUGCUC	UCUUGUGUAGUUCUUUAGCAU	-12.88	0.419817
CACAUGCUUUUCCA	UGGAAUGUAAAGAAGUAUGUGA	-13.75	0.419719
UCUUUACCAACCACCACAAACCUCUAU	CUGGUUUCAUAUGGUGGUUUAG	-14.69	0.419714
UUUACUCAACCGCUACUUUAGAC	UCAAAGGAGCGGUUGAUGAGAUGU	-17.55	0.419455
UUUACUCAACCGCUACUUUAGAC	AAACAGGGUUGAGUAACUUCC	-13.93	0.419452
CACAAGUCAAACAAAUUUACAAA	GUGAGUUUGAAAUUGAAAUGUGUAAA	-14.86	0.419419
CCAUACCCACAAAUUUUAC	GAAACCAAGUGUGGGUGUGGCCU	-16.93	0.419371
CUGUCUUUAUUUCACCUUAUAAUU	AUGAAUGGUGAAGAUGAAGAG	-14.06	0.419326
AAAGAACUUCACAACUGCUC	UUGGACGAUGUAGUUGUGAAAC	-14.25	0.419241
UUGUGCAAACUUUA	ACAGUAGUUUGCACAUUGAUUA	-13.04	0.419158
CUGUCUUUAUUUCACCUUAUAAUU	GUUGAGGCGAGUUGAAGACUUA	-15.16	0.419132
ACAAUUGGAACUGUAACUUUG	UUAAAGUUGAAGUUUGGAAAA	-10.92	0.419033
CCAUACCCACAAAUUUUAC	AUUUGUGGGAAUGGGCUGAUUGG	-17.13	0.418929
ACUCAAUUACCCCCUGCA	UUCACGUCGGGGGUGUUUGUG	-15.74	0.41884
ACCAAACCAACCAUAUCCAA	AAAAGUUGGUUCGGGUUUUU	-11.74	0.418837
CUGUCUUUAUUUCACCUUAUAAUU	UCGCAGGUGAGAUGAUAGCAU	-15.35	0.418827
AAAGAACUUCACAACUGCUC	UCAUCAGAGUGGUUGUGACAUG	-15.34	0.418782
UUUACUCAACCGCUACUUUAGAC	UGGUAGCAGUAGCGGUGGUAA	-15.62	0.418767
UCUUUACCAACCACCACAAACCUCUAU	UGGGUAUCUGGAUGUGGUUGG	-16.7	0.418756
UGUCACUAAGAAAUCU	GAUUUCUUUGUGAAUCACCA	-11.08	0.418745
AAAGAACUUCACAACUGCUC	UUCACAGUGGUUAAGUUCUG	-13.01	0.418732
GCUCUCACUCAACAUGG	UCAUCAAGUUGAGUGACCGUA	-13.78	0.418718
CUGUCUUUAUUUCACCUUAUAAUU	CUACUCGGUGAGUAAGGAUAGC	-14.11	0.41857
GAGAAUUUGACUAAAG	UGAAACUAGUCGAGUUCCUC	-12.21	0.418437
ACUCAAUUACCCCCUGCA	AUGCAUGGGUGUAUAGUUGAGUGC	-17.04	0.418365
UCUUUACCAACCACCACAAACCUCUAU	GUGAAAGAGGUUUGGAUUGAAA	-14.16	0.418316
ACCAAACCAACCAUAUCCAA	UGUAAAUGGUUGGAAUCUGGUAU	-15	0.418293
CUGUCUUUAUUUCACCUUAUAAUU	UUAGAGGCUGGAAUAGAGAUUCU	-15.3	0.418261
CCAAUGGAAAAACUCAA	CAUACAUUUUUCUAUUGGAUACA	-12.69	0.41826
ACACCUAUCCUUCU	UGGAGGAGAAGGAAGGUGAUG	-16.89	0.418173
CUUUACUUGCUUUACA	UGAGGAGUUUAGAGCAAGUAAA	-14.58	0.418124
UUUACUCAACCGCUACUUUAGAC	UUUGGGAGUCUGCGGUUGGGAG	-18.22	0.41789
GAGAAUUUGACUAAAG	CCAGGUUAGAUUCUCAGGUUUU	-14.71	0.417779
CUUUACUUGCUUUACA	UAUGACGUAGAAGCGAGUGAAG	-15.03	0.417732
AAACUAUUUUUAGAGAUACU	AGUCUUUAAUGAUGGUAUUUAA	-11.5	0.417574
ACCAAACCAACCAUAUCCAA	UGGAUGUGGAAGGAGUUAUCU	-14.71	0.417542
UCUUUACCAACCACCACAAACCUCUAU	AGAGGUAGAGUGUUGUAGAGAU	-15.82	0.417194
UUUACUCAACCGCUACUUUAGAC	GGUAAAGUGGCGGCUAGGUUA	-15.81	0.41693
AUUGUUUUUAUGUGUGUU	UAUACAUACACGCACACAUAAGA	-14.05	0.416914
UCUUUACCAACCACCACAAACCUCUAU	GGAGGAGGUAGAGGGUGGUGGAAUU	-21.44	0.416877
CACAUGCUUUUCCA	GGGAAAGUCAUGACAUAUUUUU	-13.12	0.416773
UUACCCACUUACUAAA	UUGAGAUAUUAGGUGGG	-11.36	0.416728
UCUUUACCAACCACCACAAACCUCUAU	GUGGUGGCGGUGGUGUUGAUGA	-18.14	0.416724
ACUCAAUUACCCCCUGCA	CCAACGUGCAGGGGGACAUGG	-16.57	0.416541
UAAACGAACAUGAAAAUU	AAAUUCAUGUUCAAUCUAAACC	-11.71	0.416134
UCUUGAAACUGCUCAA	UUGAGCAAUGUUUUAAUGCA	-10.24	0.415922
UUGUACUAAUUAUAUGCCUUAUUUCUU	AAUAUUAAUAUAAUUGGUGAG	-10.04	0.415907
AUAAGAAACCUGCUUCAA	AUAAGUAGGUUUUAUUCGACUU	-11.39	0.415845
UGUCACUAAGAAAUCU	CAAGGAGUAAUUAGUGACAUC	-13.63	0.415802
AUUGUUUUUAUGUGUGUU	UGUCUGCAUACAAAAAACAGAA	-11.06	0.415789
AUAAGAAACCUGCUUCAA	CAUAAUGGAGGUUUUUUACU	-11.2	0.415739
UCUUUACCAACCACCACAAACCUCUAU	UGUGGUGAAUAAGAGAGAAUAUU	-14.16	0.415737
AUAAGAAACCUGCUUCAA	GUGGUUUCUUAUUCCUUUUU	-11	0.415722
AAAGAACUUCACAACUGCUC	UUUGUUCUGUGAAGUUUGUAUU	-12.33	0.415711
CUGUCUUUAUUUCACCUUAUAAUU	UCUAUUGGUGGGAUAAAGAAGAGA	-16.15	0.415701
UCUUUACCAACCACCACAAACCUCUAU	GAGAGUUUGGUGGUGUUGUUCA	-15.82	0.415659
AAAGAACUUCACAACUGCUC	UGUAAGGAGCAGAAGUGUGAAGC	-16.97	0.415626
UUACAAACAAUUUGAUACUU	UUAGGUUUCGUUGUUUGUAUUU	-12.06	0.415575
ACAAUUGGAACUGUAACUUUG	AAGUUGCAUAAUCGAGUUGG	-12.8	0.41545
UAAACAUAUAACUUCUA	GUUGUGUGUUUUCUUAUUUC	-11	0.415408
AAUGGGUGAAUGAUUU	UGAUCAUUUGCCCCGUCUUGU	-15.46	0.415368
UCUUUACCAACCACCACAAACCUCUAU	UAGUAUGAAGGGUGGUUGGUACUA	-14.99	0.415351
CCAUACCCACAAAUUUUAC	UCUGUAAACUAUGUGGGUGUUC	-14.86	0.415316
AAAGAACUUCACAACUGCUC	UCUCUCUGUUGUGAAGUCAAA	-13.38	0.41527
UCUUGAAACUGCUCAA	GAUCAUGUGGCAGUUUCAUU	-13.14	0.415166
UCUUGUCUGUUAAUC	ACCAGGCAAGAAAUAUUGU	-11.49	0.415101
ACCAAACCAACCAUAUCCAA	ACUGAUGUGAAGGUGGUUUGGC	-16.5	0.415094
AUAAGAAACCUGCUUCAA	UGAGGUAGUGUUUCGAAUGUCU	-14.8	0.415031
UUUACUCAACCGCUACUUUAGAC	CAUCAAAGCGGUGGUUGAUGUG	-12.81	0.414966
ACUCAAUUACCCCCUGCA	UCCCUUGCAGGGGCUGUUGGGU	-15.16	0.414888
CUGUCUUUAUUUCACCUUAUAAUU	UGAUGGGGAAUGAAGAUGAA	-13.83	0.414817
AUAAGAAACCUGCUUCAA	UAGCAGGUGCAUUAUAAAUAU	-11.73	0.414781
UCUUUACCAACCACCACAAACCUCUAU	UAAAGUAAUUGUGGUUUUGGC	-12.53	0.414763
ACUCAAUUACCCCCUGCA	GUAAGCAGGGGCUCUGGGUGA	-16.58	0.414707
UUUACUCAACCGCUACUUUAGAC	GGGUGGUGGUUGACUUCUUUCU	-15.81	0.414525
CUGUCUUUAUUUCACCUUAUAAUU	UCGCAGGUGAGAUGAUAGCA	-14.68	0.414455
GAAGAGCAACCAAUG	UUAACUUCUGCUCUUCUUUCA	-12.96	0.414455
AAUGGGUGAAUGAUUU	CAUUCACCGCGUGCCUUAA	-13.66	0.414442
AAUGGGUGAAUGAUUU	UCUGAUCGUUCACCUCCAUACA	-15.67	0.414441
UUUACUCAACCGCUACUUUAGAC	UCAGGUACCUGAAGUAGCGC	-13.78	0.414436
CUGUCUUUAUUUCACCUUAUAAUU	AAAAAGGUGAGGUUUUGUUUU	-11.42	0.414369
CCAUACCCACAAAUUUUAC	GAAAAGUUUGUUCGGGUUUU	-11.5	0.414265
AAUGGGUGAAUGAUUU	UAUUCAUUUACACCAAAUUUGG	-11.21	0.414112
ACCAAACCAACCAUAUCCAA	UGUGGUUAAGUUGGUGCA	-12.22	0.414097
CUGUCUUUAUUUCACCUUAUAAUU	AAAAGGGUGAGAUUUUGUUUU	-11.55	0.413978
AAUGGGUGAAUGAUUU	CAUCAUUCACUCUAAGCUGACU	-14.41	0.413962
UAUUCUGUUAUUUACUUGUAC	UUAUGCAAGUAGAUAAGCUCA	-12.61	0.41385
AAAGAACUUCACAACUGCUC	AGCGAGGUAUGAAGUUCUUACU	-14.12	0.413834
UUUACUCAACCGCUACUUUAGAC	AAAAGCUGGGUUGAGAGG	-13.01	0.413804
UCUUUACCAACCACCACAAACCUCUAU	UAAGGGGAGAGGUGUGGUGUAG	-18.07	0.413785
ACCAAACCAACCAUAUCCAA	UAAAAGUUUGGUUGGGUUUUU	-11.46	0.41342
UUUACUCAACCGCUACUUUAGAC	AGAGGUAGUAGGUUGCAUAG	-14.13	0.4134
CACAAGUCAAACAAAUUUACAAA	UUUGUUUGUUGUGUGUUUCG	-11.6	0.413253
UUUACUCAACCGCUACUUUAGAC	GACCGUCAAGUGGUUGUUGAG	-13.92	0.413179
UUUACUCAACCGCUACUUUAGAC	AUUUGGGGUGGGGGAUGGGGA	-18.62	0.413135
UCUUUACCAACCACCACAAACCUCUAU	CGUCAAAGUGGUGGUGAUUUG	-14.28	0.412955
UCUUGUCUGUUAAUC	UUCCAUUUUUAACAGAUACAA	-10.62	0.412908
AAAGAACUUCACAACUGCUC	GCUGCAGUUGGAUUUCGUU	-13.25	0.412901
GAGAAUUUGACUAAAG	AUUUGGUUAACAUUCUACC	-9.95	0.412863
GAGAAUUUGACUAAAG	UGUUAUAUUGUCAGAUUGUCA	-12.21	0.412779
ACUCAAUUACCCCCUGCA	CGUUCCAGGGGGAUGUGAGUUUA	-15.71	0.412769
ACUCAAUUACCCCCUGCA	AUGUGUCAGAUGGGUGGUUGAA	-15.92	0.412756
UUUAUUACCCUGACA	AGUUAGGGACAGAUAGAUG	-13.05	0.412713
CUGUCUUUAUUUCACCUUAUAAUU	AAGAUAGAAUGAGAUGAGGACU	-14.79	0.412667
ACUCAAUUACCCCCUGCA	AGAGAUGAAGCGGGGGGGCG	-17.25	0.412581
ACCAAACCAACCAUAUCCAA	GGUUGUGUGGUUGUGUGUGU	-14.89	0.41258
AUAAGAAACCUGCUUCAA	UUAGCAGGUUGUAUUAUCAUU	-12.03	0.412551
GCUCUCACUCAACAUGG	AAGUAAUUGUUUCCAUGUUGAU	-12.21	0.4125
ACUCAAUUACCCCCUGCA	AGGAUUUUGCAGGGUUGAU	-12.9	0.412404
CCAUACCCACAAAUUUUAC	UAAAAGUUUGGUUGGGUUUUU	-11.43	0.412338
UUUGAUAAAAAUCUCUAUGA	UCAGAGAAAAAGAGAUUUUUAU	-11.18	0.412242
AAUUUGCUGAUGAUU	AAUAAUUAGCAUCAUCAGUCU	-11.66	0.41216
AUAAGAAACCUGCUUCAA	GUGGGUUUUUUCAAAAUUUUUU	-10.29	0.412095
ACCAAACCAACCAUAUCCAA	AUUGAAUAUGUUGGUUACUAU	-11.21	0.411981
GCUCUCACUCAACAUGG	GUUGCUUGGGGGUAUUAU	-12.05	0.411966
CCAUACCCACAAAUUUUAC	CAUUAAUGUGGGUUUGGACGGUU	-15.48	0.411702
CACAUGCUUUUCCA	UUUAGAAACACAAAGCAUGUGU	-10.28	0.411529
UUCCAAAAUCAUAA	UAAAGUAAUUGUGGUUUUGGC	-12.43	0.411453
UCUUUACCAACCACCACAAACCUCUAU	UAGGUUUUGUGGUUCUUGUGAAAUA	-15.03	0.41133
UUUAUUACCCUGACA	CAGCGGUGAUGAUAAUAC	-11.99	0.411321
UCUUUACCAACCACCACAAACCUCUAU	AAUUUUUUAAGGUUGUUUGUGGAA	-12.7	0.411269
AAUCAUCAUCUAAA	UAUAUUGGAUGAUGUCAACAA	-11.25	0.411184
UCUUUACCAACCACCACAAACCUCUAU	AUCCCUGAGUGUAUGUGGUGAA	-15.46	0.411061
CACAUGCUUUUCCA	CAUUCCAGGAAAGGCAUUAAUAU	-13.68	0.411058
AUUGUUUUUAUGUGUGUU	AUAUACAUACACACAUACACA	-11.48	0.411028
GAAAUGAACGAAAUGU	ACACCAAUUCGUUCAUUUGCUUU	-13.65	0.411021
UUUACUCAACCGCUACUUUAGAC	GAGCUUGGUCUGUAGCGGUU	-13.96	0.410951
CACAAGUCAAACAAAUUUACAAA	UAUUGUAGGACUUGUAUUUAUC	-12.41	0.410927
UUGUACUAAUUAUAUGCCUUAUUUCUU	UGGUAUGUAACUUAGAAGUUU	-11.54	0.410822
CUGUCUUUAUUUCACCUUAUAAUU	ACAGGUGGAACCGAGGGCAG	-16.3	0.410786
UUUACUCAACCGCUACUUUAGAC	UCUAGUAAGAGUGGCAGUUGAAG	-16.12	0.410701
ACCAAACCAACCAUAUCCAA	UGGAUAUGAUGACUGAAA	-11.07	0.410608
ACUCAAUUACCCCCUGCA	AUAGUCAGGGGGAGCUGAGUUUC	-15.67	0.410317
UUUACUCAACCGCUACUUUAGAC	AUUAGGUAGUGGCAGUGGAAC	-15.47	0.410236
UCUUUACCAACCACCACAAACCUCUAU	GGGUGAGGGCAGGUGGUU	-15.84	0.410044
UUACCCACUUACUAAA	GGAGUGGGUGGGAUGGAAAAA	-16.39	0.409955
AUUGUUUUUAUGUGUGUU	UCGUGCACAUACAAACAUACAC	-11.57	0.409848
UCUUUACCAACCACCACAAACCUCUAU	UAAAAGUUUGGUUGGGUUUUU	-11.36	0.409812
UUGUACUAAUUAUAUGCCUUAUUUCUU	UGAUUAAUUUGAUAAGGUAU	-9.86	0.409809
UCUUUACCAACCACCACAAACCUCUAU	CCGGGUUGGUGGUUGAACUUCG	-15.99	0.40979
AUAAGAAACCUGCUUCAA	AGGGAAGCAGGUCAUUCUUUAUG	-15.07	0.409734
AUUUUUGUACUUGUUACU	UAAUGCGUGUAAUAAGUACUGU	-12.77	0.409689
UCUUUACCAACCACCACAAACCUCUAU	AGUGGGGGUUGGGGUAUAUAU	-15.94	0.409348
UUUACUCAACCGCUACUUUAGAC	UGAGGUAGUAGUUUGUAUAG	-12.44	0.409345
ACUCAAUUACCCCCUGCA	GGUGGAAGGCAGGGGGGUGUA	-18.68	0.40929
UCUUUACCAACCACCACAAACCUCUAU	AGCAAUGGUGGUGGUUUGGAGGAG	-19.17	0.409266
CACAUGCUUUUCCA	AAAGGAAAGGUGUGGAUCCAU	-13.43	0.409202
UUGUACUAAUUAUAUGCCUUAUUUCUU	UCUGGUAUGUAGUAGGUAAUAA	-13.33	0.409147
GAGAAUUUGACUAAAG	UUUCUUAAGUCAAACUUUUC	-9.87	0.409034
AAUGGGUGAAUGAUUU	UUCUAUAAAUUCAUCCAUCACA	-12.5	0.409031
ACCAAACCAACCAUAUCCAA	AGUGGAUAUGGGGUGGUACUGUG	-17.76	0.409028
GCUCUCACUCAACAUGG	GAAAGCCACCAUGUUGGGUAAA	-13.3	0.408979
CUGUCUUUAUUUCACCUUAUAAUU	UUGAGAUAAGACAGAGGAUAUU	-13.68	0.408969
UCUUGAAACUGCUCAA	GUGAGCAAAGUUUCAGGUGUGU	-15.1	0.408882
UUACCCACUUACUAAA	UAUGGUGAGAAGGGUAAGAAG	-14.65	0.408647
AAAGAACUUCACAACUGCUC	UCUGAAAGAGCAGUUGGUGUUU	-13.86	0.408608
UUUACUCAACCGCUACUUUAGAC	UAGGCUAGAGAGAGGUUGGGGA	-17.84	0.408518
ACUCAAUUACCCCCUGCA	UGAAUGUGAAUGGGUGAUUGGGA	-16.5	0.408416
CACAUGCUUUUCCA	UACUUGGAAAGGCAUCAGUUG	-13.77	0.408242
ACACCUAUCCUUCU	UGUAGUUUAAGAGGAUAGGUCUU	-14.3	0.408222
AUAAGAAACCUGCUUCAA	AAAUAUCAGCAGGUAAUUCU	-11.26	0.408119
CUGUCUUUAUUUCACCUUAUAAUU	UUCGGUGAAAUUUAGAACCAC	-11.67	0.408042
UCUUUACCAACCACCACAAACCUCUAU	GCUGGUUUCAUAUGGUGGUUUA	-14.55	0.407906
UCUUUACCAACCACCACAAACCUCUAU	AAUAAUACAUGGUUGGUCUUU	-11.8	0.407881
UUCCAAAAUCAUAA	UUGUGUGGUUUUGGAUGUCUG	-14.25	0.407842
UGUCACUAAGAAAUCU	CUGAUUUCAUUUGGUGACGUAGA	-14.36	0.407839
CUGUCUUUAUUUCACCUUAUAAUU	ACAGUGAGGUAGAGGGAGUG	-16.01	0.407794
UUAAAAAUCUGAAUUCUUC	GCUGCGGAGGAUUUAGAUG	-13.99	0.407515
CACAAGUCAAACAAAUUUACAAA	UUAAUGAUACAUGUUUGACU	-10.64	0.407507
UUGUACUAAUUAUAUGCCUUAUUUCUU	UGGAGAUGUUGGCAUUGAAUUGGC	-17.08	0.407443
ACCAAACCAACCAUAUCCAA	UGGUUUCAUAUGGUGGUUUAGA	-14.09	0.407225
GCUCUCACUCAACAUGG	UUUUAGAGCCUUGAGAGCACU	-13.23	0.407202
AUUGUUUUUAUGUGUGUU	UUUUGUCACAUAUAAUACAUA	-10.18	0.4072
UGUCACUAAGAAAUCU	UAUGGCAUUGUUCUUGGUGACA	-14.23	0.407037
AAUGGGUGAAUGAUUU	AUAUACAUACACACCCAUAUAU	-11.64	0.406993
AAAGAACUUCACAACUGCUC	UAGUAUGUUGUAAGGUUUUCUC	-12.99	0.406955
CCAUACCCACAAAUUUUAC	GUGGGUAUAUUAGGAAGCUU	-13.16	0.406926
CUGUCUUUAUUUCACCUUAUAAUU	UGGGUGAGGAGGGAGAGG	-16.11	0.406921
UGUCACUAAGAAAUCU	UGGAUUUCUUUGUGAAUCACC	-11.82	0.406745
UUGUACUAAUUAUAUGCCUUAUUUCUU	UGAGGUAGUUUUUUGUACAGUU	-12.7	0.40666
AAACUAUUUUUAGAGAUACU	AUUGAAACCUCUGAGAGUAGA	-13.17	0.406607
ACCAAACCAACCAUAUCCAA	UGGUUUGGUUGCACGUUUGCA	-12.71	0.40659
ACCAAACCAACCAUAUCCAA	GAGUGGUUGGUUUGUAUGAGAUGGUU	-18.15	0.406586
CCAUACCCACAAAUUUUAC	GUAGGUUUUGUGGUUUUGUU	-11.78	0.406487
UCUUUACCAACCACCACAAACCUCUAU	UUGUGUGGUUGUUGUUUUCCU	-13.16	0.406424
CUUUACUUGCUUUACA	UGAGGAGUUUAGAGCAAGUAA	-13.82	0.406351
CUGUCUUUAUUUCACCUUAUAAUU	UCGCAGGUGAGAUGAUAGCAUU	-15.19	0.406258
GAGAAUUUGACUAAAG	CUAUUAGUCAUCUGUCUCAUU	-12.74	0.40625
UCUUGAAACUGCUCAA	UCAAGUAGUUUCAUGAUAAAGG	-12.76	0.40624
UUUACUCAACCGCUACUUUAGAC	AAAGCUGGGUUGAGAAGG	-12.82	0.40621
ACACCUAUCCUUCU	GAAAUGGGAGGGUGGGAAAGA	-16.28	0.406188
ACAAUUGGAACUGUAACUUUG	AGAAUCAGUUUCGAUUGCAGAA	-12.59	0.406129
GCUCUCACUCAACAUGG	UAAUUUUUAUGUGGGAGUGUU	-11.61	0.405944
AUACAAUGUAACAC	AUUGAAACCUGUUGCAUUG	-11.39	0.405916
ACUCAAUUACCCCCUGCA	GUGAGUGGGGUGGUUGGCAUG	-17.14	0.405873
AAAGAACUUCACAACUGCUC	GAGCUGUUCACGAAGUUUUA	-11.67	0.405772
CUGUCUUUAUUUCACCUUAUAAUU	UGGAGAGAAAGGCAGUA	-12.15	0.405676
UCUUUACCAACCACCACAAACCUCUAU	GAAGUUGUUCGUGGUGGAUUCC	-15.13	0.40563
CGAAUACCAUAAUGAAU	UGAGUUCGUUAGGUAUUAUCU	-12.61	0.405597
UUAAAAAGUUGAAGAA	UUUCAUCUUCAACUUGCUCAA	-12.72	0.405483
CACAUGCUUUUCCA	UUCUUGGGAGGAGCAUGCUAG	-15.67	0.405433
UAACCUUAACUUGC	UGAAUUUGAGAAGUUGAGGUA	-12.68	0.405241
UCUUGUCUGUUAAUC	CAGACAAGAUCGAUCUCGCCU	-12.27	0.405218
UCUUUACCAACCACCACAAACCUCUAU	CUUAGCUGGGUAGUGGUGGUGC	-17.65	0.405188
UCUUUACCAACCACCACAAACCUCUAU	GAAGUUGUUCGUGGUGGAUUCG	-15.08	0.405159
UCUUGAAACUGCUCAA	AAAGUCUUUGUGUAGUUUUAAGC	-12.94	0.405008
AAAGAACUUCACAACUGCUC	UUAGGGUAGUUAACGGAAGUUA	-13.17	0.404857
AAUGGGUGAAUGAUUU	CGUAAUCAUUAUCAUUCGUU	-10.61	0.404807
ACCAAACCAACCAUAUCCAA	GGGAAAAUGUGGGUGUGGU	-14.28	0.404762
CCAUACCCACAAAUUUUAC	UGAAGGAAGAUUUGUGGAAAG	-13.25	0.404704
UUGUGCAAACUUUA	AGGUAGUAGUUUGUACAUUU	-10.87	0.404691
UUUACUCAACCGCUACUUUAGAC	AGCAUUCGUGGUUGAGGAUAU	-13.79	0.404517
GCUCUCACUCAACAUGG	GACGAUGUAGAGAGUGAGGGAGA	-18.05	0.404346
UCUUUACCAACCACCACAAACCUCUAU	GUAUGUGUUUGGUGAAAAGA	-11.94	0.404335
UUUACUCAACCGCUACUUUAGAC	UGAGGUAGGAGGUUGUAUAGU	-14.83	0.404308
AUUGUUUUUAUGUGUGUU	CAGAGUACGCAAAAAACAAUU	-11.74	0.40427
UCUUUACCAACCACCACAAACCUCUAU	UGAGGUAGUGGUUGUAAUAGCU	-14.78	0.404267
CACAUGCUUUUCCA	UUACAGAAAGCGUGUGUGUG	-12.7	0.404201
AAUGGGUGAAUGAUUU	UAUUUUCUGCAUUCGCCCUUGC	-13.86	0.404199
ACCAAACCAACCAUAUCCAA	CUGGAUGUGCUCGUUGGUCAUA	-15.6	0.404145
AUAAACCUAUUGUU	ACUAACUAUAGGUUUAUGCA	-11.12	0.40407
GCUCUCACUCAACAUGG	UAGGAUGGGGGUGAGAGGUG	-16.88	0.404021
ACUCAAUUACCCCCUGCA	GGGGCGGGGGGGCGGGUG	-18.33	0.404011
UUGUACUAAUUAUAUGCCUUAUUUCUU	AGGUGGAUGUUAGUGCAAUUUA	-13.51	0.404007
ACCAAACCAACCAUAUCCAA	UUGGGGGUGAGGUUGGUGUCUGG	-19.31	0.40389
UUUACUCAACCGCUACUUUAGAC	UGAGGGAGUUGAGUGUAUA	-13.11	0.403882
ACCAAACCAACCAUAUCCAA	GCGGGUAUGGUUGUGUUCCAAAGC	-17.07	0.403737
AUCCAUCAAAACCA	GGGUUGGAUGGAUUUGAAC	-12.85	0.403707
AAUGGGUGAAUGAUUU	UUCAUUCACCUCUGCUCUUGC	-14.69	0.403682
ACUCAAUUACCCCCUGCA	UUGUCAUCGGGGGUAUUAUGAA	-14.54	0.403553
AUAAGAAACCUGCUUCAA	UAUUUGCAGGUUUUAGGUCUAA	-13.09	0.403514
GCUCUCACUCAACAUGG	CACAACCUUUUUGAGUGAGCGA	-14.13	0.403484
AUUGUUUUUAUGUGUGUU	AAGUAGACACAUAAGAAGGAG	-13.49	0.403409
CCAUACCCACAAAUUUUAC	AUGGGUGAUGGGUGUGGUGU	-15.95	0.403287
UUUGAUAAAAAUCUCUAUGA	CAUAAUGGAGGUUUUUUACU	-10.86	0.403118
ACAAUUGGAACUGUAACUUUG	UUAAAGUUGAAGUUUGGAAAAU	-10.9	0.403107
ACUCAAUUACCCCCUGCA	ACAGAUAUGGUAGGGGGCACA	-16.16	0.403093
UUGUACUAAUUAUAUGCCUUAUUUCUU	UGGGCUAAAGUUGGUACAUGUA	-14.11	0.403028
ACUCAAUUACCCCCUGCA	AAGCAAUGGGGUAAGGAACAG	-14.94	0.402913
AAAGAACUUCACAACUGCUC	ACAGGUGAGGUUCUUGGGAG	-14.75	0.402785
ACUCAAUUACCCCCUGCA	AUCCCUUGCAGGGGCUGUUGGGU	-15.15	0.402711
UCUUGAAACUGCUCAA	UAGGUAGUUUCAAGUUGUUGGG	-14.03	0.402698
UUUACUCAACCGCUACUUUAGAC	AAUGAGUGGUGGUCUAGUGCAC	-15.62	0.402681
ACCAAACCAACCAUAUCCAA	AACAUGGAUGUUGUGAGUUUGUU	-13.61	0.402663
AAUGGGUGAAUGAUUU	AACUGCCGACUCAUUCACUCA	-14.7	0.402629
CUGUCUUUAUUUCACCUUAUAAUU	GCAGCAGGGUGAAACUGAGACA	-15.46	0.402604
CCAUACCCACAAAUUUUAC	UAAGUUAAGAUUUGUGAAGAA	-10.84	0.402525
UAAACGAACAUGAAAAUU	UCAUGUUGGUUUUUUGUUGGU	-12.25	0.402431
UCUUGAAACUGCUCAA	GUGAGCAAAGUUUCAGGUGUUC	-14.33	0.402415
UCUUUACCAACCACCACAAACCUCUAU	GUCCCUGAGUGUAUGUGGUG	-15.11	0.402397
CUGUCUUUAUUUCACCUUAUAAUU	UCGGGUGAUGAGGACAGGAGGA	-18.17	0.402347
AAUGGGUGAAUGAUUU	UAUACAUACACACCCAUAUAC	-11.68	0.402342
AAAGAACUUCACAACUGCUC	UCUGAAAGAGCAGUUGGUGUU	-13.55	0.402316
UCUUUACCAACCACCACAAACCUCUAU	GAAUAUUAAAAAUGGAGGUA	-10.36	0.402174
UUGUACUAAUUAUAUGCCUUAUUUCUU	UAAGGUAGUAGAUUGUAUAGUU	-12.49	0.402125
GAGAAUUUGACUAAAG	UAGUCGGAUUUAUAUCAAUC	-10.45	0.402078
UUGUACUAAUUAUAUGCCUUAUUUCUU	UGAGGUAGUUGUUUGUACAGU	-12.93	0.402052
ACCAAACCAACCAUAUCCAA	GAAUAUGGGUAUAUUAGUUUGG	-12.64	0.402036
UCUUGUCUGUUAAUC	UCAGAUAAGGUAUUUAAUUUU	-9.93	0.402024
UUUACUCAACCGCUACUUUAGAC	CGUGAGUGGUGGGGUAAGAUA	-15.9	0.402023
UCUUGAAACUGCUCAA	AAAAGUCUUAGAGCAGUAUU	-11.22	0.401862
ACUCAAUUACCCCCUGCA	ACUUAGGGGGCAGUUUUGUAG	-14.45	0.401724
CUGUCUUUAUUUCACCUUAUAAUU	AAGUAUGAGGAAAUGGAGAUCU	-14.12	0.401707
ACUCAAUUACCCCCUGCA	AGUGGGGGUUGGGGUAUAUAU	-15.64	0.401644
UAUUCUGUUAUUUACUUGUAC	UUCAAGUAAUUCAGGAUAGGU	-12.8	0.401632
CUGUCUUUAUUUCACCUUAUAAUU	GGGUUGAUAUGAGGACACAUG	-13.89	0.401561
GAAGAGCAACCAAUG	AGAAUGACCGGUUUGCUCUUU	-13.38	0.401561
UCUUGAAACUGCUCAA	AGAUCAUCUGGCAGUUUCAAC	-14.11	0.401537
AAUCAUCAUCUAAA	CAGCGGUGAUGAUAAUAC	-11.7	0.401372
GCUCUCACUCAACAUGG	UGAGAGCGCAAAAAUAAAUUUG	-11.98	0.40134
CGAAUACCAUAAUGAAU	UAUUUUUGUGUCGUUAUGGUC	-12.08	0.401329
GCUCUCACUCAACAUGG	UUUUCGGGUGAGAGUGGUCCU	-15.06	0.401279
UAUUGAAUAUCCUAUAA	AAAUACAGGAUAUUCGUUCUU	-10.75	0.40097
UCUUGAAACUGCUCAA	AAGUAGUUUCAUGAUAAAGGGU	-13	0.40074
UCUUUACCAACCACCACAAACCUCUAU	GGAGAUGGGAGGGUCGGUAAAG	-17.4	0.400737
UAUUGAAUAUCCUAUAA	UCUUUAACUGGGUGUUCAAA	-11.52	0.400696
ACACCUAUCCUUCU	CGGGGAGGGAGGGUGGUG	-16.91	0.400616
AAUUUGCUGAUGAUU	AAUCAGCAAAUAUACUGCCCUA	-11.71	0.400616
UUACAAACAAUUUGAUACUU	CUUACCAGAUUGUAUUGUAAUU	-11.49	0.400488
CGAAUACCAUAAUGAAU	UUGAAAAAAUUGUGGAUUUGA	-10.48	0.400459
ACAAUUGGAACUGUAACUUUG	ACCUGUGAAGUUCAGUUCUUU	-12.39	0.400452
ACUCAAUUACCCCCUGCA	UGGGGGUGGGGGGGUGACAG	-18.96	0.400422
UUUACUCAACCGCUACUUUAGAC	GUGAAGUGUUUGGAGUAGCUC	-14.49	0.400276
CUGUCUUUAUUUCACCUUAUAAUU	CGGUGAAAUAUUUUGACCAAUU	-9.95	0.400241
ACAAUUGGAACUGUAACUUUG	AAAACCGUCUAGUUACAGUUGU	-11.57	0.400208
UCUUUACCAACCACCACAAACCUCUAU	ACUGUUUUCGUGUGGUGGUGAG	-15.62	0.400102
UUUACUCAACCGCUACUUUAGAC	UUUAGGAGAGUGGUAUUUGAG	-13.37	0.40006
CUGUCUUUAUUUCACCUUAUAAUU	UGGUAGAGCUGAGGACA	-12.86	0.4
CCAUACCCACAAAUUUUAC	GAUGGACAGGGUAUGGGAG	-15.11	0.399947
UUACCCACUUACUAAA	AGGAAGUGGGUCCAACUU	-11.42	0.39986
ACCAAACCAACCAUAUCCAA	CUGGUUUCAUAUGGUGGUUUAG	-13.99	0.399714
AUAAGAAACCUGCUUCAA	AAAAGUUCGUUCAGGUUUCU	-11.53	0.399653
AAAGAACUUCACAACUGCUC	ACGUCAAGGCGGUUGUGAUGUG	-14.71	0.399511
ACUCAAUUACCCCCUGCA	CAGAAGGGGAGUUGGGAGC	-15.76	0.399493
AUAAGAAACCUGCUUCAA	CACUUAGCAGGUUGUAUUAUAU	-12.69	0.399433
UCUUGAAACUGCUCAA	UUGAGCAAAAUUUCAGGUGUG	-12.24	0.399347
ACAAUUGGAACUGUAACUUUG	ACAAAGUUUGUUCGGGUUUUA	-11.68	0.399316
UUAAAAAUCUGAAUUCUUC	AAAAAGUUUAUUCGGGUUUUU	-9.89	0.399273
AAAGAACUUCACAACUGCUC	AGGUAGUUGGUUGUGUUG	-11.81	0.399256
CUGUCUUUAUUUCACCUUAUAAUU	UAGGGUGGGGGAAGAUGGGAC	-17.99	0.399245
UUACCCACUUACUAAA	AAUGACAAUCGAGUGGGUGAG	-14.38	0.399223
CUGUCUUUAUUUCACCUUAUAAUU	UAAAGUGGAAUUGGGAUAAUA	-11.87	0.399126
UUUACUCAACCGCUACUUUAGAC	UGAUGUGCUAAAGUGUCGGUUU	-13.88	0.398965
CCAUACCCACAAAUUUUAC	UGAAAAGUUUGUUCGGGUUA	-11.44	0.398884
CUGUCUUUAUUUCACCUUAUAAUU	GACUCCGGUGGAAUGAAGGAC	-14.61	0.398853
CACAAGUCAAACAAAUUUACAAA	UAACAAGUGGGUUUGUUGACUG	-12.33	0.398771
GAAAUUAAAUUGGCAAA	UUUCAUGUCGAUUUCAUUUCAUG	-11.99	0.398736
UAACCUUAACUUGC	CGUGACGUAGUUAAGGUUA	-11.38	0.398599
UCUUUACCAACCACCACAAACCUCUAU	UGGUGGUGGUUUACAAAGUAAUUCA	-14.99	0.398458
GCUCUCACUCAACAUGG	CAAGAUGUGCAUAUGUUGAGUGA	-14.39	0.398394
ACCAAACCAACCAUAUCCAA	ACGUGGAUGUGGACUUGAUA	-13.65	0.398308
ACCAAACCAACCAUAUCCAA	AGGGUGUGUGUGUUUUU	-10.59	0.39827
CCAUACCCACAAAUUUUAC	CACUGUGGGUACAUGCU	-11.7	0.39823
AUAAGAAACCUGCUUCAA	AGAGGUAGGUGUGGAAGAA	-13.69	0.398197
GCUCUCACUCAACAUGG	UGUGUGGAGCUGAGAGUUUUCU	-14.83	0.398121
AUAAGAAACCUGCUUCAA	UGAGGUAGGUGUGAGAAAUGA	-14.55	0.398085
CACAUGCUUUUCCA	AAGUGAUUAUAUGGAGAAGCAC	-13.48	0.397992
AUAAGAAACCUGCUUCAA	ACAUUCAUUGGAGCAGGGACA	-15.04	0.397778
ACACCUAUCCUUCU	AGGGAUAGGUAAAACAACUACU	-13.15	0.397641
UCUUUACCAACCACCACAAACCUCUAU	AACAGGUUAAAUGUGGUGCAGU	-14.16	0.397641
UUAAAAAUCUGAAUUCUUC	AAAAGUUAGUUCAGGUUUUUCU	-11.59	0.397599
AAUCAUCAUCUAAA	UGGAUGAUGAGUUAUUUAACC	-11.66	0.39741
ACACCUAUCCUUCU	CAUCUGAAGGAUAGAACACAUA	-13.33	0.397199
AUUGUUUUUAUGUGUGUU	UAGCACCAUAUAAAUUCAGUAA	-12.13	0.397184
AAAGAACUUCACAACUGCUC	UGGAAUGUUGUGAAGUAUGUGC	-14.47	0.397091
ACACCUAUCCUUCU	GAAAUCAAGGAUGGGUGAGACCU	-15.37	0.397055
AAAUGAUUGCUCAA	GUGAGUAGUCGUAUGUUUAUUAA	-12.72	0.39688
UCUUUACCAACCACCACAAACCUCUAU	UGGUUGGUGGUUGAACUUCGAUUUU	-15.03	0.396779
UCUUUACCAACCACCACAAACCUCUAU	CUCAAGGGUGUUUGUGAAAUA	-12.55	0.396775
GCUCUCACUCAACAUGG	UGGAGCUGUUGGGGAGAGUUA	-15.31	0.396735
CUGUCUUUAUUUCACCUUAUAAUU	GUGGGUGGAAUAAUAUAACAAU	-12.67	0.396681
AAUGGGUGAAUGAUUU	UUUAUUCACCAUACUCUCAAU	-11.8	0.396639
AAAGAACUUCACAACUGCUC	UGUAGUAAUUGUAGAAGUUCAGGG	-15.25	0.396619
UUUACUCAACCGCUACUUUAGAC	UGAUUGUAGCCUUUUUGAGUAGA	-14.06	0.396503
ACACCUAUCCUUCU	UAGUGAGGAUGGGAAAUUUGU	-13.41	0.396394
ACACCUAUCCUUCU	AUAUGGACGAAGAGAUAGGUAAAU	-14.7	0.396333
ACUCAAUUACCCCCUGCA	UGGGGGUGGCGUGAGUUGUGG	-17.72	0.396332
UUUACUCAACCGCUACUUUAGAC	CGUGGUGGUGGGGGUGGGG	-17.82	0.396264
ACACCUAUCCUUCU	UUCAAGUAAUCCAGGAUAGGUU	-13.25	0.396232
ACUCAAUUACCCCCUGCA	AGGGGUGCUAUCUGUGAUUGAG	-15.98	0.396231
AUUGUUUUUAUGUGUGUU	CAGUGCACAUAUAACAGUAA	-11.61	0.396111
ACUCAAUUACCCCCUGCA	UGGACGUGCAGGGGGAUGUCUG	-15.42	0.396096
AAUCAUCAUCUAAA	CAUGAUGAUGAGAAUUUGU	-10.4	0.39604
AAAGAACUUCACAACUGCUC	UAUUUUCGAGACAGUUGUAAC	-11.86	0.395861
UCUUUACCAACCACCACAAACCUCUAU	UGGUGGGUGAGGAGGAGG	-15.59	0.395786
UAUUGAAUAUCCUAUAA	AUAAGUAGGUUUUAUUCAGUUU	-10.95	0.395735
CCAUACCCACAAAUUUUAC	GUAGGUUGUGGGUUUUUGUUU	-12.77	0.395724
AUUGUUUUUAUGUGUGUU	ACCCCACACAUUUAAGCC	-12.37	0.395713
ACACCUAUCCUUCU	UGAGGGAGUGGGUGGGAGG	-16.89	0.395643
CGAAUACCAUAAUGAAU	UGAUGUUAUUUGUGGUAUAAA	-10.73	0.395503
UUCCAAAAUCAUAA	CGUCUGUGAUUUUGGUUUUUAAC	-13	0.395497
ACUCAAUUACCCCCUGCA	GGGCAGGGGCAGGGGGCG	-17.73	0.395494
ACUCAAUUACCCCCUGCA	CGUGAGUGGUGGGGUAAGAUA	-15.64	0.395449
GCUCUCACUCAACAUGG	UGGAGUGAGAGAAUGGGAGGU	-16.28	0.395434
UAACCUUAACUUGC	UAAGGCAUUUUAAGGUUGUUC	-11.75	0.395357
UCUUUACCAACCACCACAAACCUCUAU	UGUGGUGGGAGGACAGUGAUGU	-16.92	0.395327
CACAAGUCAAACAAAUUUACAAA	GUUUUGUUUGGGUUUGUUUU	-10.31	0.395322
GCUCUCACUCAACAUGG	UUUGGAGUGAGAGGAUCUGGUA	-15.44	0.395087
AAUCAUCAUCUAAA	AUGAUGAUGAUGAUGAUGAAA	-11.75	0.394958
GCUCUCACUCAACAUGG	GGUGGGGGCUGUUGUUU	-12.65	0.394942
AUUGUUUUUAUGUGUGUU	UAGCACCAUAUAAAUUCAGUAU	-12.1	0.394909
AAAGAACUUCACAACUGCUC	CCUCAUCAAGUGGUUGUGAUA	-12.49	0.394878
AUAAGAAACCUGCUUCAA	UGAGGCAGUAGAUUGAAU	-11.34	0.394847
UCUUGAAACUGCUCAA	GUGAGCAAAGUUUCAGGUGCCU	-14.79	0.394821
ACUCAAUUACCCCCUGCA	UUUCAAGCUGGGGGGUGUUUUUG	-15.67	0.39471
UCUUUACCAACCACCACAAACCUCUAU	UCUGAGGAUUUUUUUUGUGGUC	-13.08	0.394689
ACUCAAUUACCCCCUGCA	GGUGGGGGCUGUUGUUU	-12.64	0.39463
UAAACAUAUAACUUCUA	GUUGUGUGUUUUUGUUUUCC	-11.09	0.394522
UUACAAACAAUUUGAUACUU	UUUGUAUCAGAUGCUUUGUUUG	-12.13	0.394472
CACAUGCUUUUCCA	AAAGCAUGUGGAAUGAAGAAAG	-13.08	0.394451
UAAACAUAUAACUUCUA	UUUGUUUGUUGUGUGUUUCG	-11.07	0.394371
UUUACUCAACCGCUACUUUAGAC	UGAGGUAGGAGGUUGUAUAGUU	-14.81	0.394302
CCAUACCCACAAAUUUUAC	UCCUGUAGAGUAUGGGUGUGGUUU	-16.06	0.394207
AAAGAACUUCACAACUGCUC	AGGUCAGAGCAGAUGGAGGUUCGU	-17.68	0.394115
CUGUCUUUAUUUCACCUUAUAAUU	UGGUGAAAUUUGUAGAUUGGA	-12.41	0.394093
UCUUGUCUGUUAAUC	UAACAGACUUAGAUUAACAGA	-11.74	0.394092
CUGUCUUUAUUUCACCUUAUAAUU	CCAGAGUGGAAUGAAGAUAUGGUU	-15.51	0.394055
UCUUUACCAACCACCACAAACCUCUAU	GUCCCUGAGUGUAUGUGGUGAA	-15.47	0.39404
AAAUGAUUGCUCAA	UGAGUAGUCAAUGGAAUAAUG	-12.02	0.393969
UCUUUACCAACCACCACAAACCUCUAU	GGUGGGAGGUGGGGUGGGCA	-18.78	0.393958
CUGUCUUUAUUUCACCUUAUAAUU	UUCUGAGCUGAGGACAG	-11.4	0.393782
UCUUGAAACUGCUCAA	UAGGUAGUUUCAUGUUGUUG	-11.67	0.393725
UUAAAAAGUUGAAGAA	UUGAAAUCUCUUCAACUUUCAGA	-11.46	0.393679
CACAUGCUUUUCCA	CAAAGGAAGGGGGAGUAUG	-13.77	0.393654
UUACCCACUUACUAAA	UGUGGGCAAAGUGAGUGGGAUC	-16.95	0.393637
UUUACUCAACCGCUACUUUAGAC	AGAGGUAGUAGGUUGCAUAGU	-14.11	0.393584
UCUUGAAACUGCUCAA	GUGAGCAAAGUUUCAGGUGUGC	-14.96	0.393581
UUUACUCAACCGCUACUUUAGAC	GCAAUUAAAAGUAGCAGUG	-10.59	0.393534
AUAAGAAACCUGCUUCAA	UAAGUGAAGAAAGAGGUAGGUU	-13.76	0.393368
UUGUACUAAUUAUAUGCCUUAUUUCUU	UGAGGGAGUUGGGUGUAUA	-13.59	0.393343
UUUAAUUUUUCACAAAUAUUAC	CUCAAGGGUGUUUGUGAAAUA	-12.44	0.393298
AAUUUGCUGAUGAUU	UUAGAUGACCAUCAGCGAACA	-13.65	0.393258
CACAUGCUUUUCCA	ACAGGGAGGAGAUUGUA	-11.51	0.393235
CACAAGUCAAACAAAUUUACAAA	AGGUUGUUUGGUUUUGUGUU	-11.51	0.393101
UUGUACUAAUUAUAUGCCUUAUUUCUU	UGAGGUCUUAUAGUUAGGUAGA	-13.77	0.393092
UCUUUACCAACCACCACAAACCUCUAU	UUUCAUAUGGUGGUUUAGAUUU	-11.81	0.393012
AAAGAACUUCACAACUGCUC	UACAGUUGUAGGAGUCGUUUGC	-14.62	0.393011
UAAACAUAUAACUUCUA	UGAGGUAGGAGGUUGUGUG	-14.04	0.392837
AAUAAUUAAUCUUGUACAA	UUUGUAUAAGAUGCUCCAUU	-10.94	0.392819
UCUUUACCAACCACCACAAACCUCUAU	UGUGAGGGUGGUGGACGGCAGGG	-19.94	0.392752
UUUAUUACCCUGACA	AAAAAGUUCGUUAGGGUUUUUC	-11.27	0.392683
CUGUCUUUAUUUCACCUUAUAAUU	AAAGCAUGUGGAAUGAAGAAAG	-13.02	0.392642
AUAAGAAACCUGCUUCAA	GGAUUAAGAGAAGUAGGAC	-12.27	0.39264
ACACCUAUCCUUCU	UGAGGUAGGUGUGAGAAAUGA	-14.35	0.392613
GCUCUCACUCAACAUGG	CAUGGGUUGUUUGGUGAGAGG	-14.73	0.392591
UUUACUCAACCGCUACUUUAGAC	UCACACCCAGGUUGAGUGAGU	-12.59	0.392579
UUUACUCAACCGCUACUUUAGAC	AAUCAUACGCGGUUGACCUAUU	-12.9	0.392575
UUGUACUAAUUAUAUGCCUUAUUUCUU	UGAAGUAAGGUAGACUAGUAAGGU	-15.41	0.392511
UUUACUCAACCGCUACUUUAGAC	UGAGGUAGUAGGUUAUAUAGUU	-13.1	0.392451
UUGUACUAAUUAUAUGCCUUAUUUCUU	UGAGGCAGUAGAUUGAAU	-11.27	0.392409
UCUUUACCAACCACCACAAACCUCUAU	AGUCAGCAUUGGUGGUUU	-11.54	0.39225
GCUCUCACUCAACAUGG	AAAGCAAAUGUUGGGUGAACGGC	-15.05	0.392234
UCUUUACCAACCACCACAAACCUCUAU	UCAGGGUUGGUAGGGGUUGCU	-16.36	0.392232
UCUUUACCAACCACCACAAACCUCUAU	GUGGGUAUCUGGAUGUGGUUGG	-16.69	0.39206
AAUGGGUGAAUGAUUU	UUAAAUAAUCCAUCAUCCAAUC	-11.2	0.39202
UCUUUACCAACCACCACAAACCUCUAU	AUAGUUAUUAAUCUUGGUUGGU	-11.75	0.391797
UUUACUCAACCGCUACUUUAGAC	UGAGGUAGUAAGUUGUGUUGUU	-13.56	0.391794
UUUACUCAACCGCUACUUUAGAC	UAAAGUGGCAGAGUAUAGACAC	-13.56	0.391794
UCUUGUCUGUUAAUC	AUGACCUAUGAAUUGACAGACA	-13.03	0.391762
AAUGGGUGAAUGAUUU	CAUUCACCGCGUGCCUUAAUU	-13.64	0.391729
CUGUCUUUAUUUCACCUUAUAAUU	AGAGGUGACCAUUGGAGAUG	-14.11	0.391509
ACACCUAUCCUUCU	UGUAGGCAUGGGUGUUUG	-11.94	0.391475
CUUUACUUGCUUUACA	CUGGGGCAAGUGGAGUACGUU	-15.92	0.391443
AAUGGGUGAAUGAUUU	CACUUCAUUUCACCUAUUCUCU	-13.5	0.391418
AAUCAUCAUCUAAA	UUGGAUGAUGAGUUAUUUAACCC	-11.85	0.391347
CACAAGUCAAACAAAUUUACAAA	UGGAAGACUUGUGAUUUUGUU	-12.03	0.391347
CCAAUGGAAAAACUCAA	GAACGGGAGUUUCCUCCAUUGG	-12.19	0.391332
CUUUACUUGCUUUACA	UAGAGCAUGUAAAGGGAUUUCC	-13.95	0.391304
UCUUUACCAACCACCACAAACCUCUAU	CAUGGGAGUUCGGGGUGGUUGC	-17.9	0.391257
AAUUUGCUGAUGAUU	UAUAAUUAUCAGCACCGUCCA	-13.19	0.391163
AUUUUUGUACUUGUUACU	AACAAGUACUAAGGAAGCACA	-11.4	0.391081
UCUUGUCUGUUAAUC	AACUGCAAACGGAUAAGGU	-11.74	0.391073
AUUGUUUUUAUGUGUGUU	UAUACAUGCACACAUACACAC	-12.13	0.390786
CCAAUGGAAAAACUCAA	UAAGUCGUGAUGAGUUUUUCU	-11.7	0.390782
UUUACUCAACCGCUACUUUAGAC	CUGUCCUAAGGUUGUUGAGU	-13.18	0.390634
AAAGAACUUCACAACUGCUC	CUGCAGUCACAGUGAAGUCUG	-13.84	0.390629
ACUCAAUUACCCCCUGCA	AUGGAUGGGGGUGAGGGGUGCA	-18.84	0.390628
UCUUUACCAACCACCACAAACCUCUAU	CAUGUUUCGGGUUUGUGCGUG	-13.53	0.390589
ACCAAACCAACCAUAUCCAA	ACGGGGCGUGGUUGGUGGGCG	-18.02	0.39055
UCUUUACCAACCACCACAAACCUCUAU	UGGUGGUCGGUGUUUCGUGGA	-15.7	0.390547
UAUUCUGUUAUUUACUUGUAC	UUCAAGUAAUUCAGGAUAGGUU	-12.79	0.390534
AAUUUGCUGAUGAUU	AUUCAUCAGCGACUAACCCGC	-13.02	0.390522
GCUCUCACUCAACAUGG	AUUAUGAGAUCUGAGGGCC	-13.35	0.390465
ACUCAAUUACCCCCUGCA	AGGGGUGCUAUCUGUGAUUGAGG	-17	0.390446
AUAAGAAACCUGCUUCAA	CUGCAGUCGGUUUCUUACUUC	-13.72	0.390438
GAGAAUUUGACUAAAG	UUCACAGUGGUUAAGUUCUG	-12.13	0.390409
UUGUACUAAUUAUAUGCCUUAUUUCUU	AUGGGUAUAGGUCUAGUAU	-11.75	0.390365
AUUGUUUUUAUGUGUGUU	UAUACAUACACGCACACAUAG	-12.07	0.390362
GCUCUCACUCAACAUGG	GCCAUGUUGAUUUGGUGGCU	-10.75	0.390341
UUUACUCAACCGCUACUUUAGAC	UAGUGGUUGUGAAUUUACCUU	-11.14	0.390329
UUAAAAAUCUGAAUUCUUC	AAAAGUUCGUUCAGAUUUUUCU	-10.55	0.390307
UGUAUUAAUGCUAAC	CUCCUACAUGUUAGCAUUAAG	-11.95	0.390268
UAUUCUGUUAUUUACUUGUAC	GAGUAUUUGACAGACUGUGG	-13.03	0.390237
UUGUACUAAUUAUAUGCCUUAUUUCUU	UGAGGUAGUUGUUUGUACAGUU	-12.88	0.390185
UCUUUACCAACCACCACAAACCUCUAU	CGUGGUUGGUGGCUGAACUUAG	-15.4	0.39017
ACAACAUGUUAAAAACUGUUUA	AAGACGGUUUUAGAUGUUGCC	-12.81	0.390073
AAUGGGUGAAUGAUUU	UUGUAGAGUCAUACACCUCU	-10.68	0.390066
UUUACUCAACCGCUACUUUAGAC	AAAAGCUGGGUUGAGAGGA	-13	0.390039
UAUUGAAUAUCCUAUAA	UAGAGAUAUUCGAUAAUGUUUUG	-11.03	0.390028
UUUACUCAACCGCUACUUUAGAC	AAGUAGUAGUUGAACUAUCUUC	-10.51	0.389981
ACCAAACCAACCAUAUCCAA	UCGGGGUGUGGGAGUGGUAU	-16.03	0.389929
UUUACUCAACCGCUACUUUAGAC	GUUGAGGUAGUAGGUUGUAUGGUUU	-16.32	0.389778
UUGUACUAAUUAUAUGCCUUAUUUCUU	AGAGGUAUAGGGCAUGGGAA	-14.79	0.389723
CUGUCUUUAUUUCACCUUAUAAUU	AUGAGGUGGACUUGCGGCAGAA	-16.09	0.389588
AAAGAACUUCACAACUGCUC	UAGGGGGCGGCUUGUGGAGUGU	-17.82	0.389508
ACUCAAUUACCCCCUGCA	UGCUCAGGGGGUCAGUGGGGC	-17.9	0.389469
AUAAGAAACCUGCUUCAA	AUAAGUAGGUUCUUAUUCGGCU	-12.38	0.389431
CUGUCUUUAUUUCACCUUAUAAUU	UGAGAUGAAGAUAUGGGUGAU	-13.57	0.389383
ACACCUAUCCUUCU	GGAUAGGUUGAAUUCAUCGU	-11.79	0.389366
ACACCUAUCCUUCU	AAAACCUUCAGAAGGAAAGGA	-10.64	0.389316
CACAUGCUUUUCCA	UAGAGAGGGGAAGGAUGUGAUGU	-16.96	0.389259
UUACAAACAAUUUGAUACUU	GUAAAUGUGAUAAUUGUUUGUAA	-10.93	0.389245
ACAAUUGGAACUGUAACUUUG	CAAAAACCACAGUUUCUUUUGC	-11.49	0.389228
UAAUUCUUUCACAC	AGAGGUAGGUGUGGAAGAA	-13.38	0.38918
UUUACUCAACCGCUACUUUAGAC	CAUAAAGUAGCGAGCACGACU	-13.59	0.389175
GCUCUCACUCAACAUGG	CUGGGUGAGGGCAUCUGUGGU	-15.9	0.389134
GAAGAGCAACCAAUG	CUGUUGGUCUCUCUUUGUAA	-12.47	0.38908
UUGUGCAAACUUUA	UUUGUUCUGUGAAGUUUGUAUU	-11.54	0.389076
CACAUGCUUUUCCA	UCCAAUAGGUCUAGCAUGUGC	-13.96	0.389075
UUUACUCAACCGCUACUUUAGAC	AAUUGGUGGUACUUGAGGA	-12.31	0.389064
ACCAAACCAACCAUAUCCAA	UAACAACAUUGGAUGAGGGUUGGA	-14.84	0.388991
UUUACUCAACCGCUACUUUAGAC	CUGUCCUAAGGUUGUUGAGUU	-13.47	0.388969
UUACCCACUUACUAAA	GAAAUCAAGGGUGGGUAAGAC	-14.34	0.388934
UAAACGAACAUGAAAAUU	AAAAGUUCGUUUGGUUUUUUC	-10.17	0.38891
ACCAAACCAACCAUAUCCAA	UUAGGACUAUGGUUUGGACAA	-12.81	0.388889
UUUACUCAACCGCUACUUUAGAC	AAAGGUGGCCGUGGGUGAAUGA	-15.86	0.388821
ACUCAAUUACCCCCUGCA	CAGCAGGGGAGAGAGAGGAGUC	-18.54	0.388761
GCUCUCACUCAACAUGG	CGGUGUGGGUGGGUGCAUGA	-15.69	0.388751
UUGUACUAAUUAUAUGCCUUAUUUCUU	UGAGGUAGUAGAUUGUAUAGU	-12.63	0.388615
AAUAAUUAAUCUUGUACAA	CAUUGUACAAGGUAUUCCAUUU	-11.75	0.388558
CGAAUACCAUAAUGAAU	AAAAGUAAUUGUGGUUUUUGC	-10.56	0.388521
UCUUUACCAACCACCACAAACCUCUAU	AAAGUUGAUGGUGGUACACAG	-12.99	0.388457
AAACUAUUUUUAGAGAUACU	CAGUAUUUCUGAAAUUCUAUUUUC	-11.14	0.388424
AUAAGAAACCUGCUUCAA	UAAGUCAUGAAAAGGUUUUUUU	-10.42	0.388371
CUGUCUUUAUUUCACCUUAUAAUU	UGGGAGAAAAGAUAGAAUGUG	-13	0.388292
ACCAAACCAACCAUAUCCAA	GCUGGUUUCAUAUGGUGGUUUA	-13.85	0.388281
GCUCUCACUCAACAUGG	AGCAAUGUUGAGCUUGGGCCU	-14.14	0.388248
UCUUUACCAACCACCACAAACCUCUAU	UGGAGGUUUCUGGCCCGGCUGG	-17.06	0.388168
UCUUUACCAACCACCACAAACCUCUAU	AGUGGUUGGUUUGGUGCUGUC	-14.83	0.388118
AAUGGGUGAAUGAUUU	AUAUACAUACACACCCAUAUAC	-11.67	0.388094
ACUCAAUUACCCCCUGCA	GGCGGGUGGUUGUUGUUAUG	-13.88	0.388035
UUGUACUAAUUAUAUGCCUUAUUUCUU	UGUGGUUAAGUUGGUGCA	-11.45	0.388004
CCAAUGGAAAAACUCAA	UGAGUUAUCAUUGGUCUUGUG	-12.5	0.387958
UUUACUCAACCGCUACUUUAGAC	UAUCACAGUGGUUGAGAGAGCG	-15.04	0.387929
GCUCUCACUCAACAUGG	CAAGGCUGUUGAGUUGAGAUC	-13.61	0.38786
CAAGCUUUGUUAAA	AAAUUGGCAGAGCUUCCUCUU	-11.62	0.38785
CUGUCUUUAUUUCACCUUAUAAUU	CAUACGGAGGGAGAUGGAGGCG	-17.77	0.387822
AAAGAACUUCACAACUGCUC	CUUGGCACUUGUGGAAUUUUUUG	-13.39	0.387779
CUUUACUUGCUUUACA	AGUGUAGCAGGUAAACCAGGA	-14.01	0.387766
UCUUUACCAACCACCACAAACCUCUAU	CUGGUUUCAUAUGGUGGUUUAGA	-14.06	0.387755
CGAAUACCAUAAUGAAU	GAGAAGUUCGUUCUGGUGUUU	-12.51	0.387667
UAUUCUGUUAUUUACUUGUAC	UGCAGCAGGUGGAUUAUAGAC	-14.75	0.387648
UUGUACUAAUUAUAUGCCUUAUUUCUU	UGAGGUAGUUGGUUGUAUUGUU	-13.4	0.387619
GAAGAGCAACCAAUG	AUUGGUUGUUCUGAUUCGAGGCUA	-15.02	0.387613
AAUGGGUGAAUGAUUU	UUAUUCAUUCACAAAAGCUUUA	-10.65	0.387555
UCUUUACCAACCACCACAAACCUCUAU	UCAGGUCCUCGGUGGUUUAU	-13.68	0.387535
UUAAAAAUCUGAAUUCUUC	UGAGGAGUUUAGAGCAAGUAA	-13.18	0.387533
ACUCAAUUACCCCCUGCA	CUAGGUGGGGGGCUUGAAGC	-15.4	0.387519
GCUCUCACUCAACAUGG	UGGGUGAGAGAAACGCGUAUC	-14.14	0.387503
UUACCCACUUACUAAA	UAAGGCACGCGGUAAGUGGGU	-14.54	0.387423
CCAUACCCACAAAUUUUAC	ACAAAGUUUGUUCGGGUUUUA	-11.33	0.38735
UUUACUCAACCGCUACUUUAGAC	UGAGGUAGUUGGUUGUAUCGGU	-14.56	0.387337
UCUUUACCAACCACCACAAACCUCUAU	UGGGGGUGUGGGGAGAGAGAG	-18.27	0.387322
AAACUAUUUUUAGAGAUACU	AUUGAAACCUCUAAGAGUGGA	-12.2	0.387302
AAAGAACUUCACAACUGCUC	GAUUUCAGUGGAGUGAAGUUCA	-12.01	0.38717
UUUACUCAACCGCUACUUUAGAC	UGAGGUAGUAGUUUGUGUAGUU	-13.55	0.387143
UUACCCACUUACUAAA	AGUGGGUGGUGUGGUAAGAUU	-14.77	0.386953
CACAUGCUUUUCCA	AUCGGAAAAGUCAUGAUGCAUU	-12.76	0.386901
GAAAUGAACGAAAUGU	CAAAAUUUCGUUCUAAAGAUUUU	-9.92	0.386895
GCUCUCACUCAACAUGG	CAGAAGGGGAGUUGGGAGC	-15.26	0.386819
GCUCUCACUCAACAUGG	UAAGUGCUUCCAUGUUUGAGUGU	-14.01	0.386803
UAUUCUGUUAUUUACUUGUAC	UCGUACCGUGAGUAAUAAU	-10.78	0.386657
GCUCUCACUCAACAUGG	AAAUCAAGCAUGGGUGAGA	-11.85	0.386623
UUUACUCAACCGCUACUUUAGAC	UGAGGUAGUAGGAUGUAGA	-12.7	0.386606
ACCAAACCAACCAUAUCCAA	AGGGAGGGUGUGGUAUGGAUGU	-17.14	0.386558
AUACAAUGUAACAC	UUGUUUUGCAUUGUAUAGGUA	-11.23	0.386442
UUUACUCAACCGCUACUUUAGAC	GUCUGGAAAGGUCGGAUGAGU	-13.78	0.386427
UUGUACUAAUUAUAUGCCUUAUUUCUU	UCACUGGGUGUAUGAUUAUUG	-12.46	0.386357
ACCAAACCAACCAUAUCCAA	AAGAUGUGGAAAAAUUGGAAUC	-12.17	0.386349
AAAUGAUUGCUCAA	GUAGGUUCAUGAGUAGUCAUAU	-12.49	0.386328
AAAGAACUUCACAACUGCUC	GUACGGGAGGUUGCGAGGUUC	-15.9	0.386297
UCUUUACCAACCACCACAAACCUCUAU	GCAAGUGGUGGUGAGGAGGGGAAAC	-20.18	0.386294
UUGUGCAAACUUUA	UGAAUAUGUUUGUACAAGCUUU	-11.14	0.386269
UUUACUCAACCGCUACUUUAGAC	CUUUGGUUGGGUAGAACUACC	-12.04	0.386269
AAUGGGUGAAUGAUUU	CUCAUUCACUCAGCCGGUACA	-15.06	0.386253
UCUUGUCUGUUAAUC	UAGACAAGAAGAAUGAAAGAU	-11.45	0.386172
UUUACUCAACCGCUACUUUAGAC	AGAGGUAGUAGGUUGCAUAGUU	-14.18	0.386166
ACUCAAUUACCCCCUGCA	AGGGCAUGUCCAGGGGGU	-14.4	0.386163
AAAGAACUUCACAACUGCUC	AAUGGAGGCAAGUGUGAAGGA	-14.68	0.386113
GCUCUCACUCAACAUGG	CAAAAGGGGAGUGGGAAAAUC	-14.13	0.386066
AUUGUUUUUAUGUGUGUU	AGGACUUAACACGCAUGUGAACA	-14.22	0.385889
GAAGAGCAACCAAUG	CAAAAACCUCAGUUGCUUUUG	-10.6	0.385876
UCUUGAAACUGCUCAA	GGGAGCAAAGUUUCAGGUUC	-12.98	0.38585
UUUACUCAACCGCUACUUUAGAC	UCAGGUACCUGAAGUAGCGCG	-13.74	0.385847
CUGUCUUUAUUUCACCUUAUAAUU	GUGAAAUUUAUUUAUAGGCAGA	-11.47	0.385806
AAUGGGUGAAUGAUUU	GAAACAUUCACUCGGGUUUUU	-11.87	0.385765
UCUUUACCAACCACCACAAACCUCUAU	GGUUGGUGUGGGAAGUGAGGAUGG	-18.96	0.385679
AAAGAACUUCACAACUGCUC	AGGUUGUGUGUUUAUUCUUU	-10.59	0.385652
CCAUACCCACAAAUUUUAC	UGGUGGGUGAGGAGGAGG	-15.19	0.385631
AAAGAACUUCACAACUGCUC	AGCACGGUAUGAAGUUCCUA	-12.93	0.385625
AAUUUGCUGAUGAUU	UUGAAGGUUCAUUAGCAGAGUA	-13.19	0.38556
UUAGAUAUAUGAAUUCA	ACUGAAUUUAUGUGUGUACUUGA	-12.92	0.385557
AUCCAUCAAAACCA	AGAGGUGUUGAUGGACAUC	-11.12	0.385442
UAAACGAACAUGAAAAUU	GUCAUUAUUUUCAUGCUUCA	-10.5	0.385321
UUGUACUAAUUAUAUGCCUUAUUUCUU	AGGGCGUUUUGGUACAUGACU	-13.86	0.385214
ACUCAAUUACCCCCUGCA	GGGUGGUGGUUGACUUCUUUCU	-14.69	0.38516
UCUUUACCAACCACCACAAACCUCUAU	AAAGGUAAUUGUGGUUUCUGC	-12.44	0.385139
AACACGUUUGAAAU	AUAUGUUUUAGACGUGUUCAGG	-11.86	0.385065
UUACCCACUUACUAAA	CGUCAAAGUGGUGGGUGAUUUG	-14.64	0.38506
UCUUUACCAACCACCACAAACCUCUAU	CGGUUGAUUUUGGAUGGUAGACU	-14.45	0.385025
UCUUUACCAACCACCACAAACCUCUAU	CAGAGGUUAAUGUGUCGUAAA	-12.37	0.384998
CCAUACCCACAAAUUUUAC	UGAUUUCAAAGAUGUGGGUGUUU	-13.35	0.384948
AAAGAACUUCACAACUGCUC	CUAUCAGUAGGGCGAAGUUCAU	-14.35	0.384925
CACAAGUCAAACAAAUUUACAAA	UUUGUAAGCGAGUUUGAUUUUAGU	-12.81	0.384916
UUUAAUUUUUCACAAAUAUUAC	CAAAAGUAUUUGUGGUUUUUG	-9.87	0.384795
ACCAAACCAACCAUAUCCAA	AUAGUUAUUAAUCUUGGUUGGU	-11.54	0.384795
UAUUCUGUUAUUUACUUGUAC	UUCAAGUAAUCCAGGAUAGG	-12	0.384739
CUGUCUUUAUUUCACCUUAUAAUU	ACCUGAAAUAGAGGCAUUGGUG	-13.35	0.384726
GCUCUCACUCAACAUGG	CAGAAGGGGAGUUGGGAGCAG	-16.67	0.384633
CAAGCUUUGUUAAA	UAAAGCUUGAUUUGAUUUUCA	-9.86	0.384555
AUAAGAAACCUGCUUCAA	GUCUUUUUCAACAGGUUUC	-10.44	0.38453
UUUACUCAACCGCUACUUUAGAC	UGAGGUAGUAGGUUAUGUUGUU	-13.15	0.384503
AAUUUGCUGAUGAUU	UAAAGCUUCAUCAGCAGGACUG	-13.27	0.384415
UCUUGUCUGUUAAUC	AGAACAAUGAAAGCAGACGAGG	-14.5	0.384411
UCUUGAAACUGCUCAA	GUGAGCAAAGUUUCAGGCGUGU	-14.62	0.384332
UUACCCACUUACUAAA	GUUUAGUCAGGUGGGGUGUGA	-15.18	0.384304
UAUUCUGUUAUUUACUUGUAC	UCAGGUGAAUGUCGGAUAUC	-13.12	0.384187
AAAGAACUUCACAACUGCUC	UCAGCAGUUGUACCAUUGAAAU	-12.47	0.384165
ACUCAAUUACCCCCUGCA	UGACUUCAGGGGGCUUUGAAUG	-14.34	0.384141
ACAAUUGGAACUGUAACUUUG	CCUGCAGUUUCGAUGAUUUUAUC	-13.54	0.384113
GCUCUCACUCAACAUGG	GAGGUCUUUCGAGUGAGAGUGA	-14.21	0.384054
UCUUUACCAACCACCACAAACCUCUAU	UUGGGGGUAGAGGUGGGCAGGA	-18.64	0.384013
UUUACUCAACCGCUACUUUAGAC	ACUGUUUUCGUGUGGUGGUGAG	-14.99	0.383965
AUAAGAAACCUGCUUCAA	AAUUCAUCACGAAGUGGUUUCU	-11.86	0.383943
UUACCCACUUACUAAA	UGAGGGAGUGGGUGGGAGG	-16.39	0.383931
UCUUUACCAACCACCACAAACCUCUAU	GAGCUGUGGGUUGGUGUUGAUGG	-17.2	0.383929
UAUUCUGUUAUUUACUUGUAC	AGUACAAGUCAUGACAUCAGA	-12.96	0.383886
UCUUUACCAACCACCACAAACCUCUAU	UGUAGAGAGUGGUGGGGUCUCU	-13.98	0.383855
UUUACUCAACCGCUACUUUAGAC	CAGCAGUUGAGUGAUGUGACAC	-14.44	0.383736
AAAGAACUUCACAACUGCUC	UGCAGUUUGCAGUUGUGGCAC	-13.2	0.383721
UCUUUACCAACCACCACAAACCUCUAU	AGUGUAGAGGGUGGUGAAGAUGCU	-17.42	0.3837
AAUUUGCUGAUGAUU	UAAAUCAGUCAUCAGUCAGAGA	-13.36	0.383688
UUACCCACUUACUAAA	UUAGUAGAGUGGAAUGCC	-11.38	0.383682
GAGAAUUUGACUAAAG	CUCAAGUUCUCAUUUCCAAUAC	-12.91	0.383655
CACAAGUCAAACAAAUUUACAAA	UUGAAAAAAUUGUGGAUUUGA	-10.04	0.383645
AAAGAACUUCACAACUGCUC	AAAAGUCUUAGAGCAGUAUU	-10.71	0.383596
ACAAUUGGAACUGUAACUUUG	AGCAAAGUUGAUAGCUUCCGAG	-13.56	0.383593
UUACAAACAAUUUGAUACUU	CUUUGUUUAAAUUGUUUGUCGCC	-12.52	0.383578
CACAAGUCAAACAAAUUUACAAA	AGAGGUAAAAAUUUGAUUUGA	-10.16	0.383541
ACUCAAUUACCCCCUGCA	UGCAGGGUUUAGUGUAGAGGG	-14.72	0.383533
GAAGAGCAACCAAUG	ACAAACACCUUGGAUGUUCUU	-10.78	0.383493
AAUUUGCUGAUGAUU	UUGCAAAGUGAAUCGUCAGCUU	-12.7	0.383454
UUCCAAAAUCAUAA	UGAAAUAAUGACUUUGGAAUUU	-10.6	0.383363
UUUACUCAACCGCUACUUUAGAC	UAAAGUAAUUGUGGUUUUGGC	-11.58	0.383317
ACUCAAUUACCCCCUGCA	CGGUGCAGGGGAUUCAGAGGAG	-17.72	0.383218
AAAGAACUUCACAACUGCUC	AACCAUGUUAAUAGCAGUUG	-10.51	0.383157
GCUCUCACUCAACAUGG	UUGAGAGCAACAAGACAUAAU	-12.05	0.383148
CUGUCUUUAUUUCACCUUAUAAUU	AGUUCUUGUAGGGUGAGACAAC	-14	0.383142
UCUUGAAACUGCUCAA	GAGGAGGAGUAGUUUUAGGUCAUU	-15.59	0.383141
GAAGAGCAACCAAUG	AGGUUGUUUGGUUUUGUUUU	-10.26	0.383122
UUGUACUAAUUAUAUGCCUUAUUUCUU	GUAUAUAAUUGGAUGCUUUGUGC	-12.57	0.383115
AAAGAACUUCACAACUGCUC	UGAGAUUGUUGGAGAGGUUCA	-13.5	0.383087
UGUCACUAAGAAAUCU	UAGUGACACUUUUUAAUGAAAU	-10.4	0.383057
GCUCUCACUCAACAUGG	CAUGUUGUGUUUUUGUAGC	-10.48	0.383041
CUGUCUUUAUUUCACCUUAUAAUU	UGAAAUUAGGACGGAAAUUACAC	-13.09	0.382972
ACUCAAUUACCCCCUGCA	AAGGGGGGAGCAUUGGGUGGCA	-17.87	0.382901
UUGUACUAAUUAUAUGCCUUAUUUCUU	CACAUAUGAUGAGUACUGAUG	-12.62	0.382888
UCUUUACCAACCACCACAAACCUCUAU	UUUAGUCGCGGUUGGUGUUA	-12.14	0.382845
UUUACUCAACCGCUACUUUAGAC	UGAGGUAGUAGAUUGUGUAGUU	-13.55	0.382768
AAAGAACUUCACAACUGCUC	UUCACAGUGGUUAAGUUCUGC	-12.5	0.382731
ACUCAAUUACCCCCUGCA	UGACUAGGGUAGUAUGAGUAGA	-14.24	0.382693
UUGUACUAAUUAUAUGCCUUAUUUCUU	UGUUAGUGAUAAGGCGUGAUG	-12.98	0.382665
AAUGGGUGAAUGAUUU	CCUUAUCAUUCACCAGUCCGG	-14.51	0.382648
UCUUUACCAACCACCACAAACCUCUAU	UCACUCAAGGAGGUUGUGAUGG	-13.97	0.382635
AAAGAACUUCACAACUGCUC	UCGUCAAAGGGGUUGUGAAAUG	-13.91	0.382563
AUUGUUUUUAUGUGUGUU	AGGACUUAGCACACAUGUGAACA	-14.45	0.382478
AUAAACCUAUUGUU	AAUAAUAUCACAGUAGGUGU	-10.13	0.382408
UCUUUACCAACCACCACAAACCUCUAU	GACGGAGGUUUGCUAAGGAA	-13.43	0.382403
UCUUGAAACUGCUCAA	GUUGAGCAAGUUGAAGAUGAA	-12.63	0.38238
UUUAUUACCCUGACA	AGCUGUCAGGGGUUACAUG	-12.95	0.382344
AAAGAACUUCACAACUGCUC	CGAUGUUGGUGAGGUUCAAUC	-12.98	0.382327
UAUUCUGUUAUUUACUUGUAC	UGAAAAAGCAAUGGAUAAUAGA	-11.66	0.382295
ACCAAACCAACCAUAUCCAA	GGUCGUGUUUGGUGUAUCAU	-12.75	0.382194
UUACCCACUUACUAAA	AGUGGGUGGAGUGGUAAGAUA	-14.84	0.38208
ACUCAAUUACCCCCUGCA	CAGGAGUGGGGGGUGGGACGU	-18.27	0.382058
UCUUUACCAACCACCACAAACCUCUAU	UGGUGGUUUACAAAGUAAUUCA	-11.53	0.382041
AAUGGGUGAAUGAUUU	CAUCAAUCAUUCAGCUGUUUGG	-12.55	0.38204
UUACAAACAAUUUGAUACUU	GAUGUUGAGUAUCAAACUGUA	-11.12	0.381999
GCUCUCACUCAACAUGG	UAAGUGCUUCCAUGUUUGAGUGG	-13.66	0.381991
UUACAAACAAUUUGAUACUU	ACAUCAAAUUGGUUGUGGAAUG	-12.3	0.381988
UCUUUACCAACCACCACAAACCUCUAU	UGAUUUAUGUGGUGAUUGUGC	-12.6	0.381934
UCUUGUCUGUUAAUC	AAUGACCUAUGAAUUGACAGACA	-13.04	0.381845
CGAAUACCAUAAUGAAU	UUCCUUUUAUUGAUUGUGGUA	-11.02	0.381843
CUGUCUUUAUUUCACCUUAUAAUU	AUUGGAGUGAAGGGAGCU	-12.52	0.381824
ACUCAAUUACCCCCUGCA	UCAAAGGGAGUUGUAGGGGAA	-14.57	0.381813
AAUUUGCUGAUGAUU	AAUCAGCAAGUAUACUGCCCU	-11.49	0.381728
AAAGAACUUCACAACUGCUC	UGUAAUUGCGGGGUUCUAAGC	-13.76	0.381692
CUGUCUUUAUUUCACCUUAUAAUU	CAGGGAGGGAUAAAGACCAGU	-14.37	0.381673
GAAGAGCAACCAAUG	UCUGAAAGAAUUGAUGCUCUUC	-11.82	0.38166
GCUCUCACUCAACAUGG	UGAGGUAUUUAUUCAUGUUGAG	-11.92	0.381562
UCUUUACCAACCACCACAAACCUCUAU	UGGUAUGGGUGAGUAGGGAAG	-15.42	0.381494
ACUCAAUUACCCCCUGCA	UGAAAGACAUGGGUAAUGAGU	-12.76	0.381465
AAUGGGUGAAUGAUUU	UGACUAGAUCCACAUUCAUCCA	-13.24	0.381446
ACCAAACCAACCAUAUCCAA	UGGUGUGGGGUUUGGAUCUCAG	-15.04	0.381435
UAUUGAAUAUCCUAUAA	CAGGAUGUUCGACUUGUUGU	-12.24	0.381427
CUGUCUUUAUUUCACCUUAUAAUU	UGUGUAGAGGUGAGAAAGAUACC	-14.77	0.381358
AAAGAACUUCACAACUGCUC	GUGAGGUUCUGAGGAGCU	-12.17	0.381266
UCUUUACCAACCACCACAAACCUCUAU	CAAAAUUUUUCGUUGCGGUGGUU	-12.98	0.381204
GAAGAGCAACCAAUG	GAUCAUGUGGUUGCUUCACC	-11.76	0.381199
AUAAGAAACCUGCUUCAA	UGAGGUAGGUGCGAGAAAUGA	-14.47	0.381191
CCAUACCCACAAAUUUUAC	CAAGUUUGUGUCUAUGGGUGUG	-14.32	0.381155
UAUUCUGUUAUUUACUUGUAC	UGCAAGUGACGAUAUCAGACA	-13.1	0.381146
UUUACUCAACCGCUACUUUAGAC	UCUCAAAGUGGCUGUGAAAUG	-12.57	0.38114
GAAGAGCAACCAAUG	UGGGUUGCUUAAAUACUAUUCU	-12.04	0.381133
ACAAUUGGAACUGUAACUUUG	GUAAAGCUACAGUUCGGACUUCU	-14.09	0.38112
GCUCUCACUCAACAUGG	UGAAAGACAUGGGUAGUGAGAU	-14.17	0.381119
UCUUUACCAACCACCACAAACCUCUAU	UGGGGGCUGGAUGGGGUAGAGU	-18.16	0.381112
GCUCUCACUCAACAUGG	AGAAAGACAUGGGUAGUGAGAU	-14.18	0.38108
UUGUACUAAUUAUAUGCCUUAUUUCUU	AAAGGCAUAAAACCAAGACA	-10.43	0.381074
CUUUACUUGCUUUACA	GUUGAGGCGAGUUGAAGACU	-13.43	0.380993
CACAUGCUUUUCCA	CUGGAGAUAUGGAAGAGCUGUGU	-15.75	0.380987
CCAAUGGAAAAACUCAA	UUGAGUCCUUCCAUUAGAUCC	-13.22	0.38098
CACAUGCUUUUCCA	UUGGGAAAAGCAGUACUUACCA	-12.37	0.380967
AUAAGAAACCUGCUUCAA	UCACAAGUGAGGAGGCAGGUU	-15.01	0.380964
UGUCACUAAGAAAUCU	UGGAUUUCUUUGUGAAUCACCA	-11.48	0.380889
UCUUUACCAACCACCACAAACCUCUAU	UUGGGGGUGAGGUUGGUGUCUGG	-18.21	0.380883
ACAAUUGGAACUGUAACUUUG	UAUGUUGCAGAUUCUUCAUUU	-10.98	0.380853
GCUCUCACUCAACAUGG	UCACAACCUUUUUGAGUGAGCGA	-12.86	0.380811
CCAUACCCACAAAUUUUAC	UGGUGAAAUUUGUAGAUUGGA	-11.99	0.380756
UUUACUCAACCGCUACUUUAGAC	CCCUAAAGUAGAAAUCACUA	-11	0.380623
AUAAGAAACCUGCUUCAA	UUUGCAGGUUUUAGGUCUAAGU	-13.05	0.380577
ACCAAACCAACCAUAUCCAA	AUGGGUGAUGGGUGUGGUGU	-15.05	0.380531
UCUUGAAACUGCUCAA	AAGAGUACUGUAGUUUCAAAAU	-11.22	0.380468
UCUUGUCUGUUAAUC	UCCCAUGAUGACAGAUGAGAUA	-12.49	0.380445
AAUCAUCAUCUAAA	UAGCACUGAAGAUGAUGAUGG	-13.66	0.380395
UUACCCACUUACUAAA	AUUUCUAGUGAGUGAGGAUGUUA	-13.37	0.38037
GAAGAGCAACCAAUG	AGGUAGUUGGUUGUGUUG	-11.25	0.380325
AUAAGAAACCUGCUUCAA	CUUAGCAGGUUGUAUUAUCAUU	-12.01	0.380063
CUGUCUUUAUUUCACCUUAUAAUU	AGUGGGUGGAGUGGUAAGAUA	-14.76	0.380021
UUACCCACUUACUAAA	UGUGGGUGGGGUGGAAAGAUU	-15.33	0.38002
UUGUACUAAUUAUAUGCCUUAUUUCUU	AACAGGUUAUAUAUGGUGCAGU	-13.3	0.38
UGUCACUAAGAAAUCU	UGAGGUAUCUUAGUUAGACAGA	-12.42	0.379933
UGUCACUAAGAAAUCU	CGUGGUCUCUUAGUGGCAUCUC	-15.34	0.379891
UUUACUCAACCGCUACUUUAGAC	UUGGUGGUUAGUAGAAUUAAGACU	-13.81	0.379813
CACAUGCUUUUCCA	UACUUGGAAAGGCACCAGUU	-11.36	0.379806
AAAGAACUUCACAACUGCUC	UCGAGAUGUGAAGGACUUUGU	-13.28	0.379754
ACUCAAUUACCCCCUGCA	CGGGGUGGUUUUUAGUCAG	-12.66	0.379724
UCUUUACCAACCACCACAAACCUCUAU	ACGGGGCGUGGUUGGUGGGCG	-17.52	0.379714
UCUUUACCAACCACCACAAACCUCUAU	CAGGUGGAGGUGUGAGGUC	-15.03	0.379641
UCUUUACCAACCACCACAAACCUCUAU	UAUCAUGGAGUUGGUAAAGCAC	-12.96	0.379613
UUUACUCAACCGCUACUUUAGAC	UGAUUGUAGCCCUUUUGAGUAGA	-14.11	0.379607
UAUUCUGUUAUUUACUUGUAC	UCUCAGGAGUAAAGACAGAGUU	-13.32	0.379595
UUUACUCAACCGCUACUUUAGAC	AUAGUGGUUGUGAAUUUACCUU	-11.25	0.379555
UUGUACUAAUUAUAUGCCUUAUUUCUU	CAAGGAGUAAUUAGUGACAUC	-12.44	0.3795
ACACCUAUCCUUCU	GUAGAAGGAUGUUGGAAAAUA	-11.8	0.379421
CCAAUGGAAAAACUCAA	CAUUGAGUUCGUAUUUCCA	-10.54	0.37941
UUACCCACUUACUAAA	AGGUAGUAGGUGUGUGGUUU	-13.26	0.379291
CGAAUACCAUAAUGAAU	AAAAAGUUCAUUUGGGUUGUCU	-11.89	0.379266
ACUCAAUUACCCCCUGCA	GGGGGCAGGGGAAGACAGA	-16.11	0.379237
UUGUACUAAUUAUAUGCCUUAUUUCUU	UAAAUGCAUUAUUUGGUACGACA	-12.07	0.379202
ACACCUAUCCUUCU	AGAAGGGAAGAUGGUGAC	-12.39	0.379131
UUACCCACUUACUAAA	GGAUAGGUGGGUUUCAUUGA	-12.84	0.379097
AACACGUUUGAAAU	GUGAGCAAAGUUUCAGGCGUGU	-14.42	0.379075
AAUGGGUGAAUGAUUU	UACAUACUUCUUCAUAUACCCAU	-12.59	0.378875
UCUUUACCAACCACCACAAACCUCUAU	GGGUGGUGGUGGAAGUCGGGG	-17.92	0.378858
AAACUAUUUUUAGAGAUACU	UCAGAAACAGUGUCUCAU	-9.88	0.378834
AACACGUUUGAAAU	UCAGACGUGUCAUUUUUCCUAUUA	-13.74	0.378825
UUAGAUAUAUGAAUUCA	AAAUUCAUGUUCAAUCUAAACC	-10.66	0.37882
UCUUGUCUGUUAAUC	UCAAAACAGACAAACAGGAAU	-11.69	0.378685
AAUGGGUGAAUGAUUU	AUAUCACCCAUACAUCCAGAUA	-12.88	0.378601
UAUUGAAUAUCCUAUAA	UCAUAGGAUAUUGGAGUCUU	-11.19	0.378552
UCUUGAAACUGCUCAA	AGAUCAUGUUGCAGUUUCAUC	-12.41	0.378469
ACCAAACCAACCAUAUCCAA	UGAGGAUAUGGCAGGGAAGGGGA	-18.14	0.378469
ACAAUUGGAACUGUAACUUUG	AUAUGUUGCAGAUUCUUCAUU	-10.99	0.378444
UUUACUCAACCGCUACUUUAGAC	GUGGGGUAAUGGUGGAGUACA	-15.02	0.378433
UCUUUACCAACCACCACAAACCUCUAU	UGUCGGUUGGUUUUUGUUUG	-11.44	0.378432
ACAAUUGGAACUGUAACUUUG	UUUUUGGUUGUUAAGUUCCAUU	-10.44	0.378398
AAAGAACUUCACAACUGCUC	ACUAUGCAAUUGUGAACAAAC	-11.12	0.37836
AAAGAACUUCACAACUGCUC	CUCUUCAAGGGGUUGUGAAAUG	-13.03	0.378229
GCUCUCACUCAACAUGG	UUUGGUGUUGAAGGGGAAUAA	-12.65	0.378176
UCUUUACCAACCACCACAAACCUCUAU	AGGCGAUGUGGGGAUGUAGAGA	-16.48	0.378155
CUGUCUUUAUUUCACCUUAUAAUU	GUUAGAGAUAGAGAGAGUGAG	-13.63	0.378086
UCUUUACCAACCACCACAAACCUCUAU	CUGGGAGGUGUGAUAUUGUGGU	-15.5	0.378049
UUUACUCAACCGCUACUUUAGAC	UGAUAUGCUAAAGUGUCGGUU	-11.19	0.378041
AUACAAUGUAACAC	AGGAGUUAGAUUGUAUUUUAU	-10.18	0.378017
ACUCAAUUACCCCCUGCA	GGUGGGGUGGGGGGGUUGG	-17.38	0.37799
UCUUUACCAACCACCACAAACCUCUAU	UGUGUGGAGGUAAGGAACUACGU	-14.9	0.377981
AAUCAUCAUCUAAA	AAUGUGAUUGGAUGAUGGGUU	-12.76	0.377962
UUAAAAAUCUGAAUUCUUC	UUCAGGUAAUUCAGGUG	-10.11	0.377944
CACAUGCUUUUCCA	GGAAAAGGAUGACGAGGAUUAA	-13.67	0.377938
UUUACUCAACCGCUACUUUAGAC	AGGCUGGAGUGAGCGGAG	-12.82	0.377725
ACUCAAUUACCCCCUGCA	UGAGGGAGUUGGGUGUAUA	-13.05	0.377713
CACAAGUCAAACAAAUUUACAAA	UUUAGGAUAAGUUUGACUUUUG	-10.76	0.377676
UAAACGAACAUGAAAAUU	AAUAAGUUCGUUUGGGUUUUU	-10.31	0.377656
UAAACGAACAUGAAAAUU	UUUGUUCGUUUGGCUUAAGUU	-11.23	0.377606
UUUAUUACCCUGACA	UAUAUAGGGUCAGGGGGUUC	-14.19	0.377594
CCAUACCCACAAAUUUUAC	UGUGGGUGGGGUGGAAAGAUU	-15.23	0.377541
UAACCUUAACUUGC	ACAAGCGAGUUAAGGAUGUGACAA	-14.81	0.377517
GAAAUGAACGAAAUGU	AAAAGUUCGUUCAGGUUUCU	-10.89	0.37747
UUGUACUAAUUAUAUGCCUUAUUUCUU	UGAGGUAGUAGAUUGUAUAGUU	-12.59	0.377398
UUAAAAAUCUGAAUUCUUC	UGGGGGGUUCACAUUUUUAAGU	-13.55	0.377332
UCUUUACCAACCACCACAAACCUCUAU	UAGGUUGGUGAUCAUAUAGGAU	-13.33	0.3773
CUGUCUUUAUUUCACCUUAUAAUU	CAGAUUUCUGUGAAAUGAAG	-9.99	0.377266
UCUUUACCAACCACCACAAACCUCUAU	GGUUUGUUUGUCUGGUUCAAGG	-13.77	0.37726
UCUUUACCAACCACCACAAACCUCUAU	UGUGUGGAGGUAAGGAACUAUGC	-15.38	0.377238
CUGUCUUUAUUUCACCUUAUAAUU	CUCAAGGUGAGUAAGGGCUGCG	-15.28	0.377191
UUAAAAAUCUGAAUUCUUC	UGAGGAGUUUAGAGCAAGUAAA	-13.15	0.377115
UUUACUCAACCGCUACUUUAGAC	ACAAUUGUGUGAGUUGAGUACA	-12.24	0.377079
ACACCUAUCCUUCU	UUCAAGUAAUCCAGGAUAGG	-11.76	0.377044
UCUUGAAACUGCUCAA	CCUGCAGUUUCGAUGAUUUUAUC	-13.29	0.377021
UUGUACUAAUUAUAUGCCUUAUUUCUU	UGAAUGUGAGGCAUUGGAUUGA	-13.15	0.377007
CCAAUGGAAAAACUCAA	UCAGCAGUUGUUCCAUUGAC	-12.41	0.376974
UCUUGAAACUGCUCAA	CAGAUCAUGUGGCAGUUUCAU	-13.19	0.376857
UCUUUACCAACCACCACAAACCUCUAU	AGGUUGGUAAACUGAUAGCAAG	-12.88	0.376829
UAUUCUGUUAUUUACUUGUAC	ACCUAAAGAGUAAAUAGCAUGU	-12.18	0.37674
UCUUUACCAACCACCACAAACCUCUAU	AUGUGUCAGAUGGGUGGUUGAA	-14.53	0.376718
GAAGAGCAACCAAUG	AUGUUUACAGGGCUCUUCAUU	-12.57	0.376686
AUAAGAAACCUGCUUCAA	AGAGGUAGGUGCGAGAAAUG	-13.59	0.376663
AUUGUUUUUAUGUGUGUU	UAAACAACACAUAUAGUUUGC	-9.94	0.376658
CUGUCUUUAUUUCACCUUAUAAUU	AACUUGUGAUGAGGUGAGACAG	-13.91	0.376557
UUUACUCAACCGCUACUUUAGAC	UCUGAGGCAGUGGAAACAGAGUA	-14.73	0.376534
UUUACUCAACCGCUACUUUAGAC	UGAGGUAGUAGUUUGUAUAGUU	-12.41	0.376517
UGUCACUAAGAAAUCU	UUGUUUUUUAUUCUGAGUGACA	-10.7	0.376495
UCUUGAAACUGCUCAA	AGAUCAUCUGGCAGUUUCACC	-13.15	0.376467
CUGUCUUUAUUUCACCUUAUAAUU	AUGGGGUGAGAUGGGGAGGAGCAGC	-20.98	0.376458
AAAGAACUUCACAACUGCUC	ACAGGUGAGGUUCUUGGGAACU	-13.72	0.376406
UUUACUCAACCGCUACUUUAGAC	AAAAUAUCGGUGUUGGGUAAAA	-11.42	0.376401
UCAAGAAAUUCAAC	UGUUUUGAGUUUCUGAUAAAUU	-10.3	0.376324
GCUCUCACUCAACAUGG	UAUACAUGAGAGCAUACAUAGA	-11.73	0.376323
UUGUACUAAUUAUAUGCCUUAUUUCUU	ACAGGGAAGAGUUAGGGCAUG	-15	0.376223
CACAAGUCAAACAAAUUUACAAA	AAAUAUCUUGUAAUUGUUUGGU	-10.33	0.376184
ACCAAACCAACCAUAUCCAA	UAGGAUAUGGUGCUACUCGGUGA	-15.69	0.376169
AAUGGGUGAAUGAUUU	CAUUGUCUUCAUUUGCCCUUGC	-13.7	0.376167
UUUAUUACCCUGACA	CAAGGAUUUCUUAGGGUGAU	-11.8	0.376156
AAAGAACUUCACAACUGCUC	UCCUCGUUACUGAAGUUCA	-10.75	0.376137
UUUGAUAAAAAUCUCUAUGA	UAGAGAUAGUGUCAAAAUAGAA	-11.52	0.376102
CACAAGUCAAACAAAUUUACAAA	CAGAUUUUAAAGAUGUUUGACA	-10.47	0.376078
AAUUUGCUGAUGAUU	UCUGAAAAGGGUCAUCGGCAGA	-14.09	0.376034
UAAACAUAUAACUUCUA	UAGUAGGUUGUGUUGUUUAGU	-11.81	0.375995
AUAAGAAACCUGCUUCAA	GGAUAGGUGGGUUUCAUUGA	-12.73	0.375849
AAUUUGCUGAUGAUU	AAACUCGAGUCGUCAGUAGC	-12.54	0.375787
CUUUACUUGCUUUACA	GGGGAAAGCGAGUAGGGACAUUU	-16.26	0.375693
UUUAUUACCCUGACA	AAAAGUUCGUUGGGGUUUUU	-10.22	0.375597
UCUUUACCAACCACCACAAACCUCUAU	AUGAGGUUGGUUUAUUUUGG	-10.85	0.375433
ACACCUAUCCUUCU	GAAAUCAAGGGUGGGUAAGAC	-13.84	0.375373
AAACUAUUUUUAGAGAUACU	UCAUCCAUCUCUGAAAUUAGAC	-11.98	0.375313
AUAAGAAACCUGCUUCAA	CUCAAGAUGGAAGCAGUUUCUG	-13.5	0.375313
UUUACUCAACCGCUACUUUAGAC	UAUGGUCUGAAGUUGCUUUACA	-12.73	0.375295
CCAUACCCACAAAUUUUAC	CUCACAAAGUGGGUGUGUAUAUG	-12.8	0.375257
ACACCUAUCCUUCU	UAGGGAGGAUACCUGGUGUGU	-13.74	0.375205
UUAAAAAUCUGAAUUCUUC	UGGUAGAAUUCAGAUGAGAUCA	-12.64	0.375186
GAAGAGCAACCAAUG	CUUUGGUCAUUGGUUGAUCUU	-10.64	0.375176
UUUAUUACCCUGACA	UUCUUGCUCAGGGUUUAC	-11.03	0.37517
UCUUUACCAACCACCACAAACCUCUAU	AAAAGUAAUUGUGGUUUUGGCC	-11.83	0.375079
UUACCCACUUACUAAA	GUGGGUAGAACUUUGAUUAAUA	-11.98	0.375078
CACAAGUCAAACAAAUUUACAAA	GUAGUUUGUGUUGUUUGUUU	-10.01	0.375047
UUUACUCAACCGCUACUUUAGAC	GAAGUGACAUGUGGUUGAUGG	-13.61	0.375034
UUAGAUAUAUGAAUUCA	ACUGGAUUCAUUUCUCUGAAA	-10.73	0.374913
UCUUUACCAACCACCACAAACCUCUAU	UACGGUGGGAGGGGUGGAGUUG	-17.5	0.374893
AUAAGAAACCUGCUUCAA	UGAGGUAGUGGAUUCUGU	-11.41	0.374713
AAUUUGCUGAUGAUU	AAAAUCCACACAUCAGCACGGA	-12.23	0.374694
UUGUACUAAUUAUAUGCCUUAUUUCUU	UGAGGUAGUAGUUUGUGCUGU	-12.6	0.374665
UUACCCACUUACUAAA	AGAGGUAGGUGUGGAAGAA	-12.88	0.374636
ACUCAAUUACCCCCUGCA	AGGGGGUGUGGGGAGCAUGG	-16.46	0.374602
ACACCUAUCCUUCU	UGGGGAGGAUAGGGAGAAAGGGU	-17.9	0.374555
UUUACUCAACCGCUACUUUAGAC	UUUGUACGUGGCGGGAGAUAU	-13.66	0.374554
AUACAAUGUAACAC	UUACCCUGUUACAUUGUAGAAUGC	-13.42	0.374546
CUGUCUUUAUUUCACCUUAUAAUU	UGAGGUGAACAUGUAAUAUAU	-11.25	0.374501
GAAGAGCAACCAAUG	UUUCAUUGGUCAAUUGCUAA	-10.09	0.374397
GCUCUCACUCAACAUGG	UAGUGUUGAGAAGAUUGAGGA	-12.74	0.374266
AAUGGGUGAAUGAUUU	UGAGAUCAUAUUAGACCCAUCU	-11.62	0.374115
CCAUACCCACAAAUUUUAC	CAUCAGUGGGUAUUUGAAGUU	-11.97	0.374063
CACAAGUCAAACAAAUUUACAAA	UAAGUUAAGAUUUGUGAAGAA	-10.07	0.373932
ACUCAAUUACCCCCUGCA	UAUUCGGAAAUGUAGGGUGG	-12.35	0.373903
UUACCCACUUACUAAA	GUUGGUAAAGUGGAAUCAAA	-10.51	0.373888
UUACCCACUUACUAAA	CAAUGUAGUGUGGUAAGUGGUC	-14.25	0.37382
CCAAUGGAAAAACUCAA	AACUGAGAAUGCCAUUGGUG	-11.97	0.373712
UUUACUCAACCGCUACUUUAGAC	UCCUGGGGUUAGAGUUGAGUGG	-15.77	0.373697
ACCAAACCAACCAUAUCCAA	UAUCGUAUCCUAGGUUGGUUU	-11.87	0.373623
AAUGGGUGAAUGAUUU	AAUCAUACACGGUUCACCUAUU	-12.25	0.37359
UUGUACUAAUUAUAUGCCUUAUUUCUU	AGAGGUGUAGGCAUGGGAA	-13.56	0.373554
UUUAUUACCCUGACA	GCCGUCAGGGUCUGAUUUG	-11.92	0.373551
CCAAUGGAAAAACUCAA	AAAAGUUUGGUUGGGUUUUUCU	-11.52	0.373541
AAAGAACUUCACAACUGCUC	AUUUCAGUGGUGUGAAGAGUA	-11.49	0.373537
UCUUGUCUGUUAAUC	UUAACAGACUAUGAACACAUUU	-11.19	0.373498
ACCAAACCAACCAUAUCCAA	CGUGAUAUUGGUUUGGCUCAUC	-13.47	0.373441
GCUCUCACUCAACAUGG	UGAAAGACAUGGGUAGUGAGA	-13.47	0.373337
AAAGAACUUCACAACUGCUC	UCAGCAGUUGUUCCAUUGAC	-12.29	0.373329
UUUACUCAACCGCUACUUUAGAC	AGCACUGGAGUAGCCAAGAGA	-13.82	0.373312
UCUUGAAACUGCUCAA	GGUGAGCAAAGUUUCAGGUGUGA	-14.99	0.373257
AAAGAACUUCACAACUGCUC	AGCUGGUGUUGUGAAUC	-10.63	0.373244
ACACCUAUCCUUCU	UUGGUAUGGAGGAUGGAAAAG	-13.28	0.373243
UUACCCACUUACUAAA	GAUGGGUGAGUUGGGAAAAUA	-13.27	0.373172
UGUCACUAAGAAAUCU	UCAGGUACUUAGUGACUCUCA	-13.25	0.373134
UUGUACUAAUUAUAUGCCUUAUUUCUU	UGAGGUAGUAGGUUGUAUAG	-12.24	0.373057
ACCAAACCAACCAUAUCCAA	AGGAUGUGGUGCAGACUCA	-12.84	0.373039
UCUUUACCAACCACCACAAACCUCUAU	UGGUUGGAUGAGAAGCAAAUU	-12.12	0.373038
AAAGAACUUCACAACUGCUC	AUCGAGGAGAUGUGGAGGGG	-15.01	0.373012
UUGUACUAAUUAUAUGCCUUAUUUCUU	AAGGCACUGGAUUGGUCAGUU	-12.13	0.373001
AAUUUGCUGAUGAUU	CAAUCAGCAAGCAUACUGC	-10.07	0.372963
UUACCCACUUACUAAA	AGAGCGAAGUGGGUGGGAAUGU	-15.99	0.372901
UCUUUACCAACCACCACAAACCUCUAU	AUUCUGGUUUGUGUGGGACUGA	-13.7	0.372891
CUGUCUUUAUUUCACCUUAUAAUU	GAGAGUGCGUGAAAUGAAGAGA	-14.32	0.37282
UUUACUCAACCGCUACUUUAGAC	UUUAGAGUUUAAGGUUUAGAGUUU	-11.31	0.372775
UCUUUACCAACCACCACAAACCUCUAU	UCGUGGGGGGAAACGGUGGAU	-14.97	0.372666
AAAGAACUUCACAACUGCUC	GCGGGUUGUGGAGGGUGGAA	-15.78	0.372609
GAAGAGCAACCAAUG	UCGACGGUUGUUUUUCCAGAGG	-13.63	0.372608
UCUUGUCUGUUAAUC	UAAAAACAGGCAGUGUAAAU	-10.06	0.372593
GAAGAGCAACCAAUG	UGUGAACUGGUCAUGCUCUUAA	-12.53	0.372584
UCUUUACCAACCACCACAAACCUCUAU	AUUUCAGUGGUGUGAAGAGUA	-11.46	0.372562
ACCAAACCAACCAUAUCCAA	AUAUGGUAAAGGUUAGGGACC	-12.34	0.372472
AUAAGAAACCUGCUUCAA	UAUGGGAAAAGCAGGUGAAA	-12.12	0.372465
UCUUGUCUGUUAAUC	AGAUUGACGAGUGCAAGAAGA	-13.08	0.372437
AAUCAUCAUCUAAA	UGCUGCUAGAUGGUGAAUC	-12.3	0.372389
AAAGAACUUCACAACUGCUC	AGCGAGGUAUGGAGUUCUUACU	-13.7	0.372384
CCAUACCCACAAAUUUUAC	CACAGAAUUGUGGGAUGGCUG	-12.88	0.372362
ACACCUAUCCUUCU	UGAUGGAUGUAGGUGUAGAGA	-13.76	0.372294
AAAGAACUUCACAACUGCUC	UGAGGUAGUAGUUUGUGUAGUU	-13.03	0.372286
UUGUACUAAUUAUAUGCCUUAUUUCUU	UGAGGUAGUUGGUUGUAUGGUU	-13.8	0.372269
UCUUUACCAACCACCACAAACCUCUAU	AAUGGAGGCAAGUGUGAAGGA	-14.15	0.372173
UUGUACUAAUUAUAUGCCUUAUUUCUU	AAGAGGUAUAGGGCAUGGGAAA	-14.79	0.372169
CCAUACCCACAAAUUUUAC	AGGUGGGUAUGGAGGAGCCCU	-13.91	0.372124
ACUCAAUUACCCCCUGCA	GUAGGGGAGGUUGGGCCAGGGA	-17.88	0.372112
UAUUCUGUUAUUUACUUGUAC	UGACAAGUGAAUGAAUGGAGAGG	-14.85	0.372087
ACCAAACCAACCAUAUCCAA	UAGGAAGGUGGUUGGGCUGAGUACU	-17.61	0.37199
AUAAGAAACCUGCUUCAA	GUAGGUUUUGUGGUUUUGUU	-10.78	0.371981
CCAUACCCACAAAUUUUAC	GUGGGUAGAACUUUGAUUAAUA	-11.88	0.371947
GAAAUUAAAUUGGCAAA	UUUCAUGUCGAUUUCAUUUCAGG	-12.62	0.371942
GCUCUCACUCAACAUGG	AUUUCACCGGUUCUGAGAGCA	-13.07	0.371941
UCUUGUCUGUUAAUC	AUGACCUACAAAUUGACAGACG	-12.79	0.37191
UUCCAAAAUCAUAA	AAAAGUAAUUGUGGUUUUGGCC	-11.73	0.371909
ACUCAAUUACCCCCUGCA	CAGGGAAGUUGAGAGGAAAAUUG	-14.27	0.371905
AAAUGAUUGCUCAA	UGGGUAGUCGUUGCAUUUCC	-12.89	0.371898
UUACCCACUUACUAAA	CAUCAGUGGGUAUUUGAAGUU	-11.9	0.371875
CUGUCUUUAUUUCACCUUAUAAUU	CUCUGGGAAAUGGGACAG	-11.84	0.371859
AAAGAACUUCACAACUGCUC	GGUUGUGUGGUUGUGUGUGU	-13.42	0.371848
CUUUACUUGCUUUACA	AGGAGAAGUAAAGUAGAA	-9.89	0.371805
GCUCUCACUCAACAUGG	UGAAAGACAUGGGUAGUGAGAUU	-14.15	0.371781
CCAAUGGAAAAACUCAA	UGAAUUUUUCCAUAGCAUCAG	-11.26	0.37174
AACACGUUUGAAAU	UGUAAAUCAAAUGUGUACACCUG	-11.6	0.371676
CUUUACUUGCUUUACA	UUGAGGCGAGUUGAAGACUAAA	-13.22	0.371557
GAAGAGCAACCAAUG	CCAGAGAUGGUUGCCUUCCUAU	-13.68	0.371537
GAAGAGCAACCAAUG	GUUGGGGGCUCUUUUGGGACG	-15.01	0.371535
ACAAUUGGAACUGUAACUUUG	AGAGAAAGUUAUAGCUGUAAUA	-11.23	0.371485
UCUUUACCAACCACCACAAACCUCUAU	GGUGGGGUGGGGGGGUUGG	-17.08	0.371466
UUUACUCAACCGCUACUUUAGAC	UGAGGUAGUAAGUUGUAUUGU	-11.73	0.371438
UUUAAUUUUUCACAAAUAUUAC	CGGUAUCUUUGUGAAAAAUUUCG	-11.54	0.371419
UCUUGAAACUGCUCAA	CUUUCGAGCAGUAAUCAAAGUC	-12.29	0.371411
GAAAUUAAAUUGGCAAA	UUUGUAAGCGAGUUUGAUUUUAGU	-12.36	0.371394
UAUUCUGUUAUUUACUUGUAC	GCAAGUGAUGAUAGACCAGACA	-14.25	0.371384
UCUUUACCAACCACCACAAACCUCUAU	GGCGGGUGGUUGUUGUUAUG	-13.28	0.371261
AAAGAACUUCACAACUGCUC	UCAAAGGAGCGGUUGAUGAGAUGU	-15.53	0.371176
UUACCCACUUACUAAA	CGGUGUGGGUGGGUGCAUGA	-14.98	0.37116
AAUCAUCAUCUAAA	UGAGAUGAUGAAACUUGACAC	-12.27	0.371031
AAUGGGUGAAUGAUUU	UAGGUCACCCGUUUUACUAUC	-12.19	0.370968
GAAGAGCAACCAAUG	AAAAGUUUGGUUGGGUUUUUCU	-11.44	0.370947
UUUAUUACCCUGACA	AAUACCUCAGAAUUGUCAGGGUG	-12.56	0.370939
CCAUACCCACAAAUUUUAC	UGUGGGUUGUGGGCUGUGUGG	-16.09	0.370908
GAAGAGCAACCAAUG	UUGUGUGGUUGUUGUUUUCCU	-12.01	0.370908
UUGUACUAAUUAUAUGCCUUAUUUCUU	UAAGAUGAGUAAUAAGGUG	-10.08	0.370861
AAAGAACUUCACAACUGCUC	ACAGGUGAGGUUCUUGGGAACC	-12.37	0.370803
UUACCCACUUACUAAA	GUGAGUGAAAAAGGUGAUAAUU	-11.78	0.370673
CCAUACCCACAAAUUUUAC	UGGGGUGUGGAAUGAAUCCUU	-11.88	0.370671
UUGUACUAAUUAUAUGCCUUAUUUCUU	AGAUAUGUUUGAUAUAAUUGGU	-10.44	0.370607
ACCAAACCAACCAUAUCCAA	UUAGGACUAUGGUUUGGACGA	-12.86	0.370605
UUUAUUACCCUGACA	GUUCAGGUAAUAGAAAUGUAC	-11.05	0.370557
UUUACUCAACCGCUACUUUAGAC	AAGUGGAGUAGUGGUCUCAUCG	-13.98	0.370527
UAACCUUAACUUGC	UUGUUGGGGUUUUUUUGUAU	-10.13	0.370519
ACUCAAUUACCCCCUGCA	AAUUAUUGUAUCAUUUAGGGGGGA	-13.79	0.3705
UAUUCUGUUAUUUACUUGUAC	UCAGUGCAUAACAGAACUUUG	-11.6	0.370489
ACAAUUGGAACUGUAACUUUG	UUCGUUCGGAUUCCAAUUCAAA	-11.42	0.370418
UUACCCACUUACUAAA	UAGUGAGGAUGGGAAAUUUGU	-12.53	0.370381
AUACAAUGUAACAC	ACGGUUGCAUUGUGUUGGUCU	-13.4	0.37037
UUUACUCAACCGCUACUUUAGAC	ACAGUGAGGUAGAGGGAGUG	-14.54	0.370352
UAUUCUGUUAUUUACUUGUAC	CAGGUAAAGAUGAGAGAAAAA	-11.44	0.370346
GCUCUCACUCAACAUGG	UGUGUAGAGGGGAGUGAGGGUACU	-17.83	0.370301
GCUCUCACUCAACAUGG	UUCCAUGUUGAUCGGGGCUGCUUC	-16.42	0.370237
UUACAAACAAUUUGAUACUU	AAUUUUUUAAGGUUGUUUGUGGAA	-11.43	0.370142
UUUAUUACCCUGACA	UUAGGGUAGUUAACGGAAGUUA	-12.04	0.37012
CUGUCUUUAUUUCACCUUAUAAUU	AGAAGGGGUGAAAUUUAAACGU	-12.32	0.370081
GAAGAGCAACCAAUG	UUUUUGGUUGUUAAGUUCCAUU	-10.21	0.370062
CACAUGCUUUUCCA	UGGAAUGUUAAGAAGUAUGUA	-10.99	0.370034
AUAAGAAACCUGCUUCAA	UUGGAGGCGUGGGUUUU	-10.69	0.370024
AUAAGAAACCUGCUUCAA	UGAGGCAGUCGAUUGAAU	-10.98	0.369946
ACUCAAUUACCCCCUGCA	CGUCAAAGCGGUGGGUGAUUUAUC	-15.36	0.369942
CCAUACCCACAAAUUUUAC	CUUGUUUGUGGUGAUGUCU	-11.32	0.369935
ACUCAAUUACCCCCUGCA	UCCUGGGGUUAGAGUUGAGUGG	-15.61	0.369905
AAAGAACUUCACAACUGCUC	GAAGUUCUGUUAUACACUCA	-10.7	0.369858
UCUUUACCAACCACCACAAACCUCUAU	CGUCAAAGUGGUGGGUGAUUUG	-14.06	0.369805
AAUAAUUAAUCUUGUACAA	UGGUGUACAGAUUAAAAAGG	-10.85	0.369802
ACAAUUGGAACUGUAACUUUG	CAGAAAGUUAUGGGGUCAAUAUG	-13.58	0.369725
ACCAAACCAACCAUAUCCAA	UCAGAUAUGGGUGGAAUGGUGAUGG	-17.02	0.369679
UCUUUACCAACCACCACAAACCUCUAU	UGUGUAGAGGGGAGUGAGGGUACU	-17.8	0.369678
UUUACUCAACCGCUACUUUAGAC	UGCUGGAUCAGUGGUUUGAGUC	-13.8	0.369676
UUGUACUAAUUAUAUGCCUUAUUUCUU	UGAGGACAUGUGAUUUGGAUG	-13.09	0.36967
AAUGGGUGAAUGAUUU	CCGUUCACUCAUCUCGUCAAUCG	-14.55	0.369665
ACCAAACCAACCAUAUCCAA	AAAAGUUUGGUUGGGUUUUUCU	-11.4	0.36965
CAAGCUUUGUUAAA	UGCCACAACAAAGCUAAUAAC	-11.03	0.369638
CACAAGUCAAACAAAUUUACAAA	UGUGUGGUUUGUUUGGCCUC	-12.15	0.369638
AAAGAACUUCACAACUGCUC	GAUUUCAGUGGAGUGAAGUUC	-10.98	0.369573
UUUACUCAACCGCUACUUUAGAC	CAUGGGGUAGGGCAGAGUAGG	-16.25	0.36957
CUGUCUUUAUUUCACCUUAUAAUU	UAGGUAGGAGAAAUAAGGU	-11.12	0.369558
UUUACUCAACCGCUACUUUAGAC	UCAGAGAGGCGAUAGUUGAGUUU	-14.42	0.369554
AUUGUUUUUAUGUGUGUU	GUAAGGAACACACAUAUACAAUACC	-14.36	0.369532
CACAAGUCAAACAAAUUUACAAA	AAACAUAGAGAAGUUUGACUU	-10.11	0.369518
CUGUCUUUAUUUCACCUUAUAAUU	UGUGAUAAUGAAGGCUAUGGU	-12.63	0.369514
AAUAAUUAAUCUUGUACAA	UACCUGCUAGUACGAGAUUGUU	-12.84	0.369496
UAAACGAACAUGAAAAUU	AAAAGUUCGUUUAGGUUUUUCU	-10.34	0.369418
UCUUGUCUGUUAAUC	AUGACCUAUGAAUUGACAGACU	-12.46	0.369404
CACAUGCUUUUCCA	UUUGUAUGGAUAUGUGUGUGUA	-12.13	0.369367
UUUACUCAACCGCUACUUUAGAC	CCGUCCUAAGGUUGUUGAGUU	-13.16	0.369352
ACCAAACCAACCAUAUCCAA	AGAUCGAUGAUGGUUUGGA	-11.03	0.369267
CUGUCUUUAUUUCACCUUAUAAUU	UGAAAUAAUGACUUUGGAAUUU	-10.21	0.369259
CUUUACUUGCUUUACA	UGAAGUAGAGCAGGGACCUCA	-13.7	0.369173
UCUUUACCAACCACCACAAACCUCUAU	AGAGGUUGCCUUUGGUGAAUUC	-12.74	0.369168
CACAAGUCAAACAAAUUUACAAA	UUUGGAAAUAUUUGGCUUGACU	-11.85	0.369159
GCUCUCACUCAACAUGG	AAAAUAUCGGUGUUGGGUAAA	-10.87	0.3691
CACAUGCUUUUCCA	UGGAAUGUAAAGAAGUAUGU	-10.47	0.368922
CUUUACUUGCUUUACA	UGGAAUGUAAAGAAGUAUGU	-10.47	0.368922
CUUUACUUGCUUUACA	GUGUGAAGUGACGUAGGGAAG	-13.99	0.368837
CCAUACCCACAAAUUUUAC	AGAGGUAGGUGUGGAAGAA	-12.68	0.368819
GCUCUCACUCAACAUGG	UGAGGGAGUUGAGUGUAUA	-11.97	0.368762
ACCAAACCAACCAUAUCCAA	CUGGUUUCAUAUGGUGGUUUAGA	-13.37	0.368726
ACUCAAUUACCCCCUGCA	UGGGGGGUUCACAUUUUUAAGU	-13.24	0.3687
CCAUACCCACAAAUUUUAC	AAAAGUUUGGUUGGGUUUUUCU	-11.37	0.368677
CUGUCUUUAUUUCACCUUAUAAUU	UCAGGUGAAUGUCGGAUAUC	-12.59	0.368668
ACACCUAUCCUUCU	UUAAUGCUAAUUGUGAUAGGUGU	-12.18	0.368644
UAACCUUAACUUGC	UGGAAUGUAGUUGAGGUUAGUAA	-13.37	0.368624
AAACUAUUUUUAGAGAUACU	CGGUGGAAUCUGAGGAUAGUG	-14	0.368615
UUGUACUAAUUAUAUGCCUUAUUUCUU	UGAGGCAGUCGAUUGAAU	-10.94	0.368598
UCUUUACCAACCACCACAAACCUCUAU	UCUGGGGGCUUGUGUGGUAGG	-15.79	0.368495
AUAAGAAACCUGCUUCAA	UGAGGUAGUGUUAAAUAUUGUU	-11.02	0.368439
AAAGAACUUCACAACUGCUC	CUGCAGUUGGGACCCGUUCAC	-15.02	0.368408
CCAUACCCACAAAUUUUAC	UAAUGAUGUGGGUACGAAUGAA	-12.68	0.36839
UUUACUCAACCGCUACUUUAGAC	AAAGUUUGGAGUGUCGGGUGUU	-13.83	0.368309
GCUCUCACUCAACAUGG	AACCGGGUUGGUGGGAGGCAUG	-15.55	0.368309
CUGUCUUUAUUUCACCUUAUAAUU	UGUUUGUGGGAUGAAGGCAGGAGCC	-15.66	0.368211
UUUACUCAACCGCUACUUUAGAC	UCUGAAGUGCAGGAUAGU	-10.49	0.368199
CACAUGCUUUUCCA	GUAAGGGAAGAGGGUGGUAUUU	-14.34	0.368164
UUACAAACAAUUUGAUACUU	UGUUAUAUUGUCAGAUUGUCA	-10.89	0.368154
UUGUACUAAUUAUAUGCCUUAUUUCUU	UGAGGCGUUUAGAACAAGUUCA	-12.8	0.368133
UUUACUCAACCGCUACUUUAGAC	AGAGGUAGUGGGUUGCAUAGU	-13.83	0.368113
UAACCUUAACUUGC	AUUGAUAGUUGAGGUGUGUUU	-11.54	0.368102
AAAGAACUUCACAACUGCUC	UGAGGUAGUAAGUUGUGUUGUU	-12.74	0.368102
ACUCAAUUACCCCCUGCA	UGGGCAGGGGCUUAUUGUAGGAG	-15.96	0.368081
GAGAAUUUGACUAAAG	GUCCAUAGUAGUCAGUUCUCU	-13.22	0.36804
UUGUACUAAUUAUAUGCCUUAUUUCUU	GUAGAUAAGGUACUGGUACC	-11.19	0.367971
CCAAUGGAAAAACUCAA	GGGUGAGUUCUCCAUUGGCAGG	-15.27	0.367952
AUUUUUGUACUUGUUACU	AAUGACAAGUGCAGAUGGCGAG	-14.15	0.367915
UUGUACUAAUUAUAUGCCUUAUUUCUU	UUGAGAUUUUCAUAUAGUUACU	-10.25	0.367911
UUGUACUAAUUAUAUGCCUUAUUUCUU	AGAGGUGUAGGGCAUGGGAA	-14.4	0.36791
UAAACAUAUAACUUCUA	GAGGUUGUAGUUUGUGCUUU	-11.21	0.367903
ACACCUAUCCUUCU	AUGGGUGAUGGGUGUGGUGU	-14.55	0.367889
CUUUACUUGCUUUACA	AAAUAUCAGCAGGUAAUUCU	-10.15	0.367887
AAUGGGUGAAUGAUUU	AAUCAUUCACGGACAACACUU	-11.96	0.367887
UUACAAACAAUUUGAUACUU	GAUGUUGAGUAUCAAACUGUAU	-11.11	0.367881
ACACCUAUCCUUCU	GGCUUGCGAGGAUAGGAAAAA	-13.42	0.367873
UUGUACUAAUUAUAUGCCUUAUUUCUU	GUGGGGUAAUGGUGGAGUACA	-14.6	0.367851
CACAAGUCAAACAAAUUUACAAA	AGAUUUGUUUGAUCGUCUUGGC	-12.49	0.367786
UCUUUACCAACCACCACAAACCUCUAU	GGAAUGUUGUCUGGUUGGAGA	-13.46	0.36776
UCUUUACCAACCACCACAAACCUCUAU	UGAGGUAGGAGGUUGUGUG	-13.14	0.367655
ACCAAACCAACCAUAUCCAA	UUGUUUGGAUGUUGUCGGA	-10.97	0.367627
UUGUGCAAACUUUA	UGCUAGAUGAAGUUUGCAACAAA	-11.93	0.367529
GAAGAGCAACCAAUG	AAAAUCAAAUUGGGUUCUUUAUUU	-10.47	0.367497
[truncated: 8,539 more rows]

## Sheet: Analysis3 possible targets
miRNA sequence	Score	Target ID	Target name
[truncated: 180 more rows]
